# Supplementary material for: Unveiling the reaction pathways of hydrocarbonsviaexperiments, computations and data science
Source: Royal Society of Chemistry journal article supplement (doi:10.1039/d2cp04499d), 2022-01-01
Supplement: d2cp04499d1.xlsx [file d2cp04499d1.xlsx]

## Sheet: Sheet1
		Starting Molecules	C2H4						1-C4H8						cis-2-C4H8						trans-2-C4H8						Iso-C4H8
		Conversion[C-mol%]	0.429513	0.252252	0.489533	0.6573	23.3663		8.7575	79.1913	75.6835	70.6792	67.2699		7.18912	3.01265	55.8281	66.5971	66.795		1.58131	1.19982	41.7481	58.447	61.5065		1.42933	0.900265	4.36523	3.26615	3.61892
		Temperature[℃]	200	300	400	500	600		200	300	400	500	600		200	300	400	500	600		200	300	400	500	600		200	300	400	500	600
C1	C1Total		7.60616e-05	0.000101581	0.000553728	0.00233724	20.7818		2.27465e-05	5.41514e-05	0.000523468	0.00796169	0.922077		3.83918e-05	8.44812e-05	0.000646376	0.0151006	1.09932		4.98896e-05	6.4602e-05	0.000531097	0.013805	0.591921		0	0	0.000383696	0.00249146	0.0618354
	Methane	C	7.60616e-05	0.000101581	0.000553728	0.00233724	20.7818		2.27465e-05	5.41514e-05	0.000523468	0.00796169	0.922077		3.83918e-05	8.44812e-05	0.000646376	0.0151006	1.09932		0	0	0	0.013805	0.591921		0	0	0	0	0.0618354
C2	C2Total		99.5705	99.7477	99.5105	99.3427	76.6337		1.9591e-05	0.000142029	0.00163769	0.00778335	0.604396		0.0029676	0.00236793	0.00350642	0.0249802	0.564217		0.000165304	0.000120636	0.00123787	0.0274917	0.378679		0	0	0.00416941	0.0125701	0.0385133
	Ethane	CC	0	0	0	0	52.2516		0.253581	0.13177	0.151531	0.283195	0.364461		9.06111e-05	0.00011732	0.000313881	0.00324634	0.19258		0	0	0	0.00634106	0.148148		0	0	0	0.00867325	0.0385133
	Ethylene	C=C	99.5705	99.7477	99.5105	99.3427	24.3821		0.746419	0.86823	0.848469	0.716805	0.635539		0.00287699	0.00225061	0.00319253	0.0217339	0.371637		0	0	0	0.0211507	0.230531		0	0	0	0	0.00682244
C3	C3Total		0	0.00510206	0.0260743	0.067377	1.19316		8.56963e-05	0.00619942	0.0271292	0.0456654	2.38332		0.00189853	0.00230931	0.126151	0.409751	2.82381		0.0027552	0.00304735	0.155341	0.733855	1.54547		0.0016744	0.00234488	0.552844	0.502491	0.334739
	Propan	CCC	0	0	0	0	0.596401		0	0	0	0.000647617	0.00557768		0.000591436	0.00053953	0.000477908	0.00101464	0.0223582		0	0	0	0.000869036	0		0	0	0	0	0.00544653
	Proylene	C=CC	0	0.00510206	0.0260743	0.067377	0.596762		8.56963e-05	0.00619942	0.0271292	0.0450178	2.37774		0.0013071	0.00176978	0.125673	0.408737	2.80146		0	0	0.155341	0.732986	1.54547		0	0	0.552844	0.502491	0.329293
C4	C4Total		0.426767	0.237421	0.434002	0.545141	0.371944		92.5371	98.1408	99.4361	99.4543	92.5815		93.5739	98.5031	99.0652	98.3939	91.7639		98.951	99.6549	98.8281	97.4297	95.363		99.4833	99.7138	96.9013	98.3384	98.4867
	Isobutane	CC(C)C	0	0	0	0	0		0.0295509	0.0350575	0.0362686	0.0358027	0.0359249		0.00222546	0.00240275	0.00382504	0.0105633	0.00401255		0	0	0	0.0129633	0.00488975		0.00440975	0.00450913	0.0257259	0.0283819	0.182688
	1-Butene	C=CCC	0.0552598	0.0430501	0.0383283	0.0974474	0.0342478		91.2425	20.8087	24.3165	29.3208	32.7301		0.731625	1.49231	21.0753	27.5171	26.6696		0	0	0	28.9017	31.7286		0.14295	0.149998	0.157411	0.363115	0.501117
	Isobutene	C=C(C)C	0.000948178	0.00176251	0.00220014	0.0102878	0.00941015		0.0748476	0.0236913	0.0346043	0.114584	0.229649		0.0161771	0.0189289	0.0813322	0.393818	0.343714		0.000760093	0.000805083	0.00133185	0.116141	0.498792		98.5707	99.0997	95.6348	96.7338	96.3811
	n-Butane	CCCC	0	0	0	0	0.260278		0	0	0	0	0		0	0	0	0	0		0.452484	0.727339	20.9234	0	0		0	0	0	0	0
	t-2-butene	C\C=C\C	0.236319	0.119135	0.232467	0.252068	0.038268		0.837652	48.9209	45.0383	41.0839	34.3246		0.0130077	0.00213208	33.7328	37.0694	31.5416		98.4187	98.8002	58.2519	41.553	38.4935		0.597491	0.333284	0.579486	0.619535	0.72527
	c-2-butene	C\=C/C	0.13424	0.0734731	0.161007	0.185338	0.0297403		0.352545	28.3524	30.0105	28.8992	25.2613		92.8109	96.9873	44.1719	33.4029	33.205		0.0790241	0.126615	19.6516	26.8458	24.6372		0.167735	0.126273	0.503948	0.593514	0.69658
C5	C5Total		0.000422506	0.00333479	0.00554922	0.00990046	0		1.83318	0.170195	0.104917	0.113096	1.10007		4.47534	0.931982	0.375153	0.645256	1.28486		0.717966	0.26599	0.462231	1.08533	0.781803		0.00200428	0.00339423	1.00495	0.682764	0.335842
	1-Pentene	CCCC=C	0	0	0	0	0		0	0	0	0	0		0	0	0	0	0.00663715		0	0	0	0	0		0	0	0	0	0
	2-Methyl-1-butene	C=C(C)CCC	0	0.000235875	0.000237668	0.00090187	0		0	0	0	0	0.00660818		0	0	0.00608884	0.0245112	0.0580946		0	0	0.00776621	0	0.0406512		0	0	0	0	0
	n-Pentane	CCCCC	0	0	0	0	0		0	0.00035714	0.0015392	0.00283246	0.08023		0	0	0	0	0		0	0	0	0.0481646	0		0	0	0	0	0
	t-2-pentene	C\C=C\CC	0	0.000121782	0.000135105	0	0		0	0	0	0	0		0	0.000491607	0	0	0.00298211		0	0	0	0	0.00423223		0	0	0	0	0
	c-2-pentene	C\C=C/CC	0.000279254	0.00117746	0.00101227	0.00163894	0		0	0	0	0	0		0	0	0.0227983	0	0		0	0	0.0286011	0	0.148374		0	0	0	0	0.0975639
	2-Methyl-2-butene	C\C=C(/C)C	0	0	0	0	0		0	0	0	0	0		0	0	0	0.0368301	0.118323		0	0	0	0	0		0	0	0	0	0
	C5 others	unknown C5	0.000143252	0.00179967	0.00416418	0.00735965	0		1.83318	0.169838	0.103378	0.110263	1.01323		4.47534	0.93149	0.346266	0.583915	1.09882		0.717966	0.26599	0.425863	1.03717	0.588546		0	0	1.00495	0.682764	0.238278
C6	C6Total		0.00224695	0.00629262	0.0233532	0.031902	0.714476		0	0.00178698	0.00500691	0.0104979	0.446531		0.000220272	0.000988654	0.0396708	0.0736619	0.811562		0	0.000545572	0.0458107	0.129977	0.351124		0.000269227	0.00191605	0.267636	0.0793021	0.0643506
	4-Methyl-1-pentene	CC(C)CC=C	0	0	0	0	0		0	0	0	0	0.000939048		0	0	0	0	0		0	0	0	0	0		0	0	0	0	0
	3-Methyl-1-pentene	C=CC(C)CC	0	0	0	0	0		0	0	0	0	0		0	0	0	0	0		0	0	0	0	0		0	0	0	0	0
	2-Methyl-1-pentene	C=CC(C)CC	0	0	0	0	0		0	0	0	0.000594617	0		0.000220272	0.000988654	0.00112806	0	0.00446608		0	0	0.000391973	0.000946411	0.00322954		0	0	0	0	0
	1-Hexene	C=CCCCC	0	0	0	0	0		0	0	0	0	0		0	0	0	0	0		0	0	0	0	0		0	0	0	0	0
	2-Ethyl-1-butene	C=C(CC)CC	0.000142593	0.000623913	0	0	0		0	0	0.000350694	0.000344556	0.00728949		0	0	0	0	0		0	0	0.00478429	0.0092295	0.00393042		0	0	0.0221174	0.0056999	0.00141481
	t-3-Hexene	CC\C=C\CC	0	0	0	0	0		0	0	0	0	0		0	0	0	0	0		0	0	0	0	0		0	0	0	0	0
	c-3-Hexene	CC\C=C/CC	0	0	0	0	0		0	0	0	0	0		0	0	0	0	0		0	0	0	0	0		0	0	0	0	0
	n-Hexene		0	0	0	0	0		0	0	0	0	0		0	0	0	0	0.0084463		0	0	0	0	0		0	0	0	0	0
	t-2-Hexene	CCC\C=C\C	0	0	0	0	0		0	0	0	0	0		0	0	0	0	0		0	0	0	0	0.00462955		0	0	0	0	0
	c-2-Hexene	CCC/C=C\C	0	0.0014659	0.00682617	0.00465252	0		0	0.000794162	0.00114423	0.00138032	0.0412636		0	0	0.00975163	0	0		0	0	0.00814851	0	0		0	0	0	0	0
	2,3-Dimethyl-2-butene	C/C(C)=C(/C)C	0.000113674	0	0	0	0		0	0	0	0	0		0	0	0	0	0		0	0	0.00636827	0	0.0119959		0	0	0.0325996	0.00718041	0
	Benzene	c1ccccc1	0	0	0	0	0		0	0	0	0	0		0	0	0	0	0		0	0	0	0	0.00726727		0	0	0	0	0
	Cyclohexane	C1CCCCC1	0	0	0	0	0.714476		0	0	0.00101765	0.00202918	0		0	0	0.000568083	0	0.2892		0	0	0.00169934	0.0237971	0.13798		0	0	0.0130384	0.0108765	0.0183003
	Cyclohexene	C1C=CCCC1	0	0	0	0	0		0	0	0	0	0		0	0	0.00238694	0	0		0	0	0	0.00739951	0		0	0	0	0	0.00173781
	C6 others	unknown C6	0.00199068	0.0042028	0.016527	0.0272495	0		0	0.000992822	0.00249434	0.00614923	0.397039		0	0	0.025836	0.0736619	0.509449		0	0	0.0244183	0.0886044	0.182092		0	0	0.19988	0.0555453	0.0428977
C7	C7Total		0	0	0	0.000642193	0		0	0	0	0.000250952	0.3394		0	0	0.00337246	0.00429529	0.0458148		0	0	0.00557239	0.00925731	0.0407351		0	0	0.0769218	0.0171536	0.0131821
	2,4-Dimethyl-1-pentene	C=C(C)CC(C)C	0	0	0	0	0		0	0	0	0	0		0	0	0	0	0		0	0	0	0	0.0125247		0	0	0	0	0
	3-Methyl-1-hexene	C=CC(C)CCC	0	0	0	0	0		0	0	0	0	0.0548985		0	0	0	0	0		0	0	0	0.00234419	0		0	0	0	0.000518419	0.00572027
	5-Methyl-1-hexene	CC(C)CCC=C	0	0	0	0	0		0	0	0	0	0		0	0	0	0	0		0	0	0.000531502	0	0		0	0	0.00956943	0.00211555	0.0025208
	4-Methyl-1-hexene	CC(CC)CC=C	0	0	0	0	0		0	0	0	0	0.232762		0	0	0	0	0		0	0	0.000851488	0	0		0	0	0.0177572	0.00267118	0
	2-Methyl-1-hexene	C=C(C)CCCC	0	0	0	0	0		0	0	0	0	0.000371645		0	0	0	0	0		0	0	0	0	0.000354715		0	0	0	0	0
	1-Heptene	CCCCCC=C	0	0	0	0	0		0	0	0	0.000250952	0.019339		0	0	0	0	0		0	0	0.000759164	0.00276314	0.0101518		0	0	0	0	0.000542426
	t-3-Heptene	CCC\C=C\CC	0	0	0	0	0		0	0	0	0	0		0	0	0	0	0		0	0	0	0	0		0	0	0.0214389	0.0046193	0
	n-Heptane	CCCCCCC	0	0	0	0	0		0	0	0	0	0		0	0	0	0	0.0205299		0	0	0	0	0.013016		0	0	0.017709	0.00442768	0.000423027
	t-2-Heptene	C\C=C\CCCC	0	0	0	0	0		0	0	0	0	0.0237538		0	0	0	0	0		0	0	0	0	0		0	0	0	0	0
	3-Ethyl-2-pentene	C\C=C(/CC)CC	0	0	0	0	0		0	0	0	0	0		0	0	0	0	0		0	0	0.000952807	0	0		0	0	0	0	0
	c-2-Heptene	C\C=C/CCCC	0	0	0	0	0		0	0	0	0	0		0	0	0	0	0		0	0	0	0	0		0	0	0	0	0
	C7 others	unknown C7	0	0	0	0	0		0	0	0	0	0.00827539		0	0	0	0	0.0252849		0	0	0.00247743	0.00414999	0.00468789		0	0	0.0104473	0.0028015	0.00397558
C8	C8Total		0	0	0	0	0.184556		5.62913	1.68004	0.414721	0.341485	1.15249		1.94527	0.559142	0.368419	0.382941	1.0847		0.328109	0.0752916	0.464688	0.486446	0.630035		0.512799	0.275911	1.11745	0.328083	0.509919
	2,4,4-Trimethyl-1-pentene	C=C(C)CC(C)(C)C	0	0	0	0	0		0	0	0.000434807	0.00291548	0		0	0	0	0.0170447	0		0	0	0	0	0.0453779		0	0	0.0198904	0	0
	2,4,4-Trimethyl-2-pentene	C\C(C)=C/C(C)(C)C	0	0	0	0	0		0	0	0	0	0		0	0	0.000248891	0	0		0	0	0	0	0		0	0	0	0	0
	t-3,4,4-Trimethyl-2-pentene	C\C=C(/C)C(C)(C)C	0	0	0	0	0		0	0.00200719	0.0031064	0.00258526	0		0	0	0	0.00613173	0.0299445		0	0.000580256	0	0.0127412	0.0188033		0	0	0.0302837	0.00795229	0
	2-Ethyl-1-hexene	C=C(CC)CCCC	0	0	0	0	0		0	0	0	0	0		0	0	0	0	0		0	0	0	0	0.0269305		0	0	0	0	0
	1-Octene	C=CCCCCCC	0	0	0	0	0		0	0.0029217	0.00659655	0.00636551	0.0379772		0.0118684	0.00751204	0	0.0060226	0		0	0	0.0169146	0.0167433	0		0	0.000241158	0.023379	0.00570138	0
	t-4-Octene	CCC\C=C\CCC	0	0	0	0	0		0	0	0	0	0		0	0	0.0252588	0.0173572	0		0	0	0	0	0		0	0	0	0	0
	t-3-Octene	CC\C=C\CCCC	0	0	0	0	0		0	0	0	0	0		0	0	0	0	0		0	0	0.0422658	0.0237783	0		0	0	0	0	0
	c-4-Octene	CCC/C=C\CCC	0	0	0	0	0		0	0.00458648	0.0155899	0	0		0	0	0	0	0		0	0	0	0.0149521	0.00852544		0	0	0	0	0
	t-2-Octene	CCCCC\C=C\C	0	0	0	0	0		0	0	0	0	0		0	0	0.0206904	0	0		0	0	0.034902	0.0279417	0.0104786		0	0	0	0	0
	n-Octane	CCCCCCCC	0	0	0	0	0		0	0.00418704	0.0104134	0.00638408	0		0	0	0	0	0		0	0.000300043	0	0	0		0	0.000519606	0.0498803	0.0121561	0.00329797
	c-2-Octene	CCCCC/C=C\C	0	0	0	0	0		0	0.00517491	0.0237336	0.0223628	0		0	0	0.0382035	0	0.00860702		0	0.00106691	0.061558	0.0566391	0.0161595		0	0.00056425	0.0808683	0.0217358	0
	C8 others	unknown C8	0	0	0	0	0.184556		5.62913	1.66116	0.354847	0.300872	1.11451		1.9334	0.55163	0.284017	0.336385	1.04615		0.328109	0.0733444	0.309048	0.33365	0.503759		0.512799	0.274586	0.913147	0.280537	0.506621
C9	C9Total		0	0	0	0	0.00920309		0.000472387	0.000820641	0.00992456	0.0189619	0.383874		0.00034272	0	0.0172439	0.0468235	0.389304		0	0	0.0352651	0.0798081	0.281036		0	0.00263385	0.0655581	0.0352218	0.150282
	n-Nonane	CCCCCCCCC	0	0	0	0	0		0	0	0	0	0.0302319		0	#DIV/0!	0	0	0		0	0	0.0017075	0	0		0	0	0	0.000969637	0.00415258
	C9 others	unknown C9	0	0	0	0	0.00920309		0.000472387	0.000820641	0.00992456	0.0189619	0.353642		0.00034272	#DIV/0!	0.0172439	0.0468235	0.389304		0	0	0.0335576	0.0798081	0.281036		0	0	0.0655581	0.0342522	0.146129
C10	C10Total		0	0	0	0	0		0	0	0	0	0.0459994		0	0	0.00063032	0.00331344	0.0596859		0	0	0.00117834	0.00436352	0.0223926		0	0	0.00874728	0.00152836	0.00239128
	n-Decane	CCCCCCCCCC	0	0	0	0	0		0	0	0	0	0		0	0	0	0	0		0	0	0	0	0		0	0	0	0	0
	C10 others	unknown C10	0	0	0	0	0		0	0	0	0	0		0	0	0	0	0.0596859		0	0	0	0	0.0223926		0	0	0.00874728	0	0
C11	C11Total		0	0	0	0	0		0	0	0	0	0.0105567		0	0	0	0	0.0161537		0	0	0	0	0.00150732		0	0	0	0	0.000286136
	n-Undecane	CCCCCCCCCCC	0	0	0	0	0		0	0	0	0	0		0	0	0	0	0		0	0	0	0	0		0	0	0	0	0
	C11 others	unknown C11	0	0	0	0	0		0	0	0	0	0		0	0	0	0	0.0161537		0	0	0	0	0		0	0	0	0	0
C12~	C12~Total		0	0	0	0	0.111144		0	0	0	0	0.029763		0	0	0	0	0.0566319		0	0	0	0	0.0122806		0	0	0	0	0.00192575
	1-Dodecene	CCCCCCCCCCC=C	0	0	0	0	0		0	0	0	0	0		0	0	0	0	0		0	0	0	0	0		0	0	0	0	0
	n-Dodecane	CCCCCCCCCCCC	0	0	0	0	0.0944571		0	0	0	0	0		0	0	0	0	0		0	0	0	0	0		0	0	0	0	0
	C12~	unknown C12~	0	0	0	0	0.0166872		0	0	0	0	0		0	0	0	0	0.0566319		0	0	0	0	0.0122806		0	0	0	0	0
Total			100	100	100	100	100		100	100	100	100	100		100	100	100	100	100		100	100	100	100	100		100	100	100	100	100
