# Supplementary material for: Unveiling the reaction pathways of hydrocarbonsviaexperiments, computations and data science
Source: Royal Society of Chemistry journal article supplement (doi:10.1039/d2cp04499d), 2022-01-01
Supplement: d2cp04499d2.csv [file d2cp04499d2.csv]

source	target	weight	distance	reaction	product1	product2	ts	ts_inverse	ts_plus71	reverse_ts	reverseTS_inverse	reverseTS_plus71	source_smiles	target_smiles	source_mol	target_mol
C2H5+	C2H4	30.66	40.34	[CH2+]C	C=C	[H+]	40.34	-40.34	30.66	2.12	-2.12	68.88	[CH2+]C	C=C	C2H5+	C2H4
C6H13+	C6H13+	34.75	36.25	[CH2+]C(C)(C)CC	C[CH+]C(C)(C)C		36.25	-36.25	34.75	40.16	-40.16	30.84	[CH2+]C(C)(C)CC	C[CH+]C(C)(C)C	C6H13+	C6H13+
C6H13+	C6H13+	48.64	22.36	[CH2+]C(C)(C)CC	CC(C)(C)C[CH2+]		22.36	-22.36	48.64	23.38	-23.38	47.62	[CH2+]C(C)(C)CC	CC(C)(C)C[CH2+]	C6H13+	C6H13+
C6H13+	C4H8	46.62	24.38	[CH2+]C(C)(C)CC	C=C(C)C	[CH2+]C	24.38	-24.38	46.62	13.76	-13.76	57.24	[CH2+]C(C)(C)CC	C=C(C)C	C6H13+	C4H8
C6H13+	C4H8	40.74	30.26	[CH2+]C(C)(C)CC	C=C(C)C	[CH2+]C	30.26	-30.26	40.74	19.64	-19.64	51.36	[CH2+]C(C)(C)CC	C=C(C)C	C6H13+	C4H8
C6H13+	C5H10	43.73	27.27	[CH2+]C(C)(C)CC	C=C(C)CC	[CH3+]	27.27	-27.27	43.73	12.73	-12.73	58.27	[CH2+]C(C)(C)CC	C=C(C)CC	C6H13+	C5H10
C6H13+	C5H10	39.11	31.89	[CH2+]C(C)(C)CC	C=C(C)CC	[CH3+]	31.89	-31.89	39.11	17.35	-17.35	53.65	[CH2+]C(C)(C)CC	C=C(C)CC	C6H13+	C5H10
C4H9+	C4H9+	36.34	34.66	[CH2+]C(C)C	C[C+](C)C		34.66	-34.66	36.34	41.9	-41.9	29.1	[CH2+]C(C)C	C[C+](C)C	C4H9+	C4H9+
C4H9+	C4H9+	35.28	35.72	[CH2+]C(C)C	C[C+](C)C		35.72	-35.72	35.28	42.96	-42.96	28.04	[CH2+]C(C)C	C[C+](C)C	C4H9+	C4H9+
C4H9+	C3H6	42.35	28.65	[CH2+]C(C)C	C=CC	[CH3+]	28.65	-28.65	42.35	10.35	-10.35	60.65	[CH2+]C(C)C	C=CC	C4H9+	C3H6
C4H9+	C3H6	38.21	32.79	[CH2+]C(C)C	C=CC	[CH3+]	32.79	-32.79	38.21	14.49	-14.49	56.51	[CH2+]C(C)C	C=CC	C4H9+	C3H6
C4H9+	C4H8	32.06	38.94	[CH2+]C(C)C	C=C(C)C	[H+]	38.94	-38.94	32.06	7.72	-7.72	63.28	[CH2+]C(C)C	C=C(C)C	C4H9+	C4H8
C6H13+	C7H15+	35.78	35.22	[CH2+]C(C)C(C)C	C[C+](C)C(C)(C)C		35.22	-35.22	35.78	42.4	-42.4	28.6	[CH2+]C(C)C(C)C	C[C+](C)C(C)(C)C	C6H13+	C7H15+
C6H13+	C3H6	49.29	21.71	[CH2+]C(C)C(C)C	C=CC	C[CH+]C	21.71	-21.71	49.29	11.81	-11.81	59.19	[CH2+]C(C)C(C)C	C=CC	C6H13+	C3H6
C6H13+	C3H6	42.8	28.2	[CH2+]C(C)C(C)C	C=CC	C[CH+]C	28.2	-28.2	42.8	18.3	-18.3	52.7	[CH2+]C(C)C(C)C	C=CC	C6H13+	C3H6
C6H13+	C5H10	42.49	28.51	[CH2+]C(C)C(C)C	C=CC(C)C	[CH3+]	28.51	-28.51	42.49	11.53	-11.53	59.47	[CH2+]C(C)C(C)C	C=CC(C)C	C6H13+	C5H10
C6H13+	C5H10	38.41	32.59	[CH2+]C(C)C(C)C	C=CC(C)C	[CH3+]	32.59	-32.59	38.41	15.61	-15.61	55.39	[CH2+]C(C)C(C)C	C=CC(C)C	C6H13+	C5H10
C6H13+	C6H12	30.4	40.6	[CH2+]C(C)C(C)C	C=C(C)C(C)C	[H+]	40.6	-40.6	30.4	9.23	-9.23	61.77	[CH2+]C(C)C(C)C	C=C(C)C(C)C	C6H13+	C6H12
C6H11+	C6H11+	27.67	43.33	[CH2+]C(C)C1CC1	CC1[CH+]CCC1		43.33	-43.33	27.67	68.63	-68.63	2.37	[CH2+]C(C)C1CC1	CC1[CH+]CCC1	C6H11+	C6H11+
C6H11+	C6H11+	36.71	34.29	[CH2+]C(C)C1CC1	C[C+](C)C1CC1		34.29	-34.29	36.71	43.95	-43.95	27.05	[CH2+]C(C)C1CC1	C[C+](C)C1CC1	C6H11+	C6H11+
C6H11+	C6H11+	29.61	41.39	[CH2+]C(C)C1CC1	[CH2+]C1CCC1C		41.39	-41.39	29.61	47.88	-47.88	23.12	[CH2+]C(C)C1CC1	[CH2+]C1CCC1C	C6H11+	C6H11+
C6H11+	C6H11+	44.4	26.6	[CH2+]C(C)C1CC1	CC1CC1C[CH2+]		26.6	-26.6	44.4	27.98	-27.98	43.02	[CH2+]C(C)C1CC1	CC1CC1C[CH2+]	C6H11+	C6H11+
C6H11+	C6H11+	42.5	28.5	[CH2+]C(C)C1CC1	CC1CC1C[CH2+]		28.5	-28.5	42.5	29.88	-29.88	41.12	[CH2+]C(C)C1CC1	CC1CC1C[CH2+]	C6H11+	C6H11+
C6H11+	C6H11+	30.83	40.17	[CH2+]C(C)C1CC1	CC1CC1C[CH2+]		40.17	-40.17	30.83	41.55	-41.55	29.45	[CH2+]C(C)C1CC1	CC1CC1C[CH2+]	C6H11+	C6H11+
C6H11+	C6H11+	31.09	39.91	[CH2+]C(C)C1CC1	CC(C)[C+]1CC1		39.91	-39.91	31.09	39.05	-39.05	31.95	[CH2+]C(C)C1CC1	CC(C)[C+]1CC1	C6H11+	C6H11+
C6H11+	C6H11+	45.58	25.42	[CH2+]C(C)C1CC1	CC(C)C1[CH+]C1		25.42	-25.42	45.58	19.17	-19.17	51.83	[CH2+]C(C)C1CC1	CC(C)C1[CH+]C1	C6H11+	C6H11+
C6H11+	C5H8	43.92	27.08	[CH2+]C(C)C1CC1	C=CC1CC1	[CH3+]	27.08	-27.08	43.92	10.04	-10.04	60.96	[CH2+]C(C)C1CC1	C=CC1CC1	C6H11+	C5H8
C6H11+	C5H8	39.02	31.98	[CH2+]C(C)C1CC1	C=CC1CC1	[CH3+]	31.98	-31.98	39.02	14.94	-14.94	56.06	[CH2+]C(C)C1CC1	C=CC1CC1	C6H11+	C5H8
C6H11+	C3H6	40.98	30.02	[CH2+]C(C)C1CC1	C=CC	[CH+]1CC1	30.02	-30.02	40.98	7.12	-7.12	63.88	[CH2+]C(C)C1CC1	C=CC	C6H11+	C3H6
C6H11+	C3H6	34.88	36.12	[CH2+]C(C)C1CC1	C=CC	[CH+]1CC1	36.12	-36.12	34.88	13.22	-13.22	57.78	[CH2+]C(C)C1CC1	C=CC	C6H11+	C3H6
C6H11+	C6H10	37.55	33.45	[CH2+]C(C)C1CC1	C=C(C)C1CC1	[H+]	33.45	-33.45	37.55	3.37	-3.37	67.63	[CH2+]C(C)C1CC1	C=C(C)C1CC1	C6H11+	C6H10
C6H11+	C6H10	32.79	38.21	[CH2+]C(C)C1CC1	C=C(C)C1CC1	[H+]	38.21	-38.21	32.79	8.13	-8.13	62.87	[CH2+]C(C)C1CC1	C=C(C)C1CC1	C6H11+	C6H10
C6H13+	C6H13+	34.96	36.04	[CH2+]C(C)CCC	C[C+](C)CCC		36.04	-36.04	34.96	43.28	-43.28	27.72	[CH2+]C(C)CCC	C[C+](C)CCC	C6H13+	C6H13+
C6H13+	C6H13+	51.12	19.88	[CH2+]C(C)CCC	CC(C)C[CH+]C		19.88	-19.88	51.12	25.3	-25.3	45.7	[CH2+]C(C)CCC	CC(C)C[CH+]C	C6H13+	C6H13+
C6H13+	C6H13+	33.96	37.04	[CH2+]C(C)CCC	CC[CH+]C(C)C		37.04	-37.04	33.96	40.47	-40.47	30.53	[CH2+]C(C)CCC	CC[CH+]C(C)C	C6H13+	C6H13+
C6H13+	C6H13+	55.69	15.31	[CH2+]C(C)CCC	CC(C)CC[CH2+]		15.31	-15.31	55.69	14.97	-14.97	56.03	[CH2+]C(C)CCC	CC(C)CC[CH2+]	C6H13+	C6H13+
C6H13+	C3H6	45.92	25.08	[CH2+]C(C)CCC	C=CC	[CH2+]CC	25.08	-25.08	45.92	11.06	-11.06	59.94	[CH2+]C(C)CCC	C=CC	C6H13+	C3H6
C6H13+	C3H6	40.28	30.72	[CH2+]C(C)CCC	C=CC	[CH2+]CC	30.72	-30.72	40.28	16.7	-16.7	54.3	[CH2+]C(C)CCC	C=CC	C6H13+	C3H6
C6H13+	C5H10	43.2	27.8	[CH2+]C(C)CCC	CCCC=C	[CH3+]	27.8	-27.8	43.2	10.1	-10.1	60.9	[CH2+]C(C)CCC	CCCC=C	C6H13+	C5H10
C6H13+	C5H10	39.01	31.99	[CH2+]C(C)CCC	CCCC=C	[CH3+]	31.99	-31.99	39.01	14.29	-14.29	56.71	[CH2+]C(C)CCC	CCCC=C	C6H13+	C5H10
C6H13+	C6H12	35.59	35.41	[CH2+]C(C)CCC	C=C(C)CCC	[H+]	35.41	-35.41	35.59	3.43	-3.43	67.57	[CH2+]C(C)CCC	C=C(C)CCC	C6H13+	C6H12
C6H13+	C6H12	30.85	40.15	[CH2+]C(C)CCC	C=C(C)CCC	[H+]	40.15	-40.15	30.85	8.17	-8.17	62.83	[CH2+]C(C)CCC	C=C(C)CCC	C6H13+	C6H12
C8H17+	C8H17+	35.54	35.46	[CH2+]C(CC)CCCC	C[C+](CC)CCCC		35.46	-35.46	35.54	43.19	-43.19	27.81	[CH2+]C(CC)CCCC	C[C+](CC)CCCC	C8H17+	C8H17+
C8H17+	C8H17+	51.66	19.34	[CH2+]C(CC)CCCC	CC(C[CH+]CC)CC		19.34	-19.34	51.66	24.95	-24.95	46.05	[CH2+]C(CC)CCCC	CC(C[CH+]CC)CC	C8H17+	C8H17+
C8H17+	C8H17+	31.75	39.25	[CH2+]C(CC)CCCC	CCC[CH+]C(C)CC		39.25	-39.25	31.75	44.6	-44.6	26.4	[CH2+]C(CC)CCCC	CCC[CH+]C(C)CC	C8H17+	C8H17+
C8H17+	C8H17+	35.86	35.14	[CH2+]C(CC)CCCC	C[CH+]C(C)CCCC		35.14	-35.14	35.86	39.6	-39.6	31.4	[CH2+]C(CC)CCCC	C[CH+]C(C)CCCC	C8H17+	C8H17+
C8H17+	C8H17+	49	22	[CH2+]C(CC)CCCC	[CH2+]C(CC)CCCC		22	-22	49	23.14	-23.14	47.86	[CH2+]C(CC)CCCC	[CH2+]C(CC)CCCC	C8H17+	C8H17+
C8H17+	C8H17+	54.65	16.35	[CH2+]C(CC)CCCC	CC(CC)CC[CH+]C		16.35	-16.35	54.65	17.1	-17.1	53.9	[CH2+]C(CC)CCCC	CC(CC)CC[CH+]C	C8H17+	C8H17+
C8H17+	C8H17+	49.69	21.31	[CH2+]C(CC)CCCC	CC(CC)CCC[CH2+]		21.31	-21.31	49.69	19.32	-19.32	51.68	[CH2+]C(CC)CCCC	CC(CC)CCC[CH2+]	C8H17+	C8H17+
C8H17+	C4H8	46.08	24.92	[CH2+]C(CC)CCCC	C=CCC	CCC[CH2+]	24.92	-24.92	46.08	12.04	-12.04	58.96	[CH2+]C(CC)CCCC	C=CCC	C8H17+	C4H8
C8H17+	C4H8	40.25	30.75	[CH2+]C(CC)CCCC	C=CCC	CCC[CH2+]	30.75	-30.75	40.25	17.87	-17.87	53.13	[CH2+]C(CC)CCCC	C=CCC	C8H17+	C4H8
C8H17+	C6H12	46.62	24.38	[CH2+]C(CC)CCCC	C=CCCCC	[CH2+]C	24.38	-24.38	46.62	11	-11	60	[CH2+]C(CC)CCCC	C=CCCCC	C8H17+	C6H12
C8H17+	C6H12	41.23	29.77	[CH2+]C(CC)CCCC	C=CCCCC	[CH2+]C	29.77	-29.77	41.23	16.39	-16.39	54.61	[CH2+]C(CC)CCCC	C=CCCCC	C8H17+	C6H12
C8H17+	C8H16	31.6	39.4	[CH2+]C(CC)CCCC	C=C(CC)CCCC	[H+]	39.4	-39.4	31.6	7.75	-7.75	63.25	[CH2+]C(CC)CCCC	C=C(CC)CCCC	C8H17+	C8H16
C6H11+	C6H11+	63.09	7.91	[CH2+]C1(CC)CC1	C=C(C[CH2+])CC		7.91	-7.91	63.09	12.56	-12.56	58.44	[CH2+]C1(CC)CC1	C=C(C[CH2+])CC	C6H11+	C6H11+
C6H11+	C6H11+	60.53	10.47	[CH2+]C1(CC)CC1	C=C(C[CH2+])CC		10.47	-10.47	60.53	15.12	-15.12	55.88	[CH2+]C1(CC)CC1	C=C(C[CH2+])CC	C6H11+	C6H11+
C6H11+	C6H11+	25.73	45.27	[CH2+]C1(CC)CC1	CC[C+]1CCC1		45.27	-45.27	25.73	48.07	-48.07	22.93	[CH2+]C1(CC)CC1	CC[C+]1CCC1	C6H11+	C6H11+
C6H11+	C6H11+	29.69	41.31	[CH2+]C1(CC)CC1	C[CH+]C1(C)CC1		41.31	-41.31	29.69	44	-44	27	[CH2+]C1(CC)CC1	C[CH+]C1(C)CC1	C6H11+	C6H11+
C6H11+	C6H11+	44.08	26.92	[CH2+]C1(CC)CC1	CC1(C[CH2+])CC1		26.92	-26.92	44.08	24.28	-24.28	46.72	[CH2+]C1(CC)CC1	CC1(C[CH2+])CC1	C6H11+	C6H11+
C6H11+	C6H11+	24.1	46.9	[CH2+]C1(CC)CC1	CC1(CC)[CH+]C1		46.9	-46.9	24.1	37.18	-37.18	33.82	[CH2+]C1(CC)CC1	CC1(CC)[CH+]C1	C6H11+	C6H11+
C6H11+	C4H6	31.82	39.18	[CH2+]C1(CC)CC1	C=C1CC1	[CH2+]C	39.18	-39.18	31.82	11.81	-11.81	59.19	[CH2+]C1(CC)CC1	C=C1CC1	C6H11+	C4H6
C6H11+	C4H6	27.21	43.79	[CH2+]C1(CC)CC1	C=C1CC1	[CH2+]C	43.79	-43.79	27.21	16.42	-16.42	54.58	[CH2+]C1(CC)CC1	C=C1CC1	C6H11+	C4H6
C6H11+	C6H11+	39.37	31.63	[CH2+]C1CC(C)C1	C[C+]1CC(C)C1		31.63	-31.63	39.37	36.32	-36.32	34.68	[CH2+]C1CC(C)C1	C[C+]1CC(C)C1	C6H11+	C6H11+
C6H11+	C6H11+	33.42	37.58	[CH2+]C1CC(C)C1	C[C+]1CC(C)C1		37.58	-37.58	33.42	42.27	-42.27	28.73	[CH2+]C1CC(C)C1	C[C+]1CC(C)C1	C6H11+	C6H11+
C6H11+	C6H11+	31.87	39.13	[CH2+]C1CC(C)C1	C[C+]1CC(C)C1		39.13	-39.13	31.87	43.82	-43.82	27.18	[CH2+]C1CC(C)C1	C[C+]1CC(C)C1	C6H11+	C6H11+
C6H11+	C6H11+	57.94	13.06	[CH2+]C1CC(C)C1	[CH2+]C(C)CC=C		13.06	-13.06	57.94	15.39	-15.39	55.61	[CH2+]C1CC(C)C1	[CH2+]C(C)CC=C	C6H11+	C6H11+
C6H11+	C6H11+	53.98	17.02	[CH2+]C1CC(C)C1	[CH2+]C(C)CC=C		17.02	-17.02	53.98	19.35	-19.35	51.65	[CH2+]C1CC(C)C1	[CH2+]C(C)CC=C	C6H11+	C6H11+
C6H11+	C6H11+	28.83	42.17	[CH2+]C1CC(C)C1	CC1[CH+]C(C)C1		42.17	-42.17	28.83	42.73	-42.73	28.27	[CH2+]C1CC(C)C1	CC1[CH+]C(C)C1	C6H11+	C6H11+
C6H11+	C6H11+	25.09	45.91	[CH2+]C1CC(C)C1	C[CH+]CC1CC1		45.91	-45.91	25.09	44.63	-44.63	26.37	[CH2+]C1CC(C)C1	C[CH+]CC1CC1	C6H11+	C6H11+
C6H11+	C6H10	33.42	37.58	[CH2+]C1CC(C)C1	C=C1CC(C)C1	[H+]	37.58	-37.58	33.42	3.12	-3.12	67.88	[CH2+]C1CC(C)C1	C=C1CC(C)C1	C6H11+	C6H10
C6H11+	C6H10	29.41	41.59	[CH2+]C1CC(C)C1	C=C1CC(C)C1	[H+]	41.59	-41.59	29.41	7.13	-7.13	63.87	[CH2+]C1CC(C)C1	C=C1CC(C)C1	C6H11+	C6H10
C4H7+	C4H7+	63.98	7.02	[CH2+]C1CC1	[CH2+]CC=C		7.02	-7.02	63.98	10.79	-10.79	60.21	[CH2+]C1CC1	[CH2+]CC=C	C4H7+	C4H7+
C4H7+	C4H7+	61.4	9.6	[CH2+]C1CC1	[CH2+]CC=C		9.6	-9.6	61.4	13.37	-13.37	57.63	[CH2+]C1CC1	[CH2+]CC=C	C4H7+	C4H7+
C4H7+	C4H7+	23.4	47.6	[CH2+]C1CC1	C1[CH+]CC1		47.6	-47.6	23.4	46.59	-46.59	24.41	[CH2+]C1CC1	C1[CH+]CC1	C4H7+	C4H7+
C6H11+	C6H11+	61.09	9.91	[CH2+]C1CCC1C	C=CCC[CH+]C		9.91	-9.91	61.09	16.67	-16.67	54.33	[CH2+]C1CCC1C	C=CCC[CH+]C	C6H11+	C6H11+
C6H11+	C6H11+	56.27	14.73	[CH2+]C1CCC1C	C=CCC[CH+]C		14.73	-14.73	56.27	21.49	-21.49	49.51	[CH2+]C1CCC1C	C=CCC[CH+]C	C6H11+	C6H11+
C6H11+	C6H11+	35.3	35.7	[CH2+]C1CCC1C	C[C+]1CCC1C		35.7	-35.7	35.3	42.05	-42.05	28.95	[CH2+]C1CCC1C	C[C+]1CCC1C	C6H11+	C6H11+
C6H11+	C6H11+	32.83	38.17	[CH2+]C1CCC1C	C[C+]1CCC1C		38.17	-38.17	32.83	44.52	-44.52	26.48	[CH2+]C1CCC1C	C[C+]1CCC1C	C6H11+	C6H11+
C6H11+	C6H11+	57	14	[CH2+]C1CCC1C	C=CC(C)C[CH2+]		14	-14	57	17.2	-17.2	53.8	[CH2+]C1CCC1C	C=CC(C)C[CH2+]	C6H11+	C6H11+
C6H11+	C6H11+	53.85	17.15	[CH2+]C1CCC1C	C=CC(C)C[CH2+]		17.15	-17.15	53.85	20.35	-20.35	50.65	[CH2+]C1CCC1C	C=CC(C)C[CH2+]	C6H11+	C6H11+
C6H11+	C6H11+	37.17	33.83	[CH2+]C1CCC1C	CC1[CH+]CC1C		33.83	-33.83	37.17	34.96	-34.96	36.04	[CH2+]C1CCC1C	CC1[CH+]CC1C	C6H11+	C6H11+
C6H11+	C6H11+	29.46	41.54	[CH2+]C1CCC1C	CC1[CH+]CC1C		41.54	-41.54	29.46	42.67	-42.67	28.33	[CH2+]C1CCC1C	CC1[CH+]CC1C	C6H11+	C6H11+
C6H11+	C6H11+	23.27	47.73	[CH2+]C1CCC1C	[CH2+]C(C)C1CC1		47.73	-47.73	23.27	42.43	-42.43	28.57	[CH2+]C1CCC1C	[CH2+]C(C)C1CC1	C6H11+	C6H11+
C6H11+	C6H10	35.29	35.71	[CH2+]C1CCC1C	C=C1CCC1C	[H+]	35.71	-35.71	35.29	3.03	-3.03	67.97	[CH2+]C1CCC1C	C=C1CCC1C	C6H11+	C6H10
C6H11+	C6H10	30.69	40.31	[CH2+]C1CCC1C	C=C1CCC1C	[H+]	40.31	-40.31	30.69	7.63	-7.63	63.37	[CH2+]C1CCC1C	C=C1CCC1C	C6H11+	C6H10
C4H9+	C4H9+	28.02	42.98	C[C+](C)C	C[C+](C)C		42.98	-42.98	28.02	35.73	-35.73	35.27	C[C+](C)C	C[C+](C)C	C4H9+	C4H9+
C4H9+	C4H8	31.87	39.13	C[C+](C)C	C=C(C)C	[H+]	39.13	-39.13	31.87	0.65	-0.65	70.35	C[C+](C)C	C=C(C)C	C4H9+	C4H8
C6H13+	C6H13+	29.54	41.46	C[C+](C)C(C)C	[CH2+]C(C)C(C)C		41.46	-41.46	29.54	34.35	-34.35	36.65	C[C+](C)C(C)C	[CH2+]C(C)C(C)C	C6H13+	C6H13+
C6H13+	C6H13+	28.24	42.76	C[C+](C)C(C)C	[CH2+]C(C)C(C)C		42.76	-42.76	28.24	35.65	-35.65	35.35	C[C+](C)C(C)C	[CH2+]C(C)C(C)C	C6H13+	C6H13+
C6H13+	C5H10	43.03	27.97	C[C+](C)C(C)C	C\C=C(/C)C	[CH3+]	27.97	-27.97	43.03	9.27	-9.27	61.73	C[C+](C)C(C)C	C\C=C(/C)C	C6H13+	C5H10
C6H13+	C5H10	39.25	31.75	C[C+](C)C(C)C	C\C=C(/C)C	[CH3+]	31.75	-31.75	39.25	13.05	-13.05	57.95	C[C+](C)C(C)C	C\C=C(/C)C	C6H13+	C5H10
C6H13+	C6H12	34.3	36.7	C[C+](C)C(C)C	C/C(C)=C(/C)C	[H+]	36.7	-36.7	34.3	1.08	-1.08	69.92	C[C+](C)C(C)C	C/C(C)=C(/C)C	C6H13+	C6H12
C6H13+	C6H12	29.75	41.25	C[C+](C)C(C)C	C/C(C)=C(/C)C	[H+]	41.25	-41.25	29.75	5.63	-5.63	65.37	C[C+](C)C(C)C	C/C(C)=C(/C)C	C6H13+	C6H12
C6H13+	C6H12	32.67	38.33	C[C+](C)C(C)C	C=C(C)C(C)C	[H+]	38.33	-38.33	32.67	-0.25	0.25	71.25	C[C+](C)C(C)C	C=C(C)C(C)C	C6H13+	C6H12
C6H13+	C6H12	31.3	39.7	C[C+](C)C(C)C	C=C(C)C(C)C	[H+]	39.7	-39.7	31.3	1.12	-1.12	69.88	C[C+](C)C(C)C	C=C(C)C(C)C	C6H13+	C6H12
C6H11+	C6H11+	64.8	6.2	C[C+](C)C1CC1	C/C(C)=C\C[CH2+]		6.2	-6.2	64.8	10.49	-10.49	60.51	C[C+](C)C1CC1	C/C(C)=C\C[CH2+]	C6H11+	C6H11+
C6H11+	C6H11+	60.59	10.41	C[C+](C)C1CC1	C/C(C)=C\C[CH2+]		10.41	-10.41	60.59	14.7	-14.7	56.3	C[C+](C)C1CC1	C/C(C)=C\C[CH2+]	C6H11+	C6H11+
C6H11+	C6H11+	25.68	45.32	C[C+](C)C1CC1	CC1(C)[CH+]CC1		45.32	-45.32	25.68	43.18	-43.18	27.82	C[C+](C)C1CC1	CC1(C)[CH+]CC1	C6H11+	C6H11+
C6H11+	C6H11+	28.25	42.75	C[C+](C)C1CC1	[CH2+]C(C)C1CC1		42.75	-42.75	28.25	35.73	-35.73	35.27	C[C+](C)C1CC1	[CH2+]C(C)C1CC1	C6H11+	C6H11+
C6H11+	C6H10	32.48	38.52	C[C+](C)C1CC1	C=C(C)C1CC1	[H+]	38.52	-38.52	32.48	-0.24	0.24	71.24	C[C+](C)C1CC1	C=C(C)C1CC1	C6H11+	C6H10
C6H11+	C6H10	31.06	39.94	C[C+](C)C1CC1	C=C(C)C1CC1	[H+]	39.94	-39.94	31.06	1.18	-1.18	69.82	C[C+](C)C1CC1	C=C(C)C1CC1	C6H11+	C6H10
C6H11+	C6H10	26.86	44.14	C[C+](C)C1CC1	C/C(C)=C1/CC1	[H+]	44.14	-44.14	26.86	1.03	-1.03	69.97	C[C+](C)C1CC1	C/C(C)=C1/CC1	C6H11+	C6H10
C6H13+	C6H13+	31.44	39.56	C[C+](C)CCC	CC(C)C[CH+]C		39.56	-39.56	31.44	37.65	-37.65	33.35	C[C+](C)CCC	CC(C)C[CH+]C	C6H13+	C6H13+
C6H13+	C6H13+	29.7	41.3	C[C+](C)CCC	CC[CH+]C(C)C		41.3	-41.3	29.7	38.8	-38.8	32.2	C[C+](C)CCC	CC[CH+]C(C)C	C6H13+	C6H13+
C6H13+	C6H13+	44.81	26.19	C[C+](C)CCC	CC(C)CC[CH2+]		26.19	-26.19	44.81	19.54	-19.54	51.46	C[C+](C)CCC	CC(C)CC[CH2+]	C6H13+	C6H13+
C6H13+	C6H13+	27.55	43.45	C[C+](C)CCC	[CH2+]C(C)CCC		43.45	-43.45	27.55	34.47	-34.47	36.53	C[C+](C)CCC	[CH2+]C(C)CCC	C6H13+	C6H13+
C6H13+	C4H8	45.28	25.72	C[C+](C)CCC	C=C(C)C	[CH2+]C	25.72	-25.72	45.28	8.35	-8.35	62.65	C[C+](C)CCC	C=C(C)C	C6H13+	C4H8
C6H13+	C4H8	41.21	29.79	C[C+](C)CCC	C=C(C)C	[CH2+]C	29.79	-29.79	41.21	12.42	-12.42	58.58	C[C+](C)CCC	C=C(C)C	C6H13+	C4H8
C6H13+	C6H12	30.19	40.81	C[C+](C)CCC	C/C(C)=C\CC	[H+]	40.81	-40.81	30.19	5.14	-5.14	65.86	C[C+](C)CCC	C/C(C)=C\CC	C6H13+	C6H12
C6H13+	C6H12	32.47	38.53	C[C+](C)CCC	C=C(C)CCC	[H+]	38.53	-38.53	32.47	0.25	-0.25	70.75	C[C+](C)CCC	C=C(C)CCC	C6H13+	C6H12
C6H13+	C6H13+	29.56	41.44	C[C+](CC)CC	C[CH+]C(C)CC		41.44	-41.44	29.56	38.91	-38.91	32.09	C[C+](CC)CC	C[CH+]C(C)CC	C6H13+	C6H13+
C6H13+	C6H13+	29.44	41.56	C[C+](CC)CC	CC(C[CH2+])CC		41.56	-41.56	29.44	35.57	-35.57	35.43	C[C+](CC)CC	CC(C[CH2+])CC	C6H13+	C6H13+
C6H13+	C6H13+	27.59	43.41	C[C+](CC)CC	[CH2+]C(CC)CC		43.41	-43.41	27.59	33.46	-33.46	37.54	C[C+](CC)CC	[CH2+]C(CC)CC	C6H13+	C6H13+
C6H13+	C5H10	42.76	28.24	C[C+](CC)CC	C=C(C)CC	[CH3+]	28.24	-28.24	42.76	7.66	-7.66	63.34	C[C+](CC)CC	C=C(C)CC	C6H13+	C5H10
C6H13+	C5H10	39.87	31.13	C[C+](CC)CC	C=C(C)CC	[CH3+]	31.13	-31.13	39.87	10.55	-10.55	60.45	C[C+](CC)CC	C=C(C)CC	C6H13+	C5H10
C6H13+	C6H12	34.53	36.47	C[C+](CC)CC	C\C=C(/C)CC	[H+]	36.47	-36.47	34.53	0.54	-0.54	70.46	C[C+](CC)CC	C\C=C(/C)CC	C6H13+	C6H12
C6H13+	C6H12	32.28	38.72	C[C+](CC)CC	C\C=C(/C)CC	[H+]	38.72	-38.72	32.28	2.79	-2.79	68.21	C[C+](CC)CC	C\C=C(/C)CC	C6H13+	C6H12
C6H13+	C6H12	31.78	39.22	C[C+](CC)CC	C=C(CC)CC	[H+]	39.22	-39.22	31.78	-0.23	0.23	71.23	C[C+](CC)CC	C=C(CC)CC	C6H13+	C6H12
C6H11+	C6H11+	42.78	28.22	C[C+]1CC(C)C1	C=C(C)C[CH+]C		28.22	-28.22	42.78	31.78	-31.78	39.22	C[C+]1CC(C)C1	C=C(C)C[CH+]C	C6H11+	C6H11+
C6H11+	C6H11+	25.92	45.08	C[C+]1CC(C)C1	CC1[CH+]C(C)C1		45.08	-45.08	25.92	40.93	-40.93	30.07	C[C+]1CC(C)C1	CC1[CH+]C(C)C1	C6H11+	C6H11+
C6H11+	C6H11+	27.18	43.82	C[C+]1CC(C)C1	[CH2+]C1CC(C)C1		43.82	-43.82	27.18	39.14	-39.14	31.86	C[C+]1CC(C)C1	[CH2+]C1CC(C)C1	C6H11+	C6H11+
C6H11+	C6H10	32.25	38.75	C[C+]1CC(C)C1	CC1=CC(C)C1	[H+]	38.75	-38.75	32.25	-0.2	0.2	71.2	C[C+]1CC(C)C1	CC1=CC(C)C1	C6H11+	C6H10
C6H11+	C6H10	29.13	41.87	C[C+]1CC(C)C1	CC1=CC(C)C1	[H+]	41.87	-41.87	29.13	2.92	-2.92	68.08	C[C+]1CC(C)C1	CC1=CC(C)C1	C6H11+	C6H10
C6H11+	C6H10	30.67	40.33	C[C+]1CC(C)C1	C=C1CC(C)C1	[H+]	40.33	-40.33	30.67	0.6	-0.6	70.4	C[C+]1CC(C)C1	C=C1CC(C)C1	C6H11+	C6H10
C4H7+	C4H7+	56.9	14.1	C[C+]1CC1	[CH2+]C(=C)C		14.1	-14.1	56.9	40.81	-40.81	30.19	C[C+]1CC1	[CH2+]C(=C)C	C4H7+	C4H7+
C4H7+	C4H7+	48.85	22.15	C[C+]1CC1	[CH2+]C(=C)C		22.15	-22.15	48.85	48.86	-48.86	22.14	C[C+]1CC1	[CH2+]C(=C)C	C4H7+	C4H7+
C4H7+	C4H7+	28.08	42.92	C[C+]1CC1	[CH2+]C1CC1		42.92	-42.92	28.08	48.59	-48.59	22.41	C[C+]1CC1	[CH2+]C1CC1	C4H7+	C4H7+
C4H7+	C4H6	28.58	42.42	C[C+]1CC1	C=C1CC1	[H+]	42.42	-42.42	28.58	2.64	-2.64	68.36	C[C+]1CC1	C=C1CC1	C4H7+	C4H6
C6H11+	C7H13+	42.47	28.53	C[C+]1CCC1C	C\C=C(/C)CC[CH2+]		28.53	-28.53	42.47	29.81	-29.81	41.19	C[C+]1CCC1C	C\C=C(/C)CC[CH2+]	C6H11+	C7H13+
C6H11+	C6H11+	40.09	30.91	C[C+]1CCC1C	C=C(C)C([CH2+])C		30.91	-30.91	40.09	30.33	-30.33	40.67	C[C+]1CCC1C	C=C(C)C([CH2+])C	C6H11+	C6H11+
C6H11+	C6H11+	25.51	45.49	C[C+]1CCC1C	CC1[CH+]CC1C		45.49	-45.49	25.51	41.91	-41.91	29.09	C[C+]1CCC1C	CC1[CH+]CC1C	C6H11+	C6H11+
C6H11+	C6H11+	26.49	44.51	C[C+]1CCC1C	[CH2+]C1CCC1C		44.51	-44.51	26.49	38.07	-38.07	32.93	C[C+]1CCC1C	[CH2+]C1CCC1C	C6H11+	C6H11+
C6H11+	C5H8	38.74	32.26	C[C+]1CCC1C	CC1=CCC1	[CH3+]	32.26	-32.26	38.74	8.18	-8.18	62.82	C[C+]1CCC1C	CC1=CCC1	C6H11+	C5H8
C6H11+	C5H8	34.87	36.13	C[C+]1CCC1C	CC1=CCC1	[CH3+]	36.13	-36.13	34.87	12.05	-12.05	58.95	C[C+]1CCC1C	CC1=CCC1	C6H11+	C5H8
C6H11+	C6H10	34.72	36.28	C[C+]1CCC1C	CC=1CCC=1C	[H+]	36.28	-36.28	34.72	1.24	-1.24	69.76	C[C+]1CCC1C	CC=1CCC=1C	C6H11+	C6H10
C6H11+	C6H10	30.71	40.29	C[C+]1CCC1C	CC=1CCC=1C	[H+]	40.29	-40.29	30.71	5.25	-5.25	65.75	C[C+]1CCC1C	CC=1CCC=1C	C6H11+	C6H10
C6H11+	C6H10	32.33	38.67	C[C+]1CCC1C	CC1=CCC1C	[H+]	38.67	-38.67	32.33	-0.19	0.19	71.19	C[C+]1CCC1C	CC1=CCC1C	C6H11+	C6H10
C6H11+	C6H10	29.4	41.6	C[C+]1CCC1C	CC1=CCC1C	[H+]	41.6	-41.6	29.4	2.74	-2.74	68.26	C[C+]1CCC1C	CC1=CCC1C	C6H11+	C6H10
C6H11+	C6H10	32.18	38.82	C[C+]1CCC1C	C=C1CCC1C	[H+]	38.82	-38.82	32.18	-0.23	0.23	71.23	C[C+]1CCC1C	C=C1CCC1C	C6H11+	C6H10
C6H11+	C6H10	31.06	39.94	C[C+]1CCC1C	C=C1CCC1C	[H+]	39.94	-39.94	31.06	0.89	-0.89	70.11	C[C+]1CCC1C	C=C1CCC1C	C6H11+	C6H10
C6H11+	C6H11+	29.31	41.69	C[C+]1CCCC1	CC1[CH+]CCC1		41.69	-41.69	29.31	38.31	-38.31	32.69	C[C+]1CCCC1	CC1[CH+]CCC1	C6H11+	C6H11+
C6H11+	C6H11+	26.35	44.65	C[C+]1CCCC1	[CH2+]C1CCCC1		44.65	-44.65	26.35	35.9	-35.9	35.1	C[C+]1CCCC1	[CH2+]C1CCCC1	C6H11+	C6H11+
C6H11+	C6H11+	37.32	33.68	C[C+]1CCCC1	C=C(C)CC[CH2+]		33.68	-33.68	37.32	15.71	-15.71	55.29	C[C+]1CCCC1	C=C(C)CC[CH2+]	C6H11+	C6H11+
C6H11+	C6H10	34.37	36.63	C[C+]1CCCC1	CC1=CCCC1	[H+]	36.63	-36.63	34.37	0.43	-0.43	70.57	C[C+]1CCCC1	CC1=CCCC1	C6H11+	C6H10
C6H11+	C6H10	32.66	38.34	C[C+]1CCCC1	CC1=CCCC1	[H+]	38.34	-38.34	32.66	2.14	-2.14	68.86	C[C+]1CCCC1	CC1=CCCC1	C6H11+	C6H10
C6H11+	C6H10	30.93	40.07	C[C+]1CCCC1	C=C1CCCC1	[H+]	40.07	-40.07	30.93	-0.24	0.24	71.24	C[C+]1CCCC1	C=C1CCCC1	C6H11+	C6H10
C6H13+	C6H13+	29.04	41.96	C[CH+]C(C)(C)C	CC(C)(C)C[CH2+]		41.96	-41.96	29.04	39.17	-39.17	31.83	C[CH+]C(C)(C)C	CC(C)(C)C[CH2+]	C6H13+	C6H13+
C6H13+	C6H13+	30.75	40.25	C[CH+]C(C)(C)C	[CH2+]C(C)(C)CC		40.25	-40.25	30.75	36.34	-36.34	34.66	C[CH+]C(C)(C)C	[CH2+]C(C)(C)CC	C6H13+	C6H13+
C6H13+	C5H10	42.84	28.16	C[CH+]C(C)(C)C	C\C=C(/C)C	[CH3+]	28.16	-28.16	42.84	12.1	-12.1	58.9	C[CH+]C(C)(C)C	C\C=C(/C)C	C6H13+	C5H10
C6H13+	C5H10	38.38	32.62	C[CH+]C(C)(C)C	C\C=C(/C)C	[CH3+]	32.62	-32.62	38.38	16.56	-16.56	54.44	C[CH+]C(C)(C)C	C\C=C(/C)C	C6H13+	C5H10
C6H13+	C5H10	31.78	39.22	C[CH+]C(C)(C)C	C=CC(C)C	[H+]	39.22	-39.22	31.78	1.74	-1.74	69.26	C[CH+]C(C)(C)C	C=CC(C)C	C6H13+	C5H10
C6H13+	C6H13+	31.63	39.37	C[CH+]C(C)CC	C[C+](CC)CC		39.37	-39.37	31.63	42.91	-42.91	28.09	C[CH+]C(C)CC	C[C+](CC)CC	C6H13+	C6H13+
C6H13+	C6H13+	46.28	24.72	C[CH+]C(C)CC	CC(C[CH2+])CC		24.72	-24.72	46.28	21.11	-21.11	49.89	C[CH+]C(C)CC	CC(C[CH2+])CC	C6H13+	C6H13+
C6H13+	C6H13+	30.07	40.93	C[CH+]C(C)CC	[CH2+]C(CC)CC		40.93	-40.93	30.07	37.03	-37.03	33.97	C[CH+]C(C)CC	[CH2+]C(CC)CC	C6H13+	C6H13+
C6H13+	C4H8	45.23	25.77	C[CH+]C(C)CC	C\C=C/C	[CH2+]C	25.77	-25.77	45.23	10.69	-10.69	60.31	C[CH+]C(C)CC	C\C=C/C	C6H13+	C4H8
C6H13+	C4H8	40.18	30.82	C[CH+]C(C)CC	C\C=C/C	[CH2+]C	30.82	-30.82	40.18	15.74	-15.74	55.26	C[CH+]C(C)CC	C\C=C/C	C6H13+	C4H8
C6H13+	C5H10	42.9	28.1	C[CH+]C(C)CC	C\C=C/CC	[CH3+]	28.1	-28.1	42.9	9.86	-9.86	61.14	C[CH+]C(C)CC	C\C=C/CC	C6H13+	C5H10
C6H13+	C5H10	40.59	30.41	C[CH+]C(C)CC	C\C=C/CC	[CH3+]	30.41	-30.41	40.59	12.17	-12.17	58.83	C[CH+]C(C)CC	C\C=C/CC	C6H13+	C5H10
C6H13+	C6H12	35.48	35.52	C[CH+]C(C)CC	C\C=C(/C)CC	[H+]	35.52	-35.52	35.48	2.95	-2.95	68.05	C[CH+]C(C)CC	C\C=C(/C)CC	C6H13+	C6H12
C6H13+	C6H12	29.28	41.72	C[CH+]C(C)CC	C\C=C(/C)CC	[H+]	41.72	-41.72	29.28	9.15	-9.15	61.85	C[CH+]C(C)CC	C\C=C(/C)CC	C6H13+	C6H12
C6H13+	C6H12	34.73	36.27	C[CH+]C(C)CC	C=CC(C)CC	[H+]	36.27	-36.27	34.73	0.05	-0.05	70.95	C[CH+]C(C)CC	C=CC(C)CC	C6H13+	C6H12
C6H13+	C6H12	31.11	39.89	C[CH+]C(C)CC	C=CC(C)CC	[H+]	39.89	-39.89	31.11	3.67	-3.67	67.33	C[CH+]C(C)CC	C=CC(C)CC	C6H13+	C6H12
C6H11+	C6H11+	63.05	7.95	C[CH+]C1(C)CC1	C\C=C(/C)C[CH2+]		7.95	-7.95	63.05	12.26	-12.26	58.74	C[CH+]C1(C)CC1	C\C=C(/C)C[CH2+]	C6H11+	C6H11+
C6H11+	C6H11+	26.37	44.63	C[CH+]C1(C)CC1	C[C+]1CCC1C		44.63	-44.63	26.37	47.2	-47.2	23.8	C[CH+]C1(C)CC1	C[C+]1CCC1C	C6H11+	C6H11+
C6H11+	C6H11+	27.05	43.95	C[CH+]C1(C)CC1	[CH2+]C1(CC)CC1		43.95	-43.95	27.05	41.25	-41.25	29.75	C[CH+]C1(C)CC1	[CH2+]C1(CC)CC1	C6H11+	C6H11+
C6H11+	C6H11+	27.57	43.43	C[CH+]C1(C)CC1	CC1(C[CH2+])CC1		43.43	-43.43	27.57	37.04	-37.04	33.96	C[CH+]C1(C)CC1	CC1(C[CH2+])CC1	C6H11+	C6H11+
C6H11+	C5H8	31.24	39.76	C[CH+]C1(C)CC1	C\C=C1/CC1	[CH3+]	39.76	-39.76	31.24	10.24	-10.24	60.76	C[CH+]C1(C)CC1	C\C=C1/CC1	C6H11+	C5H8
C6H11+	C5H8	27.55	43.45	C[CH+]C1(C)CC1	C\C=C1/CC1	[CH3+]	43.45	-43.45	27.55	13.93	-13.93	57.07	C[CH+]C1(C)CC1	C\C=C1/CC1	C6H11+	C5H8
C6H11+	C6H10	31.06	39.94	C[CH+]C1(C)CC1	C=CC1(C)CC1	[H+]	39.94	-39.94	31.06	0.25	-0.25	70.75	C[CH+]C1(C)CC1	C=CC1(C)CC1	C6H11+	C6H10
C4H9+	C4H9+	28.86	42.14	C[CH+]CC	CCC[CH2+]		42.14	-42.14	28.86	38.52	-38.52	32.48	C[CH+]CC	CCC[CH2+]	C4H9+	C4H9+
C4H9+	C3H6	42.37	28.63	C[CH+]CC	C=CC	[CH3+]	28.63	-28.63	42.37	7.76	-7.76	63.24	C[CH+]CC	C=CC	C4H9+	C3H6
C4H9+	C4H8	35.85	35.15	C[CH+]CC	C\C=C\C	[H+]	35.15	-35.15	35.85	1.03	-1.03	69.97	C[CH+]CC	C\C=C\C	C4H9+	C4H8
C4H9+	C4H8	31.39	39.61	C[CH+]CC	C\C=C\C	[H+]	39.61	-39.61	31.39	5.49	-5.49	65.51	C[CH+]CC	C\C=C\C	C4H9+	C4H8
C4H9+	C4H8	30.91	40.09	C[CH+]CC	C=CCC	[H+]	40.09	-40.09	30.91	1.79	-1.79	69.21	C[CH+]CC	C=CCC	C4H9+	C4H8
C6H13+	C6H13+	30.44	40.56	C[CH+]CCCC	CCC[CH+]CC		40.56	-40.56	30.44	40.59	-40.59	30.41	C[CH+]CCCC	CCC[CH+]CC	C6H13+	C6H13+
C6H13+	C6H13+	53.03	17.97	C[CH+]CCCC	CCCCC[CH2+]		17.97	-17.97	53.03	13.56	-13.56	57.44	C[CH+]CCCC	CCCCC[CH2+]	C6H13+	C6H13+
C6H13+	C6H13+	28.65	42.35	C[CH+]CCCC	CCCCC[CH2+]		42.35	-42.35	28.65	37.94	-37.94	33.06	C[CH+]CCCC	CCCCC[CH2+]	C6H13+	C6H13+
C6H13+	C3H6	44.4	26.6	C[CH+]CCCC	C=CC	[CH2+]CC	26.6	-26.6	44.4	8.98	-8.98	62.02	C[CH+]CCCC	C=CC	C6H13+	C3H6
C6H13+	C3H6	40.17	30.83	C[CH+]CCCC	C=CC	[CH2+]CC	30.83	-30.83	40.17	13.21	-13.21	57.79	C[CH+]CCCC	C=CC	C6H13+	C3H6
C6H13+	C6H12	30.63	40.37	C[CH+]CCCC	CCC\C=C\C	[H+]	40.37	-40.37	30.63	4.81	-4.81	66.19	C[CH+]CCCC	CCC\C=C\C	C6H13+	C6H12
C6H13+	C6H12	31.22	39.78	C[CH+]CCCC	C=CCCCC	[H+]	39.78	-39.78	31.22	1.49	-1.49	69.51	C[CH+]CCCC	C=CCCCC	C6H13+	C6H12
C4H7+	C4H7+	42.24	28.76	C1[CH+]CC1	[CH2+]CC=C		28.76	-28.76	42.24	32.72	-32.72	38.28	C1[CH+]CC1	[CH2+]CC=C	C4H7+	C4H7+
C4H7+	C4H7+	24.43	46.57	C1[CH+]CC1	[CH2+]C1CC1		46.57	-46.57	24.43	47.55	-47.55	23.45	C1[CH+]CC1	[CH2+]C1CC1	C4H7+	C4H7+
C4H7+	C4H6	31.06	39.94	C1[CH+]CC1	C1=CCC1	[H+]	39.94	-39.94	31.06	0.64	-0.64	70.36	C1[CH+]CC1	C1=CCC1	C4H7+	C4H6
C4H7+	C4H6	28.79	42.21	C1[CH+]CC1	C1=CCC1	[H+]	42.21	-42.21	28.79	2.91	-2.91	68.09	C1[CH+]CC1	C1=CCC1	C4H7+	C4H6
C6H11+	C6H10	35.51	35.49	C1C[CH+]CCC1	C1C=CCCC1	[H+]	35.49	-35.49	35.51	0.53	-0.53	70.47	C1C[CH+]CCC1	C1C=CCCC1	C6H11+	C6H10
C6H11+	C6H10	34.42	36.58	C1C[CH+]CCC1	C1C=CCCC1	[H+]	36.58	-36.58	34.42	1.62	-1.62	69.38	C1C[CH+]CCC1	C1C=CCCC1	C6H11+	C6H10
C6H11+	C6H10	32.47	38.53	C1C[CH+]CCC1	C1C=CCCC1	[H+]	38.53	-38.53	32.47	3.57	-3.57	67.43	C1C[CH+]CCC1	C1C=CCCC1	C6H11+	C6H10
C6H13+	C6H13+	31.89	39.11	CC(C)(C)C[CH2+]	C[CH+]C(C)(C)C		39.11	-39.11	31.89	41.91	-41.91	29.09	CC(C)(C)C[CH2+]	C[CH+]C(C)(C)C	C6H13+	C6H13+
C6H13+	C6H13+	47.52	23.48	CC(C)(C)C[CH2+]	[CH2+]C(C)(C)CC		23.48	-23.48	47.52	22.39	-22.39	48.61	CC(C)(C)C[CH2+]	[CH2+]C(C)(C)CC	C6H13+	C6H13+
C6H13+	C4H9+	50.61	20.39	CC(C)(C)C[CH2+]	C[C+](C)C	C=C	20.39	-20.39	50.61	8.94	-8.94	62.06	CC(C)(C)C[CH2+]	C[C+](C)C	C6H13+	C4H9+
C6H13+	C4H9+	43.78	27.22	CC(C)(C)C[CH2+]	C[C+](C)C	C=C	27.22	-27.22	43.78	15.77	-15.77	55.23	CC(C)(C)C[CH2+]	C[C+](C)C	C6H13+	C4H9+
C6H13+	C6H12	33.76	37.24	CC(C)(C)C[CH2+]	C=CC(C)(C)C	[H+]	37.24	-37.24	33.76	2.68	-2.68	68.32	CC(C)(C)C[CH2+]	C=CC(C)(C)C	C6H13+	C6H12
C6H13+	C6H12	30.21	40.79	CC(C)(C)C[CH2+]	C=CC(C)(C)C	[H+]	40.79	-40.79	30.21	6.23	-6.23	64.77	CC(C)(C)C[CH2+]	C=CC(C)(C)C	C6H13+	C6H12
C6H11+	C6H11+	49.28	21.72	CC(C)[C+]1CC1	[CH2+]C(=C)C(C)C		21.72	-21.72	49.28	47.99	-47.99	23.01	CC(C)[C+]1CC1	[CH2+]C(=C)C(C)C	C6H11+	C6H11+
C6H11+	C6H11+	32.78	38.22	CC(C)[C+]1CC1	C[C+](C)C1CC1		38.22	-38.22	32.78	49.67	-49.67	21.33	CC(C)[C+]1CC1	C[C+](C)C1CC1	C6H11+	C6H11+
C6H11+	C6H11+	32.98	38.02	CC(C)[C+]1CC1	[CH2+]C(C)C1CC1		38.02	-38.02	32.98	41.57	-41.57	29.43	CC(C)[C+]1CC1	[CH2+]C(C)C1CC1	C6H11+	C6H11+
C6H11+	C5H8	41.92	29.08	CC(C)[C+]1CC1	C\C=C1/CC1	[CH3+]	29.08	-29.08	41.92	9.5	-9.5	61.5	CC(C)[C+]1CC1	C\C=C1/CC1	C6H11+	C5H8
C6H11+	C5H8	36.65	34.35	CC(C)[C+]1CC1	C\C=C1/CC1	[CH3+]	34.35	-34.35	36.65	14.77	-14.77	56.23	CC(C)[C+]1CC1	C\C=C1/CC1	C6H11+	C5H8
C6H11+	C6H10	31.05	39.95	CC(C)[C+]1CC1	C/C(C)=C1\CC1	[H+]	39.95	-39.95	31.05	7.38	-7.38	63.62	CC(C)[C+]1CC1	C/C(C)=C1\CC1	C6H11+	C6H10
C6H13+	C6H13+	33.26	37.74	CC(C)C[CH+]C	C[C+](C)CCC		37.74	-37.74	33.26	39.57	-39.57	31.43	CC(C)C[CH+]C	C[C+](C)CCC	C6H13+	C6H13+
C6H13+	C6H13+	30.86	40.14	CC(C)C[CH+]C	CC[CH+]C(C)C		40.14	-40.14	30.86	39.52	-39.52	31.48	CC(C)C[CH+]C	CC[CH+]C(C)C	C6H13+	C6H13+
C6H13+	C6H13+	45.72	25.28	CC(C)C[CH+]C	[CH2+]C(C)CCC		25.28	-25.28	45.72	20.89	-20.89	50.11	CC(C)C[CH+]C	[CH2+]C(C)CCC	C6H13+	C6H13+
C6H13+	C6H13+	27.71	43.29	CC(C)C[CH+]C	CC(C)CC[CH2+]		43.29	-43.29	27.71	37.53	-37.53	33.47	CC(C)C[CH+]C	CC(C)CC[CH2+]	C6H13+	C6H13+
C6H13+	C3H7+	46.59	24.41	CC(C)C[CH+]C	C[CH+]C	C=CC	24.41	-24.41	46.59	9.07	-9.07	61.93	CC(C)C[CH+]C	C[CH+]C	C6H13+	C3H7+
C6H13+	C3H7+	40.64	30.36	CC(C)C[CH+]C	C[CH+]C	C=CC	30.36	-30.36	40.64	15.02	-15.02	55.98	CC(C)C[CH+]C	C[CH+]C	C6H13+	C3H7+
C6H13+	C6H12	34.63	36.37	CC(C)C[CH+]C	C\C=C/C(C)C	[H+]	36.37	-36.37	34.63	0.06	-0.06	70.94	CC(C)C[CH+]C	C\C=C/C(C)C	C6H13+	C6H12
C6H13+	C6H12	29.63	41.37	CC(C)C[CH+]C	C\C=C/C(C)C	[H+]	41.37	-41.37	29.63	5.06	-5.06	65.94	CC(C)C[CH+]C	C\C=C/C(C)C	C6H13+	C6H12
C6H13+	C6H12	30.77	40.23	CC(C)C[CH+]C	CC(C)CC=C	[H+]	40.23	-40.23	30.77	0.1	-0.1	70.9	CC(C)C[CH+]C	CC(C)CC=C	C6H13+	C6H12
C6H11+	C6H11+	52.63	18.37	CC(C)C1[CH+]C1	[CH2+]\C=C/C(C)C		18.37	-18.37	52.63	50.72	-50.72	20.28	CC(C)C1[CH+]C1	[CH2+]\C=C/C(C)C	C6H11+	C6H11+
C6H11+	C6H11+	51.54	19.46	CC(C)C1[CH+]C1	[CH2+]\C=C/C(C)C		19.46	-19.46	51.54	51.81	-51.81	19.19	CC(C)C1[CH+]C1	[CH2+]\C=C/C(C)C	C6H11+	C6H11+
C6H11+	C6H11+	37.5	33.5	CC(C)C1[CH+]C1	C[C+](C)C1CC1		33.5	-33.5	37.5	48.42	-48.42	22.58	CC(C)C1[CH+]C1	C[C+](C)C1CC1	C6H11+	C6H11+
C6H11+	C6H11+	51.85	19.15	CC(C)C1[CH+]C1	[CH2+]C(C)C1CC1		19.15	-19.15	51.85	25.31	-25.31	45.69	CC(C)C1[CH+]C1	[CH2+]C(C)C1CC1	C6H11+	C6H11+
C6H11+	C6H11+	27.56	43.44	CC(C)C1[CH+]C1	CC(C)[C+]1CC1		43.44	-43.44	27.56	47.83	-47.83	23.17	CC(C)C1[CH+]C1	CC(C)[C+]1CC1	C6H11+	C6H11+
C6H11+	C3H7+	34.14	36.86	CC(C)C1[CH+]C1	C[CH+]C	C1=CC1	36.86	-36.86	34.14	6.18	-6.18	64.82	CC(C)C1[CH+]C1	C[CH+]C	C6H11+	C3H7+
C6H11+	C3H7+	26.13	44.87	CC(C)C1[CH+]C1	C[CH+]C	C1=CC1	44.87	-44.87	26.13	14.19	-14.19	56.81	CC(C)C1[CH+]C1	C[CH+]C	C6H11+	C3H7+
C6H13+	C6H13+	51.46	19.54	CC(C)CC[CH2+]	C[C+](C)CCC		19.54	-19.54	51.46	26.16	-26.16	44.84	CC(C)CC[CH2+]	C[C+](C)CCC	C6H13+	C6H13+
C6H13+	C6H13+	33.03	37.97	CC(C)CC[CH2+]	CC(C)C[CH+]C		37.97	-37.97	33.03	42.22	-42.22	28.78	CC(C)CC[CH2+]	CC(C)C[CH+]C	C6H13+	C6H13+
C6H13+	C6H13+	33.94	37.06	CC(C)CC[CH2+]	CC[CH+]C(C)C		37.06	-37.06	33.94	41.23	-41.23	29.77	CC(C)CC[CH2+]	CC[CH+]C(C)C	C6H13+	C6H13+
C6H13+	C6H13+	53.63	17.37	CC(C)CC[CH2+]	[CH2+]C(C)CCC		17.37	-17.37	53.63	15.05	-15.05	55.95	CC(C)CC[CH2+]	[CH2+]C(C)CCC	C6H13+	C6H13+
C6H13+	C4H9+	44.29	26.71	CC(C)CC[CH2+]	[CH2+]C(C)C	C=C	26.71	-26.71	44.29	8.96	-8.96	62.04	CC(C)CC[CH2+]	[CH2+]C(C)C	C6H13+	C4H9+
C6H13+	C4H9+	39.84	31.16	CC(C)CC[CH2+]	[CH2+]C(C)C	C=C	31.16	-31.16	39.84	13.41	-13.41	57.59	CC(C)CC[CH2+]	[CH2+]C(C)C	C6H13+	C4H9+
C6H13+	C6H12	34.88	36.12	CC(C)CC[CH2+]	C=CC(C)(C)C	[H+]	36.12	-36.12	34.88	2.14	-2.14	68.86	CC(C)CC[CH2+]	C=CC(C)(C)C	C6H13+	C6H12
C6H13+	C6H12	32.33	38.67	CC(C)CC[CH2+]	C=CC(C)(C)C	[H+]	38.67	-38.67	32.33	4.69	-4.69	66.31	CC(C)CC[CH2+]	C=CC(C)(C)C	C6H13+	C6H12
C6H13+	C6H13+	36.41	34.59	CC(C[CH2+])CC	C[C+](CC)CC		34.59	-34.59	36.41	41.44	-41.44	29.56	CC(C[CH2+])CC	C[C+](CC)CC	C6H13+	C6H13+
C6H13+	C6H13+	51.56	19.44	CC(C[CH2+])CC	C[CH+]C(C)CC		19.44	-19.44	51.56	22.41	-22.41	48.59	CC(C[CH2+])CC	C[CH+]C(C)CC	C6H13+	C6H13+
C6H13+	C6H13+	31.94	39.06	CC(C[CH2+])CC	C[CH+]C(C)CC		39.06	-39.06	31.94	42.03	-42.03	28.97	CC(C[CH2+])CC	C[CH+]C(C)CC	C6H13+	C6H13+
C6H13+	C6H13+	48.86	22.14	CC(C[CH2+])CC	[CH2+]C(CC)CC		22.14	-22.14	48.86	22.11	-22.11	48.89	CC(C[CH2+])CC	[CH2+]C(CC)CC	C6H13+	C6H13+
C6H13+	C6H13+	47.49	23.51	CC(C[CH2+])CC	[CH2+]C(CC)CC		23.51	-23.51	47.49	23.48	-23.48	47.52	CC(C[CH2+])CC	[CH2+]C(CC)CC	C6H13+	C6H13+
C6H13+	C4H9+	48.22	22.78	CC(C[CH2+])CC	C[CH+]CC	C=C	22.78	-22.78	48.22	9.43	-9.43	61.57	CC(C[CH2+])CC	C[CH+]CC	C6H13+	C4H9+
C6H13+	C4H9+	42.35	28.65	CC(C[CH2+])CC	C[CH+]CC	C=C	28.65	-28.65	42.35	15.3	-15.3	55.7	CC(C[CH2+])CC	C[CH+]CC	C6H13+	C4H9+
C6H13+	C6H12	31.59	39.41	CC(C[CH2+])CC	C=CC(C)CC	[H+]	39.41	-39.41	31.59	4.99	-4.99	66.01	CC(C[CH2+])CC	C=CC(C)CC	C6H13+	C6H12
C6H13+	C6H13+	34.58	36.42	CC[CH+]C(C)C	C[C+](C)CCC		36.42	-36.42	34.58	41.55	-41.55	29.45	CC[CH+]C(C)C	C[C+](C)CCC	C6H13+	C6H13+
C6H13+	C6H13+	32.34	38.66	CC[CH+]C(C)C	CC(C)C[CH+]C		38.66	-38.66	32.34	40.48	-40.48	30.52	CC[CH+]C(C)C	CC(C)C[CH+]C	C6H13+	C6H13+
C6H13+	C6H13+	33.1	37.9	CC[CH+]C(C)C	[CH2+]C(C)CCC		37.9	-37.9	33.1	36.47	-36.47	34.53	CC[CH+]C(C)C	[CH2+]C(C)CCC	C6H13+	C6H13+
C6H13+	C6H13+	32.13	38.87	CC[CH+]C(C)C	CC(C)CC[CH2+]		38.87	-38.87	32.13	35.01	-35.01	35.99	CC[CH+]C(C)C	CC(C)CC[CH2+]	C6H13+	C6H13+
C6H13+	C6H13+	30.71	40.29	CC[CH+]C(C)C	CC(C)CC[CH2+]		40.29	-40.29	30.71	36.43	-36.43	34.57	CC[CH+]C(C)C	CC(C)CC[CH2+]	C6H13+	C6H13+
C6H13+	C5H10	44.88	26.12	CC[CH+]C(C)C	C\C=C\CC	[CH3+]	26.12	-26.12	44.88	10.31	-10.31	60.69	CC[CH+]C(C)C	C\C=C\CC	C6H13+	C5H10
C6H13+	C5H10	41.22	29.78	CC[CH+]C(C)C	C\C=C\CC	[CH3+]	29.78	-29.78	41.22	13.97	-13.97	57.03	CC[CH+]C(C)C	C\C=C\CC	C6H13+	C5H10
C6H13+	C5H10	44.53	26.47	CC[CH+]C(C)C	C=CC(C)C	[CH3+]	26.47	-26.47	44.53	7.96	-7.96	63.04	CC[CH+]C(C)C	C=CC(C)C	C6H13+	C5H10
C6H13+	C5H10	40.16	30.84	CC[CH+]C(C)C	C=CC(C)C	[CH3+]	30.84	-30.84	40.16	12.33	-12.33	58.67	CC[CH+]C(C)C	C=CC(C)C	C6H13+	C5H10
C6H13+	C6H12	33.74	37.26	CC[CH+]C(C)C	C/C(C)=C\CC	[H+]	37.26	-37.26	33.74	6.4	-6.4	64.6	CC[CH+]C(C)C	C/C(C)=C\CC	C6H13+	C6H12
C6H13+	C6H12	29.79	41.21	CC[CH+]C(C)C	C\C=C/C(C)C	[H+]	41.21	-41.21	29.79	3.91	-3.91	67.09	CC[CH+]C(C)C	C\C=C/C(C)C	C6H13+	C6H12
C6H11+	C6H11+	27.47	43.53	CC1(C[CH2+])CC1	C[C+]1CCCC1		43.53	-43.53	27.47	69.47	-69.47	1.53	CC1(C[CH2+])CC1	C[C+]1CCCC1	C6H11+	C6H11+
C6H11+	C6H11+	32.88	38.12	CC1(C[CH2+])CC1	C[CH+]C1(C)CC1		38.12	-38.12	32.88	43.42	-43.42	27.58	CC1(C[CH2+])CC1	C[CH+]C1(C)CC1	C6H11+	C6H11+
C6H11+	C6H11+	46.7	24.3	CC1(C[CH2+])CC1	[CH2+]C1(CC)CC1		24.3	-24.3	46.7	26.87	-26.87	44.13	CC1(C[CH2+])CC1	[CH2+]C1(CC)CC1	C6H11+	C6H11+
C6H11+	C6H11+	44.78	26.22	CC1(C[CH2+])CC1	CC1(CC)[CH+]C1		26.22	-26.22	44.78	18.62	-18.62	52.38	CC1(C[CH2+])CC1	CC1(CC)[CH+]C1	C6H11+	C6H11+
C6H11+	C4H7+	42.37	28.63	CC1(C[CH2+])CC1	C[C+]1CC1	C=C	28.63	-28.63	42.37	5.47	-5.47	65.53	CC1(C[CH2+])CC1	C[C+]1CC1	C6H11+	C4H7+
C6H11+	C4H7+	35.34	35.66	CC1(C[CH2+])CC1	C[C+]1CC1	C=C	35.66	-35.66	35.34	12.5	-12.5	58.5	CC1(C[CH2+])CC1	C[C+]1CC1	C6H11+	C4H7+
C6H11+	C6H10	35.73	35.27	CC1(C[CH2+])CC1	C=CC1(C)CC1	[H+]	35.27	-35.27	35.73	2.19	-2.19	68.81	CC1(C[CH2+])CC1	C=CC1(C)CC1	C6H11+	C6H10
C6H11+	C6H10	31.44	39.56	CC1(C[CH2+])CC1	C=CC1(C)CC2	[H+]	39.56	-39.56	31.44	6.48	-6.48	64.52	CC1(C[CH2+])CC1	C=CC1(C)CC2	C6H11+	C6H10
C6H11+	C6H11+	52.22	18.78	CC1(CC)[CH+]C1	C=C[C+](C)CC		18.78	-18.78	52.22	51.97	-51.97	19.03	CC1(CC)[CH+]C1	C=C[C+](C)CC	C6H11+	C6H11+
C6H11+	C6H11+	50.39	20.61	CC1(CC)[CH+]C1	C=C[C+](C)CC		20.61	-20.61	50.39	53.8	-53.8	17.2	CC1(CC)[CH+]C1	C=C[C+](C)CC	C6H11+	C6H11+
C6H11+	C6H11+	43.92	27.08	CC1(CC)[CH+]C1	C=C[C+](C)CC		27.08	-27.08	43.92	60.27	-60.27	10.73	CC1(CC)[CH+]C1	C=C[C+](C)CC	C6H11+	C6H11+
C6H11+	C6H11+	35.74	35.26	CC1(CC)[CH+]C1	C[CH+]C1(C)CC1		35.26	-35.26	35.74	47.27	-47.27	23.73	CC1(CC)[CH+]C1	C[CH+]C1(C)CC1	C6H11+	C6H11+
C6H11+	C6H11+	33.71	37.29	CC1(CC)[CH+]C1	[CH2+]C1(CC)CC1		37.29	-37.29	33.71	46.84	-46.84	24.16	CC1(CC)[CH+]C1	[CH2+]C1(CC)CC1	C6H11+	C6H11+
C6H11+	C6H11+	51.74	19.26	CC1(CC)[CH+]C1	CC1(C[CH2+])CC1		19.26	-19.26	51.74	25.12	-25.12	45.88	CC1(CC)[CH+]C1	CC1(C[CH2+])CC1	C6H11+	C6H11+
C6H11+	C4H6	32.45	38.55	CC1(CC)[CH+]C1	CC1=CC1	[CH2+]C	38.55	-38.55	32.45	9.27	-9.27	61.73	CC1(CC)[CH+]C1	CC1=CC1	C6H11+	C4H6
C6H11+	C4H6	24.35	46.65	CC1(CC)[CH+]C1	CC1=CC1	[CH2+]C	46.65	-46.65	24.35	17.37	-17.37	53.63	CC1(CC)[CH+]C1	CC1=CC1	C6H11+	C4H6
C6H11+	C5H8	28.67	42.33	CC1(CC)[CH+]C1	CCC1=CC1	[CH3+]	42.33	-42.33	28.67	9.83	-9.83	61.17	CC1(CC)[CH+]C1	CCC1=CC1	C6H11+	C5H8
C6H11+	C6H11+	33.86	37.14	CC1[CH+]C(C)C1	C[C+]1CC(C)C1		37.14	-37.14	33.86	41.29	-41.29	29.71	CC1[CH+]C(C)C1	C[C+]1CC(C)C1	C6H11+	C6H11+
C6H11+	C6H11+	30.08	40.92	CC1[CH+]C(C)C1	C[C+]1CC(C)C1		40.92	-40.92	30.08	45.07	-45.07	25.93	CC1[CH+]C(C)C1	C[C+]1CC(C)C1	C6H11+	C6H11+
C6H11+	C6H11+	44.55	26.45	CC1[CH+]C(C)C1	[CH2+]C(C)\C=C\C		26.45	-26.45	44.55	30.15	-30.15	40.85	CC1[CH+]C(C)C1	[CH2+]C(C)\C=C\C	C6H11+	C6H11+
C6H11+	C6H11+	26.49	44.51	CC1[CH+]C(C)C1	C[CH+]C1CC1C		44.51	-44.51	26.49	44.26	-44.26	26.74	CC1[CH+]C(C)C1	C[CH+]C1CC1C	C6H11+	C6H11+
C6H11+	C6H11+	25.27	45.73	CC1[CH+]C(C)C1	C[CH+]C1CC1C		45.73	-45.73	25.27	45.48	-45.48	25.52	CC1[CH+]C(C)C1	C[CH+]C1CC1C	C6H11+	C6H11+
C6H11+	C6H11+	28.25	42.75	CC1[CH+]C(C)C1	[CH2+]C1CC(C)C1		42.75	-42.75	28.25	42.2	-42.2	28.8	CC1[CH+]C(C)C1	[CH2+]C1CC(C)C1	C6H11+	C6H11+
C6H11+	C5H8	37.78	33.22	CC1[CH+]C(C)C1	CC1C=CC1	[CH3+]	33.22	-33.22	37.78	8.78	-8.78	62.22	CC1[CH+]C(C)C1	CC1C=CC1	C6H11+	C5H8
C6H11+	C5H8	34.26	36.74	CC1[CH+]C(C)C1	CC1C=CC1	[CH3+]	36.74	-36.74	34.26	12.3	-12.3	58.7	CC1[CH+]C(C)C1	CC1C=CC1	C6H11+	C5H8
C6H11+	C6H10	30	41	CC1[CH+]C(C)C1	CC1=CC(C)C1	[H+]	41	-41	30	6.22	-6.22	64.78	CC1[CH+]C(C)C1	CC1=CC(C)C1	C6H11+	C6H10
C4H7+	C4H7+	52.39	18.61	CC1[CH+]C1	[CH2+]\C=C\C		18.61	-18.61	52.39	51.17	-51.17	19.83	CC1[CH+]C1	[CH2+]\C=C\C	C4H7+	C4H7+
C4H7+	C4H7+	50.11	20.89	CC1[CH+]C1	[CH2+]\C=C\C		20.89	-20.89	50.11	53.45	-53.45	17.55	CC1[CH+]C1	[CH2+]\C=C\C	C4H7+	C4H7+
C4H7+	C4H7+	48.12	22.88	CC1[CH+]C1	[CH2+]\C=C\C		22.88	-22.88	48.12	55.44	-55.44	15.56	CC1[CH+]C1	[CH2+]\C=C\C	C4H7+	C4H7+
C4H7+	C4H7+	31.97	39.03	CC1[CH+]C1	[CH2+]C1CC1		39.03	-39.03	31.97	48.69	-48.69	22.31	CC1[CH+]C1	[CH2+]C1CC1	C4H7+	C4H7+
C4H7+	C4H7+	26.77	44.23	CC1[CH+]C1	C[C+]1CC1		44.23	-44.23	26.77	48.23	-48.23	22.77	CC1[CH+]C1	C[C+]1CC1	C4H7+	C4H7+
C4H7+	C3H4	27.08	43.92	CC1[CH+]C1	C1=CC1	[CH3+]	43.92	-43.92	27.08	5.91	-5.91	65.09	CC1[CH+]C1	C1=CC1	C4H7+	C3H4
C6H11+	C6H11+	46.81	24.19	CC1[CH+]CC1C	C[CH+]C\C=C\C		24.19	-24.19	46.81	32.77	-32.77	38.23	CC1[CH+]CC1C	C[CH+]C\C=C\C	C6H11+	C6H11+
C6H11+	C6H11+	35.03	35.97	CC1[CH+]CC1C	C[C+]1CCC1C		35.97	-35.97	35.03	41.24	-41.24	29.76	CC1[CH+]CC1C	C[C+]1CCC1C	C6H11+	C6H11+
C6H11+	C6H11+	30.83	40.17	CC1[CH+]CC1C	C[C+]1CCC1C		40.17	-40.17	30.83	45.44	-45.44	25.56	CC1[CH+]CC1C	C[C+]1CCC1C	C6H11+	C6H11+
C6H11+	C6H11+	43.24	27.76	CC1[CH+]CC1C	C[CH+]C(C)C=C		27.76	-27.76	43.24	32.3	-32.3	38.7	CC1[CH+]CC1C	C[CH+]C(C)C=C	C6H11+	C6H11+
C6H11+	C6H11+	27.63	43.37	CC1[CH+]CC1C	C[CH+]C1CC1C		43.37	-43.37	27.63	47.54	-47.54	23.46	CC1[CH+]CC1C	C[CH+]C1CC1C	C6H11+	C6H11+
C6H11+	C6H11+	26.03	44.97	CC1[CH+]CC1C	[CH2+]C1C(C)C1C		44.97	-44.97	26.03	46.9	-46.9	24.1	CC1[CH+]CC1C	[CH2+]C1C(C)C1C	C6H11+	C6H11+
C6H11+	C6H11+	36.07	34.93	CC1[CH+]CC1C	[CH2+]C1CCC1C		34.93	-34.93	36.07	33.46	-33.46	37.54	CC1[CH+]CC1C	[CH2+]C1CCC1C	C6H11+	C6H11+
C6H11+	C6H11+	28.36	42.64	CC1[CH+]CC1C	[CH2+]C1CCC1C		42.64	-42.64	28.36	41.17	-41.17	29.83	CC1[CH+]CC1C	[CH2+]C1CCC1C	C6H11+	C6H11+
C6H11+	C5H8	38.24	32.76	CC1[CH+]CC1C	CC1C=CC1	[CH3+]	32.76	-32.76	38.24	9.73	-9.73	61.27	CC1[CH+]CC1C	CC1C=CC1	C6H11+	C5H8
C6H11+	C5H8	35.87	35.13	CC1[CH+]CC1C	CC1C=CC1	[CH3+]	35.13	-35.13	35.87	12.1	-12.1	58.9	CC1[CH+]CC1C	CC1C=CC1	C6H11+	C5H8
C6H11+	C6H10	31.34	39.66	CC1[CH+]CC1C	CC1=CCC1C	[H+]	39.66	-39.66	31.34	6.13	-6.13	64.87	CC1[CH+]CC1C	CC1=CCC1C	C6H11+	C6H10
C6H11+	C6H10	31.15	39.85	CC1[CH+]CC1C	CC1C=CC1C	[H+]	39.85	-39.85	31.15	0.87	-0.87	70.13	CC1[CH+]CC1C	CC1C=CC1C	C6H11+	C6H10
C6H11+	C6H10	28.77	42.23	CC1[CH+]CC1C	CC1C=CC1C	[H+]	42.23	-42.23	28.77	3.25	-3.25	67.75	CC1[CH+]CC1C	CC1C=CC1C	C6H11+	C6H10
C6H11+	C6H11+	36.46	34.54	CC1[CH+]CCC1	C[C+]1CCCC1		34.54	-34.54	36.46	37.96	-37.96	33.04	CC1[CH+]CCC1	C[C+]1CCCC1	C6H11+	C6H11+
C6H11+	C6H11+	32.67	38.33	CC1[CH+]CCC1	C[C+]1CCCC1		38.33	-38.33	32.67	41.75	-41.75	29.25	CC1[CH+]CCC1	C[C+]1CCCC1	C6H11+	C6H11+
C6H11+	C6H11+	30.36	40.64	CC1[CH+]CCC1	CC1C[CH+]CC1		40.64	-40.64	30.36	39.84	-39.84	31.16	CC1[CH+]CCC1	CC1C[CH+]CC1	C6H11+	C6H11+
C6H11+	C6H11+	29.36	41.64	CC1[CH+]CCC1	[CH2+]C1CCCC1		41.64	-41.64	29.36	36.31	-36.31	34.69	CC1[CH+]CCC1	[CH2+]C1CCCC1	C6H11+	C6H11+
C6H11+	C6H11+	38.33	32.67	CC1[CH+]CCC1	C=CC(C)C[CH2+]		32.67	-32.67	38.33	16.05	-16.05	54.95	CC1[CH+]CCC1	C=CC(C)C[CH2+]	C6H11+	C6H11+
C6H11+	C5H8	41.15	29.85	CC1[CH+]CCC1	C1C=CCC1	[CH3+]	29.85	-29.85	41.15	9.02	-9.02	61.98	CC1[CH+]CCC1	C1C=CCC1	C6H11+	C5H8
C6H11+	C5H8	37.2	33.8	CC1[CH+]CCC1	C1C=CCC1	[CH3+]	33.8	-33.8	37.2	12.97	-12.97	58.03	CC1[CH+]CCC1	C1C=CCC1	C6H11+	C5H8
C6H11+	C6H10	32.49	38.51	CC1[CH+]CCC1	CC1=CCCC1	[H+]	38.51	-38.51	32.49	5.76	-5.76	65.24	CC1[CH+]CCC1	CC1=CCCC1	C6H11+	C6H10
C6H11+	C6H10	34.51	36.49	CC1[CH+]CCC1	CC1C=CCC1	[H+]	36.49	-36.49	34.51	0.32	-0.32	70.68	CC1[CH+]CCC1	CC1C=CCC1	C6H11+	C6H10
C6H11+	C6H10	30.3	40.7	CC1[CH+]CCC1	CC1C=CCC1	[H+]	40.7	-40.7	30.3	4.53	-4.53	66.47	CC1[CH+]CCC1	CC1C=CCC1	C6H11+	C6H10
C6H11+	C6H11+	30.04	40.96	CC1C[CH+]CC1	CC1[CH+]CCC1		40.96	-40.96	30.04	39.77	-39.77	31.23	CC1C[CH+]CC1	CC1[CH+]CCC1	C6H11+	C6H11+
C6H11+	C6H11+	28.99	42.01	CC1C[CH+]CC1	CC1[CH+]CCC1		42.01	-42.01	28.99	40.82	-40.82	30.18	CC1C[CH+]CC1	CC1[CH+]CCC1	C6H11+	C6H11+
C6H11+	C6H11+	26.75	44.25	CC1C[CH+]CC1	CC1[CH+]CCC1		44.25	-44.25	26.75	43.06	-43.06	27.94	CC1C[CH+]CC1	CC1[CH+]CCC1	C6H11+	C6H11+
C6H11+	C6H10	33.76	37.24	CC1C[CH+]CC1	CC1C=CCC1	[H+]	37.24	-37.24	33.76	0.73	-0.73	70.27	CC1C[CH+]CC1	CC1C=CCC1	C6H11+	C6H10
C6H11+	C6H10	30.76	40.24	CC1C[CH+]CC1	CC1C=CCC1	[H+]	40.24	-40.24	30.76	3.73	-3.73	67.27	CC1C[CH+]CC1	CC1C=CCC1	C6H11+	C6H10
C6H11+	C6H10	34.13	36.87	CC1C[CH+]CC1	CC1CC=CC1	[H+]	36.87	-36.87	34.13	0.24	-0.24	70.76	CC1C[CH+]CC1	CC1CC=CC1	C6H11+	C6H10
C6H11+	C6H10	33.04	37.96	CC1C[CH+]CC1	CC1CC=CC1	[H+]	37.96	-37.96	33.04	1.33	-1.33	69.67	CC1C[CH+]CC1	CC1CC=CC1	C6H11+	C6H10
C6H11+	C6H10	29.83	41.17	CC1C[CH+]CC1	CC1CC=CC1	[H+]	41.17	-41.17	29.83	4.54	-4.54	66.46	CC1C[CH+]CC1	CC1CC=CC1	C6H11+	C6H10
C6H13+	C6H13+	32.35	38.65	CCC[CH+]CC	C[CH+]CCCC		38.65	-38.65	32.35	38.39	-38.39	32.61	CCC[CH+]CC	C[CH+]CCCC	C6H13+	C6H13+
C6H13+	C6H13+	29.75	41.25	CCC[CH+]CC	C[CH+]CCCC		41.25	-41.25	29.75	40.99	-40.99	30.01	CCC[CH+]CC	C[CH+]CCCC	C6H13+	C6H13+
C6H13+	C6H13+	46.06	24.94	CCC[CH+]CC	CCCCC[CH2+]		24.94	-24.94	46.06	20.99	-20.99	50.01	CCC[CH+]CC	CCCCC[CH2+]	C6H13+	C6H13+
C6H13+	C6H13+	29.57	41.43	CCC[CH+]CC	CCCCC[CH2+]		41.43	-41.43	29.57	37.48	-37.48	33.52	CCC[CH+]CC	CCCCC[CH2+]	C6H13+	C6H13+
C6H13+	C4H8	44.89	26.11	CCC[CH+]CC	C=CCC	[CH2+]C	26.11	-26.11	44.89	8.44	-8.44	62.56	CCC[CH+]CC	C=CCC	C6H13+	C4H8
C6H13+	C4H8	40.02	30.98	CCC[CH+]CC	C=CCC	[CH2+]C	30.98	-30.98	40.02	13.31	-13.31	57.69	CCC[CH+]CC	C=CCC	C6H13+	C4H8
C6H13+	C5H10	42.52	28.48	CCC[CH+]CC	CCCC=C	[CH3+]	28.48	-28.48	42.52	7.57	-7.57	63.43	CCC[CH+]CC	CCCC=C	C6H13+	C5H10
C6H13+	C5H10	38.48	32.52	CCC[CH+]CC	CCCC=C	[CH3+]	32.52	-32.52	38.48	11.61	-11.61	59.39	CCC[CH+]CC	CCCC=C	C6H13+	C5H10
C6H13+	C6H12	31.26	39.74	CCC[CH+]CC	CC\C=C/CC	[H+]	39.74	-39.74	31.26	4.16	-4.16	66.84	CCC[CH+]CC	CC\C=C/CC	C6H13+	C6H12
C6H13+	C6H12	31.04	39.96	CCC[CH+]CC	CCC/C=C\C	[H+]	39.96	-39.96	31.04	4.26	-4.26	66.74	CCC[CH+]CC	CCC/C=C\C	C6H13+	C6H12
C4H9+	C4H9+	32.48	38.52	CCC[CH2+]	C[CH+]CC		38.52	-38.52	32.48	42.12	-42.12	28.88	CCC[CH2+]	C[CH+]CC	C4H9+	C4H9+
C4H9+	C2H5+	44.44	26.56	CCC[CH2+]	[CH2+]C	C=C	26.56	-26.56	44.44	8.45	-8.45	62.55	CCC[CH2+]	[CH2+]C	C4H9+	C2H5+
C4H9+	C2H5+	39.7	31.3	CCC[CH2+]	[CH2+]C	C=C	31.3	-31.3	39.7	13.19	-13.19	57.81	CCC[CH2+]	[CH2+]C	C4H9+	C2H5+
C4H9+	C4H8	32	39	CCC[CH2+]	C=CCC	[H+]	39	-39	32	4.92	-4.92	66.08	CCC[CH2+]	C=CCC	C4H9+	C4H8
C6H13+	C6H13+	50.47	20.53	CCCCC[CH2+]	CCC[CH+]CC		20.53	-20.53	50.47	25.34	-25.34	45.66	CCCCC[CH2+]	CCC[CH+]CC	C6H13+	C6H13+
C6H13+	C6H13+	34.1	36.9	CCCCC[CH2+]	CCC[CH+]CC		36.9	-36.9	34.1	41.71	-41.71	29.29	CCCCC[CH2+]	CCC[CH+]CC	C6H13+	C6H13+
C6H13+	C6H13+	57.78	13.22	CCCCC[CH2+]	C[CH+]CCCC		13.22	-13.22	57.78	17.28	-17.28	53.72	CCCCC[CH2+]	C[CH+]CCCC	C6H13+	C6H13+
C6H13+	C6H13+	52.54	18.46	CCCCC[CH2+]	C[CH+]CCCC		18.46	-18.46	52.54	22.52	-22.52	48.48	CCCCC[CH2+]	C[CH+]CCCC	C6H13+	C6H13+
C6H13+	C6H13+	32.92	38.08	CCCCC[CH2+]	C[CH+]CCCC		38.08	-38.08	32.92	42.14	-42.14	28.86	CCCCC[CH2+]	C[CH+]CCCC	C6H13+	C6H13+
C6H13+	C4H9+	44.71	26.29	CCCCC[CH2+]	CCC[CH2+]	C=C	26.29	-26.29	44.71	9.31	-9.31	61.69	CCCCC[CH2+]	CCC[CH2+]	C6H13+	C4H9+
C6H13+	C4H9+	40.16	30.84	CCCCC[CH2+]	CCC[CH2+]	C=C	30.84	-30.84	40.16	13.86	-13.86	57.14	CCCCC[CH2+]	CCC[CH2+]	C6H13+	C4H9+
C6H13+	C6H12	34.71	36.29	CCCCC[CH2+]	C=CCCCC	[H+]	36.29	-36.29	34.71	2.28	-2.28	68.72	CCCCC[CH2+]	C=CCCCC	C6H13+	C6H12
C6H13+	C6H12	32.14	38.86	CCCCC[CH2+]	C=CCCCC	[H+]	38.86	-38.86	32.14	4.85	-4.85	66.15	CCCCC[CH2+]	C=CCCCC	C6H13+	C6H12
C8H17+	C8H17+	38.11	32.89	[CH2+]C(C)C(C)CCC	C[C+](C)C(C)CCC		32.89	-32.89	38.11	42.95	-42.95	28.05	[CH2+]C(C)C(C)CCC	C[C+](C)C(C)CCC	C8H17+	C8H17+
C8H17+	C8H17+	34.76	36.24	[CH2+]C(C)C(C)CCC	C[C+](C)C(C)CCC		36.24	-36.24	34.76	46.3	-46.3	24.7	[CH2+]C(C)C(C)CCC	C[C+](C)C(C)CCC	C8H17+	C8H17+
C8H17+	C8H17+	37.26	33.74	[CH2+]C(C)C(C)CCC	C[C+](CCC)C(C)C		33.74	-33.74	37.26	42.3	-42.3	28.7	[CH2+]C(C)C(C)CCC	C[C+](CCC)C(C)C	C8H17+	C8H17+
C8H17+	C8H17+	52.56	18.44	[CH2+]C(C)C(C)CCC	CC[CH+]C(C)C(C)C		18.44	-18.44	52.56	25.04	-25.04	45.96	[CH2+]C(C)C(C)CCC	CC[CH+]C(C)C(C)C	C8H17+	C8H17+
C8H17+	C8H17+	60.26	10.74	[CH2+]C(C)C(C)CCC	CC(C)C(C)C[CH+]C		10.74	-10.74	60.26	16.26	-16.26	54.74	[CH2+]C(C)C(C)CCC	CC(C)C(C)C[CH+]C	C8H17+	C8H17+
C8H17+	C8H17+	50.16	20.84	[CH2+]C(C)C(C)CCC	[CH2+]C(CCC)C(C)C		20.84	-20.84	50.16	19.26	-19.26	51.74	[CH2+]C(C)C(C)CCC	[CH2+]C(CCC)C(C)C	C8H17+	C8H17+
C8H17+	C8H17+	57.6	13.4	[CH2+]C(C)C(C)CCC	CC(C)C(C)CC[CH2+]		13.4	-13.4	57.6	11.71	-11.71	59.29	[CH2+]C(C)C(C)CCC	CC(C)C(C)CC[CH2+]	C8H17+	C8H17+
C8H17+	C7H14	22.46	48.54	[CH2+]C(C)C(C)CCC	CC1CCCC1C	[CH3+]	48.54	-48.54	22.46	46.02	-46.02	24.98	[CH2+]C(C)C(C)CCC	CC1CCCC1C	C8H17+	C7H14
C8H17+	C3H6	50.49	20.51	[CH2+]C(C)C(C)CCC	C=CC	CCC[CH+]C	20.51	-20.51	50.49	13.96	-13.96	57.04	[CH2+]C(C)C(C)CCC	C=CC	C8H17+	C3H6
C8H17+	C3H6	43.78	27.22	[CH2+]C(C)C(C)CCC	C=CC	CCC[CH+]C	27.22	-27.22	43.78	20.67	-20.67	50.33	[CH2+]C(C)C(C)CCC	C=CC	C8H17+	C3H6
C8H17+	C7H14	45.16	25.84	[CH2+]C(C)C(C)CCC	C=CC(C)CCC	[CH3+]	25.84	-25.84	45.16	12.92	-12.92	58.08	[CH2+]C(C)C(C)CCC	C=CC(C)CCC	C8H17+	C7H14
C8H17+	C7H14	42.51	28.49	[CH2+]C(C)C(C)CCC	C=CC(C)CCC	[CH3+]	28.49	-28.49	42.51	15.57	-15.57	55.43	[CH2+]C(C)C(C)CCC	C=CC(C)CCC	C8H17+	C7H14
C8H17+	C7H14	38.35	32.65	[CH2+]C(C)C(C)CCC	C=CC(C)CCC	[CH3+]	32.65	-32.65	38.35	19.73	-19.73	51.27	[CH2+]C(C)C(C)CCC	C=CC(C)CCC	C8H17+	C7H14
C8H17+	C8H16	30.47	40.53	[CH2+]C(C)C(C)CCC	C=C(C)C(C)CCC	[H+]	40.53	-40.53	30.47	9.43	-9.43	61.57	[CH2+]C(C)C(C)CCC	C=C(C)C(C)CCC	C8H17+	C8H16
C8H15+	C8H15+	66.07	4.93	[CH2+]C1C(C)C1CCC	CCC[CH+]C(C)C=C		4.93	-4.93	66.07	9.88	-9.88	61.12	[CH2+]C1C(C)C1CCC	CCC[CH+]C(C)C=C	C8H15+	C8H15+
C8H15+	C8H15+	62.96	8.04	[CH2+]C1C(C)C1CCC	CCC[CH+]C(C)C=C		8.04	-8.04	62.96	12.99	-12.99	58.01	[CH2+]C1C(C)C1CCC	CCC[CH+]C(C)C=C	C8H15+	C8H15+
C8H15+	C8H15+	47.53	23.47	[CH2+]C1C(C)C1CCC	CC[CH+]C1C(C)C1C		23.47	-23.47	47.53	27.05	-27.05	43.95	[CH2+]C1C(C)C1CCC	CC[CH+]C1C(C)C1C	C8H15+	C8H15+
C8H15+	C7H13+	64.6	6.4	[CH2+]C1C(C)C1CCC	C[CH+]C(=C)CCC		6.4	-6.4	64.6	8.24	-8.24	62.76	[CH2+]C1C(C)C1CCC	C[CH+]C(=C)CCC	C8H15+	C7H13+
C8H15+	C7H13+	61.32	9.68	[CH2+]C1C(C)C1CCC	C[CH+]C(=C)CCC		9.68	-9.68	61.32	11.52	-11.52	59.48	[CH2+]C1C(C)C1CCC	C[CH+]C(=C)CCC	C8H15+	C7H13+
C8H15+	C8H15+	24.93	46.07	[CH2+]C1C(C)C1CCC	C[CH+]C1CC1CCC		46.07	-46.07	24.93	47.76	-47.76	23.24	[CH2+]C1C(C)C1CCC	C[CH+]C1CC1CCC	C8H15+	C8H15+
C8H15+	C8H15+	24.15	46.85	[CH2+]C1C(C)C1CCC	CCC[CH+]C1CC1C		46.85	-46.85	24.15	48.11	-48.11	22.89	[CH2+]C1C(C)C1CCC	CCC[CH+]C1CC1C	C8H15+	C8H15+
C8H15+	C8H15+	52.65	18.35	[CH2+]C1C(C)C1CCC	CC1C(C)C1C[CH+]C		18.35	-18.35	52.65	19.02	-19.02	51.98	[CH2+]C1C(C)C1CCC	CC1C(C)C1C[CH+]C	C8H15+	C8H15+
C8H15+	C8H15+	23.93	47.07	[CH2+]C1C(C)C1CCC	CC1[CH+]CC1CCC		47.07	-47.07	23.93	46.31	-46.31	24.69	[CH2+]C1C(C)C1CCC	CC1[CH+]CC1CCC	C8H15+	C8H15+
C8H15+	C8H15+	24.86	46.14	[CH2+]C1C(C)C1CCC	CCCC1[CH+]CC1C		46.14	-46.14	24.86	45.3	-45.3	25.7	[CH2+]C1C(C)C1CCC	CCCC1[CH+]CC1C	C8H15+	C8H15+
C8H15+	C8H15+	50.41	20.59	[CH2+]C1C(C)C1CCC	CC1C(C)C1CC[CH2+]		20.59	-20.59	50.41	16.48	-16.48	54.52	[CH2+]C1C(C)C1CCC	CC1C(C)C1CC[CH2+]	C8H15+	C8H15+
C8H15+	C8H15+	24.73	46.27	[CH2+]C1C(C)C1CCC	C[C+]1C(C)C1CCC		46.27	-46.27	24.73	40.56	-40.56	30.44	[CH2+]C1C(C)C1CCC	C[C+]1C(C)C1CCC	C8H15+	C8H15+
C8H15+	C8H15+	27.48	43.52	[CH2+]CC1CC1CCC	CCCC1C[CH+]CC1		43.52	-43.52	27.48	69.53	-69.53	1.47	[CH2+]CC1CC1CCC	CCCC1C[CH+]CC1	C8H15+	C8H15+
C8H15+	C8H15+	28.69	42.31	[CH2+]CC1CC1CCC	CCCC1C[CH+]CC1		42.31	-42.31	28.69	68.32	-68.32	2.68	[CH2+]CC1CC1CCC	CCCC1C[CH+]CC1	C8H15+	C8H15+
C8H15+	C8H15+	30.88	40.12	[CH2+]CC1CC1CCC	CCCC1[CH+]CCC1		40.12	-40.12	30.88	65.85	-65.85	5.15	[CH2+]CC1CC1CCC	CCCC1[CH+]CCC1	C8H15+	C8H15+
C8H15+	C8H15+	29.79	41.21	[CH2+]CC1CC1CCC	CCCC1[CH+]CCC1		41.21	-41.21	29.79	66.94	-66.94	4.06	[CH2+]CC1CC1CCC	CCCC1[CH+]CCC1	C8H15+	C8H15+
C8H15+	C8H15+	33.13	37.87	[CH2+]CC1CC1CCC	C[CH+]C1CC1CCC		37.87	-37.87	33.13	45.42	-45.42	25.58	[CH2+]CC1CC1CCC	C[CH+]C1CC1CCC	C8H15+	C8H15+
C8H15+	C8H15+	56.26	14.74	[CH2+]CC1CC1CCC	[CH2+]CC1CC1CCC		14.74	-14.74	56.26	22.01	-22.01	48.99	[CH2+]CC1CC1CCC	[CH2+]CC1CC1CCC	C8H15+	C8H15+
C8H15+	C8H15+	59.86	11.14	[CH2+]CC1CC1CCC	CC[CH+]C1CC1CC		11.14	-11.14	59.86	18.13	-18.13	52.87	[CH2+]CC1CC1CCC	CC[CH+]C1CC1CC	C8H15+	C8H15+
C8H15+	C8H15+	44.48	26.52	[CH2+]CC1CC1CCC	CCC[CH+]CC1CC1		26.52	-26.52	44.48	30.86	-30.86	40.14	[CH2+]CC1CC1CCC	CCC[CH+]CC1CC1	C8H15+	C8H15+
C8H15+	C8H15+	31.8	39.2	[CH2+]CC1CC1CCC	CCC[CH+]CC1CC1		39.2	-39.2	31.8	43.54	-43.54	27.46	[CH2+]CC1CC1CCC	CCC[CH+]CC1CC1	C8H15+	C8H15+
C8H15+	C8H15+	32.55	38.45	[CH2+]CC1CC1CCC	CC[C+]1CC1CCC		38.45	-38.45	32.55	39.33	-39.33	31.67	[CH2+]CC1CC1CCC	CC[C+]1CC1CCC	C8H15+	C8H15+
C8H15+	C8H15+	50.08	20.92	[CH2+]CC1CC1CCC	CCC[C+]1CC1CC		20.92	-20.92	50.08	21.03	-21.03	49.97	[CH2+]CC1CC1CCC	CCC[C+]1CC1CC	C8H15+	C8H15+
C8H15+	C6H10	22.76	48.24	[CH2+]CC1CC1CCC	C1C2CCCC12	[CH2+]C	48.24	-48.24	22.76	49.54	-49.54	21.46	[CH2+]CC1CC1CCC	C1C2CCCC12	C8H15+	C6H10
C8H15+	C8H15+	52.86	18.14	[CH2+]CC1CC1CCC	CCC1CC1CC[CH2+]		18.14	-18.14	52.86	16.79	-16.79	54.21	[CH2+]CC1CC1CCC	CCC1CC1CC[CH2+]	C8H15+	C8H15+
C8H15+	C8H15+	42.57	28.43	[CH2+]CC1CC1CCC	[CH2+]C(CCC)C1CC1		28.43	-28.43	42.57	26.55	-26.55	44.45	[CH2+]CC1CC1CCC	[CH2+]C(CCC)C1CC1	C8H15+	C8H15+
C8H15+	C8H15+	45.32	25.68	[CH2+]CC1CC1CCC	CCC1[CH+]C1CCC		25.68	-25.68	45.32	21.32	-21.32	49.68	[CH2+]CC1CC1CCC	CCC1[CH+]C1CCC	C8H15+	C8H15+
C8H15+	C6H11+	41.36	29.64	[CH2+]CC1CC1CCC	CCCC1[CH+]C1	C=C	29.64	-29.64	41.36	6.22	-6.22	64.78	[CH2+]CC1CC1CCC	CCCC1[CH+]C1	C8H15+	C6H11+
C8H15+	C6H11+	36.52	34.48	[CH2+]CC1CC1CCC	CCCC1[CH+]C1	C=C	34.48	-34.48	36.52	11.06	-11.06	59.94	[CH2+]CC1CC1CCC	CCCC1[CH+]C1	C8H15+	C6H11+
C8H15+	C8H14	31.07	39.93	[CH2+]CC1CC1CCC	C=CC1CC1CCC	[H+]	39.93	-39.93	31.07	8.56	-8.56	62.44	[CH2+]CC1CC1CCC	C=CC1CC1CCC	C8H15+	C8H14
C8H17+	C8H17+	32.73	38.27	C[C+](C)CCCCC	CC(C)C[CH+]CCC		38.27	-38.27	32.73	37.3	-37.3	33.7	C[C+](C)CCCCC	CC(C)C[CH+]CCC	C8H17+	C8H17+
C8H17+	C8H17+	48.61	22.39	C[C+](C)CCCCC	CC(C)CC[CH+]CC		22.39	-22.39	48.61	20.78	-20.78	50.22	C[C+](C)CCCCC	CC(C)CC[CH+]CC	C8H17+	C8H17+
C8H17+	C8H17+	30	41	C[C+](C)CCCCC	CCCC[CH+]C(C)C		41	-41	30	39.01	-39.01	31.99	C[C+](C)CCCCC	CCCC[CH+]C(C)C	C8H17+	C8H17+
C8H17+	C8H17+	55.23	15.77	C[C+](C)CCCCC	CC(C)CCC[CH+]C		15.77	-15.77	55.23	13.1	-13.1	57.9	C[C+](C)CCCCC	CC(C)CCC[CH+]C	C8H17+	C8H17+
C8H17+	C8H17+	50.58	20.42	C[C+](C)CCCCC	C[C+](C)CCCCC		20.42	-20.42	50.58	12.81	-12.81	58.19	C[C+](C)CCCCC	C[C+](C)CCCCC	C8H17+	C8H17+
C8H17+	C8H17+	27.51	43.49	C[C+](C)CCCCC	[CH2+]C(C)CCCCC		43.49	-43.49	27.51	34.47	-34.47	36.53	C[C+](C)CCCCC	[CH2+]C(C)CCCCC	C8H17+	C8H17+
C8H17+	C4H8	45.72	25.28	C[C+](C)CCCCC	C=C(C)C	CCC[CH2+]	25.28	-25.28	45.72	9.17	-9.17	61.83	C[C+](C)CCCCC	C=C(C)C	C8H17+	C4H8
C8H17+	C4H8	41.71	29.29	C[C+](C)CCCCC	C=C(C)C	CCC[CH2+]	29.29	-29.29	41.71	13.18	-13.18	57.82	C[C+](C)CCCCC	C=C(C)C	C8H17+	C4H8
C8H17+	C8H16	32.61	38.39	C[C+](C)CCCCC	C/C(C)=C\CCCC	[H+]	38.39	-38.39	32.61	3.44	-3.44	67.56	C[C+](C)CCCCC	C/C(C)=C\CCCC	C8H17+	C8H16
C8H17+	C8H16	32.57	38.43	C[C+](C)CCCCC	C=C(C)CCCCC	[H+]	38.43	-38.43	32.57	0.18	-0.18	70.82	C[C+](C)CCCCC	C=C(C)CCCCC	C8H17+	C8H16
C8H15+	C8H15+	52.05	18.95	C[C+]1C(C)C1CCC	C\C=C(\C)[CH+]CCC		18.95	-18.95	52.05	46.72	-46.72	24.28	C[C+]1C(C)C1CCC	C\C=C(\C)[CH+]CCC	C8H15+	C8H15+
C8H15+	C8H15+	47.48	23.52	C[C+]1C(C)C1CCC	C\C=C(\C)[CH+]CCC		23.52	-23.52	47.48	51.29	-51.29	19.71	C[C+]1C(C)C1CCC	C\C=C(\C)[CH+]CCC	C8H15+	C8H15+
C8H15+	C8H15+	33.57	37.43	C[C+]1C(C)C1CCC	CC[CH+]C1C(C)C1C		37.43	-37.43	33.57	45.72	-45.72	25.28	C[C+]1C(C)C1CCC	CC[CH+]C1C(C)C1C	C8H15+	C8H15+
C8H15+	C8H15+	30.33	40.67	C[C+]1C(C)C1CCC	[CH2+]C1C(C)C1CCC		40.67	-40.67	30.33	46.51	-46.51	24.49	C[C+]1C(C)C1CCC	[CH2+]C1C(C)C1CCC	C8H15+	C8H15+
C8H15+	C8H15+	28.71	42.29	C[C+]1C(C)C1CCC	[CH2+]C1C(C)C1CCC		42.29	-42.29	28.71	48.13	-48.13	22.87	C[C+]1C(C)C1CCC	[CH2+]C1C(C)C1CCC	C8H15+	C8H15+
C8H15+	C8H15+	50.66	20.34	C[C+]1C(C)C1CCC	CC1C(C)C1C[CH+]C		20.34	-20.34	50.66	25.2	-25.2	45.8	C[C+]1C(C)C1CCC	CC1C(C)C1C[CH+]C	C8H15+	C8H15+
C8H15+	C8H15+	55.62	15.38	C[C+]1C(C)C1CCC	CC1C(C)C1CC[CH2+]		15.38	-15.38	55.62	17.1	-17.1	53.9	C[C+]1C(C)C1CCC	CC1C(C)C1CC[CH2+]	C8H15+	C8H15+
C8H15+	C8H14+2	26.34	44.66	C[C+]1C(C)C1CCC	[CH2+]CC[C+]1C(C)C1C		44.66	-44.66	26.34	45.13	-45.13	25.87	C[C+]1C(C)C1CCC	[CH2+]CC[C+]1C(C)C1C	C8H15+	C8H14+2
C8H15+	C5H8	31.74	39.26	C[C+]1C(C)C1CCC	CC1=CC1C	[CH2+]CC	39.26	-39.26	31.74	7.04	-7.04	63.96	C[C+]1C(C)C1CCC	CC1=CC1C	C8H15+	C5H8
C8H15+	C7H12	28.86	42.14	C[C+]1C(C)C1CCC	CC1=CC1CCC	[CH3+]	42.14	-42.14	28.86	6.12	-6.12	64.88	C[C+]1C(C)C1CCC	CC1=CC1CCC	C8H15+	C7H12
C8H15+	C7H12	27.39	43.61	C[C+]1C(C)C1CCC	CC1=CC1CCC	[CH3+]	43.61	-43.61	27.39	7.59	-7.59	63.41	C[C+]1C(C)C1CCC	CC1=CC1CCC	C8H15+	C7H12
C8H15+	C8H14	32.28	38.72	C[C+]1C(C)C1CCC	C=C1C(C)C1CCC	[H+]	38.72	-38.72	32.28	-0.23	0.23	71.23	C[C+]1C(C)C1CCC	C=C1C(C)C1CCC	C8H15+	C8H14
C8H15+	C8H14	29.61	41.39	C[C+]1C(C)C1CCC	C=C1C(C)C1CCC	[H+]	41.39	-41.39	29.61	2.44	-2.44	68.56	C[C+]1C(C)C1CCC	C=C1C(C)C1CCC	C8H15+	C8H14
C8H15+	C8H15+	65.53	5.47	C[CH+]C1CC1CCC	CCC[CH+]C\C=C\C		5.47	-5.47	65.53	12.29	-12.29	58.71	C[CH+]C1CC1CCC	CCC[CH+]C\C=C\C	C8H15+	C8H15+
C8H15+	C8H15+	60.32	10.68	C[CH+]C1CC1CCC	CCC[CH+]C\C=C\C		10.68	-10.68	60.32	17.5	-17.5	53.5	C[CH+]C1CC1CCC	CCC[CH+]C\C=C\C	C8H15+	C8H15+
C8H15+	C8H15+	64	7	C[CH+]C1CC1CCC	[CH2+]C(\C=C\C)CCC		7	-7	64	7.75	-7.75	63.25	C[CH+]C1CC1CCC	[CH2+]C(\C=C\C)CCC	C8H15+	C8H15+
C8H15+	C8H15+	61.53	9.47	C[CH+]C1CC1CCC	[CH2+]C(\C=C\C)CCC		9.47	-9.47	61.53	10.22	-10.22	60.78	C[CH+]C1CC1CCC	[CH2+]C(\C=C\C)CCC	C8H15+	C8H15+
C8H15+	C8H15+	47.06	23.94	C[CH+]C1CC1CCC	CC[CH+]C1CC1CC		23.94	-23.94	47.06	23.01	-23.01	47.99	C[CH+]C1CC1CCC	CC[CH+]C1CC1CC	C8H15+	C8H15+
C8H15+	C8H15+	23.19	47.81	C[CH+]C1CC1CCC	CC1[CH+]CC1CCC		47.81	-47.81	23.19	46.24	-46.24	24.76	C[CH+]C1CC1CCC	CC1[CH+]CC1CCC	C8H15+	C8H15+
C8H15+	C8H15+	24.04	46.96	C[CH+]C1CC1CCC	CC1[CH+]C(CCC)C1		46.96	-46.96	24.04	45.08	-45.08	25.92	C[CH+]C1CC1CCC	CC1[CH+]C(CCC)C1	C8H15+	C8H15+
C8H15+	C8H15+	51.19	19.81	C[CH+]C1CC1CCC	C[CH+]CC1CC1CC		19.81	-19.81	51.19	17.51	-17.51	53.49	C[CH+]C1CC1CCC	C[CH+]CC1CC1CC	C8H15+	C8H15+
C8H15+	C8H15+	26.45	44.55	C[CH+]C1CC1CCC	[CH2+]CC1CC1CCC		44.55	-44.55	26.45	37.48	-37.48	33.52	C[CH+]C1CC1CCC	[CH2+]CC1CC1CCC	C8H15+	C8H15+
C8H15+	C8H15+	49.49	21.51	C[CH+]C1CC1CCC	CCC1CC1CC[CH2+]		21.51	-21.51	49.49	14.38	-14.38	56.62	C[CH+]C1CC1CCC	CCC1CC1CC[CH2+]	C8H15+	C8H15+
C8H15+	C8H14	31.16	39.84	C[CH+]C1CC1CCC	C=CC1CC1CCC	[H+]	39.84	-39.84	31.16	0.53	-0.53	70.47	C[CH+]C1CC1CCC	C=CC1CC1CCC	C8H15+	C8H14
C8H17+	C8H17+	34.04	36.96	CC(C)C[CH+]CCC	C[C+](C)CCCCC		36.96	-36.96	34.04	38.29	-38.29	32.71	CC(C)C[CH+]CCC	C[C+](C)CCCCC	C8H17+	C8H17+
C8H17+	C8H17+	31.02	39.98	CC(C)C[CH+]CCC	CC(C)CC[CH+]CC		39.98	-39.98	31.02	40.09	-40.09	30.91	CC(C)C[CH+]CCC	CC(C)CC[CH+]CC	C8H17+	C8H17+
C8H17+	C8H17+	29.41	41.59	CC(C)C[CH+]CCC	CCCC[CH+]C(C)C		41.59	-41.59	29.41	41.53	-41.53	29.47	CC(C)C[CH+]CCC	CCCC[CH+]C(C)C	C8H17+	C8H17+
C8H17+	C8H17+	32.25	38.75	CC(C)C[CH+]CCC	CC(C)CCC[CH+]C		38.75	-38.75	32.25	38.59	-38.59	32.41	CC(C)C[CH+]CCC	CC(C)CCC[CH+]C	C8H17+	C8H17+
C8H17+	C8H17+	45.75	25.25	CC(C)C[CH+]CCC	CC(C)CCCC[CH2+]		25.25	-25.25	45.75	21.96	-21.96	49.04	CC(C)C[CH+]CCC	CC(C)CCCC[CH2+]	C8H17+	C8H17+
C8H17+	C8H17+	46.37	24.63	CC(C)C[CH+]CCC	[CH2+]C(C)CCCCC		24.63	-24.63	46.37	20.84	-20.84	50.16	CC(C)C[CH+]CCC	[CH2+]C(C)CCCCC	C8H17+	C8H17+
C8H17+	C3H7+	47.62	23.38	CC(C)C[CH+]CCC	C[CH+]C	CCCC=C	23.38	-23.38	47.62	8.89	-8.89	62.11	CC(C)C[CH+]CCC	C[CH+]C	C8H17+	C3H7+
C8H17+	C3H7+	41.91	29.09	CC(C)C[CH+]CCC	C[CH+]C	CCCC=C	29.09	-29.09	41.91	14.6	-14.6	56.4	CC(C)C[CH+]CCC	C[CH+]C	C8H17+	C3H7+
C8H17+	C6H12	44.92	26.08	CC(C)C[CH+]CCC	CC(C)CC=C	[CH2+]C	26.08	-26.08	44.92	8.64	-8.64	62.36	CC(C)C[CH+]CCC	CC(C)CC=C	C8H17+	C6H12
C8H17+	C6H12	40.58	30.42	CC(C)C[CH+]CCC	CC(C)CC=C	[CH2+]C	30.42	-30.42	40.58	12.98	-12.98	58.02	CC(C)C[CH+]CCC	CC(C)CC=C	C8H17+	C6H12
C8H17+	C8H16	35.04	35.96	CC(C)C[CH+]CCC	CCC\C=C/C(C)C	[H+]	35.96	-35.96	35.04	0.45	-0.45	70.55	CC(C)C[CH+]CCC	CCC\C=C/C(C)C	C8H17+	C8H16
C8H17+	C8H16	30.55	40.45	CC(C)C[CH+]CCC	CCC\C=C/C(C)C	[H+]	40.45	-40.45	30.55	4.94	-4.94	66.06	CC(C)C[CH+]CCC	CCC\C=C/C(C)C	C8H17+	C8H16
C8H17+	C8H16	35.98	35.02	CC(C)C[CH+]CCC	CC(C)C/C=C\CC	[H+]	35.02	-35.02	35.98	1.54	-1.54	69.46	CC(C)C[CH+]CCC	CC(C)C/C=C\CC	C8H17+	C8H16
C8H17+	C8H16	32.73	38.27	CC(C)C[CH+]CCC	CC(C)C/C=C\CC	[H+]	38.27	-38.27	32.73	4.79	-4.79	66.21	CC(C)C[CH+]CCC	CC(C)C/C=C\CC	C8H17+	C8H16
C8H17+	C8H17+	59.35	11.65	CC(C)CCC[CH+]C	C[C+](C)CCCCC		11.65	-11.65	59.35	15.66	-15.66	55.34	CC(C)CCC[CH+]C	C[C+](C)CCCCC	C8H17+	C8H17+
C8H17+	C8H17+	35.39	35.61	CC(C)CCC[CH+]C	CC(C)C[CH+]CCC		35.61	-35.61	35.39	39.26	-39.26	31.74	CC(C)CCC[CH+]C	CC(C)C[CH+]CCC	C8H17+	C8H17+
C8H17+	C8H17+	52.16	18.84	CC(C)CCC[CH+]C	CCCC[CH+]C(C)C		18.84	-18.84	52.16	22.29	-22.29	48.71	CC(C)CCC[CH+]C	CCCC[CH+]C(C)C	C8H17+	C8H17+
C8H17+	C8H17+	51.1	19.9	CC(C)CCC[CH+]C	CCCC[CH+]C(C)C		19.9	-19.9	51.1	23.35	-23.35	47.65	CC(C)CCC[CH+]C	CCCC[CH+]C(C)C	C8H17+	C8H17+
C8H17+	C8H17+	32.89	38.11	CC(C)CCC[CH+]C	CC(C)CC[CH+]CC		38.11	-38.11	32.89	41.43	-41.43	29.57	CC(C)CCC[CH+]C	CC(C)CC[CH+]CC	C8H17+	C8H17+
C8H17+	C8H17+	30.35	40.65	CC(C)CCC[CH+]C	CC(C)CCCC[CH2+]		40.65	-40.65	30.35	38.94	-38.94	32.06	CC(C)CCC[CH+]C	CC(C)CCCC[CH2+]	C8H17+	C8H17+
C8H17+	C8H17+	51.51	19.49	CC(C)CCC[CH+]C	[CH2+]C(C)CCCCC		19.49	-19.49	51.51	15.4	-15.4	55.6	CC(C)CCC[CH+]C	[CH2+]C(C)CCCCC	C8H17+	C8H17+
C8H17+	C5H11+	47.44	23.56	CC(C)CCC[CH+]C	CC(C)C[CH2+]	C=CC	23.56	-23.56	47.44	9.73	-9.73	61.27	CC(C)CCC[CH+]C	CC(C)C[CH2+]	C8H17+	C5H11+
C8H17+	C5H11+	40.76	30.24	CC(C)CCC[CH+]C	CC(C)C[CH2+]	C=CC	30.24	-30.24	40.76	16.41	-16.41	54.59	CC(C)CCC[CH+]C	CC(C)C[CH2+]	C8H17+	C5H11+
C8H17+	C8H16	32.27	38.73	CC(C)CCC[CH+]C	CC(C)CC/C=C\C	[H+]	38.73	-38.73	32.27	5.78	-5.78	65.22	CC(C)CCC[CH+]C	CC(C)CC/C=C\C	C8H17+	C8H16
C8H17+	C8H16	32.01	38.99	CC(C)CCC[CH+]C	CC(C)CCCC=C	[H+]	38.99	-38.99	32.01	3.78	-3.78	67.22	CC(C)CCC[CH+]C	CC(C)CCCC=C	C8H17+	C8H16
C8H17+	C8H17+	57.51	13.49	CC(C)CCCC[CH2+]	C[C+](C)CCCCC		13.49	-13.49	57.51	19.24	-19.24	51.76	CC(C)CCCC[CH2+]	C[C+](C)CCCCC	C8H17+	C8H17+
C8H17+	C8H17+	50.91	20.09	CC(C)CCCC[CH2+]	CC(C)C[CH+]CCC		20.09	-20.09	50.91	25.24	-25.24	45.76	CC(C)CCCC[CH2+]	CC(C)C[CH+]CCC	C8H17+	C8H17+
C8H17+	C8H17+	34.16	36.84	CC(C)CCCC[CH2+]	CC(C)CC[CH+]CC		36.84	-36.84	34.16	41.88	-41.88	29.12	CC(C)CCCC[CH2+]	CC(C)CC[CH+]CC	C8H17+	C8H17+
C8H17+	C8H17+	32.96	38.04	CC(C)CCCC[CH2+]	CC(C)CCC[CH+]C		38.04	-38.04	32.96	42.21	-42.21	28.79	CC(C)CCCC[CH2+]	CC(C)CCC[CH+]C	C8H17+	C8H17+
C8H17+	C8H17+	58.23	12.77	CC(C)CCCC[CH2+]	CCCC[CH+]C(C)C		12.77	-12.77	58.23	16.69	-16.69	54.31	CC(C)CCCC[CH2+]	CCCC[CH+]C(C)C	C8H17+	C8H17+
C8H17+	C3H7+	22.75	48.25	CC(C)CCCC[CH2+]	C[CH+]C	C1CCCC1	48.25	-48.25	22.75	49.49	-49.49	21.51	CC(C)CCCC[CH2+]	C[CH+]C	C8H17+	C3H7+
C8H17+	C8H17+	49.76	21.24	CC(C)CCCC[CH2+]	[CH2+]C(C)CCCCC		21.24	-21.24	49.76	17.12	-17.12	53.88	CC(C)CCCC[CH2+]	[CH2+]C(C)CCCCC	C8H17+	C8H17+
C8H17+	C6H13+	45.59	25.41	CC(C)CCCC[CH2+]	CC(C)CC[CH2+]	C=C	25.41	-25.41	45.59	8.6	-8.6	62.4	CC(C)CCCC[CH2+]	CC(C)CC[CH2+]	C8H17+	C6H13+
C8H17+	C6H13+	40.11	30.89	CC(C)CCCC[CH2+]	CC(C)CC[CH2+]	C=C	30.89	-30.89	40.11	14.08	-14.08	56.92	CC(C)CCCC[CH2+]	CC(C)CC[CH2+]	C8H17+	C6H13+
C8H17+	C8H16	32.14	38.86	CC(C)CCCC[CH2+]	CC(C)CCCC=C	[H+]	38.86	-38.86	32.14	4.89	-4.89	66.11	CC(C)CCCC[CH2+]	CC(C)CCCC=C	C8H17+	C8H16
C8H17+	C8H17+	35.37	35.63	CC(C[CH+]C)CCC	C[C+](CCC)CCC		35.63	-35.63	35.37	39.21	-39.21	31.79	CC(C[CH+]C)CCC	C[C+](CCC)CCC	C8H17+	C8H17+
C8H17+	C8H17+	49.91	21.09	CC(C[CH+]C)CCC	CC[CH+]C(C)CCC		21.09	-21.09	49.91	20.76	-20.76	50.24	CC(C[CH+]C)CCC	CC[CH+]C(C)CCC	C8H17+	C8H17+
C8H17+	C8H17+	30.9	40.1	CC(C[CH+]C)CCC	CC[CH+]C(C)CCC		40.1	-40.1	30.9	39.77	-39.77	31.23	CC(C[CH+]C)CCC	CC[CH+]C(C)CCC	C8H17+	C8H17+
C8H17+	C8H17+	47.44	23.56	CC(C[CH+]C)CCC	[CH2+]C(CCC)CCC		23.56	-23.56	47.44	20.43	-20.43	50.57	CC(C[CH+]C)CCC	[CH2+]C(CCC)CCC	C8H17+	C8H17+
C8H17+	C8H17+	52.65	18.35	CC(C[CH+]C)CCC	CC(CC[CH2+])CCC		18.35	-18.35	52.65	13	-13	58	CC(C[CH+]C)CCC	CC(CC[CH2+])CCC	C8H17+	C8H17+
C8H17+	C8H17+	28.45	42.55	CC(C[CH+]C)CCC	CC(CC[CH2+])CCC		42.55	-42.55	28.45	37.2	-37.2	33.8	CC(C[CH+]C)CCC	CC(CC[CH2+])CCC	C8H17+	C8H17+
C8H17+	C5H11+	48.85	22.15	CC(C[CH+]C)CCC	CCC[CH+]C	C=CC	22.15	-22.15	48.85	9.17	-9.17	61.83	CC(C[CH+]C)CCC	CCC[CH+]C	C8H17+	C5H11+
C8H17+	C5H11+	43.06	27.94	CC(C[CH+]C)CCC	CCC[CH+]C	C=CC	27.94	-27.94	43.06	14.96	-14.96	56.04	CC(C[CH+]C)CCC	CCC[CH+]C	C8H17+	C5H11+
C8H17+	C8H16	27.95	43.05	CC(C[CH+]C)CCC	C\C=C\C(C)CCC	[H+]	43.05	-43.05	27.95	4.44	-4.44	66.56	CC(C[CH+]C)CCC	C\C=C\C(C)CCC	C8H17+	C8H16
C8H17+	C8H16	31.55	39.45	CC(C[CH+]C)CCC	CC(CC=C)CCC	[H+]	39.45	-39.45	31.55	1.71	-1.71	69.29	CC(C[CH+]C)CCC	CC(CC=C)CCC	C8H17+	C8H16
C8H15+	C8H15+	50.33	20.67	CC[C+]1CC1CCC	C=C(CC)[CH+]CCC		20.67	-20.67	50.33	48.4	-48.4	22.6	CC[C+]1CC1CCC	C=C(CC)[CH+]CCC	C8H15+	C8H15+
C8H15+	C8H15+	49.19	21.81	CC[C+]1CC1CCC	C=C(CC)[CH+]CCC		21.81	-21.81	49.19	49.54	-49.54	21.46	CC[C+]1CC1CCC	C=C(CC)[CH+]CCC	C8H15+	C8H15+
C8H15+	C8H15+	34.94	36.06	CC[C+]1CC1CCC	CC[CH+]C1CC1CC		36.06	-36.06	34.94	46.2	-46.2	24.8	CC[C+]1CC1CCC	CC[CH+]C1CC1CC	C8H15+	C8H15+
C8H15+	C8H15+	29.9	41.1	CC[C+]1CC1CCC	C[CH+]C1CC1CCC		41.1	-41.1	29.9	50.06	-50.06	20.94	CC[C+]1CC1CCC	C[CH+]C1CC1CCC	C8H15+	C8H15+
C8H15+	C8H15+	52.11	18.89	CC[C+]1CC1CCC	C[CH+]CC1CC1CC		18.89	-18.89	52.11	25.66	-25.66	45.34	CC[C+]1CC1CCC	C[CH+]CC1CC1CC	C8H15+	C8H15+
C8H15+	C8H15+	56.72	14.28	CC[C+]1CC1CCC	CCC1CC1CC[CH2+]		14.28	-14.28	56.72	17.85	-17.85	53.15	CC[C+]1CC1CCC	CCC1CC1CC[CH2+]	C8H15+	C8H15+
C8H15+	C8H15+	32.16	38.84	CC[C+]1CC1CCC	[CH2+]CC1CC1CCC		38.84	-38.84	32.16	40.74	-40.74	30.26	CC[C+]1CC1CCC	[CH2+]CC1CC1CCC	C8H15+	C8H15+
C8H15+	C8H15+	25	46	CC[C+]1CC1CCC	CCC[C+]1CC1CC		46	-46	25	46.68	-46.68	24.32	CC[C+]1CC1CCC	CCC[C+]1CC1CC	C8H15+	C8H15+
C8H15+	C7H12	41.74	29.26	CC[C+]1CC1CCC	C=C1CC1CCC	[CH3+]	29.26	-29.26	41.74	7.34	-7.34	63.66	CC[C+]1CC1CCC	C=C1CC1CCC	C8H15+	C7H12
C8H15+	C7H12	37.53	33.47	CC[C+]1CC1CCC	C=C1CC1CCC	[CH3+]	33.47	-33.47	37.53	11.55	-11.55	59.45	CC[C+]1CC1CCC	C=C1CC1CCC	C8H15+	C7H12
C8H15+	C5H8	31.66	39.34	CC[C+]1CC1CCC	CCC1=CC1	[CH2+]CC	39.34	-39.34	31.66	7.17	-7.17	63.83	CC[C+]1CC1CCC	CCC1=CC1	C8H15+	C5H8
C8H15+	C5H8	25.42	45.58	CC[C+]1CC1CCC	CCC1=CC1	[CH2+]CC	45.58	-45.58	25.42	13.41	-13.41	57.59	CC[C+]1CC1CCC	CCC1=CC1	C8H15+	C5H8
C8H15+	C8H14	34.77	36.23	CC[C+]1CC1CCC	C\C=C1\CC1CCC	[H+]	36.23	-36.23	34.77	0.65	-0.65	70.35	CC[C+]1CC1CCC	C\C=C1\CC1CCC	C8H15+	C8H14
C8H15+	C8H14	30.74	40.26	CC[C+]1CC1CCC	C\C=C1\CC1CCC	[H+]	40.26	-40.26	30.74	4.68	-4.68	66.32	CC[C+]1CC1CCC	C\C=C1\CC1CCC	C8H15+	C8H14
C8H15+	C8H15+	66.33	4.67	CC[CH+]C1C(C)C1C	C[CH+]C(C)\C=C\CC		4.67	-4.67	66.33	10.27	-10.27	60.73	CC[CH+]C1C(C)C1C	C[CH+]C(C)\C=C\CC	C8H15+	C8H15+
C8H15+	C8H15+	65.07	5.93	CC[CH+]C1C(C)C1C	C[CH+]C(C)\C=C\CC		5.93	-5.93	65.07	11.53	-11.53	59.47	CC[CH+]C1C(C)C1C	C[CH+]C(C)\C=C\CC	C8H15+	C8H15+
C8H15+	C8H15+	62	9	CC[CH+]C1C(C)C1C	C[CH+]C(C)\C=C\CC		9	-9	62	14.6	-14.6	56.4	CC[CH+]C1C(C)C1C	C[CH+]C(C)\C=C\CC	C8H15+	C8H15+
C8H15+	C8H15+	25.14	45.86	CC[CH+]C1C(C)C1C	CC1[CH+]C(CC)C1C		45.86	-45.86	25.14	44.36	-44.36	26.64	CC[CH+]C1C(C)C1C	CC1[CH+]C(CC)C1C	C8H15+	C8H15+
C8H15+	C8H15+	24.11	46.89	CC[CH+]C1C(C)C1C	CC1[CH+]C(CC)C1C		46.89	-46.89	24.11	45.39	-45.39	25.61	CC[CH+]C1C(C)C1C	CC1[CH+]C(CC)C1C	C8H15+	C8H15+
C8H15+	C8H15+	28.79	42.21	CC[CH+]C1C(C)C1C	CC1C(C)C1C[CH+]C		42.21	-42.21	28.79	39.46	-39.46	31.54	CC[CH+]C1C(C)C1C	CC1C(C)C1C[CH+]C	C8H15+	C8H15+
C8H15+	C8H15+	44.58	26.42	CC[CH+]C1C(C)C1C	[CH2+]C1C(C)C1CCC		26.42	-26.42	44.58	21.33	-21.33	49.67	CC[CH+]C1C(C)C1C	[CH2+]C1C(C)C1CCC	C8H15+	C8H15+
C8H15+	C8H15+	40.84	30.16	CC[CH+]C1C(C)C1C	[CH2+]C1C(C)C1CCC		30.16	-30.16	40.84	25.07	-25.07	45.93	CC[CH+]C1C(C)C1C	[CH2+]C1C(C)C1CCC	C8H15+	C8H15+
C8H15+	C8H15+	27.61	43.39	CC[CH+]C1C(C)C1C	CC1C(C)C1CC[CH2+]		43.39	-43.39	27.61	36.33	-36.33	34.67	CC[CH+]C1C(C)C1C	CC1C(C)C1CC[CH2+]	C8H15+	C8H15+
C8H15+	C8H15+	24.59	46.41	CC[CH+]C1C(C)C1C	C[C+]1C(C)C1CCC		46.41	-46.41	24.59	37.36	-37.36	33.64	CC[CH+]C1C(C)C1C	C[C+]1C(C)C1CCC	C8H15+	C8H15+
C8H15+	C7H12	41.56	29.44	CC[CH+]C1C(C)C1C	CC1C(C)C1C=C	[CH3+]	29.44	-29.44	41.56	7.08	-7.08	63.92	CC[CH+]C1C(C)C1C	CC1C(C)C1C=C	C8H15+	C7H12
C8H15+	C7H12	39.21	31.79	CC[CH+]C1C(C)C1C	CC1C(C)C1C=C	[CH3+]	31.79	-31.79	39.21	9.43	-9.43	61.57	CC[CH+]C1C(C)C1C	CC1C(C)C1C=C	C8H15+	C7H12
C8H15+	C8H14	31.15	39.85	CC[CH+]C1C(C)C1C	CC1C(C)C1\C=C\C	[H+]	39.85	-39.85	31.15	2.74	-2.74	68.26	CC[CH+]C1C(C)C1C	CC1C(C)C1\C=C\C	C8H15+	C8H14
C8H15+	C8H15+	66.13	4.87	CC[CH+]C1CC1(C)C	C[C+](C)C\C=C/CC		4.87	-4.87	66.13	10.75	-10.75	60.25	CC[CH+]C1CC1(C)C	C[C+](C)C\C=C/CC	C8H15+	C8H15+
C8H15+	C8H15+	60.21	10.79	CC[CH+]C1CC1(C)C	C[C+](C)C\C=C/CC		10.79	-10.79	60.21	16.67	-16.67	54.33	CC[CH+]C1CC1(C)C	C[C+](C)C\C=C/CC	C8H15+	C8H15+
C8H15+	C8H16	64.36	6.64	CC[CH+]C1CC1(C)C	CC\C=C\C(C)(C)C		6.64	-6.64	64.36	7.13	-7.13	63.87	CC[CH+]C1CC1(C)C	CC\C=C\C(C)(C)C	C8H15+	C8H16
C8H15+	C8H16	61.84	9.16	CC[CH+]C1CC1(C)C	CC\C=C\C(C)(C)C		9.16	-9.16	61.84	9.65	-9.65	61.35	CC[CH+]C1CC1(C)C	CC\C=C\C(C)(C)C	C8H15+	C8H16
C8H15+	C8H15+	24.49	46.51	CC[CH+]C1CC1(C)C	CCC1[CH+]C(C)(C)C1		46.51	-46.51	24.49	43.9	-43.9	27.1	CC[CH+]C1CC1(C)C	CCC1[CH+]C(C)(C)C1	C8H15+	C8H15+
C8H15+	C8H15+	28.41	42.59	CC[CH+]C1CC1(C)C	C[CH+]CC1CC1(C)C		42.59	-42.59	28.41	39.37	-39.37	31.63	CC[CH+]C1CC1(C)C	C[CH+]CC1CC1(C)C	C8H15+	C8H15+
C8H15+	C8H15+	44.71	26.29	CC[CH+]C1CC1(C)C	CCCC1CC1([CH2+])C		26.29	-26.29	44.71	22.68	-22.68	48.32	CC[CH+]C1CC1(C)C	CCCC1CC1([CH2+])C	C8H15+	C8H15+
C8H15+	C8H15+	27.18	43.82	CC[CH+]C1CC1(C)C	[CH2+]CCC1CC1(C)C		43.82	-43.82	27.18	36.36	-36.36	34.64	CC[CH+]C1CC1(C)C	[CH2+]CCC1CC1(C)C	C8H15+	C8H15+
C8H15+	C7H12	40.99	30.01	CC[CH+]C1CC1(C)C	C=CC1CC1(C)C	[CH3+]	30.01	-30.01	40.99	7.13	-7.13	63.87	CC[CH+]C1CC1(C)C	C=CC1CC1(C)C	C8H15+	C7H12
C8H15+	C7H12	38.28	32.72	CC[CH+]C1CC1(C)C	C=CC1CC1(C)C	[CH3+]	32.72	-32.72	38.28	9.84	-9.84	61.16	CC[CH+]C1CC1(C)C	C=CC1CC1(C)C	C8H15+	C7H12
C8H15+	C8H14	30.17	40.83	CC[CH+]C1CC1(C)C	C\C=C\C1CC1(C)C		40.83	-40.83	30.17	3.21	-3.21	67.79	CC[CH+]C1CC1(C)C	C\C=C\C1CC1(C)C	C8H15+	C8H14
C8H15+	C8H15+	65.96	5.04	CC[CH+]C1CC1CC	CC[CH+]C\C=C/CC		5.04	-5.04	65.96	9.99	-9.99	61.01	CC[CH+]C1CC1CC	CC[CH+]C\C=C/CC	C8H15+	C8H15+
C8H15+	C8H15+	64.24	6.76	CC[CH+]C1CC1CC	CC[CH+]C\C=C/CC		6.76	-6.76	64.24	11.71	-11.71	59.29	CC[CH+]C1CC1CC	CC[CH+]C\C=C/CC	C8H15+	C8H15+
C8H15+	C8H15+	60.75	10.25	CC[CH+]C1CC1CC	CC[CH+]C\C=C/CC		10.25	-10.25	60.75	15.2	-15.2	55.8	CC[CH+]C1CC1CC	CC[CH+]C\C=C/CC	C8H15+	C8H15+
C8H15+	C8H15+	64.51	6.49	CC[CH+]C1CC1CC	[CH2+]C(\C=C\CC)CC		6.49	-6.49	64.51	7.79	-7.79	63.21	CC[CH+]C1CC1CC	[CH2+]C(\C=C\CC)CC	C8H15+	C8H15+
C8H15+	C8H15+	62.14	8.86	CC[CH+]C1CC1CC	[CH2+]C(\C=C\CC)CC		8.86	-8.86	62.14	10.16	-10.16	60.84	CC[CH+]C1CC1CC	[CH2+]C(\C=C\CC)CC	C8H15+	C8H15+
C8H15+	C8H15+	46.75	24.25	CC[CH+]C1CC1CC	C[CH+]C1CC1CCC		24.25	-24.25	46.75	23.13	-23.13	47.87	CC[CH+]C1CC1CC	C[CH+]C1CC1CCC	C8H15+	C8H15+
C8H15+	C8H15+	24.49	46.51	CC[CH+]C1CC1CC	[CH2+]C1C(CC)C1CC		46.51	-46.51	24.49	45.33	-45.33	25.67	CC[CH+]C1CC1CC	[CH2+]C1C(CC)C1CC	C8H15+	C8H15+
C8H15+	C8H15+	25.1	45.9	CC[CH+]C1CC1CC	CCC1[CH+]C(CC)C1		45.9	-45.9	25.1	44.65	-44.65	26.35	CC[CH+]C1CC1CC	CCC1[CH+]C(CC)C1	C8H15+	C8H15+
C8H15+	C8H15+	29.23	41.77	CC[CH+]C1CC1CC	C[CH+]CC1CC1CC		41.77	-41.77	29.23	39.14	-39.14	31.86	CC[CH+]C1CC1CC	C[CH+]CC1CC1CC	C8H15+	C8H15+
C8H15+	C8H15+	23.26	47.74	CC[CH+]C1CC1CC	CCC1[CH+]CC1CC		47.74	-47.74	23.26	41.02	-41.02	29.98	CC[CH+]C1CC1CC	CCC1[CH+]CC1CC	C8H15+	C8H15+
C8H15+	C8H15+	27.71	43.29	CC[CH+]C1CC1CC	CCC1CC1CC[CH2+]		43.29	-43.29	27.71	36.25	-36.25	34.75	CC[CH+]C1CC1CC	CCC1CC1CC[CH2+]	C8H15+	C8H15+
C8H15+	C8H15+	25.77	45.23	CC[CH+]C1CC1CC	CCC1CC1CC[CH2+]		45.23	-45.23	25.77	38.19	-38.19	32.81	CC[CH+]C1CC1CC	CCC1CC1CC[CH2+]	C8H15+	C8H15+
C8H15+	C8H15+	50.49	20.51	CC[CH+]C1CC1CC	[CH2+]CC1CC1CCC		20.51	-20.51	50.49	11.84	-11.84	59.16	CC[CH+]C1CC1CC	[CH2+]CC1CC1CCC	C8H15+	C8H15+
C8H15+	C7H12	41.58	29.42	CC[CH+]C1CC1CC	C=CC1CC1CC	[CH3+]	29.42	-29.42	41.58	7.15	-7.15	63.85	CC[CH+]C1CC1CC	C=CC1CC1CC	C8H15+	C7H12
C8H15+	C7H12	39.16	31.84	CC[CH+]C1CC1CC	C=CC1CC1CC	[CH3+]	31.84	-31.84	39.16	9.57	-9.57	61.43	CC[CH+]C1CC1CC	C=CC1CC1CC	C8H15+	C7H12
C8H15+	C8H14	31.03	39.97	CC[CH+]C1CC1CC	C\C=C\C1CC1CC	[H+]	39.97	-39.97	31.03	2.96	-2.96	68.04	CC[CH+]C1CC1CC	C\C=C\C1CC1CC	C8H15+	C8H14
C8H15+	C8H15+	27.84	43.16	CC1C(C)C1C[CH+]C	CC1[CH+]CC(C)C1C		43.16	-43.16	27.84	64.76	-64.76	6.24	CC1C(C)C1C[CH+]C	CC1[CH+]CC(C)C1C	C8H15+	C8H15+
C8H15+	C8H15+	26.65	44.35	CC1C(C)C1C[CH+]C	CC1[CH+]CC(C)C1C		44.35	-44.35	26.65	65.95	-65.95	5.05	CC1C(C)C1C[CH+]C	CC1[CH+]CC(C)C1C	C8H15+	C8H15+
C8H15+	C8H15+	25.64	45.36	CC1C(C)C1C[CH+]C	CC1[CH+]CC(C)C1C		45.36	-45.36	25.64	66.96	-66.96	4.04	CC1C(C)C1C[CH+]C	CC1[CH+]CC(C)C1C	C8H15+	C8H15+
C8H15+	C8H15+	23.1	47.9	CC1C(C)C1C[CH+]C	CC1[CH+]CC(C)C1C		47.9	-47.9	23.1	69.5	-69.5	1.5	CC1C(C)C1C[CH+]C	CC1[CH+]CC(C)C1C	C8H15+	C8H15+
C8H15+	C8H15+	31.59	39.41	CC1C(C)C1C[CH+]C	CC[CH+]C1C(C)C1C		39.41	-39.41	31.59	43.44	-43.44	27.56	CC1C(C)C1C[CH+]C	CC[CH+]C1C(C)C1C	C8H15+	C8H15+
C8H15+	C8H15+	54.35	16.65	CC1C(C)C1C[CH+]C	[CH2+]C1C(C)C1CCC		16.65	-16.65	54.35	16.91	-16.91	54.09	CC1C(C)C1C[CH+]C	[CH2+]C1C(C)C1CCC	C8H15+	C8H15+
C8H15+	C8H15+	28.26	42.74	CC1C(C)C1C[CH+]C	[CH2+]C1C(C)C1CCC		42.74	-42.74	28.26	43	-43	28	CC1C(C)C1C[CH+]C	[CH2+]C1C(C)C1CCC	C8H15+	C8H15+
C8H15+	C8H15+	42.36	28.64	CC1C(C)C1C[CH+]C	C[CH+]C(C)C1CC1C		28.64	-28.64	42.36	27.15	-27.15	43.85	CC1C(C)C1C[CH+]C	C[CH+]C(C)C1CC1C	C8H15+	C8H15+
C8H15+	C8H15+	40.96	30.04	CC1C(C)C1C[CH+]C	C[CH+]C(C)C1CC1C		30.04	-30.04	40.96	28.55	-28.55	42.45	CC1C(C)C1C[CH+]C	C[CH+]C(C)C1CC1C	C8H15+	C8H15+
C8H15+	C8H15+	38.98	32.02	CC1C(C)C1C[CH+]C	C[CH+]C(C)C1CC1C		32.02	-32.02	38.98	30.53	-30.53	40.47	CC1C(C)C1C[CH+]C	C[CH+]C(C)C1CC1C	C8H15+	C8H15+
C8H15+	C8H15+	27.85	43.15	CC1C(C)C1C[CH+]C	C[CH+]C(C)C1CC1C		43.15	-43.15	27.85	41.66	-41.66	29.34	CC1C(C)C1C[CH+]C	C[CH+]C(C)C1CC1C	C8H15+	C8H15+
C8H15+	C8H15+	28.79	42.21	CC1C(C)C1C[CH+]C	CC1C(C)C1CC[CH2+]		42.21	-42.21	28.79	39.18	-39.18	31.82	CC1C(C)C1C[CH+]C	CC1C(C)C1CC[CH2+]	C8H15+	C8H15+
C8H15+	C8H15+	30.16	40.84	CC1C(C)C1C[CH+]C	CCC[C+]1C(C)C1C		40.84	-40.84	30.16	35.56	-35.56	35.44	CC1C(C)C1C[CH+]C	CCC[C+]1C(C)C1C	C8H15+	C8H15+
C8H15+	C8H15+	45.58	25.42	CC1C(C)C1C[CH+]C	C[C+]1C(C)C1CCC		25.42	-25.42	45.58	19.36	-19.36	51.64	CC1C(C)C1C[CH+]C	C[C+]1C(C)C1CCC	C8H15+	C8H15+
C8H15+	C5H9+	40.16	30.84	CC1C(C)C1C[CH+]C	CC1[CH+]C1C	C=CC	30.84	-30.84	40.16	5.96	-5.96	65.04	CC1C(C)C1C[CH+]C	CC1[CH+]C1C	C8H15+	C5H9+
C8H15+	C5H9+	34.92	36.08	CC1C(C)C1C[CH+]C	CC1[CH+]C1C	C=CC	36.08	-36.08	34.92	11.2	-11.2	59.8	CC1C(C)C1C[CH+]C	CC1[CH+]C1C	C8H15+	C5H9+
C8H15+	C8H14	36.77	34.23	CC1C(C)C1C[CH+]C	CC1C(C)C1\C=C\C	[H+]	34.23	-34.23	36.77	1.16	-1.16	69.84	CC1C(C)C1C[CH+]C	CC1C(C)C1\C=C\C	C8H15+	C8H14
C8H15+	C8H14	33.28	37.72	CC1C(C)C1C[CH+]C	CC1C(C)C1\C=C\C	[H+]	37.72	-37.72	33.28	4.65	-4.65	66.35	CC1C(C)C1C[CH+]C	CC1C(C)C1\C=C\C	C8H15+	C8H14
C8H15+	C8H14	32	39	CC1C(C)C1C[CH+]C	CC1C(C)C1CC=C	[H+]	39	-39	32	1.54	-1.54	69.46	CC1C(C)C1C[CH+]C	CC1C(C)C1CC=C	C8H15+	C8H14
C8H15+	C8H15+	39.95	31.05	CC1C(C)C1CC[CH2+]	C[CH+]C1CCCC1C		31.05	-31.05	39.95	50.31	-50.31	20.69	CC1C(C)C1CC[CH2+]	C[CH+]C1CCCC1C	C8H15+	C8H15+
C8H15+	C8H15+	36.14	34.86	CC1C(C)C1CC[CH2+]	C[CH+]C1CCCC1C		34.86	-34.86	36.14	54.12	-54.12	16.88	CC1C(C)C1CC[CH2+]	C[CH+]C1CCCC1C	C8H15+	C8H15+
C8H15+	C8H15+	34.61	36.39	CC1C(C)C1CC[CH2+]	CC[CH+]C1C(C)C1C		36.39	-36.39	34.61	43.81	-43.81	27.19	CC1C(C)C1CC[CH2+]	CC[CH+]C1C(C)C1C	C8H15+	C8H15+
C8H15+	C8H15+	32.5	38.5	CC1C(C)C1CC[CH2+]	CC1C(C)C1C[CH+]C		38.5	-38.5	32.5	42.96	-42.96	28.04	CC1C(C)C1CC[CH2+]	CC1C(C)C1C[CH+]C	C8H15+	C8H15+
C8H15+	C8H15+	54.18	16.82	CC1C(C)C1CC[CH2+]	[CH2+]C1C(C)C1CCC		16.82	-16.82	54.18	20.16	-20.16	50.84	CC1C(C)C1CC[CH2+]	[CH2+]C1C(C)C1CCC	C8H15+	C8H15+
C8H15+	C8H15+	43.05	27.95	CC1C(C)C1CC[CH2+]	[CH2+]C1C(C)C1CCC		27.95	-27.95	43.05	31.29	-31.29	39.71	CC1C(C)C1CC[CH2+]	[CH2+]C1C(C)C1CCC	C8H15+	C8H15+
C8H15+	C8H15+	36.51	34.49	CC1C(C)C1CC[CH2+]	C[CH+]C(C)C1CCC1		34.49	-34.49	36.51	37.69	-37.69	33.31	CC1C(C)C1CC[CH2+]	C[CH+]C(C)C1CCC1	C8H15+	C8H15+
C8H15+	C8H15+	35.3	35.7	CC1C(C)C1CC[CH2+]	C[CH+]C(C)C1CCC1		35.7	-35.7	35.3	38.9	-38.9	32.1	CC1C(C)C1CC[CH2+]	C[CH+]C(C)C1CCC1	C8H15+	C8H15+
C8H15+	C8H15+	26.19	44.81	CC1C(C)C1CC[CH2+]	C[CH+]C(C)C1CCC1		44.81	-44.81	26.19	48.01	-48.01	22.99	CC1C(C)C1CC[CH2+]	C[CH+]C(C)C1CCC1	C8H15+	C8H15+
C8H15+	C8H15+	24.8	46.2	CC1C(C)C1CC[CH2+]	C[CH+]C(C)C1CCC1		46.2	-46.2	24.8	49.4	-49.4	21.6	CC1C(C)C1CC[CH2+]	C[CH+]C(C)C1CCC1	C8H15+	C8H15+
C8H15+	C8H15+	47.57	23.43	CC1C(C)C1CC[CH2+]	CCC[C+]1C(C)C1C		23.43	-23.43	47.57	21.82	-21.82	49.18	CC1C(C)C1CC[CH2+]	CCC[C+]1C(C)C1C	C8H15+	C8H15+
C8H15+	C8H15+	54.38	16.62	CC1C(C)C1CC[CH2+]	C[C+]1C(C)C1CCC		16.62	-16.62	54.38	13.61	-13.61	57.39	CC1C(C)C1CC[CH2+]	C[C+]1C(C)C1CCC	C8H15+	C8H15+
C8H15+	C8H15+	52.5	18.5	CC1C(C)C1CC[CH2+]	C[C+]1C(C)C1CCC		18.5	-18.5	52.5	15.49	-15.49	55.51	CC1C(C)C1CC[CH2+]	C[C+]1C(C)C1CCC	C8H15+	C8H15+
C8H15+	C6H11+	46.83	24.17	CC1C(C)C1CC[CH2+]	[CH2+]C1C(C)C1C	C=C	24.17	-24.17	46.83	9.94	-9.94	61.06	CC1C(C)C1CC[CH2+]	[CH2+]C1C(C)C1C	C8H15+	C6H11+
C8H15+	C6H11+	40.33	30.67	CC1C(C)C1CC[CH2+]	[CH2+]C1C(C)C1C	C=C	30.67	-30.67	40.33	16.44	-16.44	54.56	CC1C(C)C1CC[CH2+]	[CH2+]C1C(C)C1C	C8H15+	C6H11+
C8H15+	C8H14	34.93	36.07	CC1C(C)C1CC[CH2+]	CC1C(C)C1CC=C	[H+]	36.07	-36.07	34.93	2.1	-2.1	68.9	CC1C(C)C1CC[CH2+]	CC1C(C)C1CC=C	C8H15+	C8H14
C8H15+	C8H14	32.19	38.81	CC1C(C)C1CC[CH2+]	CC1C(C)C1CC=C	[H+]	38.81	-38.81	32.19	4.84	-4.84	66.16	CC1C(C)C1CC[CH2+]	CC1C(C)C1CC=C	C8H15+	C8H14
C8H15+	C8H15+	52.24	18.76	CCC[C+]1C(C)C1C	C[CH+]\C(=C\C)CCC		18.76	-18.76	52.24	45.14	-45.14	25.86	CCC[C+]1C(C)C1C	C[CH+]\C(=C\C)CCC	C8H15+	C8H15+
C8H15+	C8H15+	46.97	24.03	CCC[C+]1C(C)C1C	C[CH+]\C(=C\C)CCC		24.03	-24.03	46.97	50.41	-50.41	20.59	CCC[C+]1C(C)C1C	C[CH+]\C(=C\C)CCC	C8H15+	C8H15+
C8H15+	C8H15+	29.7	41.3	CCC[C+]1C(C)C1C	CC[CH+]C1C(C)C1C		41.3	-41.3	29.7	50.02	-50.02	20.98	CCC[C+]1C(C)C1C	CC[CH+]C1C(C)C1C	C8H15+	C8H15+
C8H15+	C8H15+	34.73	36.27	CCC[C+]1C(C)C1C	CC1C(C)C1C[CH+]C		36.27	-36.27	34.73	41.37	-41.37	29.63	CCC[C+]1C(C)C1C	CC1C(C)C1C[CH+]C	C8H15+	C8H15+
C8H15+	C8H15+	29.93	41.07	CCC[C+]1C(C)C1C	[CH2+]C1C(C)C1CCC		41.07	-41.07	29.93	45.98	-45.98	25.02	CCC[C+]1C(C)C1C	[CH2+]C1C(C)C1CCC	C8H15+	C8H15+
C8H15+	C8H15+	49.13	21.87	CCC[C+]1C(C)C1C	CC1C(C)C1CC[CH2+]		21.87	-21.87	49.13	23.56	-23.56	47.44	CCC[C+]1C(C)C1C	CC1C(C)C1CC[CH2+]	C8H15+	C8H15+
C8H15+	C8H15+	26.85	44.15	CCC[C+]1C(C)C1C	C[C+]1C(C)C1CCC		44.15	-44.15	26.85	43.77	-43.77	27.23	CCC[C+]1C(C)C1C	C[C+]1C(C)C1CCC	C8H15+	C8H15+
C8H15+	C6H10	43.25	27.75	CCC[C+]1C(C)C1C	C=C1C(C)C1C	[CH2+]C	27.75	-27.75	43.25	8.4	-8.4	62.6	CCC[C+]1C(C)C1C	C=C1C(C)C1C	C8H15+	C6H10
C8H15+	C6H10	37.11	33.89	CCC[C+]1C(C)C1C	C=C1C(C)C1C	[CH2+]C	33.89	-33.89	37.11	14.54	-14.54	56.46	CCC[C+]1C(C)C1C	C=C1C(C)C1C	C8H15+	C6H10
C8H15+	C8H14	30.34	40.66	CCC[C+]1C(C)C1C	CC\C=C1/C(C)C1C	[H+]	40.66	-40.66	30.34	4.94	-4.94	66.06	CCC[C+]1C(C)C1C	CC\C=C1/C(C)C1C	C8H15+	C8H14
C8H15+	C7H12	28.89	42.11	CCC[C+]1C(C)C1C	CCCC1=CC1C	[CH3+]	42.11	-42.11	28.89	5.89	-5.89	65.11	CCC[C+]1C(C)C1C	CCCC1=CC1C	C8H15+	C7H12
C8H15+	C8H15+	50.68	20.32	CCC[C+]1CC1(C)C	C[C+](C)C(=C)CCC		20.32	-20.32	50.68	45.89	-45.89	25.11	CCC[C+]1CC1(C)C	C[C+](C)C(=C)CCC	C8H15+	C8H15+
C8H15+	C8H15+	48.34	22.66	CCC[C+]1CC1(C)C	C[C+](C)C(=C)CCC		22.66	-22.66	48.34	48.23	-48.23	22.77	CCC[C+]1CC1(C)C	C[C+](C)C(=C)CCC	C8H15+	C8H15+
C8H15+	C8H15+	30.47	40.53	CCC[C+]1CC1(C)C	CC[CH+]C1CC1(C)C		40.53	-40.53	30.47	47.58	-47.58	23.42	CCC[C+]1CC1(C)C	CC[CH+]C1CC1(C)C	C8H15+	C8H15+
C8H15+	C8H15+	48.9	22.1	CCC[C+]1CC1(C)C	[CH2+]CCC1CC1(C)C		22.1	-22.1	48.9	23.67	-23.67	47.33	CCC[C+]1CC1(C)C	[CH2+]CCC1CC1(C)C	C8H15+	C8H15+
C8H15+	C6H10	42.86	28.14	CCC[C+]1CC1(C)C	C=C1CC1(C)C	[CH2+]C	28.14	-28.14	42.86	8.7	-8.7	62.3	CCC[C+]1CC1(C)C	C=C1CC1(C)C	C8H15+	C6H10
C8H15+	C6H10	36.58	34.42	CCC[C+]1CC1(C)C	C=C1CC1(C)C	[CH2+]C	34.42	-34.42	36.58	14.98	-14.98	56.02	CCC[C+]1CC1(C)C	C=C1CC1(C)C	C8H15+	C6H10
C8H15+	C7H12	29.93	41.07	CCC[C+]1CC1(C)C	CC=1CC=1CCC	[CH3+]	41.07	-41.07	29.93	9	-9	62	CCC[C+]1CC1(C)C	CC=1CC=1CCC	C8H15+	C7H12
C8H15+	C8H14	30.19	40.81	CCC[C+]1CC1(C)C	CC\C=C1/CC1(C)C	[H+]	40.81	-40.81	30.19	4.87	-4.87	66.13	CCC[C+]1CC1(C)C	CC\C=C1/CC1(C)C	C8H15+	C8H14
C8H15+	C8H15+	52.4	18.6	CCC[C+]1CC1CC	[CH2+]/C(=C\CC)CCC		18.6	-18.6	52.4	45.74	-45.74	25.26	CCC[C+]1CC1CC	[CH2+]/C(=C\CC)CCC	C8H15+	C8H15+
C8H15+	C8H15+	49.66	21.34	CCC[C+]1CC1CC	[CH2+]/C(=C\CC)CCC		21.34	-21.34	49.66	48.48	-48.48	22.52	CCC[C+]1CC1CC	[CH2+]/C(=C\CC)CCC	C8H15+	C8H15+
C8H15+	C8H15+	34.4	36.6	CCC[C+]1CC1CC	C[CH+]C1CC1CCC		36.6	-36.6	34.4	46.56	-46.56	24.44	CCC[C+]1CC1CC	C[CH+]C1CC1CCC	C8H15+	C8H15+
C8H15+	C8H15+	30.19	40.81	CCC[C+]1CC1CC	CC[CH+]C1CC1CC		40.81	-40.81	30.19	50.72	-50.72	20.28	CCC[C+]1CC1CC	CC[CH+]C1CC1CC	C8H15+	C8H15+
C8H15+	C8H15+	36.29	34.71	CCC[C+]1CC1CC	C[CH+]CC1CC1CC		34.71	-34.71	36.29	42.88	-42.88	28.12	CCC[C+]1CC1CC	C[CH+]CC1CC1CC	C8H15+	C8H15+
C8H15+	C8H15+	50.34	20.66	CCC[C+]1CC1CC	CCC1CC1CC[CH2+]		20.66	-20.66	50.34	23.45	-23.45	47.55	CCC[C+]1CC1CC	CCC1CC1CC[CH2+]	C8H15+	C8H15+
C8H15+	C8H15+	50.09	20.91	CCC[C+]1CC1CC	[CH2+]CC1CC1CCC		20.91	-20.91	50.09	23.41	-23.41	47.59	CCC[C+]1CC1CC	[CH2+]CC1CC1CCC	C8H15+	C8H15+
C8H15+	C8H15+	26.69	44.31	CCC[C+]1CC1CC	CC[C+]1CC1CCC		44.31	-44.31	26.69	45.15	-45.15	25.85	CCC[C+]1CC1CC	CC[C+]1CC1CCC	C8H15+	C8H15+
C8H15+	C6H10	44.7	26.3	CCC[C+]1CC1CC	C=C1CC1CC	[CH2+]C	26.3	-26.3	44.7	8.37	-8.37	62.63	CCC[C+]1CC1CC	C=C1CC1CC	C8H15+	C6H10
C8H15+	C6H10	39.22	31.78	CCC[C+]1CC1CC	C=C1CC1CC	[CH2+]C	31.78	-31.78	39.22	13.85	-13.85	57.15	CCC[C+]1CC1CC	C=C1CC1CC	C8H15+	C6H10
C8H15+	C6H10	32.2	38.8	CCC[C+]1CC1CC	CCCC1=CC1	[CH2+]C	38.8	-38.8	32.2	6.6	-6.6	64.4	CCC[C+]1CC1CC	CCCC1=CC1	C8H15+	C6H10
C8H15+	C6H10	25.88	45.12	CCC[C+]1CC1CC	CCCC1=CC1	[CH2+]C	45.12	-45.12	25.88	12.92	-12.92	58.08	CCC[C+]1CC1CC	CCCC1=CC1	C8H15+	C6H10
C8H15+	C8H14	35.82	35.18	CCC[C+]1CC1CC	CC\C=C1/CC1CC	[H+]	35.18	-35.18	35.82	0.59	-0.59	70.41	CCC[C+]1CC1CC	CC\C=C1/CC1CC	C8H15+	C8H14
C8H15+	C8H14	31.43	39.57	CCC[C+]1CC1CC	CC\C=C1/CC1CC	[H+]	39.57	-39.57	31.43	4.98	-4.98	66.02	CCC[C+]1CC1CC	CC\C=C1/CC1CC	C8H15+	C8H14
C8H15+	C8H15+	54.73	16.27	CCC1[CH+]C1CCC	CCC[CH+]\C=C\CC		16.27	-16.27	54.73	51.1	-51.1	19.9	CCC1[CH+]C1CCC	CCC[CH+]\C=C\CC	C8H15+	C8H15+
C8H15+	C8H15+	53.45	17.55	CCC1[CH+]C1CCC	CCC[CH+]\C=C\CC		17.55	-17.55	53.45	52.38	-52.38	18.62	CCC1[CH+]C1CCC	CCC[CH+]\C=C\CC	C8H15+	C8H15+
C8H15+	C8H15+	46.84	24.16	CCC1[CH+]C1CCC	CCC[CH+]\C=C\CC		24.16	-24.16	46.84	58.99	-58.99	12.01	CCC1[CH+]C1CCC	CCC[CH+]\C=C\CC	C8H15+	C8H15+
C8H15+	C8H15+	35.51	35.49	CCC1[CH+]C1CCC	CC[CH+]C1CC1CC		35.49	-35.49	35.51	48.94	-48.94	22.06	CCC1[CH+]C1CCC	CC[CH+]C1CC1CC	C8H15+	C8H15+
C8H15+	C8H15+	34.51	36.49	CCC1[CH+]C1CCC	C[CH+]C1CC1CCC		36.49	-36.49	34.51	49.34	-49.34	21.66	CCC1[CH+]C1CCC	C[CH+]C1CC1CCC	C8H15+	C8H15+
C8H15+	C8H15+	48.87	22.13	CCC1[CH+]C1CCC	C[CH+]CC1CC1CC		22.13	-22.13	48.87	29.84	-29.84	41.16	CCC1[CH+]C1CCC	C[CH+]CC1CC1CC	C8H15+	C8H15+
C8H15+	C8H15+	55.4	15.6	CCC1[CH+]C1CCC	CCC1CC1CC[CH2+]		15.6	-15.6	55.4	22.02	-22.02	48.98	CCC1[CH+]C1CCC	CCC1CC1CC[CH2+]	C8H15+	C8H15+
C8H15+	C8H15+	27.89	43.11	CCC1[CH+]C1CCC	CCC[C+]1CC1CC		43.11	-43.11	27.89	48.16	-48.16	22.84	CCC1[CH+]C1CCC	CCC[C+]1CC1CC	C8H15+	C8H15+
C8H15+	C8H15+	26.81	44.19	CCC1[CH+]C1CCC	CC[C+]1CC1CCC		44.19	-44.19	26.81	48.51	-48.51	22.49	CCC1[CH+]C1CCC	CC[C+]1CC1CCC	C8H15+	C8H15+
C8H15+	C8H15+	52.1	18.9	CCC1[CH+]C1CCC	[CH2+]CC1CC1CCC		18.9	-18.9	52.1	22.38	-22.38	48.62	CCC1[CH+]C1CCC	[CH2+]CC1CC1CCC	C8H15+	C8H15+
C8H15+	C5H8	30.51	40.49	CCC1[CH+]C1CCC	CCC1C=C1	[CH2+]CC	40.49	-40.49	30.51	7.58	-7.58	63.42	CCC1[CH+]C1CCC	CCC1C=C1	C8H15+	C5H8
C8H15+	C6H10	29.63	41.37	CCC1[CH+]C1CCC	CCCC1C=C1	[CH2+]C	41.37	-41.37	29.63	7.71	-7.71	63.29	CCC1[CH+]C1CCC	CCCC1C=C1	C8H15+	C6H10
C8H15+	C8H15+	42.66	28.34	CCC1CC1CC[CH2+]	CC[CH+]C1CCCC1		28.34	-28.34	42.66	49.91	-49.91	21.09	CCC1CC1CC[CH2+]	CC[CH+]C1CCCC1	C8H15+	C8H15+
C8H15+	C8H15+	41.34	29.66	CCC1CC1CC[CH2+]	[CH2+]C1CCCC1CC		29.66	-29.66	41.34	49.16	-49.16	21.84	CCC1CC1CC[CH2+]	[CH2+]C1CCCC1CC	C8H15+	C8H15+
C8H15+	C8H15+	35.94	35.06	CCC1CC1CC[CH2+]	[CH2+]C1CCCC1CC		35.06	-35.06	35.94	54.56	-54.56	16.44	CCC1CC1CC[CH2+]	[CH2+]C1CCCC1CC	C8H15+	C8H15+
C8H15+	C8H15+	35.1	35.9	CCC1CC1CC[CH2+]	CC[CH+]C1CC1CC		35.9	-35.9	35.1	43.68	-43.68	27.32	CCC1CC1CC[CH2+]	CC[CH+]C1CC1CC	C8H15+	C8H15+
C8H15+	C8H15+	56.42	14.58	CCC1CC1CC[CH2+]	C[CH+]C1CC1CCC		14.58	-14.58	56.42	21.5	-21.5	49.5	CCC1CC1CC[CH2+]	C[CH+]C1CC1CCC	C8H15+	C8H15+
C8H15+	C8H15+	36.09	34.91	CCC1CC1CC[CH2+]	CC[CH+]CC1CCC1		34.91	-34.91	36.09	40.89	-40.89	30.11	CCC1CC1CC[CH2+]	CC[CH+]CC1CCC1	C8H15+	C8H15+
C8H15+	C8H15+	50.19	20.81	CCC1CC1CC[CH2+]	C[CH+]CC1CC1CC		20.81	-20.81	50.19	24.45	-24.45	46.55	CCC1CC1CC[CH2+]	C[CH+]CC1CC1CC	C8H15+	C8H15+
C8H15+	C8H15+	35.4	35.6	CCC1CC1CC[CH2+]	[CH2+]C(CC)C1CCC1		35.6	-35.6	35.4	35.69	-35.69	35.31	CCC1CC1CC[CH2+]	[CH2+]C(CC)C1CCC1	C8H15+	C8H15+
C8H15+	C8H15+	34.25	36.75	CCC1CC1CC[CH2+]	[CH2+]C(CC)C1CCC1		36.75	-36.75	34.25	36.84	-36.84	34.16	CCC1CC1CC[CH2+]	[CH2+]C(CC)C1CCC1	C8H15+	C8H15+
C8H15+	C8H15+	23.93	47.07	CCC1CC1CC[CH2+]	[CH2+]C(CC)C1CCC1		47.07	-47.07	23.93	47.16	-47.16	23.84	CCC1CC1CC[CH2+]	[CH2+]C(CC)C1CCC1	C8H15+	C8H15+
C8H15+	C8H15+	32.6	38.4	CCC1CC1CC[CH2+]	[CH2+]CC1CC1CCC		38.4	-38.4	32.6	38.38	-38.38	32.62	CCC1CC1CC[CH2+]	[CH2+]CC1CC1CCC	C8H15+	C8H15+
C8H15+	C8H15+	48.11	22.89	CCC1CC1CC[CH2+]	CCC[C+]1CC1CC		22.89	-22.89	48.11	22	-22	49	CCC1CC1CC[CH2+]	CCC[C+]1CC1CC	C8H15+	C8H15+
C8H15+	C8H15+	54.78	16.22	CCC1CC1CC[CH2+]	CC[C+]1CC1CCC		16.22	-16.22	54.78	14.47	-14.47	56.53	CCC1CC1CC[CH2+]	CC[C+]1CC1CCC	C8H15+	C8H15+
C8H15+	C8H15+	50.89	20.11	CCC1CC1CC[CH2+]	CCC1[CH+]C1CCC		20.11	-20.11	50.89	13.39	-13.39	57.61	CCC1CC1CC[CH2+]	CCC1[CH+]C1CCC	C8H15+	C8H15+
C8H15+	C8H15+	22.89	48.11	CCC1CC1CC[CH2+]	CCC1[CH+]C1CCC		48.11	-48.11	22.89	41.39	-41.39	29.61	CCC1CC1CC[CH2+]	CCC1[CH+]C1CCC	C8H15+	C8H15+
C8H15+	C6H11+	46.23	24.77	CCC1CC1CC[CH2+]	[CH2+]C1CC1CC	C=C	24.77	-24.77	46.23	10.84	-10.84	60.16	CCC1CC1CC[CH2+]	[CH2+]C1CC1CC	C8H15+	C6H11+
C8H15+	C8H14	32.22	38.78	CCC1CC1CC[CH2+]	CCC1CC1CC=C	[H+]	38.78	-38.78	32.22	4.85	-4.85	66.15	CCC1CC1CC[CH2+]	CCC1CC1CC=C	C8H15+	C8H14
C8H15+	C8H15+	56.16	14.84	CCCC1[CH+]C1(C)C	C[C+](C)/C=C/CCC		14.84	-14.84	56.16	51.04	-51.04	19.96	CCCC1[CH+]C1(C)C	C[C+](C)/C=C/CCC	C8H15+	C8H15+
C8H15+	C8H15+	53.62	17.38	CCCC1[CH+]C1(C)C	C[C+](C)/C=C/CCC		17.38	-17.38	53.62	53.58	-53.58	17.42	CCCC1[CH+]C1(C)C	C[C+](C)/C=C/CCC	C8H15+	C8H15+
C8H15+	C8H15+	49.75	21.25	CCCC1[CH+]C1(C)C	C[C+](C)/C=C/CCC		21.25	-21.25	49.75	57.45	-57.45	13.55	CCCC1[CH+]C1(C)C	C[C+](C)/C=C/CCC	C8H15+	C8H15+
C8H15+	C8H15+	34.69	36.31	CCCC1[CH+]C1(C)C	CC[CH+]C1CC1(C)C		36.31	-36.31	34.69	50.26	-50.26	20.74	CCCC1[CH+]C1(C)C	CC[CH+]C1CC1(C)C	C8H15+	C8H15+
C8H15+	C8H15+	33.12	37.88	CCCC1[CH+]C1(C)C	CCCC1CC1([CH2+])C		37.88	-37.88	33.12	46.93	-46.93	24.07	CCCC1[CH+]C1(C)C	CCCC1CC1([CH2+])C	C8H15+	C8H15+
C8H15+	C8H15+	52	19	CCCC1[CH+]C1(C)C	C[CH+]CC1CC1(C)C		19	-19	52	27.09	-27.09	43.91	CCCC1[CH+]C1(C)C	C[CH+]CC1CC1(C)C	C8H15+	C8H15+
C8H15+	C8H15+	56.98	14.02	CCCC1[CH+]C1(C)C	[CH2+]CCC1CC1(C)C		14.02	-14.02	56.98	20.24	-20.24	50.76	CCCC1[CH+]C1(C)C	[CH2+]CCC1CC1(C)C	C8H15+	C8H15+
C8H15+	C8H15+	28.87	42.13	CCCC1[CH+]C1(C)C	CCC[C+]1CC1(C)C		42.13	-42.13	28.87	46.7	-46.7	24.3	CCCC1[CH+]C1(C)C	CCC[C+]1CC1(C)C	C8H15+	C8H15+
C8H15+	C7H12	30.49	40.51	CCCC1[CH+]C1(C)C	CC1=CC1CCC	[CH3+]	40.51	-40.51	30.49	9.2	-9.2	61.8	CCCC1[CH+]C1(C)C	CC1=CC1CCC	C8H15+	C7H12
C8H15+	C7H12	28.55	42.45	CCCC1[CH+]C1(C)C	CC1=CC1CCC	[CH3+]	42.45	-42.45	28.55	11.14	-11.14	59.86	CCCC1[CH+]C1(C)C	CC1=CC1CCC	C8H15+	C7H12
C8H15+	C5H8	30.41	40.59	CCCC1[CH+]C1(C)C	CC1(C)C=C1	[CH2+]CC	40.59	-40.59	30.41	8.14	-8.14	62.86	CCCC1[CH+]C1(C)C	CC1(C)C=C1	C8H15+	C5H8
C8H15+	C8H15+	65.5	5.5	CCCC1CC1([CH2+])C	C=C(C)C[CH+]CCC		5.5	-5.5	65.5	13.42	-13.42	57.58	CCCC1CC1([CH2+])C	C=C(C)C[CH+]CCC	C8H15+	C8H15+
C8H15+	C8H15+	61.62	9.38	CCCC1CC1([CH2+])C	C=C(C)C[CH+]CCC		9.38	-9.38	61.62	17.3	-17.3	53.7	CCCC1CC1([CH2+])C	C=C(C)C[CH+]CCC	C8H15+	C8H15+
C8H15+	C8H15+	27.55	43.45	CCCC1CC1([CH2+])C	C[C+]1CC(CCC)C1		43.45	-43.45	27.55	47.62	-47.62	23.38	CCCC1CC1([CH2+])C	C[C+]1CC(CCC)C1	C8H15+	C8H15+
C8H15+	C8H15+	27.5	43.5	CCCC1CC1([CH2+])C	C[C+]1CCC1CCC		43.5	-43.5	27.5	47.4	-47.4	23.6	CCCC1CC1([CH2+])C	C[C+]1CCC1CCC	C8H15+	C8H15+
C8H15+	C8H15+	49.09	21.91	CCCC1CC1([CH2+])C	CC[CH+]C1CC1(C)C		21.91	-21.91	49.09	25.13	-25.13	45.87	CCCC1CC1([CH2+])C	CC[CH+]C1CC1(C)C	C8H15+	C8H15+
C8H15+	C8H15+	64.09	6.91	CCCC1CC1([CH2+])C	C=C(C)C([CH2+])CCC		6.91	-6.91	64.09	9.75	-9.75	61.25	CCCC1CC1([CH2+])C	C=C(C)C([CH2+])CCC	C8H15+	C8H15+
C8H15+	C8H15+	59.91	11.09	CCCC1CC1([CH2+])C	C=C(C)C([CH2+])CCC		11.09	-11.09	59.91	13.93	-13.93	57.07	CCCC1CC1([CH2+])C	C=C(C)C([CH2+])CCC	C8H15+	C8H15+
C8H15+	C8H15+	53.58	17.42	CCCC1CC1([CH2+])C	C[CH+]CC1CC1(C)C		17.42	-17.42	53.58	19.44	-19.44	51.56	CCCC1CC1([CH2+])C	C[CH+]CC1CC1(C)C	C8H15+	C8H15+
C8H15+	C8H15+	52.56	18.44	CCCC1CC1([CH2+])C	[CH2+]CCC1CC1(C)C		18.44	-18.44	52.56	15.28	-15.28	55.72	CCCC1CC1([CH2+])C	[CH2+]CCC1CC1(C)C	C8H15+	C8H15+
C8H15+	C8H15+	24.19	46.81	CCCC1CC1([CH2+])C	CCCC1[CH+]C1(C)C		46.81	-46.81	24.19	37.27	-37.27	33.73	CCCC1CC1([CH2+])C	CCCC1[CH+]C1(C)C	C8H15+	C8H15+
C8H15+	C7H12	31.48	39.52	CCCC1CC1([CH2+])C	C=C1CC1CCC	[CH3+]	39.52	-39.52	31.48	10.6	-10.6	60.4	CCCC1CC1([CH2+])C	C=C1CC1CCC	C8H15+	C7H12
C8H15+	C7H12	26.98	44.02	CCCC1CC1([CH2+])C	C=C1CC1CCC	[CH3+]	44.02	-44.02	26.98	15.1	-15.1	55.9	CCCC1CC1([CH2+])C	C=C1CC1CCC	C8H15+	C7H12
C8H17+	C4H8	47.83	23.17	[CH2+]C(C)(C)C(C)(C)C	C=C(C)C	C[C+](C)C	23.17	-23.17	47.83	25.42	-25.42	45.58	[CH2+]C(C)(C)C(C)(C)C	C=C(C)C	C8H17+	C4H8
C8H17+	C7H14	44.01	26.99	[CH2+]C(C)(C)C(C)(C)C	C=C(C)C(C)(C)C	[CH3+]	26.99	-26.99	44.01	15.43	-15.43	55.57	[CH2+]C(C)(C)C(C)(C)C	C=C(C)C(C)(C)C	C8H17+	C7H14
C8H17+	C7H14	38.96	32.04	[CH2+]C(C)(C)C(C)(C)C	C=C(C)C(C)(C)C	[CH3+]	32.04	-32.04	38.96	20.48	-20.48	50.52	[CH2+]C(C)(C)C(C)(C)C	C=C(C)C(C)(C)C	C8H17+	C7H14
C8H17+	C8H17+	54.25	16.75	[CH2+]C(C)(C)CCCC	CC(C)(C)C[CH+]CC		16.75	-16.75	54.25	24.3	-24.3	46.7	[CH2+]C(C)(C)CCCC	CC(C)(C)C[CH+]CC	C8H17+	C8H17+
C8H17+	C8H17+	37.11	33.89	[CH2+]C(C)(C)CCCC	CCC[CH+]C(C)(C)C		33.89	-33.89	37.11	40.18	-40.18	30.82	[CH2+]C(C)(C)CCCC	CCC[CH+]C(C)(C)C	C8H17+	C8H17+
C8H17+	C8H17+	59.72	11.28	[CH2+]C(C)(C)CCCC	CC(C)(C)CC[CH+]C		11.28	-11.28	59.72	16.98	-16.98	54.02	[CH2+]C(C)(C)CCCC	CC(C)(C)CC[CH+]C	C8H17+	C8H17+
C8H17+	C8H17+	57.68	13.32	[CH2+]C(C)(C)CCCC	CC(C)(C)CCC[CH2+]		13.32	-13.32	57.68	11.63	-11.63	59.37	[CH2+]C(C)(C)CCCC	CC(C)(C)CCC[CH2+]	C8H17+	C8H17+
C8H17+	C4H8	48.93	22.07	[CH2+]C(C)(C)CCCC	C=C(C)C	CCC[CH2+]	22.07	-22.07	48.93	13.9	-13.9	57.1	[CH2+]C(C)(C)CCCC	C=C(C)C	C8H17+	C4H8
C8H17+	C4H8	41.59	29.41	[CH2+]C(C)(C)CCCC	C=C(C)C	CCC[CH2+]	29.41	-29.41	41.59	21.24	-21.24	49.76	[CH2+]C(C)(C)CCCC	C=C(C)C	C8H17+	C4H8
C8H17+	C7H14	45.09	25.91	[CH2+]C(C)(C)CCCC	C=C(C)CCCC	[CH3+]	25.91	-25.91	45.09	13.2	-13.2	57.8	[CH2+]C(C)(C)CCCC	C=C(C)CCCC	C8H17+	C7H14
C8H17+	C7H14	40.55	30.45	[CH2+]C(C)(C)CCCC	C=C(C)CCCC	[CH3+]	30.45	-30.45	40.55	17.74	-17.74	53.26	[CH2+]C(C)(C)CCCC	C=C(C)CCCC	C8H17+	C7H14
C8H17+	C5H10	26.65	44.35	[CH2+]C(C)(C)CCCC	CC1(C)CC1	[CH2+]CC	44.35	-44.35	26.65	27.82	-27.82	43.18	[CH2+]C(C)(C)CCCC	CC1(C)CC1	C8H17+	C5H10
C8H17+	C8H17+	23.12	47.88	[CH2+]C(C)(CC)CCC	C[C+](CC)CCCC		47.88	-47.88	23.12	60.98	-60.98	10.02	[CH2+]C(C)(CC)CCC	C[C+](CC)CCCC	C8H17+	C8H17+
C8H17+	C8H17+	55.25	15.75	[CH2+]C(C)(CC)CCC	CC(C)(C[CH+]C)CC		15.75	-15.75	55.25	24.35	-24.35	46.65	[CH2+]C(C)(CC)CCC	CC(C)(C[CH+]C)CC	C8H17+	C8H17+
C8H17+	C8H17+	39.86	31.14	[CH2+]C(C)(CC)CCC	CC[CH+]C(C)(C)CC		31.14	-31.14	39.86	38.98	-38.98	32.02	[CH2+]C(C)(CC)CCC	CC[CH+]C(C)(C)CC	C8H17+	C8H17+
C8H17+	C8H17+	35.77	35.23	[CH2+]C(C)(CC)CCC	C[CH+]C(C)(C)CCC		35.23	-35.23	35.77	41.53	-41.53	29.47	[CH2+]C(C)(CC)CCC	C[CH+]C(C)(C)CCC	C8H17+	C8H17+
C8H17+	C8H17+	38.69	32.31	[CH2+]C(C)(CC)CCC	C[CH+]C(C)(C)CCC		32.31	-32.31	38.69	38.61	-38.61	32.39	[CH2+]C(C)(CC)CCC	C[CH+]C(C)(C)CCC	C8H17+	C8H17+
C8H17+	C8H17+	52.34	18.66	[CH2+]C(C)(CC)CCC	CC(C)(C[CH2+])CCC		18.66	-18.66	52.34	20.22	-20.22	50.78	[CH2+]C(C)(CC)CCC	CC(C)(C[CH2+])CCC	C8H17+	C8H17+
C8H17+	C8H17+	49.54	21.46	[CH2+]C(C)(CC)CCC	CC(C)(C[CH2+])CCC		21.46	-21.46	49.54	23.02	-23.02	47.98	[CH2+]C(C)(CC)CCC	CC(C)(C[CH2+])CCC	C8H17+	C8H17+
C8H17+	C8H17+	56.47	14.53	[CH2+]C(C)(CC)CCC	CC(C)(CC)CC[CH2+]		14.53	-14.53	56.47	15.2	-15.2	55.8	[CH2+]C(C)(CC)CCC	CC(C)(CC)CC[CH2+]	C8H17+	C8H17+
C8H17+	C5H10	51.35	19.65	[CH2+]C(C)(CC)CCC	C=C(C)CC	[CH2+]CC	19.65	-19.65	51.35	14.06	-14.06	56.94	[CH2+]C(C)(CC)CCC	C=C(C)CC	C8H17+	C5H10
C8H17+	C5H10	43.7	27.3	[CH2+]C(C)(CC)CCC	C=C(C)CC	[CH2+]CC	27.3	-27.3	43.7	21.71	-21.71	49.29	[CH2+]C(C)(CC)CCC	C=C(C)CC	C8H17+	C5H10
C8H17+	C6H12	48.76	22.24	[CH2+]C(C)(CC)CCC	C=C(C)CCC	[CH2+]C	22.24	-22.24	48.76	15.74	-15.74	55.26	[CH2+]C(C)(CC)CCC	C=C(C)CCC	C8H17+	C6H12
C8H17+	C6H12	44.08	26.92	[CH2+]C(C)(CC)CCC	C=C(C)CCC	[CH2+]C	26.92	-26.92	44.08	20.42	-20.42	50.58	[CH2+]C(C)(CC)CCC	C=C(C)CCC	C8H17+	C6H12
C8H17+	C7H14	46.99	24.01	[CH2+]C(C)(CC)CCC	C=C(CC)CCC	[CH3+]	24.01	-24.01	46.99	13.21	-13.21	57.79	[CH2+]C(C)(CC)CCC	C=C(CC)CCC	C8H17+	C7H14
C8H17+	C7H14	42.83	28.17	[CH2+]C(C)(CC)CCC	C=C(CC)CCC	[CH3+]	28.17	-28.17	42.83	17.37	-17.37	53.63	[CH2+]C(C)(CC)CCC	C=C(CC)CCC	C8H17+	C7H14
C8H17+	C6H12	28.87	42.13	[CH2+]C(C)(CC)CCC	CC1(CC)CC1	[CH2+]C	42.13	-42.13	28.87	27.27	-27.27	43.73	[CH2+]C(C)(CC)CCC	CC1(CC)CC1	C8H17+	C6H12
C8H17+	C7H14	27.35	43.65	[CH2+]C(C)(CC)CCC	CC1(CCC)CC1	[CH3+]	43.65	-43.65	27.35	25.89	-25.89	45.11	[CH2+]C(C)(CC)CCC	CC1(CCC)CC1	C8H17+	C7H14
C8H17+	C8H17+	36.91	34.09	[CH2+]C(C)C(C)(C)CC	C[C+](C)C(C)(C)CC		34.09	-34.09	36.91	43.22	-43.22	27.78	[CH2+]C(C)C(C)(C)CC	C[C+](C)C(C)(C)CC	C8H17+	C8H17+
C8H17+	C8H17+	54.89	16.11	[CH2+]C(C)C(C)(C)CC	CC(C)C(C)(C)[CH+]C		16.11	-16.11	54.89	21.67	-21.67	49.33	[CH2+]C(C)C(C)(C)CC	CC(C)C(C)(C)[CH+]C	C8H17+	C8H17+
C8H17+	C8H17+	52.73	18.27	[CH2+]C(C)C(C)(C)CC	CC(C)C(C)(C)[CH+]C		18.27	-18.27	52.73	23.83	-23.83	47.17	[CH2+]C(C)C(C)(C)CC	CC(C)C(C)(C)[CH+]C	C8H17+	C8H17+
C8H17+	C8H17+	59.12	11.88	[CH2+]C(C)C(C)(C)CC	CC(C)C(C)(C)C[CH2+]		11.88	-11.88	59.12	12.55	-12.55	58.45	[CH2+]C(C)C(C)(C)CC	CC(C)C(C)(C)C[CH2+]	C8H17+	C8H17+
C8H17+	C8H17+	49.69	21.31	[CH2+]C(C)C(C)(C)CC	CC(C)C([CH2+])(C)CC		21.31	-21.31	49.69	20.64	-20.64	50.36	[CH2+]C(C)C(C)(C)CC	CC(C)C([CH2+])(C)CC	C8H17+	C8H17+
C8H17+	C3H6	53.57	17.43	[CH2+]C(C)C(C)(C)CC	C=CC	C[C+](C)CC	17.43	-17.43	53.57	15.38	-15.38	55.62	[CH2+]C(C)C(C)(C)CC	C=CC	C8H17+	C3H6
C8H17+	C3H6	46.8	24.2	[CH2+]C(C)C(C)(C)CC	C=CC	C[C+](C)CC	24.2	-24.2	46.8	22.15	-22.15	48.85	[CH2+]C(C)C(C)(C)CC	C=CC	C8H17+	C3H6
C8H17+	C7H14	43.98	27.02	[CH2+]C(C)C(C)(C)CC	C=CC(C)(C)CC	[CH3+]	27.02	-27.02	43.98	13.35	-13.35	57.65	[CH2+]C(C)C(C)(C)CC	C=CC(C)(C)CC	C8H17+	C7H14
C8H17+	C7H14	39.7	31.3	[CH2+]C(C)C(C)(C)CC	C=CC(C)(C)CC	[CH3+]	31.3	-31.3	39.7	17.63	-17.63	53.37	[CH2+]C(C)C(C)(C)CC	C=CC(C)(C)CC	C8H17+	C7H14
C8H17+	C8H16	23.51	47.49	[CH2+]C(C)C(C)(C)CC	CC1CCCC1(C)C	[H+]	47.49	-47.49	23.51	31	-31	40	[CH2+]C(C)C(C)(C)CC	CC1CCCC1(C)C	C8H17+	C8H16
C8H17+	C8H16	37.03	33.97	[CH2+]C(C)C(C)(C)CC	C=C(C)C(C)(C)CC	[H+]	33.97	-33.97	37.03	3.29	-3.29	67.71	[CH2+]C(C)C(C)(C)CC	C=C(C)C(C)(C)CC	C8H17+	C8H16
C8H17+	C8H16	32.4	38.6	[CH2+]C(C)C(C)(C)CC	C=C(C)C(C)(C)CC	[H+]	38.6	-38.6	32.4	7.92	-7.92	63.08	[CH2+]C(C)C(C)(C)CC	C=C(C)C(C)(C)CC	C8H17+	C8H16
C8H17+	C8H17+	35.5	35.5	[CH2+]C(C)CC(C)(C)C	C[C+](C)CC(C)(C)C		35.5	-35.5	35.5	44.17	-44.17	26.83	[CH2+]C(C)CC(C)(C)C	C[C+](C)CC(C)(C)C	C8H17+	C8H17+
C8H17+	C8H17+	34.18	36.82	[CH2+]C(C)CC(C)(C)C	C[C+](C)CC(C)(C)C		36.82	-36.82	34.18	45.49	-45.49	25.51	[CH2+]C(C)CC(C)(C)C	C[C+](C)CC(C)(C)C	C8H17+	C8H17+
C8H17+	C8H17+	31.37	39.63	[CH2+]C(C)CC(C)(C)C	CC(C)[CH+]C(C)(C)C		39.63	-39.63	31.37	40.21	-40.21	30.79	[CH2+]C(C)CC(C)(C)C	CC(C)[CH+]C(C)(C)C	C8H17+	C8H17+
C8H17+	C8H17+	57.04	13.96	[CH2+]C(C)CC(C)(C)C	CC(C)CC([CH2+])(C)C		13.96	-13.96	57.04	13.83	-13.83	57.17	[CH2+]C(C)CC(C)(C)C	CC(C)CC([CH2+])(C)C	C8H17+	C8H17+
C8H17+	C3H6	45.74	25.26	[CH2+]C(C)CC(C)(C)C	C=CC	[CH2+]C(C)(C)C	25.26	-25.26	45.74	13.1	-13.1	57.9	[CH2+]C(C)CC(C)(C)C	C=CC	C8H17+	C3H6
C8H17+	C3H6	41.04	29.96	[CH2+]C(C)CC(C)(C)C	C=CC	[CH2+]C(C)(C)C	29.96	-29.96	41.04	17.8	-17.8	53.2	[CH2+]C(C)CC(C)(C)C	C=CC	C8H17+	C3H6
C8H17+	C4H8	27.77	43.23	[CH2+]C(C)CC(C)(C)C	CC1CC1	C[C+](C)C	43.23	-43.23	27.77	30.53	-30.53	40.47	[CH2+]C(C)CC(C)(C)C	CC1CC1	C8H17+	C4H8
C8H17+	C7H14	44.65	26.35	[CH2+]C(C)CC(C)(C)C	CC(C)(C)CC=C	[CH3+]	26.35	-26.35	44.65	10.71	-10.71	60.29	[CH2+]C(C)CC(C)(C)C	CC(C)(C)CC=C	C8H17+	C7H14
C8H17+	C7H14	40.69	30.31	[CH2+]C(C)CC(C)(C)C	CC(C)(C)CC=C	[CH3+]	30.31	-30.31	40.69	14.67	-14.67	56.33	[CH2+]C(C)CC(C)(C)C	CC(C)(C)CC=C	C8H17+	C7H14
C8H17+	C8H16	28.94	42.06	[CH2+]C(C)CC(C)(C)C	C=C(C)CC(C)(C)C	[H+]	42.06	-42.06	28.94	10.9	-10.9	60.1	[CH2+]C(C)CC(C)(C)C	C=C(C)CC(C)(C)C	C8H17+	C8H16
C8H17+	C8H17+	34.77	36.23	[CH2+]C(C)CC(C)CC	C[C+](C)CC(C)CC		36.23	-36.23	34.77	43.61	-43.61	27.39	[CH2+]C(C)CC(C)CC	C[C+](C)CC(C)CC	C8H17+	C8H17+
C8H17+	C8H17+	52.68	18.32	[CH2+]C(C)CC(C)CC	C[C+](CC)CC(C)C		18.32	-18.32	52.68	25.32	-25.32	45.68	[CH2+]C(C)CC(C)CC	C[C+](CC)CC(C)C	C8H17+	C8H17+
C8H17+	C8H17+	31.74	39.26	[CH2+]C(C)CC(C)CC	CC(C)[CH+]C(C)CC		39.26	-39.26	31.74	42.27	-42.27	28.73	[CH2+]C(C)CC(C)CC	CC(C)[CH+]C(C)CC	C8H17+	C8H17+
C8H17+	C8H17+	57.14	13.86	[CH2+]C(C)CC(C)CC	C[CH+]C(C)CC(C)C		13.86	-13.86	57.14	16.12	-16.12	54.88	[CH2+]C(C)CC(C)CC	C[CH+]C(C)CC(C)C	C8H17+	C8H17+
C8H17+	C8H17+	54.59	16.41	[CH2+]C(C)CC(C)CC	[CH2+]C(CC)CC(C)C		16.41	-16.41	54.59	14.68	-14.68	56.32	[CH2+]C(C)CC(C)CC	[CH2+]C(CC)CC(C)C	C8H17+	C8H17+
C8H17+	C8H17+	53.45	17.55	[CH2+]C(C)CC(C)CC	CC(C)CC(C)C[CH2+]		17.55	-17.55	53.45	15.17	-15.17	55.83	[CH2+]C(C)CC(C)CC	CC(C)CC(C)C[CH2+]	C8H17+	C8H17+
C8H17+	C3H6	44.58	26.42	[CH2+]C(C)CC(C)CC	C=CC	[CH2+]C(C)CC	26.42	-26.42	44.58	12.57	-12.57	58.43	[CH2+]C(C)CC(C)CC	C=CC	C8H17+	C3H6
C8H17+	C3H6	40.49	30.51	[CH2+]C(C)CC(C)CC	C=CC	[CH2+]C(C)CC	30.51	-30.51	40.49	16.66	-16.66	54.34	[CH2+]C(C)CC(C)CC	C=CC	C8H17+	C3H6
C8H17+	C4H8	23.97	47.03	[CH2+]C(C)CC(C)CC	CC1CC1	C[CH+]CC	47.03	-47.03	23.97	29.85	-29.85	41.15	[CH2+]C(C)CC(C)CC	CC1CC1	C8H17+	C4H8
C8H17+	C7H14	39.29	31.71	[CH2+]C(C)CC(C)CC	CC(CC)CC=C	[CH3+]	31.71	-31.71	39.29	14.02	-14.02	56.98	[CH2+]C(C)CC(C)CC	CC(CC)CC=C	C8H17+	C7H14
C8H17+	C8H16	30.73	40.27	[CH2+]C(C)CC(C)CC	C=C(C)CC(C)CC	[H+]	40.27	-40.27	30.73	8.25	-8.25	62.75	[CH2+]C(C)CC(C)CC	C=C(C)CC(C)CC	C8H17+	C8H16
C8H17+	C8H17+	34.88	36.12	[CH2+]C(C)CCC(C)C	C[C+](C)CCC(C)C		36.12	-36.12	34.88	43.3	-43.3	27.7	[CH2+]C(C)CCC(C)C	C[C+](C)CCC(C)C	C8H17+	C8H17+
C8H17+	C8H17+	59.73	11.27	[CH2+]C(C)CCC(C)C	C[C+](C)CCC(C)C		11.27	-11.27	59.73	18.45	-18.45	52.55	[CH2+]C(C)CCC(C)C	C[C+](C)CCC(C)C	C8H17+	C8H17+
C8H17+	C8H17+	51.68	19.32	[CH2+]C(C)CCC(C)C	CC(C)[CH+]CC(C)C		19.32	-19.32	51.68	23.25	-23.25	47.75	[CH2+]C(C)CCC(C)C	CC(C)[CH+]CC(C)C	C8H17+	C8H17+
C8H17+	C8H17+	33.89	37.11	[CH2+]C(C)CCC(C)C	CC(C)[CH+]CC(C)C		37.11	-37.11	33.89	41.04	-41.04	29.96	[CH2+]C(C)CCC(C)C	CC(C)[CH+]CC(C)C	C8H17+	C8H17+
C8H17+	C3H6	45.92	25.08	[CH2+]C(C)CCC(C)C	C=CC	CC(C)C[CH2+]	25.08	-25.08	45.92	11.6	-11.6	59.4	[CH2+]C(C)CCC(C)C	C=CC	C8H17+	C3H6
C8H17+	C3H6	40.25	30.75	[CH2+]C(C)CCC(C)C	C=CC	CC(C)C[CH2+]	30.75	-30.75	40.25	17.27	-17.27	53.73	[CH2+]C(C)CCC(C)C	C=CC	C8H17+	C3H6
C8H17+	C7H14	43.17	27.83	[CH2+]C(C)CCC(C)C	CC(C)CCC=C	[CH3+]	27.83	-27.83	43.17	9.98	-9.98	61.02	[CH2+]C(C)CCC(C)C	CC(C)CCC=C	C8H17+	C7H14
C8H17+	C7H14	38.95	32.05	[CH2+]C(C)CCC(C)C	CC(C)CCC=C	[CH3+]	32.05	-32.05	38.95	14.2	-14.2	56.8	[CH2+]C(C)CCC(C)C	CC(C)CCC=C	C8H17+	C7H14
C8H17+	C8H16	30.94	40.06	[CH2+]C(C)CCC(C)C	C=C(C)CCC(C)C	[H+]	40.06	-40.06	30.94	7.99	-7.99	63.01	[CH2+]C(C)CCC(C)C	C=C(C)CCC(C)C	C8H17+	C8H16
C8H17+	C8H17+	36.8	34.2	[CH2+]C(CC)C(C)(C)C	C[C+](CC)C(C)(C)C		34.2	-34.2	36.8	42.87	-42.87	28.13	[CH2+]C(CC)C(C)(C)C	C[C+](CC)C(C)(C)C	C8H17+	C8H17+
C8H17+	C8H17+	39.18	31.82	[CH2+]C(CC)C(C)(C)C	C[CH+]C(C)C(C)(C)C		31.82	-31.82	39.18	38.78	-38.78	32.22	[CH2+]C(CC)C(C)(C)C	C[CH+]C(C)C(C)(C)C	C8H17+	C8H17+
C8H17+	C8H17+	51.5	19.5	[CH2+]C(CC)C(C)(C)C	CC(C[CH2+])C(C)(C)C		19.5	-19.5	51.5	21.58	-21.58	49.42	[CH2+]C(CC)C(C)(C)C	CC(C[CH2+])C(C)(C)C	C8H17+	C8H17+
C8H17+	C8H17+	49.51	21.49	[CH2+]C(CC)C(C)(C)C	CC(CC)C([CH2+])(C)C		21.49	-21.49	49.51	20.49	-20.49	50.51	[CH2+]C(CC)C(C)(C)C	CC(CC)C([CH2+])(C)C	C8H17+	C8H17+
C8H17+	C4H8	53.84	17.16	[CH2+]C(CC)C(C)(C)C	C=CCC	C[C+](C)C	17.16	-17.16	53.84	14.99	-14.99	56.01	[CH2+]C(CC)C(C)(C)C	C=CCC	C8H17+	C4H8
C8H17+	C4H8	46.92	24.08	[CH2+]C(CC)C(C)(C)C	C=CCC	C[C+](C)C	24.08	-24.08	46.92	21.91	-21.91	49.09	[CH2+]C(CC)C(C)(C)C	C=CCC	C8H17+	C4H8
C8H17+	C6H12	47.21	23.79	[CH2+]C(CC)C(C)(C)C	C=CC(C)(C)C	[CH2+]C	23.79	-23.79	47.21	15.08	-15.08	55.92	[CH2+]C(CC)C(C)(C)C	C=CC(C)(C)C	C8H17+	C6H12
C8H17+	C6H12	48.24	22.76	[CH2+]C(CC)C(C)(C)C	C=CC(C)(C)C	[CH2+]C	22.76	-22.76	48.24	14.05	-14.05	56.95	[CH2+]C(CC)C(C)(C)C	C=CC(C)(C)C	C8H17+	C6H12
C8H17+	C6H12	42.11	28.89	[CH2+]C(CC)C(C)(C)C	C=CC(C)(C)C	[CH2+]C	28.89	-28.89	42.11	20.18	-20.18	50.82	[CH2+]C(CC)C(C)(C)C	C=CC(C)(C)C	C8H17+	C6H12
C8H17+	C7H14	23.22	47.78	[CH2+]C(CC)C(C)(C)C	CC(C)(C)C1CC1	[CH3+]	47.78	-47.78	23.22	28.25	-28.25	42.75	[CH2+]C(CC)C(C)(C)C	CC(C)(C)C1CC1	C8H17+	C7H14
C8H17+	C8H16	32.49	38.51	[CH2+]C(CC)C(C)(C)C	C=C(CC)C(C)(C)C	[H+]	38.51	-38.51	32.49	7.08	-7.08	63.92	[CH2+]C(CC)C(C)(C)C	C=C(CC)C(C)(C)C	C8H17+	C8H16
C8H17+	C8H17+	36.23	34.77	[CH2+]C(CCC)C(C)C	C[C+](CCC)C(C)C		34.77	-34.77	36.23	44.66	-44.66	26.34	[CH2+]C(CCC)C(C)C	C[C+](CCC)C(C)C	C8H17+	C8H17+
C8H17+	C8H17+	38.25	32.75	[CH2+]C(CCC)C(C)C	C[C+](CCC)C(C)C		32.75	-32.75	38.25	42.64	-42.64	28.36	[CH2+]C(CCC)C(C)C	C[C+](CCC)C(C)C	C8H17+	C8H17+
C8H17+	C8H17+	39.36	31.64	[CH2+]C(CCC)C(C)C	C[C+](C)C(C)CCC		31.64	-31.64	39.36	39.75	-39.75	31.25	[CH2+]C(CCC)C(C)C	C[C+](C)C(C)CCC	C8H17+	C8H17+
C8H17+	C8H17+	37.42	33.58	[CH2+]C(CCC)C(C)C	CC[CH+]C(C)C(C)C		33.58	-33.58	37.42	41.17	-41.17	29.83	[CH2+]C(CCC)C(C)C	CC[CH+]C(C)C(C)C	C8H17+	C8H17+
C8H17+	C8H17+	54.54	16.46	[CH2+]C(CCC)C(C)C	CC(C)C(C)C[CH+]C		16.46	-16.46	54.54	22.9	-22.9	48.1	[CH2+]C(CCC)C(C)C	CC(C)C(C)C[CH+]C	C8H17+	C8H17+
C8H17+	C8H17+	50.46	20.54	[CH2+]C(CCC)C(C)C	[CH2+]C(C)C(C)CCC		20.54	-20.54	50.46	21.95	-21.95	49.05	[CH2+]C(CCC)C(C)C	[CH2+]C(C)C(C)CCC	C8H17+	C8H17+
C8H17+	C8H17+	58.58	12.42	[CH2+]C(CCC)C(C)C	CC(C)C(C)CC[CH2+]		12.42	-12.42	58.58	13.45	-13.45	57.55	[CH2+]C(CCC)C(C)C	CC(C)C(C)CC[CH2+]	C8H17+	C8H17+
C8H17+	C5H10	51.94	19.06	[CH2+]C(CCC)C(C)C	CCCC=C	C[CH+]C	19.06	-19.06	51.94	12.82	-12.82	58.18	[CH2+]C(CCC)C(C)C	CCCC=C	C8H17+	C5H10
C8H17+	C5H10	45.84	25.16	[CH2+]C(CCC)C(C)C	CCCC=C	C[CH+]C	25.16	-25.16	45.84	18.92	-18.92	52.08	[CH2+]C(CCC)C(C)C	CCCC=C	C8H17+	C5H10
C8H17+	C5H10	48.57	22.43	[CH2+]C(CCC)C(C)C	C=CC(C)C	[CH2+]CC	22.43	-22.43	48.57	13.55	-13.55	57.45	[CH2+]C(CCC)C(C)C	C=CC(C)C	C8H17+	C5H10
C8H17+	C5H10	42.04	28.96	[CH2+]C(CCC)C(C)C	C=CC(C)C	[CH2+]CC	28.96	-28.96	42.04	20.08	-20.08	50.92	[CH2+]C(CCC)C(C)C	C=CC(C)C	C8H17+	C5H10
C8H17+	C6H12	25.67	45.33	[CH2+]C(CCC)C(C)C	CC(C)C1CC1	[CH2+]C	45.33	-45.33	25.67	27.47	-27.47	43.53	[CH2+]C(CCC)C(C)C	CC(C)C1CC1	C8H17+	C6H12
C8H17+	C8H16	31.7	39.3	[CH2+]C(CCC)C(C)C	C=C(CCC)C(C)C	[H+]	39.3	-39.3	31.7	9.94	-9.94	61.06	[CH2+]C(CCC)C(C)C	C=C(CCC)C(C)C	C8H17+	C8H16
C8H17+	C8H17+	36.82	34.18	[CH2+]C(CCC)CCC	C[C+](CCC)CCC		34.18	-34.18	36.82	44.12	-44.12	26.88	[CH2+]C(CCC)CCC	C[C+](CCC)CCC	C8H17+	C8H17+
C8H17+	C8H17+	38.23	32.77	[CH2+]C(CCC)CCC	C[C+](CCC)CCC		32.77	-32.77	38.23	42.71	-42.71	28.29	[CH2+]C(CCC)CCC	C[C+](CCC)CCC	C8H17+	C8H17+
C8H17+	C8H17+	53.38	17.62	[CH2+]C(CCC)CCC	CC(C[CH+]C)CCC		17.62	-17.62	53.38	24.63	-24.63	46.37	[CH2+]C(CCC)CCC	CC(C[CH+]C)CCC	C8H17+	C8H17+
C8H17+	C8H17+	37.54	33.46	[CH2+]C(CCC)CCC	CC[CH+]C(C)CCC		33.46	-33.46	37.54	40.34	-40.34	30.66	[CH2+]C(CCC)CCC	CC[CH+]C(C)CCC	C8H17+	C8H17+
C8H17+	C8H17+	58.23	12.77	[CH2+]C(CCC)CCC	CC(CC[CH2+])CCC		12.77	-12.77	58.23	14.35	-14.35	56.65	[CH2+]C(CCC)CCC	CC(CC[CH2+])CCC	C8H17+	C8H17+
C8H17+	C5H10	48.94	22.06	[CH2+]C(CCC)CCC	CCCC=C	[CH2+]CC	22.06	-22.06	48.94	11.03	-11.03	59.97	[CH2+]C(CCC)CCC	CCCC=C	C8H17+	C5H10
C8H17+	C5H10	42.8	28.2	[CH2+]C(CCC)CCC	CCCC=C	[CH2+]CC	28.2	-28.2	42.8	17.17	-17.17	53.83	[CH2+]C(CCC)CCC	CCCC=C	C8H17+	C5H10
C8H17+	C6H12	25.51	45.49	[CH2+]C(CCC)CCC	CCCC1CC1	[CH2+]C	45.49	-45.49	25.51	27.67	-27.67	43.33	[CH2+]C(CCC)CCC	CCCC1CC1	C8H17+	C6H12
C8H17+	C8H16	31.44	39.56	[CH2+]C(CCC)CCC	C=C(CCC)CCC	[H+]	39.56	-39.56	31.44	8.8	-8.8	62.2	[CH2+]C(CCC)CCC	C=C(CCC)CCC	C8H17+	C8H16
C8H15+	C8H15+	35.4	35.6	[CH2+]C1CCCC(C)C1	C[C+]1CC(C)CCC1		35.6	-35.6	35.4	45.03	-45.03	25.97	[CH2+]C1CCCC(C)C1	C[C+]1CC(C)CCC1	C8H15+	C8H15+
C8H15+	C8H15+	38.21	32.79	[CH2+]C1CCCC(C)C1	C[C+]1CC(C)CCC1		32.79	-32.79	38.21	42.22	-42.22	28.78	[CH2+]C1CCCC(C)C1	C[C+]1CC(C)CCC1	C8H15+	C8H15+
C8H15+	C8H15+	31.59	39.41	[CH2+]C1CCCC(C)C1	CC1[CH+]C(C)CCC1		39.41	-39.41	31.59	42.81	-42.81	28.19	[CH2+]C1CCCC(C)C1	CC1[CH+]C(C)CCC1	C8H15+	C8H15+
C8H15+	C8H15+	45.08	25.92	[CH2+]C1CCCC(C)C1	CC1C[CH+]CC(C)C1		25.92	-25.92	45.08	28.4	-28.4	42.6	[CH2+]C1CCCC(C)C1	CC1C[CH+]CC(C)C1	C8H15+	C8H15+
C8H15+	C8H15+	30.83	40.17	[CH2+]C1CCCC(C)C1	CC1[CH+]CCC(C)C1		40.17	-40.17	30.83	42.43	-42.43	28.57	[CH2+]C1CCCC(C)C1	CC1[CH+]CCC(C)C1	C8H15+	C8H15+
C8H15+	C8H15+	26.77	44.23	[CH2+]C1CCCC(C)C1	CC1[CH+]CCC(C)C1		44.23	-44.23	26.77	46.49	-46.49	24.51	[CH2+]C1CCCC(C)C1	CC1[CH+]CCC(C)C1	C8H15+	C8H15+
C8H15+	C8H15+	45.22	25.78	[CH2+]C1CCCC(C)C1	[CH2+]C(C)CCCC=C		25.78	-25.78	45.22	7.26	-7.26	63.74	[CH2+]C1CCCC(C)C1	[CH2+]C(C)CCCC=C	C8H15+	C8H15+
C8H15+	C8H15+	39.72	31.28	[CH2+]C1CCCC(C)C1	[CH2+]C(C)CCCC=C		31.28	-31.28	39.72	12.76	-12.76	58.24	[CH2+]C1CCCC(C)C1	[CH2+]C(C)CCCC=C	C8H15+	C8H15+
C8H15+	C8H15+	37.98	33.02	[CH2+]C1CCCC(C)C1	CC(CC=C)CC[CH2+]		33.02	-33.02	37.98	14.22	-14.22	56.78	[CH2+]C1CCCC(C)C1	CC(CC=C)CC[CH2+]	C8H15+	C8H15+
C8H15+	C8H14	33.94	37.06	[CH2+]C1CCCC(C)C1	C=C1CC(C)CCC1	[H+]	37.06	-37.06	33.94	8.05	-8.05	62.95	[CH2+]C1CCCC(C)C1	C=C1CC(C)CCC1	C8H15+	C8H14
C8H15+	C8H15+	37.13	33.87	[CH2+]C1CCCCC1C	C[C+]1CCCCC1C		33.87	-33.87	37.13	41.25	-41.25	29.75	[CH2+]C1CCCCC1C	C[C+]1CCCCC1C	C8H15+	C8H15+
C8H15+	C8H15+	34.25	36.75	[CH2+]C1CCCCC1C	CC1C[CH+]CCC1C		36.75	-36.75	34.25	39.75	-39.75	31.25	[CH2+]C1CCCCC1C	CC1C[CH+]CCC1C	C8H15+	C8H15+
C8H15+	C8H15+	39.95	31.05	[CH2+]C1CCCCC1C	CC1C[CH+]CCC1C		31.05	-31.05	39.95	34.05	-34.05	36.95	[CH2+]C1CCCCC1C	CC1C[CH+]CCC1C	C8H15+	C8H15+
C8H15+	C8H15+	46.69	24.31	[CH2+]C1CCCCC1C	CC1C[CH+]CCC1C		24.31	-24.31	46.69	27.31	-27.31	43.69	[CH2+]C1CCCCC1C	CC1C[CH+]CCC1C	C8H15+	C8H15+
C8H15+	C8H15+	48.52	22.48	[CH2+]C1CCCCC1C	CC1C[CH+]CCC1C		22.48	-22.48	48.52	25.48	-25.48	45.52	[CH2+]C1CCCCC1C	CC1C[CH+]CCC1C	C8H15+	C8H15+
C8H15+	C8H15+	46.51	24.49	[CH2+]C1CCCCC1C	CC1[CH+]CCCC1C		24.49	-24.49	46.51	27.34	-27.34	43.66	[CH2+]C1CCCCC1C	CC1[CH+]CCCC1C	C8H15+	C8H15+
C8H15+	C8H15+	30.47	40.53	[CH2+]C1CCCCC1C	CC1[CH+]CCCC1C		40.53	-40.53	30.47	43.38	-43.38	27.62	[CH2+]C1CCCCC1C	CC1[CH+]CCCC1C	C8H15+	C8H15+
C8H15+	C8H15+	32.04	38.96	[CH2+]C1CCCCC1C	CC1[CH+]CCCC1C		38.96	-38.96	32.04	41.81	-41.81	29.19	[CH2+]C1CCCCC1C	CC1[CH+]CCCC1C	C8H15+	C8H15+
C8H15+	C8H15+	41.34	29.66	[CH2+]C1CCCCC1C	C=CCCCC[CH+]C		29.66	-29.66	41.34	12.24	-12.24	58.76	[CH2+]C1CCCCC1C	C=CCCCC[CH+]C	C8H15+	C8H15+
C8H15+	C8H15+	39.23	31.77	[CH2+]C1CCCCC1C	C=CC(C)CCC[CH2+]		31.77	-31.77	39.23	10.65	-10.65	60.35	[CH2+]C1CCCCC1C	C=CC(C)CCC[CH2+]	C8H15+	C8H15+
C8H15+	C8H14	32.44	38.56	[CH2+]C1CCCCC1C	C=C1CCCCC1C	[H+]	38.56	-38.56	32.44	7.92	-7.92	63.08	[CH2+]C1CCCCC1C	C=C1CCCCC1C	C8H15+	C8H14
C3H7+	C3H7+	32.49	38.51	[CH2+]CC	C[CH+]C		38.51	-38.51	32.49	42.61	-42.61	28.39	[CH2+]CC	C[CH+]C	C3H7+	C3H7+
C3H7+	C2H4	41.77	29.23	[CH2+]CC	C=C	[CH3+]	29.23	-29.23	41.77	7.87	-7.87	63.13	[CH2+]CC	C=C	C3H7+	C2H4
C3H7+	C2H4	38.53	32.47	[CH2+]CC	C=C	[CH3+]	32.47	-32.47	38.53	11.11	-11.11	59.89	[CH2+]CC	C=C	C3H7+	C2H4
C3H7+	C3H6	31.73	39.27	[CH2+]CC	C=CC	[H+]	39.27	-39.27	31.73	5.02	-5.02	65.98	[CH2+]CC	C=CC	C3H7+	C3H6
C8H17+	C8H17+	31.77	39.23	C[C+](C)C(C)(C)CC	CC(C)C(C)(C)[CH+]C		39.23	-39.23	31.77	35.98	-35.98	35.02	C[C+](C)C(C)(C)CC	CC(C)C(C)(C)[CH+]C	C8H17+	C8H17+
C8H17+	C8H17+	46.37	24.63	C[C+](C)C(C)(C)CC	CC(C)C(C)(C)C[CH2+]		24.63	-24.63	46.37	17.7	-17.7	53.3	C[C+](C)C(C)(C)CC	CC(C)C(C)(C)C[CH2+]	C8H17+	C8H17+
C8H17+	C8H17+	28.5	42.5	C[C+](C)C(C)(C)CC	[CH2+]C(C)C(C)(C)CC		42.5	-42.5	28.5	35.2	-35.2	35.8	C[C+](C)C(C)(C)CC	[CH2+]C(C)C(C)(C)CC	C8H17+	C8H17+
C8H17+	C8H17+	29.61	41.39	C[C+](C)C(C)(C)CC	CC(C)C([CH2+])(C)CC		41.39	-41.39	29.61	31.36	-31.36	39.64	C[C+](C)C(C)(C)CC	CC(C)C([CH2+])(C)CC	C8H17+	C8H17+
C8H17+	C6H12	45.28	25.72	C[C+](C)C(C)(C)CC	C/C(C)=C(\C)C	[CH2+]C	25.72	-25.72	45.28	12.87	-12.87	58.13	C[C+](C)C(C)(C)CC	C/C(C)=C(\C)C	C8H17+	C6H12
C8H17+	C6H12	39.86	31.14	C[C+](C)C(C)(C)CC	C/C(C)=C(\C)C	[CH2+]C	31.14	-31.14	39.86	18.29	-18.29	52.71	C[C+](C)C(C)(C)CC	C/C(C)=C(\C)C	C8H17+	C6H12
C8H17+	C7H14	43.59	27.41	C[C+](C)C(C)(C)CC	C/C(C)=C(/C)CC	[CH3+]	27.41	-27.41	43.59	10.62	-10.62	60.38	C[C+](C)C(C)(C)CC	C/C(C)=C(/C)CC	C8H17+	C7H14
C8H17+	C7H14	39.25	31.75	C[C+](C)C(C)(C)CC	C/C(C)=C(/C)CC	[CH3+]	31.75	-31.75	39.25	14.96	-14.96	56.04	C[C+](C)C(C)(C)CC	C/C(C)=C(/C)CC	C8H17+	C7H14
C8H17+	C8H16	33.16	37.84	C[C+](C)C(C)(C)CC	C=C(C)C(C)(C)CC	[H+]	37.84	-37.84	33.16	-0.21	0.21	71.21	C[C+](C)C(C)(C)CC	C=C(C)C(C)(C)CC	C8H17+	C8H16
C8H17+	C8H16	31.42	39.58	C[C+](C)C(C)(C)CC	C=C(C)C(C)(C)CC	[H+]	39.58	-39.58	31.42	1.53	-1.53	69.47	C[C+](C)C(C)(C)CC	C=C(C)C(C)(C)CC	C8H17+	C8H16
C8H17+	C8H17+	26.29	44.71	C[C+](C)CC(C)(C)C	CC(C)[CH+]C(C)(C)C		44.71	-44.71	26.29	40.29	-40.29	30.71	C[C+](C)CC(C)(C)C	CC(C)[CH+]C(C)(C)C	C8H17+	C8H17+
C8H17+	C8H17+	44.6	26.4	C[C+](C)CC(C)(C)C	CC(C)CC([CH2+])(C)C		26.4	-26.4	44.6	16.92	-16.92	54.08	C[C+](C)CC(C)(C)C	CC(C)CC([CH2+])(C)C	C8H17+	C8H17+
C8H17+	C4H8	50.59	20.41	C[C+](C)CC(C)(C)C	C=C(C)C	C[C+](C)C	20.41	-20.41	50.59	10.1	-10.1	60.9	C[C+](C)CC(C)(C)C	C=C(C)C	C8H17+	C4H8
C8H17+	C4H8	45.46	25.54	C[C+](C)CC(C)(C)C	C=C(C)C	C[C+](C)C	25.54	-25.54	45.46	15.23	-15.23	55.77	C[C+](C)CC(C)(C)C	C=C(C)C	C8H17+	C4H8
C8H17+	C8H17+	26.54	44.46	C[C+](C)CC(C)(C)C	[CH2+]C(C)CC(C)(C)C		44.46	-44.46	26.54	32.43	-32.43	38.57	C[C+](C)CC(C)(C)C	[CH2+]C(C)CC(C)(C)C	C8H17+	C8H17+
C8H17+	C8H16	31.3	39.7	C[C+](C)CC(C)(C)C	C=C(C)CC(C)(C)C	[H+]	39.7	-39.7	31.3	-0.03	0.03	71.03	C[C+](C)CC(C)(C)C	C=C(C)CC(C)(C)C	C8H17+	C8H16
C8H17+	C8H16	30.06	40.94	C[C+](C)CC(C)(C)C	C\C(C)=C/C(C)(C)C	[H+]	40.94	-40.94	30.06	0.49	-0.49	70.51	C[C+](C)CC(C)(C)C	C\C(C)=C/C(C)(C)C	C8H17+	C8H16
C8H17+	C8H16	28.14	42.86	C[C+](C)CC(C)(C)C	C\C(C)=C/C(C)(C)C	[H+]	42.86	-42.86	28.14	2.41	-2.41	68.59	C[C+](C)CC(C)(C)C	C\C(C)=C/C(C)(C)C	C8H17+	C8H16
C8H17+	C8H17+	33.17	37.83	C[C+](C)CC(C)CC	C[C+](CC)CC(C)C		37.83	-37.83	33.17	37.68	-37.68	33.32	C[C+](C)CC(C)CC	C[C+](CC)CC(C)C	C8H17+	C8H17+
C8H17+	C8H17+	29.07	41.93	C[C+](C)CC(C)CC	CC(C)[CH+]C(C)CC		41.93	-41.93	29.07	39.43	-39.43	31.57	C[C+](C)CC(C)CC	CC(C)[CH+]C(C)CC	C8H17+	C8H17+
C8H17+	C8H17+	44.86	26.14	C[C+](C)CC(C)CC	C[CH+]C(C)CC(C)C		26.14	-26.14	44.86	19.94	-19.94	51.06	C[C+](C)CC(C)CC	C[CH+]C(C)CC(C)C	C8H17+	C8H17+
C8H17+	C8H17+	45.83	25.17	C[C+](C)CC(C)CC	[CH2+]C(CC)CC(C)C		25.17	-25.17	45.83	17.98	-17.98	53.02	C[C+](C)CC(C)CC	[CH2+]C(CC)CC(C)C	C8H17+	C8H17+
C8H17+	C8H17+	52.99	18.01	C[C+](C)CC(C)CC	CC(C)CC(C)C[CH2+]		18.01	-18.01	52.99	10.26	-10.26	60.74	C[C+](C)CC(C)CC	CC(C)CC(C)C[CH2+]	C8H17+	C8H17+
C8H17+	C8H17+	27.49	43.51	C[C+](C)CC(C)CC	[CH2+]C(C)CC(C)CC		43.51	-43.51	27.49	34.15	-34.15	36.85	C[C+](C)CC(C)CC	[CH2+]C(C)CC(C)CC	C8H17+	C8H17+
C8H17+	C4H8	47.5	23.5	C[C+](C)CC(C)CC	C=C(C)C	C[CH+]CC	23.5	-23.5	47.5	10.1	-10.1	60.9	C[C+](C)CC(C)CC	C=C(C)C	C8H17+	C4H8
C8H17+	C4H8	42.76	28.24	C[C+](C)CC(C)CC	C=C(C)C	C[CH+]CC	28.24	-28.24	42.76	14.84	-14.84	56.16	C[C+](C)CC(C)CC	C=C(C)C	C8H17+	C4H8
C8H17+	C8H16	31.24	39.76	C[C+](C)CC(C)CC	C\C(C)=C/C(C)CC	[H+]	39.76	-39.76	31.24	4.63	-4.63	66.37	C[C+](C)CC(C)CC	C\C(C)=C/C(C)CC	C8H17+	C8H16
C8H17+	C8H16	32.49	38.51	C[C+](C)CC(C)CC	C=C(C)CC(C)CC	[H+]	38.51	-38.51	32.49	-2.6	2.6	73.6	C[C+](C)CC(C)CC	C=C(C)CC(C)CC	C8H17+	C8H16
C8H17+	C8H16	30.08	40.92	C[C+](C)CC(C)CC	C=C(C)CC(C)CC	[H+]	40.92	-40.92	30.08	-0.19	0.19	71.19	C[C+](C)CC(C)CC	C=C(C)CC(C)CC	C8H17+	C8H16
C8H17+	C8H17+	26.56	44.44	C[C+](CC)C(C)(C)C	C[CH+]C(C)C(C)(C)C		44.44	-44.44	26.56	42.95	-42.95	28.05	C[C+](CC)C(C)(C)C	C[CH+]C(C)C(C)(C)C	C8H17+	C8H17+
C8H17+	C8H17+	30.29	40.71	C[C+](CC)C(C)(C)C	CC(C[CH2+])C(C)(C)C		40.71	-40.71	30.29	34.44	-34.44	36.56	C[C+](CC)C(C)(C)C	CC(C[CH2+])C(C)(C)C	C8H17+	C8H17+
C8H17+	C8H17+	29.98	41.02	C[C+](CC)C(C)(C)C	CC(CC)C([CH2+])(C)C		41.02	-41.02	29.98	34.19	-34.19	36.81	C[C+](CC)C(C)(C)C	CC(CC)C([CH2+])(C)C	C8H17+	C8H17+
C8H17+	C8H17+	28.31	42.69	C[C+](CC)C(C)(C)C	[CH2+]C(CC)C(C)(C)C		42.69	-42.69	28.31	34.29	-34.29	36.71	C[C+](CC)C(C)(C)C	[CH2+]C(CC)C(C)(C)C	C8H17+	C8H17+
C8H17+	C7H14	42.87	28.13	C[C+](CC)C(C)(C)C	C/C(C)=C(/C)CC	[CH3+]	28.13	-28.13	42.87	11.49	-11.49	59.51	C[C+](CC)C(C)(C)C	C/C(C)=C(/C)CC	C8H17+	C7H14
C8H17+	C7H14	39.24	31.76	C[C+](CC)C(C)(C)C	C/C(C)=C(/C)CC	[CH3+]	31.76	-31.76	39.24	15.12	-15.12	55.88	C[C+](CC)C(C)(C)C	C/C(C)=C(/C)CC	C8H17+	C7H14
C8H17+	C7H14	43.27	27.73	C[C+](CC)C(C)(C)C	C=C(C)C(C)(C)C	[CH3+]	27.73	-27.73	43.27	7.8	-7.8	63.2	C[C+](CC)C(C)(C)C	C=C(C)C(C)(C)C	C8H17+	C7H14
C8H17+	C7H14	39.96	31.04	C[C+](CC)C(C)(C)C	C=C(C)C(C)(C)C	[CH3+]	31.04	-31.04	39.96	11.11	-11.11	59.89	C[C+](CC)C(C)(C)C	C=C(C)C(C)(C)C	C8H17+	C7H14
C8H17+	C8H16	31.96	39.04	C[C+](CC)C(C)(C)C	C\C=C(/C)C(C)(C)C	[H+]	39.04	-39.04	31.96	3.22	-3.22	67.78	C[C+](CC)C(C)(C)C	C\C=C(/C)C(C)(C)C	C8H17+	C8H16
C8H17+	C8H16	29.81	41.19	C[C+](CC)C(C)(C)C	C=C(CC)C(C)(C)C	[H+]	41.19	-41.19	29.81	1.3	-1.3	69.7	C[C+](CC)C(C)(C)C	C=C(CC)C(C)(C)C	C8H17+	C8H16
C8H17+	C8H17+	30.29	40.71	C[C+](CC)C(C)CC	C[CH+]C(C)C(C)CC		40.71	-40.71	30.29	36.85	-36.85	34.15	C[C+](CC)C(C)CC	C[CH+]C(C)C(C)CC	C8H17+	C8H17+
C8H17+	C8H17+	29.11	41.89	C[C+](CC)C(C)CC	C[CH+]C(C)C(C)CC		41.89	-41.89	29.11	38.03	-38.03	32.97	C[C+](CC)C(C)CC	C[CH+]C(C)C(C)CC	C8H17+	C8H17+
C8H17+	C8H17+	44.91	26.09	C[C+](CC)C(C)CC	CC(C[CH2+])C(C)CC		26.09	-26.09	44.91	15.85	-15.85	55.15	C[C+](CC)C(C)CC	CC(C[CH2+])C(C)CC	C8H17+	C8H17+
C8H17+	C8H17+	28.1	42.9	C[C+](CC)C(C)CC	CC(C[CH2+])C(C)CC		42.9	-42.9	28.1	32.66	-32.66	38.34	C[C+](CC)C(C)CC	CC(C[CH2+])C(C)CC	C8H17+	C8H17+
C8H17+	C8H17+	29.32	41.68	C[C+](CC)C(C)CC	[CH2+]C(CC)C(C)CC		41.68	-41.68	29.32	31.12	-31.12	39.88	C[C+](CC)C(C)CC	[CH2+]C(CC)C(C)CC	C8H17+	C8H17+
C8H17+	C8H17+	27.07	43.93	C[C+](CC)C(C)CC	[CH2+]C(CC)C(C)CC		43.93	-43.93	27.07	33.37	-33.37	37.63	C[C+](CC)C(C)CC	[CH2+]C(CC)C(C)CC	C8H17+	C8H17+
C8H17+	C6H12	44.83	26.17	C[C+](CC)C(C)CC	C\C=C(/C)CC	[CH2+]C	26.17	-26.17	44.83	10.68	-10.68	60.32	C[C+](CC)C(C)CC	C\C=C(/C)CC	C8H17+	C6H12
C8H17+	C6H12	39.72	31.28	C[C+](CC)C(C)CC	C\C=C(/C)CC	[CH2+]C	31.28	-31.28	39.72	15.79	-15.79	55.21	C[C+](CC)C(C)CC	C\C=C(/C)CC	C8H17+	C6H12
C8H17+	C7H14	42.69	28.31	C[C+](CC)C(C)CC	CC\C=C(/C)CC	[CH3+]	28.31	-28.31	42.69	9.68	-9.68	61.32	C[C+](CC)C(C)CC	CC\C=C(/C)CC	C8H17+	C7H14
C8H17+	C7H14	38.82	32.18	C[C+](CC)C(C)CC	CC\C=C(/C)CC	[CH3+]	32.18	-32.18	38.82	13.55	-13.55	57.45	C[C+](CC)C(C)CC	CC\C=C(/C)CC	C8H17+	C7H14
C8H17+	C7H14	42.95	28.05	C[C+](CC)C(C)CC	C=C(C)C(C)CC	[CH3+]	28.05	-28.05	42.95	7.55	-7.55	63.45	C[C+](CC)C(C)CC	C=C(C)C(C)CC	C8H17+	C7H14
C8H17+	C7H14	39.72	31.28	C[C+](CC)C(C)CC	C=C(C)C(C)CC	[CH3+]	31.28	-31.28	39.72	10.78	-10.78	60.22	C[C+](CC)C(C)CC	C=C(C)C(C)CC	C8H17+	C7H14
C8H17+	C8H16	34.21	36.79	C[C+](CC)C(C)CC	C\C=C(/C)C(C)CC	[H+]	36.79	-36.79	34.21	0.52	-0.52	70.48	C[C+](CC)C(C)CC	C\C=C(/C)C(C)CC	C8H17+	C8H16
C8H17+	C8H16	32.13	38.87	C[C+](CC)C(C)CC	C\C=C(/C)C(C)CC	[H+]	38.87	-38.87	32.13	2.6	-2.6	68.4	C[C+](CC)C(C)CC	C\C=C(/C)C(C)CC	C8H17+	C8H16
C8H17+	C8H16	32.6	38.4	C[C+](CC)C(C)CC	C/C(CC)=C(/C)CC	[H+]	38.4	-38.4	32.6	2.05	-2.05	68.95	C[C+](CC)C(C)CC	C/C(CC)=C(/C)CC	C8H17+	C8H16
C8H17+	C8H16	26.99	44.01	C[C+](CC)C(C)CC	C/C(CC)=C(/C)CC	[H+]	44.01	-44.01	26.99	7.66	-7.66	63.34	C[C+](CC)C(C)CC	C/C(CC)=C(/C)CC	C8H17+	C8H16
C8H17+	C8H16	30.84	40.16	C[C+](CC)C(C)CC	C=C(CC)C(C)CC	[H+]	40.16	-40.16	30.84	0.98	-0.98	70.02	C[C+](CC)C(C)CC	C=C(CC)C(C)CC	C8H17+	C8H16
C8H17+	C8H17+	33.23	37.77	C[C+](CC)CC(C)C	C[C+](C)CC(C)CC		37.77	-37.77	33.23	38.06	-38.06	32.94	C[C+](CC)CC(C)C	C[C+](C)CC(C)CC	C8H17+	C8H17+
C8H17+	C8H17+	28.58	42.42	C[C+](CC)CC(C)C	C[CH+]C(C)CC(C)C		42.42	-42.42	28.58	40.07	-40.07	30.93	C[C+](CC)CC(C)C	C[CH+]C(C)CC(C)C	C8H17+	C8H17+
C8H17+	C8H17+	28.17	42.83	C[C+](CC)CC(C)C	CC(C)[CH+]C(C)CC		42.83	-42.83	28.17	38.36	-38.36	32.64	C[C+](CC)CC(C)C	CC(C)[CH+]C(C)CC	C8H17+	C8H17+
C8H17+	C8H17+	26.88	44.12	C[C+](CC)CC(C)C	CC(C)CC(C)C[CH2+]		44.12	-44.12	26.88	37.35	-37.35	33.65	C[C+](CC)CC(C)C	CC(C)CC(C)C[CH2+]	C8H17+	C8H17+
C8H17+	C8H17+	45.35	25.65	C[C+](CC)CC(C)C	[CH2+]C(C)CC(C)CC		25.65	-25.65	45.35	18.37	-18.37	52.63	C[C+](CC)CC(C)C	[CH2+]C(C)CC(C)CC	C8H17+	C8H17+
C8H17+	C8H17+	26.86	44.14	C[C+](CC)CC(C)C	[CH2+]C(CC)CC(C)C		44.14	-44.14	26.86	32.47	-32.47	38.53	C[C+](CC)CC(C)C	[CH2+]C(CC)CC(C)C	C8H17+	C8H17+
C8H17+	C5H10	46.81	24.19	C[C+](CC)CC(C)C	C=C(C)CC	C[CH+]C	24.19	-24.19	46.81	9.85	-9.85	61.15	C[C+](CC)CC(C)C	C=C(C)CC	C8H17+	C5H10
C8H17+	C5H10	42.84	28.16	C[C+](CC)CC(C)C	C=C(C)CC	C[CH+]C	28.16	-28.16	42.84	13.82	-13.82	57.18	C[C+](CC)CC(C)C	C=C(C)CC	C8H17+	C5H10
C8H17+	C7H14	41.29	29.71	C[C+](CC)CC(C)C	C=C(C)CC(C)C	[CH3+]	29.71	-29.71	41.29	7.91	-7.91	63.09	C[C+](CC)CC(C)C	C=C(C)CC(C)C	C8H17+	C7H14
C8H17+	C7H14	38.49	32.51	C[C+](CC)CC(C)C	C=C(C)CC(C)C	[CH3+]	32.51	-32.51	38.49	10.71	-10.71	60.29	C[C+](CC)CC(C)C	C=C(C)CC(C)C	C8H17+	C7H14
C8H17+	C8H16	30.13	40.87	C[C+](CC)CC(C)C	C\C(CC)=C/C(C)C	[H+]	40.87	-40.87	30.13	5.11	-5.11	65.89	C[C+](CC)CC(C)C	C\C(CC)=C/C(C)C	C8H17+	C8H16
C8H17+	C8H16	30.9	40.1	C[C+](CC)CC(C)C	C\C=C(/C)CC(C)C	[H+]	40.1	-40.1	30.9	3.07	-3.07	67.93	C[C+](CC)CC(C)C	C\C=C(/C)CC(C)C	C8H17+	C8H16
C8H17+	C8H16	31.72	39.28	C[C+](CC)CC(C)C	C=C(CC)CC(C)C	[H+]	39.28	-39.28	31.72	-0.14	0.14	71.14	C[C+](CC)CC(C)C	C=C(CC)CC(C)C	C8H17+	C8H16
C8H17+	C8H17+	29.19	41.81	C[C+](CCC)C(C)C	C[C+](C)C(C)CCC		41.81	-41.81	29.19	41.28	-41.28	29.72	C[C+](CCC)C(C)C	C[C+](C)C(C)CCC	C8H17+	C8H17+
C8H17+	C8H17+	26.93	44.07	C[C+](CCC)C(C)C	CC[CH+]C(C)C(C)C		44.07	-44.07	26.93	41.87	-41.87	29.13	C[C+](CCC)C(C)C	CC[CH+]C(C)C(C)C	C8H17+	C8H17+
C8H17+	C8H17+	31.76	39.24	C[C+](CCC)C(C)C	CC(C)C(C)C[CH+]C		39.24	-39.24	31.76	35.98	-35.98	35.02	C[C+](CCC)C(C)C	CC(C)C(C)C[CH+]C	C8H17+	C8H17+
C8H17+	C8H17+	27.65	43.35	C[C+](CCC)C(C)C	[CH2+]C(CCC)C(C)C		43.35	-43.35	27.65	36.16	-36.16	34.84	C[C+](CCC)C(C)C	[CH2+]C(CCC)C(C)C	C8H17+	C8H17+
C8H17+	C8H17+	44.53	26.47	C[C+](CCC)C(C)C	CC(C)C(C)CC[CH2+]		26.47	-26.47	44.53	18.71	-18.71	52.29	C[C+](CCC)C(C)C	CC(C)C(C)CC[CH2+]	C8H17+	C8H17+
C8H17+	C8H17+	29.21	41.79	C[C+](CCC)C(C)C	[CH2+]C(C)C(C)CCC		41.79	-41.79	29.21	33.93	-33.93	37.07	C[C+](CCC)C(C)C	[CH2+]C(C)C(C)CCC	C8H17+	C8H17+
C8H17+	C6H12	45.36	25.64	C[C+](CCC)C(C)C	C=C(C)C(C)C	[CH2+]C	25.64	-25.64	45.36	8.48	-8.48	62.52	C[C+](CCC)C(C)C	C=C(C)C(C)C	C8H17+	C6H12
C8H17+	C6H12	40.38	30.62	C[C+](CCC)C(C)C	C=C(C)C(C)C	[CH2+]C	30.62	-30.62	40.38	13.46	-13.46	57.54	C[C+](CCC)C(C)C	C=C(C)C(C)C	C8H17+	C6H12
C8H17+	C7H14	43.22	27.78	C[C+](CCC)C(C)C	C\C=C(/C)CCC	[CH3+]	27.78	-27.78	43.22	9.63	-9.63	61.37	C[C+](CCC)C(C)C	C\C=C(/C)CCC	C8H17+	C7H14
C8H17+	C7H14	41.82	29.18	C[C+](CCC)C(C)C	C\C=C(/C)CCC	[CH3+]	29.18	-29.18	41.82	11.03	-11.03	59.97	C[C+](CCC)C(C)C	C\C=C(/C)CCC	C8H17+	C7H14
C8H17+	C7H14	38.79	32.21	C[C+](CCC)C(C)C	C\C=C(/C)CCC	[CH3+]	32.21	-32.21	38.79	14.06	-14.06	56.94	C[C+](CCC)C(C)C	C\C=C(/C)CCC	C8H17+	C7H14
C8H17+	C8H16	29.82	41.18	C[C+](CCC)C(C)C	CC\C=C(/C)C(C)C	[H+]	41.18	-41.18	29.82	5.6	-5.6	65.4	C[C+](CCC)C(C)C	CC\C=C(/C)C(C)C	C8H17+	C8H16
C8H17+	C8H16	33.65	37.35	C[C+](CCC)C(C)C	C/C(C)=C(/C)CCC	[H+]	37.35	-37.35	33.65	1.39	-1.39	69.61	C[C+](CCC)C(C)C	C/C(C)=C(/C)CCC	C8H17+	C8H16
C8H17+	C8H16	29.64	41.36	C[C+](CCC)C(C)C	C/C(C)=C(/C)CCC	[H+]	41.36	-41.36	29.64	5.4	-5.4	65.6	C[C+](CCC)C(C)C	C/C(C)=C(/C)CCC	C8H17+	C8H16
C8H17+	C8H16	31.51	39.49	C[C+](CCC)C(C)C	C=C(CCC)C(C)C	[H+]	39.49	-39.49	31.51	-0.12	0.12	71.12	C[C+](CCC)C(C)C	C=C(CCC)C(C)C	C8H17+	C8H16
C8H17+	C8H17+	29.41	41.59	C[C+](CCC)CCC	CC[CH+]C(C)CCC		41.59	-41.59	29.41	39.67	-39.67	31.33	C[C+](CCC)CCC	CC[CH+]C(C)CCC	C8H17+	C8H17+
C8H17+	C8H17+	32.41	38.59	C[C+](CCC)CCC	CC(C[CH+]C)CCC		38.59	-38.59	32.41	36.56	-36.56	34.44	C[C+](CCC)CCC	CC(C[CH+]C)CCC	C8H17+	C8H17+
C8H17+	C8H17+	43.94	27.06	C[C+](CCC)CCC	CC(CC[CH2+])CCC		27.06	-27.06	43.94	19.95	-19.95	51.05	C[C+](CCC)CCC	CC(CC[CH2+])CCC	C8H17+	C8H17+
C8H17+	C8H17+	25.33	45.67	C[C+](CCC)CCC	[CH2+]C(CCC)CCC		45.67	-45.67	25.33	38.03	-38.03	32.97	C[C+](CCC)CCC	[CH2+]C(CCC)CCC	C8H17+	C8H17+
C8H17+	C6H12	43.97	27.03	C[C+](CCC)CCC	C=C(C)CCC	[CH2+]C	27.03	-27.03	43.97	8.64	-8.64	62.36	C[C+](CCC)CCC	C=C(C)CCC	C8H17+	C6H12
C8H17+	C6H12	42.93	28.07	C[C+](CCC)CCC	C=C(C)CCC	[CH2+]C	28.07	-28.07	42.93	9.68	-9.68	61.32	C[C+](CCC)CCC	C=C(C)CCC	C8H17+	C6H12
C8H17+	C6H12	39.67	31.33	C[C+](CCC)CCC	C=C(C)CCC	[CH2+]C	31.33	-31.33	39.67	12.94	-12.94	58.06	C[C+](CCC)CCC	C=C(C)CCC	C8H17+	C6H12
C8H17+	C8H16	33.4	37.6	C[C+](CCC)CCC	CC\C=C(/C)CCC	[H+]	37.6	-37.6	33.4	0.92	-0.92	70.08	C[C+](CCC)CCC	CC\C=C(/C)CCC	C8H17+	C8H16
C8H17+	C8H16	28.03	42.97	C[C+](CCC)CCC	CC\C=C(/C)CCC	[H+]	42.97	-42.97	28.03	6.29	-6.29	64.71	C[C+](CCC)CCC	CC\C=C(/C)CCC	C8H17+	C8H16
C8H17+	C8H16	31.25	39.75	C[C+](CCC)CCC	C=C(CCC)CCC	[H+]	39.75	-39.75	31.25	0.72	-0.72	70.28	C[C+](CCC)CCC	C=C(CCC)CCC	C8H17+	C8H16
C8H15+	C8H15+	24.87	46.13	C[C+]1CC(C)CCC1	CC1C[CH+]CC(C)C1		46.13	-46.13	24.87	43.14	-43.14	27.86	C[C+]1CC(C)CCC1	CC1C[CH+]CC(C)C1	C8H15+	C8H15+
C8H15+	C8H15+	27.06	43.94	C[C+]1CC(C)CCC1	CC1[CH+]C(C)CCC1		43.94	-43.94	27.06	40.51	-40.51	30.49	C[C+]1CC(C)CCC1	CC1[CH+]C(C)CCC1	C8H15+	C8H15+
C8H15+	C8H15+	27.73	43.27	C[C+]1CC(C)CCC1	CC1[CH+]CCC(C)C1		43.27	-43.27	27.73	37.78	-37.78	33.22	C[C+]1CC(C)CCC1	CC1[CH+]CCC(C)C1	C8H15+	C8H15+
C8H15+	C8H15+	28.7	42.3	C[C+]1CC(C)CCC1	[CH2+]C1CCCC(C)C1		42.3	-42.3	28.7	35.54	-35.54	35.46	C[C+]1CC(C)CCC1	[CH2+]C1CCCC(C)C1	C8H15+	C8H15+
C8H15+	C8H14	34.74	36.26	C[C+]1CC(C)CCC1	CC=1CC(C)CCC=1	[H+]	36.26	-36.26	34.74	0.74	-0.74	70.26	C[C+]1CC(C)CCC1	CC=1CC(C)CCC=1	C8H15+	C8H14
C8H15+	C8H14	31.04	39.96	C[C+]1CC(C)CCC1	CC=1CC(C)CCC=1	[H+]	39.96	-39.96	31.04	4.44	-4.44	66.56	C[C+]1CC(C)CCC1	CC=1CC(C)CCC=1	C8H15+	C8H14
C8H15+	C8H14	34.87	36.13	C[C+]1CC(C)CCC1	CC1=CC(C)CCC1	[H+]	36.13	-36.13	34.87	0.13	-0.13	70.87	C[C+]1CC(C)CCC1	CC1=CC(C)CCC1	C8H15+	C8H14
C8H15+	C8H14	31.67	39.33	C[C+]1CC(C)CCC1	CC1=CC(C)CCC1	[H+]	39.33	-39.33	31.67	3.33	-3.33	67.67	C[C+]1CC(C)CCC1	CC1=CC(C)CCC1	C8H15+	C8H14
C8H15+	C8H14	32.78	38.22	C[C+]1CC(C)CCC1	C=C1CC(C)CCC1	[H+]	38.22	-38.22	32.78	-0.36	0.36	71.36	C[C+]1CC(C)CCC1	C=C1CC(C)CCC1	C8H15+	C8H14
C8H15+	C8H14	31.32	39.68	C[C+]1CC(C)CCC1	C=C1CC(C)CCC1	[H+]	39.68	-39.68	31.32	1.1	-1.1	69.9	C[C+]1CC(C)CCC1	C=C1CC(C)CCC1	C8H15+	C8H14
C8H15+	C8H15+	26.24	44.76	C[C+]1CCCCC1C	CC1[CH+]CCCC1C		44.76	-44.76	26.24	42.25	-42.25	28.75	C[C+]1CCCCC1C	CC1[CH+]CCCC1C	C8H15+	C8H15+
C8H15+	C8H15+	28.72	42.28	C[C+]1CCCCC1C	CC1[CH+]CCCC1C		42.28	-42.28	28.72	39.77	-39.77	31.23	C[C+]1CCCCC1C	CC1[CH+]CCCC1C	C8H15+	C8H15+
C8H15+	C8H15+	24.64	46.36	C[C+]1CCCCC1C	CC1[CH+]CCCC1C		46.36	-46.36	24.64	43.85	-43.85	27.15	C[C+]1CCCCC1C	CC1[CH+]CCCC1C	C8H15+	C8H15+
C8H15+	C8H15+	25.16	45.84	C[C+]1CCCCC1C	CC1C[CH+]CCC1C		45.84	-45.84	25.16	43.28	-43.28	27.72	C[C+]1CCCCC1C	CC1C[CH+]CCC1C	C8H15+	C8H15+
C8H15+	C8H15+	26.87	44.13	C[C+]1CCCCC1C	[CH2+]C1CCCCC1C		44.13	-44.13	26.87	36.75	-36.75	34.25	C[C+]1CCCCC1C	[CH2+]C1CCCCC1C	C8H15+	C8H15+
C8H15+	C8H15+	25.34	45.66	C[C+]1CCCCC1C	[CH2+]C1CCCCC1C		45.66	-45.66	25.34	38.28	-38.28	32.72	C[C+]1CCCCC1C	[CH2+]C1CCCCC1C	C8H15+	C8H15+
C8H15+	C7H12	41.72	29.28	C[C+]1CCCCC1C	CC=1CCCCC=1	[CH3+]	29.28	-29.28	41.72	10.93	-10.93	60.07	C[C+]1CCCCC1C	CC=1CCCCC=1	C8H15+	C7H12
C8H15+	C7H12	37.31	33.69	C[C+]1CCCCC1C	CC=1CCCCC=1	[CH3+]	33.69	-33.69	37.31	15.34	-15.34	55.66	C[C+]1CCCCC1C	CC=1CCCCC=1	C8H15+	C7H12
C8H15+	C8H14	36.32	34.68	C[C+]1CCCCC1C	CC=1CCCCC=1C	[H+]	34.68	-34.68	36.32	0.7	-0.7	70.3	C[C+]1CCCCC1C	CC=1CCCCC=1C	C8H15+	C8H14
C8H15+	C8H14	30.25	40.75	C[C+]1CCCCC1C	CC=1CCCCC=1C	[H+]	40.75	-40.75	30.25	6.77	-6.77	64.23	C[C+]1CCCCC1C	CC=1CCCCC=1C	C8H15+	C8H14
C8H15+	C8H14	35.44	35.56	C[C+]1CCCCC1C	CC1=CCCCC1C	[H+]	35.56	-35.56	35.44	-0.19	0.19	71.19	C[C+]1CCCCC1C	CC1=CCCCC1C	C8H15+	C8H14
C8H15+	C8H14	32.57	38.43	C[C+]1CCCCC1C	C=C1CCCCC1C	[H+]	38.43	-38.43	32.57	0.45	-0.45	70.55	C[C+]1CCCCC1C	C=C1CCCCC1C	C8H15+	C8H14
C8H15+	C8H14	31.53	39.47	C[C+]1CCCCC1C	C=C1CCCCC1C	[H+]	39.47	-39.47	31.53	1.49	-1.49	69.51	C[C+]1CCCCC1C	C=C1CCCCC1C	C8H15+	C8H14
C8H17+	C8H17+	32.78	38.22	C[CH+]C(C)C(C)(C)C	C[C+](CC)C(C)(C)C		38.22	-38.22	32.78	40.91	-40.91	30.09	C[CH+]C(C)C(C)(C)C	C[C+](CC)C(C)(C)C	C8H17+	C8H17+
C8H17+	C8H17+	29.49	41.51	C[CH+]C(C)C(C)(C)C	C[C+](CC)C(C)(C)C		41.51	-41.51	29.49	44.2	-44.2	26.8	C[CH+]C(C)C(C)(C)C	C[C+](CC)C(C)(C)C	C8H17+	C8H17+
C8H17+	C8H17+	28.92	42.08	C[CH+]C(C)C(C)(C)C	CC(C[CH2+])C(C)(C)C		42.08	-42.08	28.92	38.84	-38.84	32.16	C[CH+]C(C)C(C)(C)C	CC(C[CH2+])C(C)(C)C	C8H17+	C8H17+
C8H17+	C4H8	52.44	18.56	C[CH+]C(C)C(C)(C)C	C\C=C/C	C[C+](C)C	18.56	-18.56	52.44	13.71	-13.71	57.29	C[CH+]C(C)C(C)(C)C	C\C=C/C	C8H17+	C4H8
C8H17+	C4H8	46.06	24.94	C[CH+]C(C)C(C)(C)C	C\C=C/C	C[C+](C)C	24.94	-24.94	46.06	20.09	-20.09	50.91	C[CH+]C(C)C(C)(C)C	C\C=C/C	C8H17+	C4H8
C8H17+	C8H17+	29.54	41.46	C[CH+]C(C)C(C)(C)C	[CH2+]C(CC)C(C)(C)C		41.46	-41.46	29.54	36.02	-36.02	34.98	C[CH+]C(C)C(C)(C)C	[CH2+]C(CC)C(C)(C)C	C8H17+	C8H17+
C8H17+	C8H17+	47.41	23.59	C[CH+]C(C)C(C)(C)C	CC(CC)C([CH2+])(C)C		23.59	-23.59	47.41	16.93	-16.93	54.07	C[CH+]C(C)C(C)(C)C	CC(CC)C([CH2+])(C)C	C8H17+	C8H17+
C8H17+	C7H14	40.45	30.55	C[CH+]C(C)C(C)(C)C	C\C=C\C(C)(C)C	[CH3+]	30.55	-30.55	40.45	16.83	-16.83	54.17	C[CH+]C(C)C(C)(C)C	C\C=C\C(C)(C)C	C8H17+	C7H14
C8H17+	C7H14	44.66	26.34	C[CH+]C(C)C(C)(C)C	C\C=C\C(C)(C)C	[CH3+]	26.34	-26.34	44.66	12.62	-12.62	58.38	C[CH+]C(C)C(C)(C)C	C\C=C\C(C)(C)C	C8H17+	C7H14
C8H17+	C8H16	35.71	35.29	C[CH+]C(C)C(C)(C)C	C\C=C(/C)C(C)(C)C	[H+]	35.29	-35.29	35.71	2.54	-2.54	68.46	C[CH+]C(C)C(C)(C)C	C\C=C(/C)C(C)(C)C	C8H17+	C8H16
C8H17+	C8H16	31.18	39.82	C[CH+]C(C)C(C)(C)C	C\C=C(/C)C(C)(C)C	[H+]	39.82	-39.82	31.18	7.07	-7.07	63.93	C[CH+]C(C)C(C)(C)C	C\C=C(/C)C(C)(C)C	C8H17+	C8H16
C8H17+	C8H16	31.35	39.65	C[CH+]C(C)C(C)(C)C	C=CC(C)C(C)(C)C	[H+]	39.65	-39.65	31.35	2	-2	69	C[CH+]C(C)C(C)(C)C	C=CC(C)C(C)(C)C	C8H17+	C8H16
C8H17+	C8H17+	36.99	34.01	C[CH+]C(C)C(C)CC	C[C+](CC)C(C)CC		34.01	-34.01	36.99	40.51	-40.51	30.49	C[CH+]C(C)C(C)CC	C[C+](CC)C(C)CC	C8H17+	C8H17+
C8H17+	C8H17+	34.99	36.01	C[CH+]C(C)C(C)CC	C[C+](CC)C(C)CC		36.01	-36.01	34.99	42.51	-42.51	28.49	C[CH+]C(C)C(C)CC	C[C+](CC)C(C)CC	C8H17+	C8H17+
C8H17+	C8H17+	48.41	22.59	C[CH+]C(C)C(C)CC	[CH2+]C(CC)C(C)CC		22.59	-22.59	48.41	21.79	-21.79	49.21	C[CH+]C(C)C(C)CC	[CH2+]C(CC)C(C)CC	C8H17+	C8H17+
C8H17+	C8H17+	33.33	37.67	C[CH+]C(C)C(C)CC	[CH2+]C(CC)C(C)CC		37.67	-37.67	33.33	36.87	-36.87	34.13	C[CH+]C(C)C(C)CC	[CH2+]C(CC)C(C)CC	C8H17+	C8H17+
C8H17+	C8H17+	56.19	14.81	C[CH+]C(C)C(C)CC	CC(C[CH2+])C(C)CC		14.81	-14.81	56.19	10.71	-10.71	60.29	C[CH+]C(C)C(C)CC	CC(C[CH2+])C(C)CC	C8H17+	C8H17+
C8H17+	C8H17+	27.97	43.03	C[CH+]C(C)C(C)CC	CC(C[CH2+])C(C)CC		43.03	-43.03	27.97	38.93	-38.93	32.07	C[CH+]C(C)C(C)CC	CC(C[CH2+])C(C)CC	C8H17+	C8H17+
C8H17+	C4H8	50.59	20.41	C[CH+]C(C)C(C)CC	C\C=C/C	C[CH+]CC	20.41	-20.41	50.59	13.04	-13.04	57.96	C[CH+]C(C)C(C)CC	C\C=C/C	C8H17+	C4H8
C8H17+	C4H8	49.5	21.5	C[CH+]C(C)C(C)CC	C\C=C/C	C[CH+]CC	21.5	-21.5	49.5	14.13	-14.13	56.87	C[CH+]C(C)C(C)CC	C\C=C/C	C8H17+	C4H8
C8H17+	C4H8	45.3	25.7	C[CH+]C(C)C(C)CC	C\C=C/C	C[CH+]CC	25.7	-25.7	45.3	18.33	-18.33	52.67	C[CH+]C(C)C(C)CC	C\C=C/C	C8H17+	C4H8
C8H17+	C7H14	44.2	26.8	C[CH+]C(C)C(C)CC	C\C=C\C(C)CC	[CH3+]	26.8	-26.8	44.2	12.36	-12.36	58.64	C[CH+]C(C)C(C)CC	C\C=C\C(C)CC	C8H17+	C7H14
C8H17+	C7H14	41.73	29.27	C[CH+]C(C)C(C)CC	C\C=C\C(C)CC	[CH3+]	29.27	-29.27	41.73	14.83	-14.83	56.17	C[CH+]C(C)C(C)CC	C\C=C\C(C)CC	C8H17+	C7H14
C8H17+	C8H16	38.66	32.34	C[CH+]C(C)C(C)CC	C\C=C(/C)C(C)CC	[H+]	32.34	-32.34	38.66	2.57	-2.57	68.43	C[CH+]C(C)C(C)CC	C\C=C(/C)C(C)CC	C8H17+	C8H16
C8H17+	C8H16	32.96	38.04	C[CH+]C(C)C(C)CC	C\C=C(/C)C(C)CC	[H+]	38.04	-38.04	32.96	8.27	-8.27	62.73	C[CH+]C(C)C(C)CC	C\C=C(/C)C(C)CC	C8H17+	C8H16
C8H17+	C8H16	33.81	37.19	C[CH+]C(C)C(C)CC	C=CC(C)C(C)CC	[H+]	37.19	-37.19	33.81	0.27	-0.27	70.73	C[CH+]C(C)C(C)CC	C=CC(C)C(C)CC	C8H17+	C8H16
C8H17+	C8H16	32.54	38.46	C[CH+]C(C)C(C)CC	C=CC(C)C(C)CC	[H+]	38.46	-38.46	32.54	1.54	-1.54	69.46	C[CH+]C(C)C(C)CC	C=CC(C)C(C)CC	C8H17+	C8H16
C8H17+	C8H17+	32.4	38.6	CC(C)(C)CC[CH+]C	CC(C)(C)C[CH+]CC		38.6	-38.6	32.4	40.45	-40.45	30.55	CC(C)(C)CC[CH+]C	CC(C)(C)C[CH+]CC	C8H17+	C8H17+
C8H17+	C8H17+	32.87	38.13	CC(C)(C)CC[CH+]C	CCC[CH+]C(C)(C)C		38.13	-38.13	32.87	38.73	-38.73	32.27	CC(C)(C)CC[CH+]C	CCC[CH+]C(C)(C)C	C8H17+	C8H17+
C8H17+	C8H17+	54.07	16.93	CC(C)(C)CC[CH+]C	[CH2+]C(C)(C)CCCC		16.93	-16.93	54.07	12.48	-12.48	58.52	CC(C)(C)CC[CH+]C	[CH2+]C(C)(C)CCCC	C8H17+	C8H17+
C8H17+	C8H17+	26.99	44.01	CC(C)(C)CC[CH+]C	CC(C)(C)CCC[CH2+]		44.01	-44.01	26.99	36.59	-36.59	34.41	CC(C)(C)CC[CH+]C	CC(C)(C)CCC[CH2+]	C8H17+	C8H17+
C8H17+	C5H11+	45.24	25.76	CC(C)(C)CC[CH+]C	[CH2+]C(C)(C)C	C=CC	25.76	-25.76	45.24	9.67	-9.67	61.33	CC(C)(C)CC[CH+]C	[CH2+]C(C)(C)C	C8H17+	C5H11+
C8H17+	C5H11+	39.93	31.07	CC(C)(C)CC[CH+]C	[CH2+]C(C)(C)C	C=CC	31.07	-31.07	39.93	14.98	-14.98	56.02	CC(C)(C)CC[CH+]C	[CH2+]C(C)(C)C	C8H17+	C5H11+
C8H17+	C4H9+	25.04	45.96	CC(C)(C)CC[CH+]C	C[C+](C)C	CC1CC1	45.96	-45.96	25.04	29.32	-29.32	41.68	CC(C)(C)CC[CH+]C	C[C+](C)C	C8H17+	C4H9+
C8H17+	C8H16	32.21	38.79	CC(C)(C)CC[CH+]C	CC(C)(C)C\C=C\C	[H+]	38.79	-38.79	32.21	4.49	-4.49	66.51	CC(C)(C)CC[CH+]C	CC(C)(C)C\C=C\C	C8H17+	C8H16
C8H17+	C8H16	30.35	40.65	CC(C)(C)CC[CH+]C	CC(C)(C)CCC=C	[H+]	40.65	-40.65	30.35	1.88	-1.88	69.12	CC(C)(C)CC[CH+]C	CC(C)(C)CCC=C	C8H17+	C8H16
C8H17+	C8H17+	35.47	35.53	CC(C)(C)CCC[CH2+]	CC(C)(C)C[CH+]CC		35.53	-35.53	35.47	42.74	-42.74	28.26	CC(C)(C)CCC[CH2+]	CC(C)(C)C[CH+]CC	C8H17+	C8H17+
C8H17+	C8H17+	51.8	19.2	CC(C)(C)CCC[CH2+]	CCC[CH+]C(C)(C)C		19.2	-19.2	51.8	25.12	-25.12	45.88	CC(C)(C)CCC[CH2+]	CCC[CH+]C(C)(C)C	C8H17+	C8H17+
C8H17+	C8H17+	50.46	20.54	CC(C)(C)CCC[CH2+]	CCC[CH+]C(C)(C)C		20.54	-20.54	50.46	26.46	-26.46	44.54	CC(C)(C)CCC[CH2+]	CCC[CH+]C(C)(C)C	C8H17+	C8H17+
C8H17+	C8H17+	33.01	37.99	CC(C)(C)CCC[CH2+]	CC(C)(C)CC[CH+]C		37.99	-37.99	33.01	42.54	-42.54	28.46	CC(C)(C)CCC[CH2+]	CC(C)(C)CC[CH+]C	C8H17+	C8H17+
C8H17+	C8H17+	53.68	17.32	CC(C)(C)CCC[CH2+]	[CH2+]C(C)(C)CCCC		17.32	-17.32	53.68	17.01	-17.01	53.99	CC(C)(C)CCC[CH2+]	[CH2+]C(C)(C)CCCC	C8H17+	C8H17+
C8H17+	C6H13+	47.56	23.44	CC(C)(C)CCC[CH2+]	CC(C)(C)C[CH2+]	C=C	23.44	-23.44	47.56	8.54	-8.54	62.46	CC(C)(C)CCC[CH2+]	CC(C)(C)C[CH2+]	C8H17+	C6H13+
C8H17+	C6H13+	40.99	30.01	CC(C)(C)CCC[CH2+]	CC(C)(C)C[CH2+]	C=C	30.01	-30.01	40.99	15.11	-15.11	55.89	CC(C)(C)CCC[CH2+]	CC(C)(C)C[CH2+]	C8H17+	C6H13+
C8H17+	C8H16	32.2	38.8	CC(C)(C)CCC[CH2+]	CC(C)(C)CCC=C	[H+]	38.8	-38.8	32.2	4.9	-4.9	66.1	CC(C)(C)CCC[CH2+]	CC(C)(C)CCC=C	C8H17+	C8H16
C8H17+	C8H17+	54.47	16.53	CC(C)(C[CH2+])CCC	CC[CH+]C(C)(C)CC		16.53	-16.53	54.47	23.72	-23.72	47.28	CC(C)(C[CH2+])CCC	CC[CH+]C(C)(C)CC	C8H17+	C8H17+
C8H17+	C8H17+	61.8	9.2	CC(C)(C[CH2+])CCC	CC(C)(C[CH+]C)CC		9.2	-9.2	61.8	15.37	-15.37	55.63	CC(C)(C[CH2+])CCC	CC(C)(C[CH+]C)CC	C8H17+	C8H17+
C8H17+	C8H17+	33.55	37.45	CC(C)(C[CH2+])CCC	C[CH+]C(C)(C)CCC		37.45	-37.45	33.55	42.13	-42.13	28.87	CC(C)(C[CH2+])CCC	C[CH+]C(C)(C)CCC	C8H17+	C8H17+
C8H17+	C8H17+	57.2	13.8	CC(C)(C[CH2+])CCC	CC(C)(CC)CC[CH2+]		13.8	-13.8	57.2	15.08	-15.08	55.92	CC(C)(C[CH2+])CCC	CC(C)(CC)CC[CH2+]	C8H17+	C8H17+
C8H17+	C8H17+	50.78	20.22	CC(C)(C[CH2+])CCC	[CH2+]C(C)(CC)CCC		20.22	-20.22	50.78	20.98	-20.98	50.02	CC(C)(C[CH2+])CCC	[CH2+]C(C)(CC)CCC	C8H17+	C8H17+
C8H17+	C7H14	23.76	47.24	CC(C)(C[CH2+])CCC	CC1(C)CCCC1	[CH3+]	47.24	-47.24	23.76	46.39	-46.39	24.61	CC(C)(C[CH2+])CCC	CC1(C)CCCC1	C8H17+	C7H14
C8H17+	C6H13+	51.77	19.23	CC(C)(C[CH2+])CCC	C[C+](C)CCC	C=C	19.23	-19.23	51.77	10.29	-10.29	60.71	CC(C)(C[CH2+])CCC	C[C+](C)CCC	C8H17+	C6H13+
C8H17+	C6H13+	45.47	25.53	CC(C)(C[CH2+])CCC	C[C+](C)CCC	C=C	25.53	-25.53	45.47	16.59	-16.59	54.41	CC(C)(C[CH2+])CCC	C[C+](C)CCC	C8H17+	C6H13+
C8H17+	C8H16	36.5	34.5	CC(C)(C[CH2+])CCC	C=CC(C)(C)CCC	[H+]	34.5	-34.5	36.5	4.52	-4.52	66.48	CC(C)(C[CH2+])CCC	C=CC(C)(C)CCC	C8H17+	C8H16
C8H17+	C8H16	30.05	40.95	CC(C)(C[CH2+])CCC	C=CC(C)(C)CCC	[H+]	40.95	-40.95	30.05	10.97	-10.97	60.03	CC(C)(C[CH2+])CCC	C=CC(C)(C)CCC	C8H17+	C8H16
C8H17+	C8H17+	34.2	36.8	CC(C)[CH+]CC(C)C	C[C+](C)CCC(C)C		36.8	-36.8	34.2	39.63	-39.63	31.37	CC(C)[CH+]CC(C)C	C[C+](C)CCC(C)C	C8H17+	C8H17+
C8H17+	C8H17+	31.75	39.25	CC(C)[CH+]CC(C)C	C[C+](C)CCC(C)C		39.25	-39.25	31.75	42.08	-42.08	28.92	CC(C)[CH+]CC(C)C	C[C+](C)CCC(C)C	C8H17+	C8H17+
C8H17+	C8H17+	46.43	24.57	CC(C)[CH+]CC(C)C	[CH2+]C(C)CCC(C)C		24.57	-24.57	46.43	20.27	-20.27	50.73	CC(C)[CH+]CC(C)C	[CH2+]C(C)CCC(C)C	C8H17+	C8H17+
C8H17+	C8H17+	30.5	40.5	CC(C)[CH+]CC(C)C	[CH2+]C(C)CCC(C)C		40.5	-40.5	30.5	36.2	-36.2	34.8	CC(C)[CH+]CC(C)C	[CH2+]C(C)CCC(C)C	C8H17+	C8H17+
C8H17+	C5H10	47.2	23.8	CC(C)[CH+]CC(C)C	C=CC(C)C	C[CH+]C	23.8	-23.8	47.2	9.22	-9.22	61.78	CC(C)[CH+]CC(C)C	C=CC(C)C	C8H17+	C5H10
C8H17+	C5H10	41.62	29.38	CC(C)[CH+]CC(C)C	C=CC(C)C	C[CH+]C	29.38	-29.38	41.62	14.8	-14.8	56.2	CC(C)[CH+]CC(C)C	C=CC(C)C	C8H17+	C5H10
C8H17+	C7H14	42.15	28.85	CC(C)[CH+]CC(C)C	CC(C)C\C=C\C	[CH3+]	28.85	-28.85	42.15	10.87	-10.87	60.13	CC(C)[CH+]CC(C)C	CC(C)C\C=C\C	C8H17+	C7H14
C8H17+	C7H14	37.37	33.63	CC(C)[CH+]CC(C)C	CC(C)C\C=C\C	[CH3+]	33.63	-33.63	37.37	15.65	-15.65	55.35	CC(C)[CH+]CC(C)C	CC(C)C\C=C\C	C8H17+	C7H14
C8H17+	C8H16	31.11	39.89	CC(C)[CH+]CC(C)C	C/C(C)=C\CC(C)C	[H+]	39.89	-39.89	31.11	6.96	-6.96	64.04	CC(C)[CH+]CC(C)C	C/C(C)=C\CC(C)C	C8H17+	C8H16
C8H17+	C8H16	31.32	39.68	CC(C)[CH+]CC(C)C	CC(C)/C=C/C(C)C	[H+]	39.68	-39.68	31.32	4.9	-4.9	66.1	CC(C)[CH+]CC(C)C	CC(C)/C=C/C(C)C	C8H17+	C8H16
C8H17+	C8H17+	39.53	31.47	CC(C)C([CH2+])(C)CC	C[C+](C)C(C)(C)CC		31.47	-31.47	39.53	41.25	-41.25	29.75	CC(C)C([CH2+])(C)CC	C[C+](C)C(C)(C)CC	C8H17+	C8H17+
C8H17+	C8H17+	34.79	36.21	CC(C)C([CH2+])(C)CC	CC(C)C(C)(C)[CH+]C		36.21	-36.21	34.79	42.31	-42.31	28.69	CC(C)C([CH2+])(C)CC	CC(C)C(C)(C)[CH+]C	C8H17+	C8H17+
C8H17+	C8H17+	50.73	20.27	CC(C)C([CH2+])(C)CC	CC(C)C(C)(C)C[CH2+]		20.27	-20.27	50.73	22.67	-22.67	48.33	CC(C)C([CH2+])(C)CC	CC(C)C(C)(C)C[CH2+]	C8H17+	C8H17+
C8H17+	C8H17+	50.16	20.84	CC(C)C([CH2+])(C)CC	[CH2+]C(C)C(C)(C)CC		20.84	-20.84	50.16	21.15	-21.15	49.85	CC(C)C([CH2+])(C)CC	[CH2+]C(C)C(C)(C)CC	C8H17+	C8H17+
C8H17+	C3H7+	49.62	21.38	CC(C)C([CH2+])(C)CC	C[CH+]C	C=C(C)CC	21.38	-21.38	49.62	20.09	-20.09	50.91	CC(C)C([CH2+])(C)CC	C[CH+]C	C8H17+	C3H7+
C8H17+	C3H7+	43.86	27.14	CC(C)C([CH2+])(C)CC	C[CH+]C	C=C(C)CC	27.14	-27.14	43.86	25.85	-25.85	45.15	CC(C)C([CH2+])(C)CC	C[CH+]C	C8H17+	C3H7+
C8H17+	C6H12	47.97	23.03	CC(C)C([CH2+])(C)CC	C=C(C)C(C)C	[CH2+]C	23.03	-23.03	47.97	17.02	-17.02	53.98	CC(C)C([CH2+])(C)CC	C=C(C)C(C)C	C8H17+	C6H12
C8H17+	C6H12	40.65	30.35	CC(C)C([CH2+])(C)CC	C=C(C)C(C)C	[CH2+]C	30.35	-30.35	40.65	24.34	-24.34	46.66	CC(C)C([CH2+])(C)CC	C=C(C)C(C)C	C8H17+	C6H12
C8H17+	C7H14	42.68	28.32	CC(C)C([CH2+])(C)CC	C=C(CC)C(C)C	[CH3+]	28.32	-28.32	42.68	17.82	-17.82	53.18	CC(C)C([CH2+])(C)CC	C=C(CC)C(C)C	C8H17+	C7H14
C8H17+	C7H14	37.44	33.56	CC(C)C([CH2+])(C)CC	C=C(CC)C(C)C	[CH3+]	33.56	-33.56	37.44	23.06	-23.06	47.94	CC(C)C([CH2+])(C)CC	C=C(CC)C(C)C	C8H17+	C7H14
C8H17+	C7H14	24.29	46.71	CC(C)C([CH2+])(C)CC	CC(C)C1(C)CC1	[CH3+]	46.71	-46.71	24.29	28.09	-28.09	42.91	CC(C)C([CH2+])(C)CC	CC(C)C1(C)CC1	C8H17+	C7H14
C8H17+	C8H17+	35.35	35.65	CC(C)C(C)(C)[CH+]C	C[C+](C)C(C)(C)CC		35.65	-35.65	35.35	39.17	-39.17	31.83	CC(C)C(C)(C)[CH+]C	C[C+](C)C(C)(C)CC	C8H17+	C8H17+
C8H17+	C8H17+	28.65	42.35	CC(C)C(C)(C)[CH+]C	CC(C)C(C)(C)C[CH2+]		42.35	-42.35	28.65	37.89	-37.89	33.11	CC(C)C(C)(C)[CH+]C	CC(C)C(C)(C)C[CH2+]	C8H17+	C8H17+
C8H17+	C5H10	50.61	20.39	CC(C)C(C)(C)[CH+]C	C\C=C(/C)C	C[CH+]C	20.39	-20.39	50.61	15.34	-15.34	55.66	CC(C)C(C)(C)[CH+]C	C\C=C(/C)C	C8H17+	C5H10
C8H17+	C5H10	44.48	26.52	CC(C)C(C)(C)[CH+]C	C\C=C(/C)C	C[CH+]C	26.52	-26.52	44.48	21.47	-21.47	49.53	CC(C)C(C)(C)[CH+]C	C\C=C(/C)C	C8H17+	C5H10
C8H17+	C8H17+	49.23	21.77	CC(C)C(C)(C)[CH+]C	[CH2+]C(C)C(C)(C)CC		21.77	-21.77	49.23	16.08	-16.08	54.92	CC(C)C(C)(C)[CH+]C	[CH2+]C(C)C(C)(C)CC	C8H17+	C8H17+
C8H17+	C8H17+	47.08	23.92	CC(C)C(C)(C)[CH+]C	[CH2+]C(C)C(C)(C)CC		23.92	-23.92	47.08	18.23	-18.23	52.77	CC(C)C(C)(C)[CH+]C	[CH2+]C(C)C(C)(C)CC	C8H17+	C8H17+
C8H17+	C8H17+	31.04	39.96	CC(C)C(C)(C)[CH+]C	CC(C)C([CH2+])(C)CC		39.96	-39.96	31.04	33.71	-33.71	37.29	CC(C)C(C)(C)[CH+]C	CC(C)C([CH2+])(C)CC	C8H17+	C8H17+
C8H17+	C7H14	44.64	26.36	CC(C)C(C)(C)[CH+]C	C\C=C(/C)C(C)C	[CH3+]	26.36	-26.36	44.64	12.23	-12.23	58.77	CC(C)C(C)(C)[CH+]C	C\C=C(/C)C(C)C	C8H17+	C7H14
C8H17+	C7H14	36.96	34.04	CC(C)C(C)(C)[CH+]C	C\C=C(/C)C(C)C	[CH3+]	34.04	-34.04	36.96	19.91	-19.91	51.09	CC(C)C(C)(C)[CH+]C	C\C=C(/C)C(C)C	C8H17+	C7H14
C8H17+	C8H16	31.86	39.14	CC(C)C(C)(C)[CH+]C	CC(C)C(C)(C)C=C	[H+]	39.14	-39.14	31.86	1.81	-1.81	69.19	CC(C)C(C)(C)[CH+]C	CC(C)C(C)(C)C=C	C8H17+	C8H16
C8H17+	C8H17+	54.68	16.32	CC(C)C(C)(C)C[CH2+]	C[C+](C)C(C)(C)CC		16.32	-16.32	54.68	24.68	-24.68	46.32	CC(C)C(C)(C)C[CH2+]	C[C+](C)C(C)(C)CC	C8H17+	C8H17+
C8H17+	C8H17+	33.4	37.6	CC(C)C(C)(C)C[CH2+]	CC(C)C(C)(C)[CH+]C		37.6	-37.6	33.4	42.08	-42.08	28.92	CC(C)C(C)(C)C[CH2+]	CC(C)C(C)(C)[CH+]C	C8H17+	C8H17+
C8H17+	C8H17+	57.84	13.16	CC(C)C(C)(C)C[CH2+]	[CH2+]C(C)C(C)(C)CC		13.16	-13.16	57.84	12.06	-12.06	58.94	CC(C)C(C)(C)C[CH2+]	[CH2+]C(C)C(C)(C)CC	C8H17+	C8H17+
C8H17+	C8H17+	51.88	19.12	CC(C)C(C)(C)C[CH2+]	[CH2+]C(C)C(C)(C)CC		19.12	-19.12	51.88	18.02	-18.02	52.98	CC(C)C(C)(C)C[CH2+]	[CH2+]C(C)C(C)(C)CC	C8H17+	C8H17+
C8H17+	C8H17+	48.35	22.65	CC(C)C(C)(C)C[CH2+]	CC(C)C([CH2+])(C)CC		22.65	-22.65	48.35	21.26	-21.26	49.74	CC(C)C(C)(C)C[CH2+]	CC(C)C([CH2+])(C)CC	C8H17+	C8H17+
C8H17+	C6H13+	51.32	19.68	CC(C)C(C)(C)C[CH2+]	C[C+](C)C(C)C	C=C	19.68	-19.68	51.32	12.52	-12.52	58.48	CC(C)C(C)(C)C[CH2+]	C[C+](C)C(C)C	C8H17+	C6H13+
C8H17+	C6H13+	45.24	25.76	CC(C)C(C)(C)C[CH2+]	C[C+](C)C(C)C	C=C	25.76	-25.76	45.24	18.6	-18.6	52.4	CC(C)C(C)(C)C[CH2+]	C[C+](C)C(C)C	C8H17+	C6H13+
C8H17+	C8H16	33.64	37.36	CC(C)C(C)(C)C[CH2+]	CC(C)C(C)(C)C=C	[H+]	37.36	-37.36	33.64	1.28	-1.28	69.72	CC(C)C(C)(C)C[CH2+]	CC(C)C(C)(C)C=C	C8H17+	C8H16
C8H17+	C8H16	32.16	38.84	CC(C)C(C)(C)C[CH2+]	CC(C)C(C)(C)C=C	[H+]	38.84	-38.84	32.16	2.76	-2.76	68.24	CC(C)C(C)(C)C[CH2+]	CC(C)C(C)(C)C=C	C8H17+	C8H16
C8H17+	C8H16	28.65	42.35	CC(C)C(C)(C)C[CH2+]	CC(C)C(C)(C)C=C	[H+]	42.35	-42.35	28.65	6.26	-6.26	64.74	CC(C)C(C)(C)C[CH2+]	CC(C)C(C)(C)C=C	C8H17+	C8H16
C8H17+	C8H17+	52.88	18.12	CC(C)C(C)C[CH+]C	C[C+](C)C(C)CCC		18.12	-18.12	52.88	23.43	-23.43	47.57	CC(C)C(C)C[CH+]C	C[C+](C)C(C)CCC	C8H17+	C8H17+
C8H17+	C8H17+	34.28	36.72	CC(C)C(C)C[CH+]C	C[C+](CCC)C(C)C		36.72	-36.72	34.28	38.9	-38.9	32.1	CC(C)C(C)C[CH+]C	C[C+](CCC)C(C)C	C8H17+	C8H17+
C8H17+	C8H17+	32.43	38.57	CC(C)C(C)C[CH+]C	CC[CH+]C(C)C(C)C		38.57	-38.57	32.43	40.37	-40.37	30.63	CC(C)C(C)C[CH+]C	CC[CH+]C(C)C(C)C	C8H17+	C8H17+
C8H17+	C8H17+	48.31	22.69	CC(C)C(C)C[CH+]C	[CH2+]C(CCC)C(C)C		22.69	-22.69	48.31	19.38	-19.38	51.62	CC(C)C(C)C[CH+]C	[CH2+]C(CCC)C(C)C	C8H17+	C8H17+
C8H17+	C8H17+	54.5	16.5	CC(C)C(C)C[CH+]C	[CH2+]C(C)C(C)CCC		16.5	-16.5	54.5	12.84	-12.84	58.16	CC(C)C(C)C[CH+]C	[CH2+]C(C)C(C)CCC	C8H17+	C8H17+
C8H17+	C8H17+	26.58	44.42	CC(C)C(C)C[CH+]C	CC(C)C(C)CC[CH2+]		44.42	-44.42	26.58	39.61	-39.61	31.39	CC(C)C(C)C[CH+]C	CC(C)C(C)CC[CH2+]	C8H17+	C8H17+
C8H17+	C5H11+	48.77	22.23	CC(C)C(C)C[CH+]C	C[CH+]C(C)C	C=CC	22.23	-22.23	48.77	10.51	-10.51	60.49	CC(C)C(C)C[CH+]C	C[CH+]C(C)C	C8H17+	C5H11+
C8H17+	C5H11+	42.34	28.66	CC(C)C(C)C[CH+]C	C[CH+]C(C)C	C=CC	28.66	-28.66	42.34	16.94	-16.94	54.06	CC(C)C(C)C[CH+]C	C[CH+]C(C)C	C8H17+	C5H11+
C8H17+	C8H16	30.07	40.93	CC(C)C(C)C[CH+]C	CC(C)C(C)\C=C\C	[H+]	40.93	-40.93	30.07	7.02	-7.02	63.98	CC(C)C(C)C[CH+]C	CC(C)C(C)\C=C\C	C8H17+	C8H16
C8H17+	C8H16	30.05	40.95	CC(C)C(C)C[CH+]C	CC(C)C(C)CC=C	[H+]	40.95	-40.95	30.05	1.8	-1.8	69.2	CC(C)C(C)C[CH+]C	CC(C)C(C)CC=C	C8H17+	C8H16
C8H17+	C8H17+	55.38	15.62	CC(C)C(C)CC[CH2+]	C[C+](CCC)C(C)C		15.62	-15.62	55.38	26.5	-26.5	44.5	CC(C)C(C)CC[CH2+]	C[C+](CCC)C(C)C	C8H17+	C8H17+
C8H17+	C8H17+	53.6	17.4	CC(C)C(C)CC[CH2+]	C[C+](CCC)C(C)C		17.4	-17.4	53.6	28.28	-28.28	42.72	CC(C)C(C)CC[CH2+]	C[C+](CCC)C(C)C	C8H17+	C8H17+
C8H17+	C8H17+	63.35	7.65	CC(C)C(C)CC[CH2+]	C[C+](C)C(C)CCC		7.65	-7.65	63.35	17.68	-17.68	53.32	CC(C)C(C)CC[CH2+]	C[C+](C)C(C)CCC	C8H17+	C8H17+
C8H17+	C8H17+	37.69	33.31	CC(C)C(C)CC[CH2+]	CC[CH+]C(C)C(C)C		33.31	-33.31	37.69	42.07	-42.07	28.93	CC(C)C(C)CC[CH2+]	CC[CH+]C(C)C(C)C	C8H17+	C8H17+
C8H17+	C8H17+	33.78	37.22	CC(C)C(C)CC[CH2+]	CC(C)C(C)C[CH+]C		37.22	-37.22	33.78	43.25	-43.25	27.75	CC(C)C(C)CC[CH2+]	CC(C)C(C)C[CH+]C	C8H17+	C8H17+
C8H17+	C8H17+	59.26	11.74	CC(C)C(C)CC[CH2+]	[CH2+]C(CCC)C(C)C		11.74	-11.74	59.26	13.86	-13.86	57.14	CC(C)C(C)CC[CH2+]	[CH2+]C(CCC)C(C)C	C8H17+	C8H17+
C8H17+	C8H17+	58.89	12.11	CC(C)C(C)CC[CH2+]	[CH2+]C(C)C(C)CCC		12.11	-12.11	58.89	11.67	-11.67	59.33	CC(C)C(C)CC[CH2+]	[CH2+]C(C)C(C)CCC	C8H17+	C8H17+
C8H17+	C6H13+	47.65	23.35	CC(C)C(C)CC[CH2+]	[CH2+]C(C)C(C)C	C=C	23.35	-23.35	47.65	9.86	-9.86	61.14	CC(C)C(C)CC[CH2+]	[CH2+]C(C)C(C)C	C8H17+	C6H13+
C8H17+	C6H13+	42.46	28.54	CC(C)C(C)CC[CH2+]	[CH2+]C(C)C(C)C	C=C	28.54	-28.54	42.46	15.05	-15.05	55.95	CC(C)C(C)CC[CH2+]	[CH2+]C(C)C(C)C	C8H17+	C6H13+
C8H17+	C5H11+	26.05	44.95	CC(C)C(C)CC[CH2+]	C[CH+]C(C)C	C1CC1	44.95	-44.95	26.05	29.24	-29.24	41.76	CC(C)C(C)CC[CH2+]	C[CH+]C(C)C	C8H17+	C5H11+
C8H17+	C8H16	36.49	34.51	CC(C)C(C)CC[CH2+]	CC(C)C(C)CC=C	[H+]	34.51	-34.51	36.49	2.04	-2.04	68.96	CC(C)C(C)CC[CH2+]	CC(C)C(C)CC=C	C8H17+	C8H16
C8H17+	C8H16	32.53	38.47	CC(C)C(C)CC[CH2+]	CC(C)C(C)CC=C	[H+]	38.47	-38.47	32.53	6	-6	65	CC(C)C(C)CC[CH2+]	CC(C)C(C)CC=C	C8H17+	C8H16
C8H17+	C8H17+	54.78	16.22	CC(C)CC([CH2+])(C)C	C[C+](C)CC(C)(C)C		16.22	-16.22	54.78	26.39	-26.39	44.61	CC(C)CC([CH2+])(C)C	C[C+](C)CC(C)(C)C	C8H17+	C8H17+
C8H17+	C8H17+	37.3	33.7	CC(C)CC([CH2+])(C)C	CC(C)[CH+]C(C)(C)C		33.7	-33.7	37.3	39.59	-39.59	31.41	CC(C)CC([CH2+])(C)C	CC(C)[CH+]C(C)(C)C	C8H17+	C8H17+
C8H17+	C8H17+	54.59	16.41	CC(C)CC([CH2+])(C)C	[CH2+]C(C)CC(C)(C)C		16.41	-16.41	54.59	14.69	-14.69	56.31	CC(C)CC([CH2+])(C)C	[CH2+]C(C)CC(C)(C)C	C8H17+	C8H17+
C8H17+	C4H9+	48.65	22.35	CC(C)CC([CH2+])(C)C	[CH2+]C(C)C	C=C(C)C	22.35	-22.35	48.65	15.08	-15.08	55.92	CC(C)CC([CH2+])(C)C	[CH2+]C(C)C	C8H17+	C4H9+
C8H17+	C4H9+	43.31	27.69	CC(C)CC([CH2+])(C)C	[CH2+]C(C)C	C=C(C)C	27.69	-27.69	43.31	20.42	-20.42	50.58	CC(C)CC([CH2+])(C)C	[CH2+]C(C)C	C8H17+	C4H9+
C8H17+	C7H14	45.42	25.58	CC(C)CC([CH2+])(C)C	C=C(C)CC(C)C	[CH3+]	25.58	-25.58	45.42	13.18	-13.18	57.82	CC(C)CC([CH2+])(C)C	C=C(C)CC(C)C	C8H17+	C7H14
C8H17+	C7H14	41.03	29.97	CC(C)CC([CH2+])(C)C	C=C(C)CC(C)C	[CH3+]	29.97	-29.97	41.03	17.57	-17.57	53.43	CC(C)CC([CH2+])(C)C	C=C(C)CC(C)C	C8H17+	C7H14
C8H17+	C5H10	28.96	42.04	CC(C)CC([CH2+])(C)C	CC1(C)CC1	C[CH+]C	42.04	-42.04	28.96	29.4	-29.4	41.6	CC(C)CC([CH2+])(C)C	CC1(C)CC1	C8H17+	C5H10
C8H17+	C8H17+	35.75	35.25	CC(C)CC(C)C[CH2+]	C[C+](CC)CC(C)C		35.25	-35.25	35.75	41.63	-41.63	29.37	CC(C)CC(C)C[CH2+]	C[C+](CC)CC(C)C	C8H17+	C8H17+
C8H17+	C8H17+	59.54	11.46	CC(C)CC(C)C[CH2+]	C[C+](C)CC(C)CC		11.46	-11.46	59.54	16.98	-16.98	54.02	CC(C)CC(C)C[CH2+]	C[C+](C)CC(C)CC	C8H17+	C8H17+
C8H17+	C8H17+	48	23	CC(C)CC(C)C[CH2+]	C[CH+]C(C)CC(C)C		23	-23	48	26.46	-26.46	44.54	CC(C)CC(C)C[CH2+]	C[CH+]C(C)CC(C)C	C8H17+	C8H17+
C8H17+	C8H17+	47.15	23.85	CC(C)CC(C)C[CH2+]	CC(C)[CH+]C(C)CC		23.85	-23.85	47.15	26.3	-26.3	44.7	CC(C)CC(C)C[CH2+]	CC(C)[CH+]C(C)CC	C8H17+	C8H17+
C8H17+	C8H17+	32.59	38.41	CC(C)CC(C)C[CH2+]	[CH2+]C(CC)CC(C)C		38.41	-38.41	32.59	38.46	-38.46	32.54	CC(C)CC(C)C[CH2+]	[CH2+]C(CC)CC(C)C	C8H17+	C8H17+
C8H17+	C8H17+	55.83	15.17	CC(C)CC(C)C[CH2+]	[CH2+]C(C)CC(C)CC		15.17	-15.17	55.83	10.98	-10.98	60.02	CC(C)CC(C)C[CH2+]	[CH2+]C(C)CC(C)CC	C8H17+	C8H17+
C8H17+	C6H13+	47.68	23.32	CC(C)CC(C)C[CH2+]	CC(C)C[CH+]C	C=C	23.32	-23.32	47.68	9.06	-9.06	61.94	CC(C)CC(C)C[CH2+]	CC(C)C[CH+]C	C8H17+	C6H13+
C8H17+	C6H13+	41.9	29.1	CC(C)CC(C)C[CH2+]	CC(C)C[CH+]C	C=C	29.1	-29.1	41.9	14.84	-14.84	56.16	CC(C)CC(C)C[CH2+]	CC(C)C[CH+]C	C8H17+	C6H13+
C8H17+	C8H16	30.82	40.18	CC(C)CC(C)C[CH2+]	C=CC(C)CC(C)C	[H+]	40.18	-40.18	30.82	6.02	-6.02	64.98	CC(C)CC(C)C[CH2+]	C=CC(C)CC(C)C	C8H17+	C8H16
C8H17+	C8H17+	50.76	20.24	CC(C)CC[CH+]CC	C[C+](C)CCCCC		20.24	-20.24	50.76	24.1	-24.1	46.9	CC(C)CC[CH+]CC	C[C+](C)CCCCC	C8H17+	C8H17+
C8H17+	C8H17+	32.38	38.62	CC(C)CC[CH+]CC	CC(C)C[CH+]CCC		38.62	-38.62	32.38	39.8	-39.8	31.2	CC(C)CC[CH+]CC	CC(C)C[CH+]CCC	C8H17+	C8H17+
C8H17+	C8H17+	33.17	37.83	CC(C)CC[CH+]CC	CCCC[CH+]C(C)C		37.83	-37.83	33.17	38.75	-38.75	32.25	CC(C)CC[CH+]CC	CCCC[CH+]C(C)C	C8H17+	C8H17+
C8H17+	C8H17+	29.74	41.26	CC(C)CC[CH+]CC	CC(C)CCC[CH+]C		41.26	-41.26	29.74	40.9	-40.9	30.1	CC(C)CC[CH+]CC	CC(C)CCC[CH+]C	C8H17+	C8H17+
C8H17+	C8H17+	29.6	41.4	CC(C)CC[CH+]CC	CC(C)CCCC[CH2+]		41.4	-41.4	29.6	37.39	-37.39	33.61	CC(C)CC[CH+]CC	CC(C)CCCC[CH2+]	C8H17+	C8H17+
C8H17+	C8H17+	52.56	18.44	CC(C)CC[CH+]CC	[CH2+]C(C)CCCCC		18.44	-18.44	52.56	13.36	-13.36	57.64	CC(C)CC[CH+]CC	[CH2+]C(C)CCCCC	C8H17+	C8H17+
C8H17+	C4H9+	44.6	26.4	CC(C)CC[CH+]CC	[CH2+]C(C)C	C=CCC	26.4	-26.4	44.6	9.16	-9.16	61.84	CC(C)CC[CH+]CC	[CH2+]C(C)C	C8H17+	C4H9+
C8H17+	C4H9+	40.01	30.99	CC(C)CC[CH+]CC	[CH2+]C(C)C	C=CCC	30.99	-30.99	40.01	30.99	-30.99	40.01	CC(C)CC[CH+]CC	[CH2+]C(C)C	C8H17+	C4H9+
C8H17+	C7H14	42.55	28.45	CC(C)CC[CH+]CC	CC(C)CCC=C	[CH3+]	28.45	-28.45	42.55	7.58	-7.58	63.42	CC(C)CC[CH+]CC	CC(C)CCC=C	C8H17+	C7H14
C8H17+	C7H14	38.08	32.92	CC(C)CC[CH+]CC	CC(C)CCC=C	[CH3+]	32.92	-32.92	38.08	32.92	-32.92	38.08	CC(C)CC[CH+]CC	CC(C)CCC=C	C8H17+	C7H14
C8H17+	C8H16	35.95	35.05	CC(C)CC[CH+]CC	CC(C)C\C=C\CC	[H+]	35.05	-35.05	35.95	1.43	-1.43	69.57	CC(C)CC[CH+]CC	CC(C)C\C=C\CC	C8H17+	C8H16
C8H17+	C8H16	31.6	39.4	CC(C)CC[CH+]CC	CC(C)C\C=C\CC	[H+]	39.4	-39.4	31.6	39.4	-39.4	31.6	CC(C)CC[CH+]CC	CC(C)C\C=C\CC	C8H17+	C8H16
C8H17+	C8H16	30.79	40.21	CC(C)CC[CH+]CC	CC(C)CC\C=C\C	[H+]	40.21	-40.21	30.79	4.54	-4.54	66.46	CC(C)CC[CH+]CC	CC(C)CC\C=C\C	C8H17+	C8H16
C8H17+	C8H17+	38.17	32.83	CC(C[CH2+])C(C)(C)C	C[C+](CC)C(C)(C)C		32.83	-32.83	38.17	41.35	-41.35	29.65	CC(C[CH2+])C(C)(C)C	C[C+](CC)C(C)(C)C	C8H17+	C8H17+
C8H17+	C8H17+	33.8	37.2	CC(C[CH2+])C(C)(C)C	C[CH+]C(C)C(C)(C)C		37.2	-37.2	33.8	43.71	-43.71	27.29	CC(C[CH2+])C(C)(C)C	C[CH+]C(C)C(C)(C)C	C8H17+	C8H17+
C8H17+	C8H17+	51	20	CC(C[CH2+])C(C)(C)C	[CH2+]C(CC)C(C)(C)C		20	-20	51	22.46	-22.46	48.54	CC(C[CH2+])C(C)(C)C	[CH2+]C(CC)C(C)(C)C	C8H17+	C8H17+
C8H17+	C8H17+	57.78	13.22	CC(C[CH2+])C(C)(C)C	CC(CC)C([CH2+])(C)C		13.22	-13.22	57.78	12.62	-12.62	58.38	CC(C[CH2+])C(C)(C)C	CC(CC)C([CH2+])(C)C	C8H17+	C8H17+
C8H17+	C4H8	25.41	45.59	CC(C[CH2+])C(C)(C)C	CC1CC1	C[C+](C)C	45.59	-45.59	25.41	36.28	-36.28	34.72	CC(C[CH2+])C(C)(C)C	CC1CC1	C8H17+	C4H8
C8H17+	C6H13+	49.69	21.31	CC(C[CH2+])C(C)(C)C	C[CH+]C(C)(C)C	C=C	21.31	-21.31	49.69	11.15	-11.15	59.85	CC(C[CH2+])C(C)(C)C	C[CH+]C(C)(C)C	C8H17+	C6H13+
C8H17+	C6H13+	44.45	26.55	CC(C[CH2+])C(C)(C)C	C[CH+]C(C)(C)C	C=C	26.55	-26.55	44.45	16.39	-16.39	54.61	CC(C[CH2+])C(C)(C)C	C[CH+]C(C)(C)C	C8H17+	C6H13+
C8H17+	C8H16	36.13	34.87	CC(C[CH2+])C(C)(C)C	C=CC(C)C(C)(C)C	[H+]	34.87	-34.87	36.13	3.51	-3.51	67.49	CC(C[CH2+])C(C)(C)C	C=CC(C)C(C)(C)C	C8H17+	C8H16
C8H17+	C8H16	32.89	38.11	CC(C[CH2+])C(C)(C)C	C=CC(C)C(C)(C)C	[H+]	38.11	-38.11	32.89	6.75	-6.75	64.25	CC(C[CH2+])C(C)(C)C	C=CC(C)C(C)(C)C	C8H17+	C8H16
C8H17+	C8H16	29.51	41.49	CC(C[CH2+])C(C)(C)C	C=CC(C)C(C)(C)C	[H+]	41.49	-41.49	29.51	10.13	-10.13	60.87	CC(C[CH2+])C(C)(C)C	C=CC(C)C(C)(C)C	C8H17+	C8H16
C8H17+	C8H17+	56.27	14.73	CC(C[CH2+])C(C)CC	C[C+](CC)C(C)CC		14.73	-14.73	56.27	23.56	-23.56	47.44	CC(C[CH2+])C(C)CC	C[C+](CC)C(C)CC	C8H17+	C8H17+
C8H17+	C8H17+	54.3	16.7	CC(C[CH2+])C(C)CC	C[C+](CC)C(C)CC		16.7	-16.7	54.3	25.53	-25.53	45.47	CC(C[CH2+])C(C)CC	C[C+](CC)C(C)CC	C8H17+	C8H17+
C8H17+	C8H17+	38.03	32.97	CC(C[CH2+])C(C)CC	C[C+](CC)C(C)CC		32.97	-32.97	38.03	41.8	-41.8	29.2	CC(C[CH2+])C(C)CC	C[C+](CC)C(C)CC	C8H17+	C8H17+
C8H17+	C8H17+	34.06	36.94	CC(C[CH2+])C(C)CC	C[CH+]C(C)C(C)CC		36.94	-36.94	34.06	43.06	-43.06	27.94	CC(C[CH2+])C(C)CC	C[CH+]C(C)C(C)CC	C8H17+	C8H17+
C8H17+	C8H17+	60.49	10.51	CC(C[CH2+])C(C)CC	C[CH+]C(C)C(C)CC		10.51	-10.51	60.49	16.63	-16.63	54.37	CC(C[CH2+])C(C)CC	C[CH+]C(C)C(C)CC	C8H17+	C8H17+
C8H17+	C8H17+	51.93	19.07	CC(C[CH2+])C(C)CC	[CH2+]C(CC)C(C)CC		19.07	-19.07	51.93	21.24	-21.24	49.76	CC(C[CH2+])C(C)CC	[CH2+]C(CC)C(C)CC	C8H17+	C8H17+
C8H17+	C8H17+	58.32	12.68	CC(C[CH2+])C(C)CC	[CH2+]C(CC)C(C)CC		12.68	-12.68	58.32	14.85	-14.85	56.15	CC(C[CH2+])C(C)CC	[CH2+]C(CC)C(C)CC	C8H17+	C8H17+
C8H17+	C7H14	22.19	48.81	CC(C[CH2+])C(C)CC	CC1CCCC1C	[CH3+]	48.81	-48.81	22.19	49.78	-49.78	21.22	CC(C[CH2+])C(C)CC	CC1CCCC1C	C8H17+	C7H14
C8H17+	C6H13+	50.76	20.24	CC(C[CH2+])C(C)CC	C[CH+]C(C)CC	C=C	20.24	-20.24	50.76	9.76	-9.76	61.24	CC(C[CH2+])C(C)CC	C[CH+]C(C)CC	C8H17+	C6H13+
C8H17+	C6H13+	45.42	25.58	CC(C[CH2+])C(C)CC	C[CH+]C(C)CC	C=C	25.58	-25.58	45.42	15.1	-15.1	55.9	CC(C[CH2+])C(C)CC	C[CH+]C(C)CC	C8H17+	C6H13+
C8H17+	C8H16	36.36	34.64	CC(C[CH2+])C(C)CC	C=CC(C)C(C)CC	[H+]	34.64	-34.64	36.36	1.9	-1.9	69.1	CC(C[CH2+])C(C)CC	C=CC(C)C(C)CC	C8H17+	C8H16
C8H17+	C8H16	29.44	41.56	CC(C[CH2+])C(C)CC	C=CC(C)C(C)CC	[H+]	41.56	-41.56	29.44	8.82	-8.82	62.18	CC(C[CH2+])C(C)CC	C=CC(C)C(C)CC	C8H17+	C8H16
C8H17+	C8H17+	39.28	31.72	CC(CC)C([CH2+])(C)C	C[C+](CC)C(C)(C)C		31.72	-31.72	39.28	41.5	-41.5	29.5	CC(CC)C([CH2+])(C)C	C[C+](CC)C(C)(C)C	C8H17+	C8H17+
C8H17+	C8H17+	53.81	17.19	CC(CC)C([CH2+])(C)C	C[CH+]C(C)C(C)(C)C		17.19	-17.19	53.81	25.13	-25.13	45.87	CC(CC)C([CH2+])(C)C	C[CH+]C(C)C(C)(C)C	C8H17+	C8H17+
C8H17+	C8H17+	59.48	11.52	CC(CC)C([CH2+])(C)C	CC(C[CH2+])C(C)(C)C		11.52	-11.52	59.48	13.45	-13.45	57.55	CC(CC)C([CH2+])(C)C	CC(C[CH2+])C(C)(C)C	C8H17+	C8H17+
C8H17+	C8H17+	50.56	20.44	CC(CC)C([CH2+])(C)C	[CH2+]C(CC)C(C)(C)C		20.44	-20.44	50.56	20.64	-20.64	50.36	CC(CC)C([CH2+])(C)C	[CH2+]C(CC)C(C)(C)C	C8H17+	C8H17+
C8H17+	C4H9+	51.07	19.93	CC(CC)C([CH2+])(C)C	C[CH+]CC	C=C(C)C	19.93	-19.93	51.07	18.63	-18.63	52.37	CC(CC)C([CH2+])(C)C	C[CH+]CC	C8H17+	C4H9+
C8H17+	C4H9+	44.37	26.63	CC(CC)C([CH2+])(C)C	C[CH+]CC	C=C(C)C	26.63	-26.63	44.37	25.33	-25.33	45.67	CC(CC)C([CH2+])(C)C	C[CH+]CC	C8H17+	C4H9+
C8H17+	C7H14	42.93	28.07	CC(CC)C([CH2+])(C)C	C=C(C)C(C)CC	[CH3+]	28.07	-28.07	42.93	15.8	-15.8	55.2	CC(CC)C([CH2+])(C)C	C=C(C)C(C)CC	C8H17+	C7H14
C8H17+	C7H14	38.15	32.85	CC(CC)C([CH2+])(C)C	C=C(C)C(C)CC	[CH3+]	32.85	-32.85	38.15	20.58	-20.58	50.42	CC(CC)C([CH2+])(C)C	C=C(C)C(C)CC	C8H17+	C7H14
C8H17+	C6H12	24.05	46.95	CC(CC)C([CH2+])(C)C	CC1CC1(C)C	[CH2+]C	46.95	-46.95	24.05	34.42	-34.42	36.58	CC(CC)C([CH2+])(C)C	CC1CC1(C)C	C8H17+	C6H12
C8H17+	C8H17+	54.53	16.47	CC(CC[CH2+])CCC	C[C+](CCC)CCC		16.47	-16.47	54.53	26.19	-26.19	44.81	CC(CC[CH2+])CCC	C[C+](CCC)CCC	C8H17+	C8H17+
C8H17+	C8H17+	58.05	12.95	CC(CC[CH2+])CCC	CC(C[CH+]C)CCC		12.95	-12.95	58.05	18.76	-18.76	52.24	CC(CC[CH2+])CCC	CC(C[CH+]C)CCC	C8H17+	C8H17+
C8H17+	C8H17+	33.69	37.31	CC(CC[CH2+])CCC	CC(C[CH+]C)CCC		37.31	-37.31	33.69	43.12	-43.12	27.88	CC(CC[CH2+])CCC	CC(C[CH+]C)CCC	C8H17+	C8H17+
C8H17+	C8H17+	59.48	11.52	CC(CC[CH2+])CCC	CC[CH+]C(C)CCC		11.52	-11.52	59.48	17.33	-17.33	53.67	CC(CC[CH2+])CCC	CC[CH+]C(C)CCC	C8H17+	C8H17+
C8H17+	C8H17+	34.51	36.49	CC(CC[CH2+])CCC	CC[CH+]C(C)CCC		36.49	-36.49	34.51	42.3	-42.3	28.7	CC(CC[CH2+])CCC	CC[CH+]C(C)CCC	C8H17+	C8H17+
C8H17+	C8H17+	57.67	13.33	CC(CC[CH2+])CCC	[CH2+]C(CCC)CCC		13.33	-13.33	57.67	14.38	-14.38	56.62	CC(CC[CH2+])CCC	[CH2+]C(CCC)CCC	C8H17+	C8H17+
C8H17+	C6H12	22.14	48.86	CC(CC[CH2+])CCC	CC1CCCC1	[CH2+]C	48.86	-48.86	22.14	48.43	-48.43	22.57	CC(CC[CH2+])CCC	CC1CCCC1	C8H17+	C6H12
C8H17+	C6H13+	45.81	25.19	CC(CC[CH2+])CCC	[CH2+]C(C)CCC	C=C	25.19	-25.19	45.81	9.67	-9.67	61.33	CC(CC[CH2+])CCC	[CH2+]C(C)CCC	C8H17+	C6H13+
C8H17+	C6H13+	41.02	29.98	CC(CC[CH2+])CCC	[CH2+]C(C)CCC	C=C	29.98	-29.98	41.02	14.46	-14.46	56.54	CC(CC[CH2+])CCC	[CH2+]C(C)CCC	C8H17+	C6H13+
C8H17+	C5H11+	24.57	46.43	CC(CC[CH2+])CCC	CCC[CH+]C	C1CC1	46.43	-46.43	24.57	29.2	-29.2	41.8	CC(CC[CH2+])CCC	CCC[CH+]C	C8H17+	C5H11+
C8H17+	C8H16	36.52	34.48	CC(CC[CH2+])CCC	CC(CC=C)CCC	[H+]	34.48	-34.48	36.52	1.92	-1.92	69.08	CC(CC[CH2+])CCC	CC(CC=C)CCC	C8H17+	C8H16
C8H17+	C8H16	33.68	37.32	CC(CC[CH2+])CCC	CC(CC=C)CCC	[H+]	37.32	-37.32	33.68	4.76	-4.76	66.24	CC(CC[CH2+])CCC	CC(CC=C)CCC	C8H17+	C8H16
C8H17+	C8H17+	33.01	37.99	CC[CH+]C(C)(C)CC	C[CH+]C(C)(C)CCC		37.99	-37.99	33.01	37.73	-37.73	33.27	CC[CH+]C(C)(C)CC	C[CH+]C(C)(C)CCC	C8H17+	C8H17+
C8H17+	C8H17+	30.68	40.32	CC[CH+]C(C)(C)CC	CC(C)(C[CH+]C)CC		40.32	-40.32	30.68	39.37	-39.37	31.63	CC[CH+]C(C)(C)CC	CC(C)(C[CH+]C)CC	C8H17+	C8H17+
C8H17+	C8H17+	47.22	23.78	CC[CH+]C(C)(C)CC	CC(C)(C[CH2+])CCC		23.78	-23.78	47.22	20.37	-20.37	50.63	CC[CH+]C(C)(C)CC	CC(C)(C[CH2+])CCC	C8H17+	C8H17+
C8H17+	C8H17+	31.57	39.43	CC[CH+]C(C)(C)CC	[CH2+]C(C)(CC)CCC		39.43	-39.43	31.57	34.94	-34.94	36.06	CC[CH+]C(C)(C)CC	[CH2+]C(C)(CC)CCC	C8H17+	C8H17+
C8H17+	C8H17+	29.43	41.57	CC[CH+]C(C)(C)CC	CC(C)(CC)CC[CH2+]		41.57	-41.57	29.43	35.59	-35.59	35.41	CC[CH+]C(C)(C)CC	CC(C)(CC)CC[CH2+]	C8H17+	C8H17+
C8H17+	C6H12	45.44	25.56	CC[CH+]C(C)(C)CC	C/C(C)=C\CC	[CH2+]C	25.56	-25.56	45.44	13.93	-13.93	57.07	CC[CH+]C(C)(C)CC	C/C(C)=C\CC	C8H17+	C6H12
C8H17+	C6H12	39.94	31.06	CC[CH+]C(C)(C)CC	C/C(C)=C\CC	[CH2+]C	31.06	-31.06	39.94	19.43	-19.43	51.57	CC[CH+]C(C)(C)CC	C/C(C)=C\CC	C8H17+	C6H12
C8H17+	C7H14	43.57	27.43	CC[CH+]C(C)(C)CC	CC\C=C(/C)CC	[CH3+]	27.43	-27.43	43.57	11.85	-11.85	59.15	CC[CH+]C(C)(C)CC	CC\C=C(/C)CC	C8H17+	C7H14
C8H17+	C7H14	38.65	32.35	CC[CH+]C(C)(C)CC	CC\C=C(/C)CC	[CH3+]	32.35	-32.35	38.65	16.77	-16.77	54.23	CC[CH+]C(C)(C)CC	CC\C=C(/C)CC	C8H17+	C7H14
C8H17+	C7H14	41.74	29.26	CC[CH+]C(C)(C)CC	C=CC(C)(C)CC	[CH3+]	29.26	-29.26	41.74	8.64	-8.64	62.36	CC[CH+]C(C)(C)CC	C=CC(C)(C)CC	C8H17+	C7H14
C8H17+	C7H14	37.81	33.19	CC[CH+]C(C)(C)CC	C=CC(C)(C)CC	[CH3+]	33.19	-33.19	37.81	12.57	-12.57	58.43	CC[CH+]C(C)(C)CC	C=CC(C)(C)CC	C8H17+	C7H14
C8H17+	C8H16	27.12	43.88	CC[CH+]C(C)(C)CC	C\C=C\C(C)(C)CC	[H+]	43.88	-43.88	27.12	4.85	-4.85	66.15	CC[CH+]C(C)(C)CC	C\C=C\C(C)(C)CC	C8H17+	C8H16
C8H17+	C8H17+	34.59	36.41	CC[CH+]C(C)C(C)C	C[C+](CCC)C(C)C		36.41	-36.41	34.59	39.58	-39.58	31.42	CC[CH+]C(C)C(C)C	C[C+](CCC)C(C)C	C8H17+	C8H17+
C8H17+	C8H17+	31.88	39.12	CC[CH+]C(C)C(C)C	C[C+](CCC)C(C)C		39.12	-39.12	31.88	42.29	-42.29	28.71	CC[CH+]C(C)C(C)C	C[C+](CCC)C(C)C	C8H17+	C8H17+
C8H17+	C8H17+	35.04	35.96	CC[CH+]C(C)C(C)C	C[C+](C)C(C)CCC		35.96	-35.96	35.04	38.87	-38.87	32.13	CC[CH+]C(C)C(C)C	C[C+](C)C(C)CCC	C8H17+	C8H17+
C8H17+	C8H17+	30.96	40.04	CC[CH+]C(C)C(C)C	CC(C)C(C)C[CH+]C		40.04	-40.04	30.96	40.06	-40.06	30.94	CC[CH+]C(C)C(C)C	CC(C)C(C)C[CH+]C	C8H17+	C8H17+
C8H17+	C8H17+	28.84	42.16	CC[CH+]C(C)C(C)C	[CH2+]C(CCC)C(C)C		42.16	-42.16	28.84	38.53	-38.53	32.47	CC[CH+]C(C)C(C)C	[CH2+]C(CCC)C(C)C	C8H17+	C8H17+
C8H17+	C8H17+	48.23	22.77	CC[CH+]C(C)C(C)C	[CH2+]C(C)C(C)CCC		22.77	-22.77	48.23	18.57	-18.57	52.43	CC[CH+]C(C)C(C)C	[CH2+]C(C)C(C)CCC	C8H17+	C8H17+
C8H17+	C8H17+	28.92	42.08	CC[CH+]C(C)C(C)C	CC(C)C(C)CC[CH2+]		42.08	-42.08	28.92	36.51	-36.51	34.49	CC[CH+]C(C)C(C)C	CC(C)C(C)CC[CH2+]	C8H17+	C8H17+
C8H17+	C5H10	48.26	22.74	CC[CH+]C(C)C(C)C	C\C=C/CC	C[CH+]C	22.74	-22.74	48.26	12.25	-12.25	58.75	CC[CH+]C(C)C(C)C	C\C=C/CC	C8H17+	C5H10
C8H17+	C5H10	42.25	28.75	CC[CH+]C(C)C(C)C	C\C=C/CC	C[CH+]C	28.75	-28.75	42.25	18.26	-18.26	52.74	CC[CH+]C(C)C(C)C	C\C=C/CC	C8H17+	C5H10
C8H17+	C7H14	42.31	28.69	CC[CH+]C(C)C(C)C	CC\C=C/C(C)C	[CH3+]	28.69	-28.69	42.31	11.96	-11.96	59.04	CC[CH+]C(C)C(C)C	CC\C=C/C(C)C	C8H17+	C7H14
C8H17+	C7H14	40.21	30.79	CC[CH+]C(C)C(C)C	CC\C=C/C(C)C	[CH3+]	30.79	-30.79	40.21	14.06	-14.06	56.94	CC[CH+]C(C)C(C)C	CC\C=C/C(C)C	C8H17+	C7H14
C8H17+	C7H14	41.35	29.65	CC[CH+]C(C)C(C)C	CC(C)C(C)C=C	[CH3+]	29.65	-29.65	41.35	8.07	-8.07	62.93	CC[CH+]C(C)C(C)C	CC(C)C(C)C=C	C8H17+	C7H14
C8H17+	C7H14	37.72	33.28	CC[CH+]C(C)C(C)C	CC(C)C(C)C=C	[CH3+]	33.28	-33.28	37.72	11.7	-11.7	59.3	CC[CH+]C(C)C(C)C	CC(C)C(C)C=C	C8H17+	C7H14
C8H17+	C8H16	35.94	35.06	CC[CH+]C(C)C(C)C	CC\C=C(/C)C(C)C	[H+]	35.06	-35.06	35.94	3.03	-3.03	67.97	CC[CH+]C(C)C(C)C	CC\C=C(/C)C(C)C	C8H17+	C8H16
C8H17+	C8H16	29.97	41.03	CC[CH+]C(C)C(C)C	CC\C=C(/C)C(C)C	[H+]	41.03	-41.03	29.97	9	-9	62	CC[CH+]C(C)C(C)C	CC\C=C(/C)C(C)C	C8H17+	C8H16
C8H17+	C8H16	35.22	35.78	CC[CH+]C(C)C(C)C	CC(C)C(C)\C=C\C	[H+]	35.78	-35.78	35.22	0.96	-0.96	70.04	CC[CH+]C(C)C(C)C	CC(C)C(C)\C=C\C	C8H17+	C8H16
C8H17+	C8H16	28.24	42.76	CC[CH+]C(C)C(C)C	CC(C)C(C)\C=C\C	[H+]	42.76	-42.76	28.24	7.94	-7.94	63.06	CC[CH+]C(C)C(C)C	CC(C)C(C)\C=C\C	C8H17+	C8H16
C8H15+	C8H15+	39.17	31.83	CC1[CH+]CCC(C)C1	C[C+]1CC(C)CCC1		31.83	-31.83	39.17	37.28	-37.28	33.72	CC1[CH+]CCC(C)C1	C[C+]1CC(C)CCC1	C8H15+	C8H15+
C8H15+	C8H15+	37.57	33.43	CC1[CH+]CCC(C)C1	C[C+]1CC(C)CCC1		33.43	-33.43	37.57	38.88	-38.88	32.12	CC1[CH+]CCC(C)C1	C[C+]1CC(C)CCC1	C8H15+	C8H15+
C8H15+	C8H15+	32.23	38.77	CC1[CH+]CCC(C)C1	C[C+]1CC(C)CCC1		38.77	-38.77	32.23	44.22	-44.22	26.78	CC1[CH+]CCC(C)C1	C[C+]1CC(C)CCC1	C8H15+	C8H15+
C8H15+	C8H15+	29.37	41.63	CC1[CH+]CCC(C)C1	CC1C[CH+]CC(C)C1		41.63	-41.63	29.37	41.97	-41.97	29.03	CC1[CH+]CCC(C)C1	CC1C[CH+]CC(C)C1	C8H15+	C8H15+
C8H15+	C8H15+	25.73	45.27	CC1[CH+]CCC(C)C1	CC1[CH+]C(C)CCC1		45.27	-45.27	25.73	43.21	-43.21	27.79	CC1[CH+]CCC(C)C1	CC1[CH+]C(C)CCC1	C8H15+	C8H15+
C8H15+	C8H15+	28.41	42.59	CC1[CH+]CCC(C)C1	[CH2+]C1CCCC(C)C1		42.59	-42.59	28.41	39.87	-39.87	31.13	CC1[CH+]CCC(C)C1	[CH2+]C1CCCC(C)C1	C8H15+	C8H15+
C8H15+	C7H12	43.74	27.26	CC1[CH+]CCC(C)C1	CC1CC=CCC1	[CH3+]	27.26	-27.26	43.74	9.87	-9.87	61.13	CC1[CH+]CCC(C)C1	CC1CC=CCC1	C8H15+	C7H12
C8H15+	C7H12	37.64	33.36	CC1[CH+]CCC(C)C1	CC1CC=CCC1	[CH3+]	33.36	-33.36	37.64	15.97	-15.97	55.03	CC1[CH+]CCC(C)C1	CC1CC=CCC1	C8H15+	C7H12
C8H15+	C8H14	32.7	38.3	CC1[CH+]CCC(C)C1	CC=1CC(C)CCC=1	[H+]	38.3	-38.3	32.7	8.15	-8.15	62.85	CC1[CH+]CCC(C)C1	CC=1CC(C)CCC=1	C8H15+	C8H14
C8H15+	C8H14	36.43	34.57	CC1[CH+]CCC(C)C1	CC1C=CCC(C)C1	[H+]	34.57	-34.57	36.43	0.65	-0.65	70.35	CC1[CH+]CCC(C)C1	CC1C=CCC(C)C1	C8H15+	C8H14
C8H15+	C8H14	35.35	35.65	CC1[CH+]CCC(C)C1	CC1C=CCC(C)C1	[H+]	35.65	-35.65	35.35	1.73	-1.73	69.27	CC1[CH+]CCC(C)C1	CC1C=CCC(C)C1	C8H15+	C8H14
C8H15+	C8H14	31.63	39.37	CC1[CH+]CCC(C)C1	CC1C=CCC(C)C1	[H+]	39.37	-39.37	31.63	5.45	-5.45	65.55	CC1[CH+]CCC(C)C1	CC1C=CCC(C)C1	C8H15+	C8H14
C8H15+	C8H15+	36.82	34.18	CC1[CH+]CCCC1C	C[C+]1CCCCC1C		34.18	-34.18	36.82	38.96	-38.96	32.04	CC1[CH+]CCCC1C	C[C+]1CCCCC1C	C8H15+	C8H15+
C8H15+	C8H15+	32.94	38.06	CC1[CH+]CCCC1C	C[C+]1CCCCC1C		38.06	-38.06	32.94	42.84	-42.84	28.16	CC1[CH+]CCCC1C	C[C+]1CCCCC1C	C8H15+	C8H15+
C8H15+	C8H15+	30.14	40.86	CC1[CH+]CCCC1C	C[C+]1CCCCC1C		40.86	-40.86	30.14	45.64	-45.64	25.36	CC1[CH+]CCCC1C	C[C+]1CCCCC1C	C8H15+	C8H15+
C8H15+	C8H15+	29.2	41.8	CC1[CH+]CCCC1C	CC1C[CH+]CCC1C		41.8	-41.8	29.2	41.86	-41.86	29.14	CC1[CH+]CCCC1C	CC1C[CH+]CCC1C	C8H15+	C8H15+
C8H15+	C8H15+	27.04	43.96	CC1[CH+]CCCC1C	CC1C[CH+]CCC1C		43.96	-43.96	27.04	44.02	-44.02	26.98	CC1[CH+]CCCC1C	CC1C[CH+]CCC1C	C8H15+	C8H15+
C8H15+	C8H15+	28.5	42.5	CC1[CH+]CCCC1C	[CH2+]C1CCCCC1C		42.5	-42.5	28.5	39.37	-39.37	31.63	CC1[CH+]CCCC1C	[CH2+]C1CCCCC1C	C8H15+	C8H15+
C8H15+	C7H12	44.17	26.83	CC1[CH+]CCCC1C	CC1C=CCCC1	[CH3+]	26.83	-26.83	44.17	10.21	-10.21	60.79	CC1[CH+]CCCC1C	CC1C=CCCC1	C8H15+	C7H12
C8H15+	C7H12	35.31	35.69	CC1[CH+]CCCC1C	CC1C=CCCC1	[CH3+]	35.69	-35.69	35.31	19.07	-19.07	51.93	CC1[CH+]CCCC1C	CC1C=CCCC1	C8H15+	C7H12
C8H15+	C8H14	31.81	39.19	CC1[CH+]CCCC1C	CC1=CCCCC1C	[H+]	39.19	-39.19	31.81	8.75	-8.75	62.25	CC1[CH+]CCCC1C	CC1=CCCCC1C	C8H15+	C8H14
C8H15+	C8H14	36.81	34.19	CC1[CH+]CCCC1C	CC1C=CCCC1C	[H+]	34.19	-34.19	36.81	0.66	-0.66	70.34	CC1[CH+]CCCC1C	CC1C=CCCC1C	C8H15+	C8H14
C8H15+	C8H14	35.78	35.22	CC1[CH+]CCCC1C	CC1C=CCCC1C	[H+]	35.22	-35.22	35.78	1.69	-1.69	69.31	CC1[CH+]CCCC1C	CC1C=CCCC1C	C8H15+	C8H14
C8H15+	C8H14	31.6	39.4	CC1[CH+]CCCC1C	CC1C=CCCC1C	[H+]	39.4	-39.4	31.6	5.87	-5.87	65.13	CC1[CH+]CCCC1C	CC1C=CCCC1C	C8H15+	C8H14
C8H15+	C8H15+	33.87	37.13	CC1C[CH+]CC(C)C1	C[C+]1CC(C)CCC1		37.13	-37.13	33.87	46.08	-46.08	24.92	CC1C[CH+]CC(C)C1	C[C+]1CC(C)CCC1	C8H15+	C8H15+
C8H15+	C8H15+	28.71	42.29	CC1C[CH+]CC(C)C1	CC1[CH+]CCC(C)C1		42.29	-42.29	28.71	42.01	-42.01	28.99	CC1C[CH+]CC(C)C1	CC1[CH+]CCC(C)C1	C8H15+	C8H15+
C8H15+	C8H15+	42.53	28.47	CC1C[CH+]CC(C)C1	[CH2+]C1CCCC(C)C1		28.47	-28.47	42.53	22.88	-22.88	48.12	CC1C[CH+]CC(C)C1	[CH2+]C1CCCC(C)C1	C8H15+	C8H15+
C8H15+	C8H14	40.53	30.47	CC1C[CH+]CC(C)C1	CC1C=CCC(C)C1	[H+]	30.47	-30.47	40.53	-3.39	3.39	74.39	CC1C[CH+]CC(C)C1	CC1C=CCC(C)C1	C8H15+	C8H14
C8H15+	C8H14	35.1	35.9	CC1C[CH+]CC(C)C1	CC1C=CCC(C)C1	[H+]	35.9	-35.9	35.1	2.04	-2.04	68.96	CC1C[CH+]CC(C)C1	CC1C=CCC(C)C1	C8H15+	C8H14
C8H15+	C8H14	33.06	37.94	CC1C[CH+]CC(C)C1	CC1C=CCC(C)C1	[H+]	37.94	-37.94	33.06	4.08	-4.08	66.92	CC1C[CH+]CC(C)C1	CC1C=CCC(C)C1	C8H15+	C8H14
C8H15+	C8H14	31.24	39.76	CC1C[CH+]CC(C)C1	CC1C=CCC(C)C1	[H+]	39.76	-39.76	31.24	5.9	-5.9	65.1	CC1C[CH+]CC(C)C1	CC1C=CCC(C)C1	C8H15+	C8H14
C8H15+	C8H15+	38.57	32.43	CC1C[CH+]CCC1C	C[C+]1CCCCC1C		32.43	-32.43	38.57	33.23	-33.23	37.77	CC1C[CH+]CCC1C	C[C+]1CCCCC1C	C8H15+	C8H15+
C8H15+	C8H15+	28.17	42.83	CC1C[CH+]CCC1C	C[C+]1CCCCC1C		42.83	-42.83	28.17	43.63	-43.63	27.37	CC1C[CH+]CCC1C	C[C+]1CCCCC1C	C8H15+	C8H15+
C8H15+	C8H15+	27.97	43.03	CC1C[CH+]CCC1C	CC1[CH+]CCCC1C		43.03	-43.03	27.97	42.31	-42.31	28.69	CC1C[CH+]CCC1C	CC1[CH+]CCCC1C	C8H15+	C8H15+
C8H15+	C8H15+	24.99	46.01	CC1C[CH+]CCC1C	CC1[CH+]CCCC1C		46.01	-46.01	24.99	45.29	-45.29	25.71	CC1C[CH+]CCC1C	CC1[CH+]CCCC1C	C8H15+	C8H15+
C8H15+	C8H15+	43.6	27.4	CC1C[CH+]CCC1C	[CH2+]C1CCCCC1C		27.4	-27.4	43.6	24.28	-24.28	46.72	CC1C[CH+]CCC1C	[CH2+]C1CCCCC1C	C8H15+	C8H15+
C8H15+	C8H14	35.92	35.08	CC1C[CH+]CCC1C	CC1CC=CCC1C	[H+]	35.08	-35.08	35.92	0.52	-0.52	70.48	CC1C[CH+]CCC1C	CC1CC=CCC1C	C8H15+	C8H14
C8H15+	C8H14	34.86	36.14	CC1C[CH+]CCC1C	CC1CC=CCC1C	[H+]	36.14	-36.14	34.86	1.58	-1.58	69.42	CC1C[CH+]CCC1C	CC1CC=CCC1C	C8H15+	C8H14
C8H15+	C8H14	32.9	38.1	CC1C[CH+]CCC1C	CC1CC=CCC1C	[H+]	38.1	-38.1	32.9	3.54	-3.54	67.46	CC1C[CH+]CCC1C	CC1CC=CCC1C	C8H15+	C8H14
C8H15+	C8H14	33.83	37.17	CC1C[CH+]CCC1C	CC1C=CCCC1C	[H+]	37.17	-37.17	33.83	2.6	-2.6	68.4	CC1C[CH+]CCC1C	CC1C=CCCC1C	C8H15+	C8H14
C8H15+	C8H14	32.79	38.21	CC1C[CH+]CCC1C	CC1C=CCCC1C	[H+]	38.21	-38.21	32.79	3.64	-3.64	67.36	CC1C[CH+]CCC1C	CC1C=CCCC1C	C8H15+	C8H14
C8H17+	C8H17+	36.84	34.16	CCCC[CH+]C(C)C	C[C+](C)CCCCC		34.16	-34.16	36.84	38.19	-38.19	32.81	CCCC[CH+]C(C)C	C[C+](C)CCCCC	C8H17+	C8H17+
C8H17+	C8H17+	33.31	37.69	CCCC[CH+]C(C)C	C[C+](C)CCCCC		37.69	-37.69	33.31	41.72	-41.72	29.28	CCCC[CH+]C(C)C	C[C+](C)CCCCC	C8H17+	C8H17+
C8H17+	C8H17+	32.55	38.45	CCCC[CH+]C(C)C	CC(C)C[CH+]CCC		38.45	-38.45	32.55	40.54	-40.54	30.46	CCCC[CH+]C(C)C	CC(C)C[CH+]CCC	C8H17+	C8H17+
C8H17+	C8H17+	33.64	37.36	CCCC[CH+]C(C)C	CC(C)CC[CH+]CC		37.36	-37.36	33.64	38.42	-38.42	32.58	CCCC[CH+]C(C)C	CC(C)CC[CH+]CC	C8H17+	C8H17+
C8H17+	C3H7+	45.75	25.25	CCCC[CH+]C(C)C	[CH2+]CC	C=CC(C)C	25.25	-25.25	45.75	9.12	-9.12	61.88	CCCC[CH+]C(C)C	[CH2+]CC	C8H17+	C3H7+
C8H17+	C3H7+	39.4	31.6	CCCC[CH+]C(C)C	[CH2+]CC	C=CC(C)C	31.6	-31.6	39.4	15.47	-15.47	55.53	CCCC[CH+]C(C)C	[CH2+]CC	C8H17+	C3H7+
C8H17+	C7H14	44.23	26.77	CCCC[CH+]C(C)C	C\C=C\CCCC	[CH3+]	26.77	-26.77	44.23	9.9	-9.9	61.1	CCCC[CH+]C(C)C	C\C=C\CCCC	C8H17+	C7H14
C8H17+	C7H14	40.2	30.8	CCCC[CH+]C(C)C	C\C=C\CCCC	[CH3+]	30.8	-30.8	40.2	13.93	-13.93	57.07	CCCC[CH+]C(C)C	C\C=C\CCCC	C8H17+	C7H14
C8H17+	C8H16	36.95	34.05	CCCC[CH+]C(C)C	C/C(C)=C\CCCC	[H+]	34.05	-34.05	36.95	2.16	-2.16	68.84	CCCC[CH+]C(C)C	C/C(C)=C\CCCC	C8H17+	C8H16
C2H5+	H+	30.66	40.34	[CH2+]C	C=C	[H+]	40.34	-40.34	30.66	2.12	-2.12	68.88	[CH2+]C	[H+]	C2H5+	H+
C6H13+	C2H5+	46.62	24.38	[CH2+]C(C)(C)CC	C=C(C)C	[CH2+]C	24.38	-24.38	46.62	13.76	-13.76	57.24	[CH2+]C(C)(C)CC	[CH2+]C	C6H13+	C2H5+
C6H13+	C2H5+	40.74	30.26	[CH2+]C(C)(C)CC	C=C(C)C	[CH2+]C	30.26	-30.26	40.74	19.64	-19.64	51.36	[CH2+]C(C)(C)CC	[CH2+]C	C6H13+	C2H5+
C6H13+	CH3+	43.73	27.27	[CH2+]C(C)(C)CC	C=C(C)CC	[CH3+]	27.27	-27.27	43.73	12.73	-12.73	58.27	[CH2+]C(C)(C)CC	[CH3+]	C6H13+	CH3+
C6H13+	CH3+	39.11	31.89	[CH2+]C(C)(C)CC	C=C(C)CC	[CH3+]	31.89	-31.89	39.11	17.35	-17.35	53.65	[CH2+]C(C)(C)CC	[CH3+]	C6H13+	CH3+
C4H9+	CH3+	42.35	28.65	[CH2+]C(C)C	C=CC	[CH3+]	28.65	-28.65	42.35	10.35	-10.35	60.65	[CH2+]C(C)C	[CH3+]	C4H9+	CH3+
C4H9+	CH3+	38.21	32.79	[CH2+]C(C)C	C=CC	[CH3+]	32.79	-32.79	38.21	14.49	-14.49	56.51	[CH2+]C(C)C	[CH3+]	C4H9+	CH3+
C4H9+	H+	32.06	38.94	[CH2+]C(C)C	C=C(C)C	[H+]	38.94	-38.94	32.06	7.72	-7.72	63.28	[CH2+]C(C)C	[H+]	C4H9+	H+
C6H13+	C3H7+	49.29	21.71	[CH2+]C(C)C(C)C	C=CC	C[CH+]C	21.71	-21.71	49.29	11.81	-11.81	59.19	[CH2+]C(C)C(C)C	C[CH+]C	C6H13+	C3H7+
C6H13+	C3H7+	42.8	28.2	[CH2+]C(C)C(C)C	C=CC	C[CH+]C	28.2	-28.2	42.8	18.3	-18.3	52.7	[CH2+]C(C)C(C)C	C[CH+]C	C6H13+	C3H7+
C6H13+	CH3+	42.49	28.51	[CH2+]C(C)C(C)C	C=CC(C)C	[CH3+]	28.51	-28.51	42.49	11.53	-11.53	59.47	[CH2+]C(C)C(C)C	[CH3+]	C6H13+	CH3+
C6H13+	CH3+	38.41	32.59	[CH2+]C(C)C(C)C	C=CC(C)C	[CH3+]	32.59	-32.59	38.41	15.61	-15.61	55.39	[CH2+]C(C)C(C)C	[CH3+]	C6H13+	CH3+
C6H13+	H+	30.4	40.6	[CH2+]C(C)C(C)C	C=C(C)C(C)C	[H+]	40.6	-40.6	30.4	9.23	-9.23	61.77	[CH2+]C(C)C(C)C	[H+]	C6H13+	H+
C6H11+	CH3+	43.92	27.08	[CH2+]C(C)C1CC1	C=CC1CC1	[CH3+]	27.08	-27.08	43.92	10.04	-10.04	60.96	[CH2+]C(C)C1CC1	[CH3+]	C6H11+	CH3+
C6H11+	CH3+	39.02	31.98	[CH2+]C(C)C1CC1	C=CC1CC1	[CH3+]	31.98	-31.98	39.02	14.94	-14.94	56.06	[CH2+]C(C)C1CC1	[CH3+]	C6H11+	CH3+
C6H11+	C3H5+	40.98	30.02	[CH2+]C(C)C1CC1	C=CC	[CH+]1CC1	30.02	-30.02	40.98	7.12	-7.12	63.88	[CH2+]C(C)C1CC1	[CH+]1CC1	C6H11+	C3H5+
C6H11+	C3H5+	34.88	36.12	[CH2+]C(C)C1CC1	C=CC	[CH+]1CC1	36.12	-36.12	34.88	13.22	-13.22	57.78	[CH2+]C(C)C1CC1	[CH+]1CC1	C6H11+	C3H5+
C6H11+	H+	37.55	33.45	[CH2+]C(C)C1CC1	C=C(C)C1CC1	[H+]	33.45	-33.45	37.55	3.37	-3.37	67.63	[CH2+]C(C)C1CC1	[H+]	C6H11+	H+
C6H11+	H+	32.79	38.21	[CH2+]C(C)C1CC1	C=C(C)C1CC1	[H+]	38.21	-38.21	32.79	8.13	-8.13	62.87	[CH2+]C(C)C1CC1	[H+]	C6H11+	H+
C6H13+	C3H7+	45.92	25.08	[CH2+]C(C)CCC	C=CC	[CH2+]CC	25.08	-25.08	45.92	11.06	-11.06	59.94	[CH2+]C(C)CCC	[CH2+]CC	C6H13+	C3H7+
C6H13+	C3H7+	40.28	30.72	[CH2+]C(C)CCC	C=CC	[CH2+]CC	30.72	-30.72	40.28	16.7	-16.7	54.3	[CH2+]C(C)CCC	[CH2+]CC	C6H13+	C3H7+
C6H13+	CH3+	43.2	27.8	[CH2+]C(C)CCC	CCCC=C	[CH3+]	27.8	-27.8	43.2	10.1	-10.1	60.9	[CH2+]C(C)CCC	[CH3+]	C6H13+	CH3+
C6H13+	CH3+	39.01	31.99	[CH2+]C(C)CCC	CCCC=C	[CH3+]	31.99	-31.99	39.01	14.29	-14.29	56.71	[CH2+]C(C)CCC	[CH3+]	C6H13+	CH3+
C6H13+	H+	35.59	35.41	[CH2+]C(C)CCC	C=C(C)CCC	[H+]	35.41	-35.41	35.59	3.43	-3.43	67.57	[CH2+]C(C)CCC	[H+]	C6H13+	H+
C6H13+	H+	30.85	40.15	[CH2+]C(C)CCC	C=C(C)CCC	[H+]	40.15	-40.15	30.85	8.17	-8.17	62.83	[CH2+]C(C)CCC	[H+]	C6H13+	H+
C8H17+	C4H9+	46.08	24.92	[CH2+]C(CC)CCCC	C=CCC	CCC[CH2+]	24.92	-24.92	46.08	12.04	-12.04	58.96	[CH2+]C(CC)CCCC	CCC[CH2+]	C8H17+	C4H9+
C8H17+	C4H9+	40.25	30.75	[CH2+]C(CC)CCCC	C=CCC	CCC[CH2+]	30.75	-30.75	40.25	17.87	-17.87	53.13	[CH2+]C(CC)CCCC	CCC[CH2+]	C8H17+	C4H9+
C8H17+	C2H5+	46.62	24.38	[CH2+]C(CC)CCCC	C=CCCCC	[CH2+]C	24.38	-24.38	46.62	11	-11	60	[CH2+]C(CC)CCCC	[CH2+]C	C8H17+	C2H5+
C8H17+	C2H5+	41.23	29.77	[CH2+]C(CC)CCCC	C=CCCCC	[CH2+]C	29.77	-29.77	41.23	16.39	-16.39	54.61	[CH2+]C(CC)CCCC	[CH2+]C	C8H17+	C2H5+
C8H17+	H+	31.6	39.4	[CH2+]C(CC)CCCC	C=C(CC)CCCC	[H+]	39.4	-39.4	31.6	7.75	-7.75	63.25	[CH2+]C(CC)CCCC	[H+]	C8H17+	H+
C6H11+	C2H5+	31.82	39.18	[CH2+]C1(CC)CC1	C=C1CC1	[CH2+]C	39.18	-39.18	31.82	11.81	-11.81	59.19	[CH2+]C1(CC)CC1	[CH2+]C	C6H11+	C2H5+
C6H11+	C2H5+	27.21	43.79	[CH2+]C1(CC)CC1	C=C1CC1	[CH2+]C	43.79	-43.79	27.21	16.42	-16.42	54.58	[CH2+]C1(CC)CC1	[CH2+]C	C6H11+	C2H5+
C6H11+	H+	33.42	37.58	[CH2+]C1CC(C)C1	C=C1CC(C)C1	[H+]	37.58	-37.58	33.42	3.12	-3.12	67.88	[CH2+]C1CC(C)C1	[H+]	C6H11+	H+
C6H11+	H+	29.41	41.59	[CH2+]C1CC(C)C1	C=C1CC(C)C1	[H+]	41.59	-41.59	29.41	7.13	-7.13	63.87	[CH2+]C1CC(C)C1	[H+]	C6H11+	H+
C6H11+	H+	35.29	35.71	[CH2+]C1CCC1C	C=C1CCC1C	[H+]	35.71	-35.71	35.29	3.03	-3.03	67.97	[CH2+]C1CCC1C	[H+]	C6H11+	H+
C6H11+	H+	30.69	40.31	[CH2+]C1CCC1C	C=C1CCC1C	[H+]	40.31	-40.31	30.69	7.63	-7.63	63.37	[CH2+]C1CCC1C	[H+]	C6H11+	H+
C4H9+	H+	31.87	39.13	C[C+](C)C	C=C(C)C	[H+]	39.13	-39.13	31.87	0.65	-0.65	70.35	C[C+](C)C	[H+]	C4H9+	H+
C6H13+	CH3+	43.03	27.97	C[C+](C)C(C)C	C\C=C(/C)C	[CH3+]	27.97	-27.97	43.03	9.27	-9.27	61.73	C[C+](C)C(C)C	[CH3+]	C6H13+	CH3+
C6H13+	CH3+	39.25	31.75	C[C+](C)C(C)C	C\C=C(/C)C	[CH3+]	31.75	-31.75	39.25	13.05	-13.05	57.95	C[C+](C)C(C)C	[CH3+]	C6H13+	CH3+
C6H13+	H+	34.3	36.7	C[C+](C)C(C)C	C/C(C)=C(/C)C	[H+]	36.7	-36.7	34.3	1.08	-1.08	69.92	C[C+](C)C(C)C	[H+]	C6H13+	H+
C6H13+	H+	29.75	41.25	C[C+](C)C(C)C	C/C(C)=C(/C)C	[H+]	41.25	-41.25	29.75	5.63	-5.63	65.37	C[C+](C)C(C)C	[H+]	C6H13+	H+
C6H13+	H+	32.67	38.33	C[C+](C)C(C)C	C=C(C)C(C)C	[H+]	38.33	-38.33	32.67	-0.25	0.25	71.25	C[C+](C)C(C)C	[H+]	C6H13+	H+
C6H13+	H+	31.3	39.7	C[C+](C)C(C)C	C=C(C)C(C)C	[H+]	39.7	-39.7	31.3	1.12	-1.12	69.88	C[C+](C)C(C)C	[H+]	C6H13+	H+
C6H11+	H+	32.48	38.52	C[C+](C)C1CC1	C=C(C)C1CC1	[H+]	38.52	-38.52	32.48	-0.24	0.24	71.24	C[C+](C)C1CC1	[H+]	C6H11+	H+
C6H11+	H+	31.06	39.94	C[C+](C)C1CC1	C=C(C)C1CC1	[H+]	39.94	-39.94	31.06	1.18	-1.18	69.82	C[C+](C)C1CC1	[H+]	C6H11+	H+
C6H11+	H+	26.86	44.14	C[C+](C)C1CC1	C/C(C)=C1/CC1	[H+]	44.14	-44.14	26.86	1.03	-1.03	69.97	C[C+](C)C1CC1	[H+]	C6H11+	H+
C6H13+	C2H5+	45.28	25.72	C[C+](C)CCC	C=C(C)C	[CH2+]C	25.72	-25.72	45.28	8.35	-8.35	62.65	C[C+](C)CCC	[CH2+]C	C6H13+	C2H5+
C6H13+	C2H5+	41.21	29.79	C[C+](C)CCC	C=C(C)C	[CH2+]C	29.79	-29.79	41.21	12.42	-12.42	58.58	C[C+](C)CCC	[CH2+]C	C6H13+	C2H5+
C6H13+	H+	30.19	40.81	C[C+](C)CCC	C/C(C)=C\CC	[H+]	40.81	-40.81	30.19	5.14	-5.14	65.86	C[C+](C)CCC	[H+]	C6H13+	H+
C6H13+	H+	32.47	38.53	C[C+](C)CCC	C=C(C)CCC	[H+]	38.53	-38.53	32.47	0.25	-0.25	70.75	C[C+](C)CCC	[H+]	C6H13+	H+
C6H13+	CH3+	42.76	28.24	C[C+](CC)CC	C=C(C)CC	[CH3+]	28.24	-28.24	42.76	7.66	-7.66	63.34	C[C+](CC)CC	[CH3+]	C6H13+	CH3+
C6H13+	CH3+	39.87	31.13	C[C+](CC)CC	C=C(C)CC	[CH3+]	31.13	-31.13	39.87	10.55	-10.55	60.45	C[C+](CC)CC	[CH3+]	C6H13+	CH3+
C6H13+	H+	34.53	36.47	C[C+](CC)CC	C\C=C(/C)CC	[H+]	36.47	-36.47	34.53	0.54	-0.54	70.46	C[C+](CC)CC	[H+]	C6H13+	H+
C6H13+	H+	32.28	38.72	C[C+](CC)CC	C\C=C(/C)CC	[H+]	38.72	-38.72	32.28	2.79	-2.79	68.21	C[C+](CC)CC	[H+]	C6H13+	H+
C6H13+	H+	31.78	39.22	C[C+](CC)CC	C=C(CC)CC	[H+]	39.22	-39.22	31.78	-0.23	0.23	71.23	C[C+](CC)CC	[H+]	C6H13+	H+
C6H11+	H+	32.25	38.75	C[C+]1CC(C)C1	CC1=CC(C)C1	[H+]	38.75	-38.75	32.25	-0.2	0.2	71.2	C[C+]1CC(C)C1	[H+]	C6H11+	H+
C6H11+	H+	29.13	41.87	C[C+]1CC(C)C1	CC1=CC(C)C1	[H+]	41.87	-41.87	29.13	2.92	-2.92	68.08	C[C+]1CC(C)C1	[H+]	C6H11+	H+
C6H11+	H+	30.67	40.33	C[C+]1CC(C)C1	C=C1CC(C)C1	[H+]	40.33	-40.33	30.67	0.6	-0.6	70.4	C[C+]1CC(C)C1	[H+]	C6H11+	H+
C4H7+	H+	28.58	42.42	C[C+]1CC1	C=C1CC1	[H+]	42.42	-42.42	28.58	2.64	-2.64	68.36	C[C+]1CC1	[H+]	C4H7+	H+
C6H11+	CH3+	38.74	32.26	C[C+]1CCC1C	CC1=CCC1	[CH3+]	32.26	-32.26	38.74	8.18	-8.18	62.82	C[C+]1CCC1C	[CH3+]	C6H11+	CH3+
C6H11+	CH3+	34.87	36.13	C[C+]1CCC1C	CC1=CCC1	[CH3+]	36.13	-36.13	34.87	12.05	-12.05	58.95	C[C+]1CCC1C	[CH3+]	C6H11+	CH3+
C6H11+	H+	34.72	36.28	C[C+]1CCC1C	CC=1CCC=1C	[H+]	36.28	-36.28	34.72	1.24	-1.24	69.76	C[C+]1CCC1C	[H+]	C6H11+	H+
C6H11+	H+	30.71	40.29	C[C+]1CCC1C	CC=1CCC=1C	[H+]	40.29	-40.29	30.71	5.25	-5.25	65.75	C[C+]1CCC1C	[H+]	C6H11+	H+
C6H11+	H+	32.33	38.67	C[C+]1CCC1C	CC1=CCC1C	[H+]	38.67	-38.67	32.33	-0.19	0.19	71.19	C[C+]1CCC1C	[H+]	C6H11+	H+
C6H11+	H+	29.4	41.6	C[C+]1CCC1C	CC1=CCC1C	[H+]	41.6	-41.6	29.4	2.74	-2.74	68.26	C[C+]1CCC1C	[H+]	C6H11+	H+
C6H11+	H+	32.18	38.82	C[C+]1CCC1C	C=C1CCC1C	[H+]	38.82	-38.82	32.18	-0.23	0.23	71.23	C[C+]1CCC1C	[H+]	C6H11+	H+
C6H11+	H+	31.06	39.94	C[C+]1CCC1C	C=C1CCC1C	[H+]	39.94	-39.94	31.06	0.89	-0.89	70.11	C[C+]1CCC1C	[H+]	C6H11+	H+
C6H11+	H+	34.37	36.63	C[C+]1CCCC1	CC1=CCCC1	[H+]	36.63	-36.63	34.37	0.43	-0.43	70.57	C[C+]1CCCC1	[H+]	C6H11+	H+
C6H11+	H+	32.66	38.34	C[C+]1CCCC1	CC1=CCCC1	[H+]	38.34	-38.34	32.66	2.14	-2.14	68.86	C[C+]1CCCC1	[H+]	C6H11+	H+
C6H11+	H+	30.93	40.07	C[C+]1CCCC1	C=C1CCCC1	[H+]	40.07	-40.07	30.93	-0.24	0.24	71.24	C[C+]1CCCC1	[H+]	C6H11+	H+
C6H13+	CH3+	42.84	28.16	C[CH+]C(C)(C)C	C\C=C(/C)C	[CH3+]	28.16	-28.16	42.84	12.1	-12.1	58.9	C[CH+]C(C)(C)C	[CH3+]	C6H13+	CH3+
C6H13+	CH3+	38.38	32.62	C[CH+]C(C)(C)C	C\C=C(/C)C	[CH3+]	32.62	-32.62	38.38	16.56	-16.56	54.44	C[CH+]C(C)(C)C	[CH3+]	C6H13+	CH3+
C6H13+	H+	31.78	39.22	C[CH+]C(C)(C)C	C=CC(C)C	[H+]	39.22	-39.22	31.78	1.74	-1.74	69.26	C[CH+]C(C)(C)C	[H+]	C6H13+	H+
C6H13+	C2H5+	45.23	25.77	C[CH+]C(C)CC	C\C=C/C	[CH2+]C	25.77	-25.77	45.23	10.69	-10.69	60.31	C[CH+]C(C)CC	[CH2+]C	C6H13+	C2H5+
C6H13+	C2H5+	40.18	30.82	C[CH+]C(C)CC	C\C=C/C	[CH2+]C	30.82	-30.82	40.18	15.74	-15.74	55.26	C[CH+]C(C)CC	[CH2+]C	C6H13+	C2H5+
C6H13+	CH3+	42.9	28.1	C[CH+]C(C)CC	C\C=C/CC	[CH3+]	28.1	-28.1	42.9	9.86	-9.86	61.14	C[CH+]C(C)CC	[CH3+]	C6H13+	CH3+
C6H13+	CH3+	40.59	30.41	C[CH+]C(C)CC	C\C=C/CC	[CH3+]	30.41	-30.41	40.59	12.17	-12.17	58.83	C[CH+]C(C)CC	[CH3+]	C6H13+	CH3+
C6H13+	H+	35.48	35.52	C[CH+]C(C)CC	C\C=C(/C)CC	[H+]	35.52	-35.52	35.48	2.95	-2.95	68.05	C[CH+]C(C)CC	[H+]	C6H13+	H+
C6H13+	H+	29.28	41.72	C[CH+]C(C)CC	C\C=C(/C)CC	[H+]	41.72	-41.72	29.28	9.15	-9.15	61.85	C[CH+]C(C)CC	[H+]	C6H13+	H+
C6H13+	H+	34.73	36.27	C[CH+]C(C)CC	C=CC(C)CC	[H+]	36.27	-36.27	34.73	0.05	-0.05	70.95	C[CH+]C(C)CC	[H+]	C6H13+	H+
C6H13+	H+	31.11	39.89	C[CH+]C(C)CC	C=CC(C)CC	[H+]	39.89	-39.89	31.11	3.67	-3.67	67.33	C[CH+]C(C)CC	[H+]	C6H13+	H+
C6H11+	CH3+	31.24	39.76	C[CH+]C1(C)CC1	C\C=C1/CC1	[CH3+]	39.76	-39.76	31.24	10.24	-10.24	60.76	C[CH+]C1(C)CC1	[CH3+]	C6H11+	CH3+
C6H11+	CH3+	27.55	43.45	C[CH+]C1(C)CC1	C\C=C1/CC1	[CH3+]	43.45	-43.45	27.55	13.93	-13.93	57.07	C[CH+]C1(C)CC1	[CH3+]	C6H11+	CH3+
C6H11+	H+	31.06	39.94	C[CH+]C1(C)CC1	C=CC1(C)CC1	[H+]	39.94	-39.94	31.06	0.25	-0.25	70.75	C[CH+]C1(C)CC1	[H+]	C6H11+	H+
C4H9+	CH3+	42.37	28.63	C[CH+]CC	C=CC	[CH3+]	28.63	-28.63	42.37	7.76	-7.76	63.24	C[CH+]CC	[CH3+]	C4H9+	CH3+
C4H9+	H+	35.85	35.15	C[CH+]CC	C\C=C\C	[H+]	35.15	-35.15	35.85	1.03	-1.03	69.97	C[CH+]CC	[H+]	C4H9+	H+
C4H9+	H+	31.39	39.61	C[CH+]CC	C\C=C\C	[H+]	39.61	-39.61	31.39	5.49	-5.49	65.51	C[CH+]CC	[H+]	C4H9+	H+
C4H9+	H+	30.91	40.09	C[CH+]CC	C=CCC	[H+]	40.09	-40.09	30.91	1.79	-1.79	69.21	C[CH+]CC	[H+]	C4H9+	H+
C6H13+	C3H7+	44.4	26.6	C[CH+]CCCC	C=CC	[CH2+]CC	26.6	-26.6	44.4	8.98	-8.98	62.02	C[CH+]CCCC	[CH2+]CC	C6H13+	C3H7+
C6H13+	C3H7+	40.17	30.83	C[CH+]CCCC	C=CC	[CH2+]CC	30.83	-30.83	40.17	13.21	-13.21	57.79	C[CH+]CCCC	[CH2+]CC	C6H13+	C3H7+
C6H13+	H+	30.63	40.37	C[CH+]CCCC	CCC\C=C\C	[H+]	40.37	-40.37	30.63	4.81	-4.81	66.19	C[CH+]CCCC	[H+]	C6H13+	H+
C6H13+	H+	31.22	39.78	C[CH+]CCCC	C=CCCCC	[H+]	39.78	-39.78	31.22	1.49	-1.49	69.51	C[CH+]CCCC	[H+]	C6H13+	H+
C4H7+	H+	31.06	39.94	C1[CH+]CC1	C1=CCC1	[H+]	39.94	-39.94	31.06	0.64	-0.64	70.36	C1[CH+]CC1	[H+]	C4H7+	H+
C4H7+	H+	28.79	42.21	C1[CH+]CC1	C1=CCC1	[H+]	42.21	-42.21	28.79	2.91	-2.91	68.09	C1[CH+]CC1	[H+]	C4H7+	H+
C6H11+	H+	35.51	35.49	C1C[CH+]CCC1	C1C=CCCC1	[H+]	35.49	-35.49	35.51	0.53	-0.53	70.47	C1C[CH+]CCC1	[H+]	C6H11+	H+
C6H11+	H+	34.42	36.58	C1C[CH+]CCC1	C1C=CCCC1	[H+]	36.58	-36.58	34.42	1.62	-1.62	69.38	C1C[CH+]CCC1	[H+]	C6H11+	H+
C6H11+	H+	32.47	38.53	C1C[CH+]CCC1	C1C=CCCC1	[H+]	38.53	-38.53	32.47	3.57	-3.57	67.43	C1C[CH+]CCC1	[H+]	C6H11+	H+
C6H13+	C2H4	50.61	20.39	CC(C)(C)C[CH2+]	C[C+](C)C	C=C	20.39	-20.39	50.61	8.94	-8.94	62.06	CC(C)(C)C[CH2+]	C=C	C6H13+	C2H4
C6H13+	C2H4	43.78	27.22	CC(C)(C)C[CH2+]	C[C+](C)C	C=C	27.22	-27.22	43.78	15.77	-15.77	55.23	CC(C)(C)C[CH2+]	C=C	C6H13+	C2H4
C6H13+	H+	33.76	37.24	CC(C)(C)C[CH2+]	C=CC(C)(C)C	[H+]	37.24	-37.24	33.76	2.68	-2.68	68.32	CC(C)(C)C[CH2+]	[H+]	C6H13+	H+
C6H13+	H+	30.21	40.79	CC(C)(C)C[CH2+]	C=CC(C)(C)C	[H+]	40.79	-40.79	30.21	6.23	-6.23	64.77	CC(C)(C)C[CH2+]	[H+]	C6H13+	H+
C6H11+	CH3+	41.92	29.08	CC(C)[C+]1CC1	C\C=C1/CC1	[CH3+]	29.08	-29.08	41.92	9.5	-9.5	61.5	CC(C)[C+]1CC1	[CH3+]	C6H11+	CH3+
C6H11+	CH3+	36.65	34.35	CC(C)[C+]1CC1	C\C=C1/CC1	[CH3+]	34.35	-34.35	36.65	14.77	-14.77	56.23	CC(C)[C+]1CC1	[CH3+]	C6H11+	CH3+
C6H11+	H+	31.05	39.95	CC(C)[C+]1CC1	C/C(C)=C1\CC1	[H+]	39.95	-39.95	31.05	7.38	-7.38	63.62	CC(C)[C+]1CC1	[H+]	C6H11+	H+
C6H13+	C3H6	46.59	24.41	CC(C)C[CH+]C	C[CH+]C	C=CC	24.41	-24.41	46.59	9.07	-9.07	61.93	CC(C)C[CH+]C	C=CC	C6H13+	C3H6
C6H13+	C3H6	40.64	30.36	CC(C)C[CH+]C	C[CH+]C	C=CC	30.36	-30.36	40.64	15.02	-15.02	55.98	CC(C)C[CH+]C	C=CC	C6H13+	C3H6
C6H13+	H+	34.63	36.37	CC(C)C[CH+]C	C\C=C/C(C)C	[H+]	36.37	-36.37	34.63	0.06	-0.06	70.94	CC(C)C[CH+]C	[H+]	C6H13+	H+
C6H13+	H+	29.63	41.37	CC(C)C[CH+]C	C\C=C/C(C)C	[H+]	41.37	-41.37	29.63	5.06	-5.06	65.94	CC(C)C[CH+]C	[H+]	C6H13+	H+
C6H13+	H+	30.77	40.23	CC(C)C[CH+]C	CC(C)CC=C	[H+]	40.23	-40.23	30.77	0.1	-0.1	70.9	CC(C)C[CH+]C	[H+]	C6H13+	H+
C6H11+	C3H4	34.14	36.86	CC(C)C1[CH+]C1	C[CH+]C	C1=CC1	36.86	-36.86	34.14	6.18	-6.18	64.82	CC(C)C1[CH+]C1	C1=CC1	C6H11+	C3H4
C6H11+	C3H4	26.13	44.87	CC(C)C1[CH+]C1	C[CH+]C	C1=CC1	44.87	-44.87	26.13	14.19	-14.19	56.81	CC(C)C1[CH+]C1	C1=CC1	C6H11+	C3H4
C6H13+	C2H4	44.29	26.71	CC(C)CC[CH2+]	[CH2+]C(C)C	C=C	26.71	-26.71	44.29	8.96	-8.96	62.04	CC(C)CC[CH2+]	C=C	C6H13+	C2H4
C6H13+	C2H4	39.84	31.16	CC(C)CC[CH2+]	[CH2+]C(C)C	C=C	31.16	-31.16	39.84	13.41	-13.41	57.59	CC(C)CC[CH2+]	C=C	C6H13+	C2H4
C6H13+	H+	34.88	36.12	CC(C)CC[CH2+]	C=CC(C)(C)C	[H+]	36.12	-36.12	34.88	2.14	-2.14	68.86	CC(C)CC[CH2+]	[H+]	C6H13+	H+
C6H13+	H+	32.33	38.67	CC(C)CC[CH2+]	C=CC(C)(C)C	[H+]	38.67	-38.67	32.33	4.69	-4.69	66.31	CC(C)CC[CH2+]	[H+]	C6H13+	H+
C6H13+	C2H4	48.22	22.78	CC(C[CH2+])CC	C[CH+]CC	C=C	22.78	-22.78	48.22	9.43	-9.43	61.57	CC(C[CH2+])CC	C=C	C6H13+	C2H4
C6H13+	C2H4	42.35	28.65	CC(C[CH2+])CC	C[CH+]CC	C=C	28.65	-28.65	42.35	15.3	-15.3	55.7	CC(C[CH2+])CC	C=C	C6H13+	C2H4
C6H13+	H+	31.59	39.41	CC(C[CH2+])CC	C=CC(C)CC	[H+]	39.41	-39.41	31.59	4.99	-4.99	66.01	CC(C[CH2+])CC	[H+]	C6H13+	H+
C6H13+	CH3+	44.88	26.12	CC[CH+]C(C)C	C\C=C\CC	[CH3+]	26.12	-26.12	44.88	10.31	-10.31	60.69	CC[CH+]C(C)C	[CH3+]	C6H13+	CH3+
C6H13+	CH3+	41.22	29.78	CC[CH+]C(C)C	C\C=C\CC	[CH3+]	29.78	-29.78	41.22	13.97	-13.97	57.03	CC[CH+]C(C)C	[CH3+]	C6H13+	CH3+
C6H13+	CH3+	44.53	26.47	CC[CH+]C(C)C	C=CC(C)C	[CH3+]	26.47	-26.47	44.53	7.96	-7.96	63.04	CC[CH+]C(C)C	[CH3+]	C6H13+	CH3+
C6H13+	CH3+	40.16	30.84	CC[CH+]C(C)C	C=CC(C)C	[CH3+]	30.84	-30.84	40.16	12.33	-12.33	58.67	CC[CH+]C(C)C	[CH3+]	C6H13+	CH3+
C6H13+	H+	33.74	37.26	CC[CH+]C(C)C	C/C(C)=C\CC	[H+]	37.26	-37.26	33.74	6.4	-6.4	64.6	CC[CH+]C(C)C	[H+]	C6H13+	H+
C6H13+	H+	29.79	41.21	CC[CH+]C(C)C	C\C=C/C(C)C	[H+]	41.21	-41.21	29.79	3.91	-3.91	67.09	CC[CH+]C(C)C	[H+]	C6H13+	H+
C6H11+	C2H4	42.37	28.63	CC1(C[CH2+])CC1	C[C+]1CC1	C=C	28.63	-28.63	42.37	5.47	-5.47	65.53	CC1(C[CH2+])CC1	C=C	C6H11+	C2H4
C6H11+	C2H4	35.34	35.66	CC1(C[CH2+])CC1	C[C+]1CC1	C=C	35.66	-35.66	35.34	12.5	-12.5	58.5	CC1(C[CH2+])CC1	C=C	C6H11+	C2H4
C6H11+	H+	35.73	35.27	CC1(C[CH2+])CC1	C=CC1(C)CC1	[H+]	35.27	-35.27	35.73	2.19	-2.19	68.81	CC1(C[CH2+])CC1	[H+]	C6H11+	H+
C6H11+	H+	31.44	39.56	CC1(C[CH2+])CC1	C=CC1(C)CC2	[H+]	39.56	-39.56	31.44	6.48	-6.48	64.52	CC1(C[CH2+])CC1	[H+]	C6H11+	H+
C6H11+	C2H5+	32.45	38.55	CC1(CC)[CH+]C1	CC1=CC1	[CH2+]C	38.55	-38.55	32.45	9.27	-9.27	61.73	CC1(CC)[CH+]C1	[CH2+]C	C6H11+	C2H5+
C6H11+	C2H5+	24.35	46.65	CC1(CC)[CH+]C1	CC1=CC1	[CH2+]C	46.65	-46.65	24.35	17.37	-17.37	53.63	CC1(CC)[CH+]C1	[CH2+]C	C6H11+	C2H5+
C6H11+	CH3+	28.67	42.33	CC1(CC)[CH+]C1	CCC1=CC1	[CH3+]	42.33	-42.33	28.67	9.83	-9.83	61.17	CC1(CC)[CH+]C1	[CH3+]	C6H11+	CH3+
C6H11+	CH3+	37.78	33.22	CC1[CH+]C(C)C1	CC1C=CC1	[CH3+]	33.22	-33.22	37.78	8.78	-8.78	62.22	CC1[CH+]C(C)C1	[CH3+]	C6H11+	CH3+
C6H11+	CH3+	34.26	36.74	CC1[CH+]C(C)C1	CC1C=CC1	[CH3+]	36.74	-36.74	34.26	12.3	-12.3	58.7	CC1[CH+]C(C)C1	[CH3+]	C6H11+	CH3+
C6H11+	H+	30	41	CC1[CH+]C(C)C1	CC1=CC(C)C1	[H+]	41	-41	30	6.22	-6.22	64.78	CC1[CH+]C(C)C1	[H+]	C6H11+	H+
C4H7+	CH3+	27.08	43.92	CC1[CH+]C1	C1=CC1	[CH3+]	43.92	-43.92	27.08	5.91	-5.91	65.09	CC1[CH+]C1	[CH3+]	C4H7+	CH3+
C6H11+	CH3+	38.24	32.76	CC1[CH+]CC1C	CC1C=CC1	[CH3+]	32.76	-32.76	38.24	9.73	-9.73	61.27	CC1[CH+]CC1C	[CH3+]	C6H11+	CH3+
C6H11+	CH3+	35.87	35.13	CC1[CH+]CC1C	CC1C=CC1	[CH3+]	35.13	-35.13	35.87	12.1	-12.1	58.9	CC1[CH+]CC1C	[CH3+]	C6H11+	CH3+
C6H11+	H+	31.34	39.66	CC1[CH+]CC1C	CC1=CCC1C	[H+]	39.66	-39.66	31.34	6.13	-6.13	64.87	CC1[CH+]CC1C	[H+]	C6H11+	H+
C6H11+	H+	31.15	39.85	CC1[CH+]CC1C	CC1C=CC1C	[H+]	39.85	-39.85	31.15	0.87	-0.87	70.13	CC1[CH+]CC1C	[H+]	C6H11+	H+
C6H11+	H+	28.77	42.23	CC1[CH+]CC1C	CC1C=CC1C	[H+]	42.23	-42.23	28.77	3.25	-3.25	67.75	CC1[CH+]CC1C	[H+]	C6H11+	H+
C6H11+	CH3+	41.15	29.85	CC1[CH+]CCC1	C1C=CCC1	[CH3+]	29.85	-29.85	41.15	9.02	-9.02	61.98	CC1[CH+]CCC1	[CH3+]	C6H11+	CH3+
C6H11+	CH3+	37.2	33.8	CC1[CH+]CCC1	C1C=CCC1	[CH3+]	33.8	-33.8	37.2	12.97	-12.97	58.03	CC1[CH+]CCC1	[CH3+]	C6H11+	CH3+
C6H11+	H+	32.49	38.51	CC1[CH+]CCC1	CC1=CCCC1	[H+]	38.51	-38.51	32.49	5.76	-5.76	65.24	CC1[CH+]CCC1	[H+]	C6H11+	H+
C6H11+	H+	34.51	36.49	CC1[CH+]CCC1	CC1C=CCC1	[H+]	36.49	-36.49	34.51	0.32	-0.32	70.68	CC1[CH+]CCC1	[H+]	C6H11+	H+
C6H11+	H+	30.3	40.7	CC1[CH+]CCC1	CC1C=CCC1	[H+]	40.7	-40.7	30.3	4.53	-4.53	66.47	CC1[CH+]CCC1	[H+]	C6H11+	H+
C6H11+	H+	33.76	37.24	CC1C[CH+]CC1	CC1C=CCC1	[H+]	37.24	-37.24	33.76	0.73	-0.73	70.27	CC1C[CH+]CC1	[H+]	C6H11+	H+
C6H11+	H+	30.76	40.24	CC1C[CH+]CC1	CC1C=CCC1	[H+]	40.24	-40.24	30.76	3.73	-3.73	67.27	CC1C[CH+]CC1	[H+]	C6H11+	H+
C6H11+	H+	34.13	36.87	CC1C[CH+]CC1	CC1CC=CC1	[H+]	36.87	-36.87	34.13	0.24	-0.24	70.76	CC1C[CH+]CC1	[H+]	C6H11+	H+
C6H11+	H+	33.04	37.96	CC1C[CH+]CC1	CC1CC=CC1	[H+]	37.96	-37.96	33.04	1.33	-1.33	69.67	CC1C[CH+]CC1	[H+]	C6H11+	H+
C6H11+	H+	29.83	41.17	CC1C[CH+]CC1	CC1CC=CC1	[H+]	41.17	-41.17	29.83	4.54	-4.54	66.46	CC1C[CH+]CC1	[H+]	C6H11+	H+
C6H13+	C2H5+	44.89	26.11	CCC[CH+]CC	C=CCC	[CH2+]C	26.11	-26.11	44.89	8.44	-8.44	62.56	CCC[CH+]CC	[CH2+]C	C6H13+	C2H5+
C6H13+	C2H5+	40.02	30.98	CCC[CH+]CC	C=CCC	[CH2+]C	30.98	-30.98	40.02	13.31	-13.31	57.69	CCC[CH+]CC	[CH2+]C	C6H13+	C2H5+
C6H13+	CH3+	42.52	28.48	CCC[CH+]CC	CCCC=C	[CH3+]	28.48	-28.48	42.52	7.57	-7.57	63.43	CCC[CH+]CC	[CH3+]	C6H13+	CH3+
C6H13+	CH3+	38.48	32.52	CCC[CH+]CC	CCCC=C	[CH3+]	32.52	-32.52	38.48	11.61	-11.61	59.39	CCC[CH+]CC	[CH3+]	C6H13+	CH3+
C6H13+	H+	31.26	39.74	CCC[CH+]CC	CC\C=C/CC	[H+]	39.74	-39.74	31.26	4.16	-4.16	66.84	CCC[CH+]CC	[H+]	C6H13+	H+
C6H13+	H+	31.04	39.96	CCC[CH+]CC	CCC/C=C\C	[H+]	39.96	-39.96	31.04	4.26	-4.26	66.74	CCC[CH+]CC	[H+]	C6H13+	H+
C4H9+	C2H4	44.44	26.56	CCC[CH2+]	[CH2+]C	C=C	26.56	-26.56	44.44	8.45	-8.45	62.55	CCC[CH2+]	C=C	C4H9+	C2H4
C4H9+	C2H4	39.7	31.3	CCC[CH2+]	[CH2+]C	C=C	31.3	-31.3	39.7	13.19	-13.19	57.81	CCC[CH2+]	C=C	C4H9+	C2H4
C4H9+	H+	32	39	CCC[CH2+]	C=CCC	[H+]	39	-39	32	4.92	-4.92	66.08	CCC[CH2+]	[H+]	C4H9+	H+
C6H13+	C2H4	44.71	26.29	CCCCC[CH2+]	CCC[CH2+]	C=C	26.29	-26.29	44.71	9.31	-9.31	61.69	CCCCC[CH2+]	C=C	C6H13+	C2H4
C6H13+	C2H4	40.16	30.84	CCCCC[CH2+]	CCC[CH2+]	C=C	30.84	-30.84	40.16	13.86	-13.86	57.14	CCCCC[CH2+]	C=C	C6H13+	C2H4
C6H13+	H+	34.71	36.29	CCCCC[CH2+]	C=CCCCC	[H+]	36.29	-36.29	34.71	2.28	-2.28	68.72	CCCCC[CH2+]	[H+]	C6H13+	H+
C6H13+	H+	32.14	38.86	CCCCC[CH2+]	C=CCCCC	[H+]	38.86	-38.86	32.14	4.85	-4.85	66.15	CCCCC[CH2+]	[H+]	C6H13+	H+
C8H17+	CH3+	22.46	48.54	[CH2+]C(C)C(C)CCC	CC1CCCC1C	[CH3+]	48.54	-48.54	22.46	46.02	-46.02	24.98	[CH2+]C(C)C(C)CCC	[CH3+]	C8H17+	CH3+
C8H17+	C5H11+	50.49	20.51	[CH2+]C(C)C(C)CCC	C=CC	CCC[CH+]C	20.51	-20.51	50.49	13.96	-13.96	57.04	[CH2+]C(C)C(C)CCC	CCC[CH+]C	C8H17+	C5H11+
C8H17+	C5H11+	43.78	27.22	[CH2+]C(C)C(C)CCC	C=CC	CCC[CH+]C	27.22	-27.22	43.78	20.67	-20.67	50.33	[CH2+]C(C)C(C)CCC	CCC[CH+]C	C8H17+	C5H11+
C8H17+	CH3+	45.16	25.84	[CH2+]C(C)C(C)CCC	C=CC(C)CCC	[CH3+]	25.84	-25.84	45.16	12.92	-12.92	58.08	[CH2+]C(C)C(C)CCC	[CH3+]	C8H17+	CH3+
C8H17+	CH3+	42.51	28.49	[CH2+]C(C)C(C)CCC	C=CC(C)CCC	[CH3+]	28.49	-28.49	42.51	15.57	-15.57	55.43	[CH2+]C(C)C(C)CCC	[CH3+]	C8H17+	CH3+
C8H17+	CH3+	38.35	32.65	[CH2+]C(C)C(C)CCC	C=CC(C)CCC	[CH3+]	32.65	-32.65	38.35	19.73	-19.73	51.27	[CH2+]C(C)C(C)CCC	[CH3+]	C8H17+	CH3+
C8H17+	H+	30.47	40.53	[CH2+]C(C)C(C)CCC	C=C(C)C(C)CCC	[H+]	40.53	-40.53	30.47	9.43	-9.43	61.57	[CH2+]C(C)C(C)CCC	[H+]	C8H17+	H+
C8H15+	C2H5+	22.76	48.24	[CH2+]CC1CC1CCC	C1C2CCCC12	[CH2+]C	48.24	-48.24	22.76	49.54	-49.54	21.46	[CH2+]CC1CC1CCC	[CH2+]C	C8H15+	C2H5+
C8H15+	C2H4	41.36	29.64	[CH2+]CC1CC1CCC	CCCC1[CH+]C1	C=C	29.64	-29.64	41.36	6.22	-6.22	64.78	[CH2+]CC1CC1CCC	C=C	C8H15+	C2H4
C8H15+	C2H4	36.52	34.48	[CH2+]CC1CC1CCC	CCCC1[CH+]C1	C=C	34.48	-34.48	36.52	11.06	-11.06	59.94	[CH2+]CC1CC1CCC	C=C	C8H15+	C2H4
C8H15+	H+	31.07	39.93	[CH2+]CC1CC1CCC	C=CC1CC1CCC	[H+]	39.93	-39.93	31.07	8.56	-8.56	62.44	[CH2+]CC1CC1CCC	[H+]	C8H15+	H+
C8H17+	C4H9+	45.72	25.28	C[C+](C)CCCCC	C=C(C)C	CCC[CH2+]	25.28	-25.28	45.72	9.17	-9.17	61.83	C[C+](C)CCCCC	CCC[CH2+]	C8H17+	C4H9+
C8H17+	C4H9+	41.71	29.29	C[C+](C)CCCCC	C=C(C)C	CCC[CH2+]	29.29	-29.29	41.71	13.18	-13.18	57.82	C[C+](C)CCCCC	CCC[CH2+]	C8H17+	C4H9+
C8H17+	H+	32.61	38.39	C[C+](C)CCCCC	C/C(C)=C\CCCC	[H+]	38.39	-38.39	32.61	3.44	-3.44	67.56	C[C+](C)CCCCC	[H+]	C8H17+	H+
C8H17+	H+	32.57	38.43	C[C+](C)CCCCC	C=C(C)CCCCC	[H+]	38.43	-38.43	32.57	0.18	-0.18	70.82	C[C+](C)CCCCC	[H+]	C8H17+	H+
C8H15+	C3H7+	31.74	39.26	C[C+]1C(C)C1CCC	CC1=CC1C	[CH2+]CC	39.26	-39.26	31.74	7.04	-7.04	63.96	C[C+]1C(C)C1CCC	[CH2+]CC	C8H15+	C3H7+
C8H15+	CH3+	28.86	42.14	C[C+]1C(C)C1CCC	CC1=CC1CCC	[CH3+]	42.14	-42.14	28.86	6.12	-6.12	64.88	C[C+]1C(C)C1CCC	[CH3+]	C8H15+	CH3+
C8H15+	CH3+	27.39	43.61	C[C+]1C(C)C1CCC	CC1=CC1CCC	[CH3+]	43.61	-43.61	27.39	7.59	-7.59	63.41	C[C+]1C(C)C1CCC	[CH3+]	C8H15+	CH3+
C8H15+	H+	32.28	38.72	C[C+]1C(C)C1CCC	C=C1C(C)C1CCC	[H+]	38.72	-38.72	32.28	-0.23	0.23	71.23	C[C+]1C(C)C1CCC	[H+]	C8H15+	H+
C8H15+	H+	29.61	41.39	C[C+]1C(C)C1CCC	C=C1C(C)C1CCC	[H+]	41.39	-41.39	29.61	2.44	-2.44	68.56	C[C+]1C(C)C1CCC	[H+]	C8H15+	H+
C8H15+	H+	31.16	39.84	C[CH+]C1CC1CCC	C=CC1CC1CCC	[H+]	39.84	-39.84	31.16	0.53	-0.53	70.47	C[CH+]C1CC1CCC	[H+]	C8H15+	H+
C8H17+	C5H10	47.62	23.38	CC(C)C[CH+]CCC	C[CH+]C	CCCC=C	23.38	-23.38	47.62	8.89	-8.89	62.11	CC(C)C[CH+]CCC	CCCC=C	C8H17+	C5H10
C8H17+	C5H10	41.91	29.09	CC(C)C[CH+]CCC	C[CH+]C	CCCC=C	29.09	-29.09	41.91	14.6	-14.6	56.4	CC(C)C[CH+]CCC	CCCC=C	C8H17+	C5H10
C8H17+	C2H5+	44.92	26.08	CC(C)C[CH+]CCC	CC(C)CC=C	[CH2+]C	26.08	-26.08	44.92	8.64	-8.64	62.36	CC(C)C[CH+]CCC	[CH2+]C	C8H17+	C2H5+
C8H17+	C2H5+	40.58	30.42	CC(C)C[CH+]CCC	CC(C)CC=C	[CH2+]C	30.42	-30.42	40.58	12.98	-12.98	58.02	CC(C)C[CH+]CCC	[CH2+]C	C8H17+	C2H5+
C8H17+	H+	35.04	35.96	CC(C)C[CH+]CCC	CCC\C=C/C(C)C	[H+]	35.96	-35.96	35.04	0.45	-0.45	70.55	CC(C)C[CH+]CCC	[H+]	C8H17+	H+
C8H17+	H+	30.55	40.45	CC(C)C[CH+]CCC	CCC\C=C/C(C)C	[H+]	40.45	-40.45	30.55	4.94	-4.94	66.06	CC(C)C[CH+]CCC	[H+]	C8H17+	H+
C8H17+	H+	35.98	35.02	CC(C)C[CH+]CCC	CC(C)C/C=C\CC	[H+]	35.02	-35.02	35.98	1.54	-1.54	69.46	CC(C)C[CH+]CCC	[H+]	C8H17+	H+
C8H17+	H+	32.73	38.27	CC(C)C[CH+]CCC	CC(C)C/C=C\CC	[H+]	38.27	-38.27	32.73	4.79	-4.79	66.21	CC(C)C[CH+]CCC	[H+]	C8H17+	H+
C8H17+	C3H6	47.44	23.56	CC(C)CCC[CH+]C	CC(C)C[CH2+]	C=CC	23.56	-23.56	47.44	9.73	-9.73	61.27	CC(C)CCC[CH+]C	C=CC	C8H17+	C3H6
C8H17+	C3H6	40.76	30.24	CC(C)CCC[CH+]C	CC(C)C[CH2+]	C=CC	30.24	-30.24	40.76	16.41	-16.41	54.59	CC(C)CCC[CH+]C	C=CC	C8H17+	C3H6
C8H17+	H+	32.27	38.73	CC(C)CCC[CH+]C	CC(C)CC/C=C\C	[H+]	38.73	-38.73	32.27	5.78	-5.78	65.22	CC(C)CCC[CH+]C	[H+]	C8H17+	H+
C8H17+	H+	32.01	38.99	CC(C)CCC[CH+]C	CC(C)CCCC=C	[H+]	38.99	-38.99	32.01	3.78	-3.78	67.22	CC(C)CCC[CH+]C	[H+]	C8H17+	H+
C8H17+	C5H10	22.75	48.25	CC(C)CCCC[CH2+]	C[CH+]C	C1CCCC1	48.25	-48.25	22.75	49.49	-49.49	21.51	CC(C)CCCC[CH2+]	C1CCCC1	C8H17+	C5H10
C8H17+	C2H4	45.59	25.41	CC(C)CCCC[CH2+]	CC(C)CC[CH2+]	C=C	25.41	-25.41	45.59	8.6	-8.6	62.4	CC(C)CCCC[CH2+]	C=C	C8H17+	C2H4
C8H17+	C2H4	40.11	30.89	CC(C)CCCC[CH2+]	CC(C)CC[CH2+]	C=C	30.89	-30.89	40.11	14.08	-14.08	56.92	CC(C)CCCC[CH2+]	C=C	C8H17+	C2H4
C8H17+	H+	32.14	38.86	CC(C)CCCC[CH2+]	CC(C)CCCC=C	[H+]	38.86	-38.86	32.14	4.89	-4.89	66.11	CC(C)CCCC[CH2+]	[H+]	C8H17+	H+
C8H17+	C3H6	48.85	22.15	CC(C[CH+]C)CCC	CCC[CH+]C	C=CC	22.15	-22.15	48.85	9.17	-9.17	61.83	CC(C[CH+]C)CCC	C=CC	C8H17+	C3H6
C8H17+	C3H6	43.06	27.94	CC(C[CH+]C)CCC	CCC[CH+]C	C=CC	27.94	-27.94	43.06	14.96	-14.96	56.04	CC(C[CH+]C)CCC	C=CC	C8H17+	C3H6
C8H17+	H+	27.95	43.05	CC(C[CH+]C)CCC	C\C=C\C(C)CCC	[H+]	43.05	-43.05	27.95	4.44	-4.44	66.56	CC(C[CH+]C)CCC	[H+]	C8H17+	H+
C8H17+	H+	31.55	39.45	CC(C[CH+]C)CCC	CC(CC=C)CCC	[H+]	39.45	-39.45	31.55	1.71	-1.71	69.29	CC(C[CH+]C)CCC	[H+]	C8H17+	H+
C8H15+	CH3+	41.74	29.26	CC[C+]1CC1CCC	C=C1CC1CCC	[CH3+]	29.26	-29.26	41.74	7.34	-7.34	63.66	CC[C+]1CC1CCC	[CH3+]	C8H15+	CH3+
C8H15+	CH3+	37.53	33.47	CC[C+]1CC1CCC	C=C1CC1CCC	[CH3+]	33.47	-33.47	37.53	11.55	-11.55	59.45	CC[C+]1CC1CCC	[CH3+]	C8H15+	CH3+
C8H15+	C3H7+	31.66	39.34	CC[C+]1CC1CCC	CCC1=CC1	[CH2+]CC	39.34	-39.34	31.66	7.17	-7.17	63.83	CC[C+]1CC1CCC	[CH2+]CC	C8H15+	C3H7+
C8H15+	C3H7+	25.42	45.58	CC[C+]1CC1CCC	CCC1=CC1	[CH2+]CC	45.58	-45.58	25.42	13.41	-13.41	57.59	CC[C+]1CC1CCC	[CH2+]CC	C8H15+	C3H7+
C8H15+	H+	34.77	36.23	CC[C+]1CC1CCC	C\C=C1\CC1CCC	[H+]	36.23	-36.23	34.77	0.65	-0.65	70.35	CC[C+]1CC1CCC	[H+]	C8H15+	H+
C8H15+	H+	30.74	40.26	CC[C+]1CC1CCC	C\C=C1\CC1CCC	[H+]	40.26	-40.26	30.74	4.68	-4.68	66.32	CC[C+]1CC1CCC	[H+]	C8H15+	H+
C8H15+	CH3+	41.56	29.44	CC[CH+]C1C(C)C1C	CC1C(C)C1C=C	[CH3+]	29.44	-29.44	41.56	7.08	-7.08	63.92	CC[CH+]C1C(C)C1C	[CH3+]	C8H15+	CH3+
C8H15+	CH3+	39.21	31.79	CC[CH+]C1C(C)C1C	CC1C(C)C1C=C	[CH3+]	31.79	-31.79	39.21	9.43	-9.43	61.57	CC[CH+]C1C(C)C1C	[CH3+]	C8H15+	CH3+
C8H15+	H+	31.15	39.85	CC[CH+]C1C(C)C1C	CC1C(C)C1\C=C\C	[H+]	39.85	-39.85	31.15	2.74	-2.74	68.26	CC[CH+]C1C(C)C1C	[H+]	C8H15+	H+
C8H15+	CH3+	40.99	30.01	CC[CH+]C1CC1(C)C	C=CC1CC1(C)C	[CH3+]	30.01	-30.01	40.99	7.13	-7.13	63.87	CC[CH+]C1CC1(C)C	[CH3+]	C8H15+	CH3+
C8H15+	CH3+	38.28	32.72	CC[CH+]C1CC1(C)C	C=CC1CC1(C)C	[CH3+]	32.72	-32.72	38.28	9.84	-9.84	61.16	CC[CH+]C1CC1(C)C	[CH3+]	C8H15+	CH3+
C8H15+	CH3+	41.58	29.42	CC[CH+]C1CC1CC	C=CC1CC1CC	[CH3+]	29.42	-29.42	41.58	7.15	-7.15	63.85	CC[CH+]C1CC1CC	[CH3+]	C8H15+	CH3+
C8H15+	CH3+	39.16	31.84	CC[CH+]C1CC1CC	C=CC1CC1CC	[CH3+]	31.84	-31.84	39.16	9.57	-9.57	61.43	CC[CH+]C1CC1CC	[CH3+]	C8H15+	CH3+
C8H15+	H+	31.03	39.97	CC[CH+]C1CC1CC	C\C=C\C1CC1CC	[H+]	39.97	-39.97	31.03	2.96	-2.96	68.04	CC[CH+]C1CC1CC	[H+]	C8H15+	H+
C8H15+	C3H6	40.16	30.84	CC1C(C)C1C[CH+]C	CC1[CH+]C1C	C=CC	30.84	-30.84	40.16	5.96	-5.96	65.04	CC1C(C)C1C[CH+]C	C=CC	C8H15+	C3H6
C8H15+	C3H6	34.92	36.08	CC1C(C)C1C[CH+]C	CC1[CH+]C1C	C=CC	36.08	-36.08	34.92	11.2	-11.2	59.8	CC1C(C)C1C[CH+]C	C=CC	C8H15+	C3H6
C8H15+	H+	36.77	34.23	CC1C(C)C1C[CH+]C	CC1C(C)C1\C=C\C	[H+]	34.23	-34.23	36.77	1.16	-1.16	69.84	CC1C(C)C1C[CH+]C	[H+]	C8H15+	H+
C8H15+	H+	33.28	37.72	CC1C(C)C1C[CH+]C	CC1C(C)C1\C=C\C	[H+]	37.72	-37.72	33.28	4.65	-4.65	66.35	CC1C(C)C1C[CH+]C	[H+]	C8H15+	H+
C8H15+	H+	32	39	CC1C(C)C1C[CH+]C	CC1C(C)C1CC=C	[H+]	39	-39	32	1.54	-1.54	69.46	CC1C(C)C1C[CH+]C	[H+]	C8H15+	H+
C8H15+	C2H4	46.83	24.17	CC1C(C)C1CC[CH2+]	[CH2+]C1C(C)C1C	C=C	24.17	-24.17	46.83	9.94	-9.94	61.06	CC1C(C)C1CC[CH2+]	C=C	C8H15+	C2H4
C8H15+	C2H4	40.33	30.67	CC1C(C)C1CC[CH2+]	[CH2+]C1C(C)C1C	C=C	30.67	-30.67	40.33	16.44	-16.44	54.56	CC1C(C)C1CC[CH2+]	C=C	C8H15+	C2H4
C8H15+	H+	34.93	36.07	CC1C(C)C1CC[CH2+]	CC1C(C)C1CC=C	[H+]	36.07	-36.07	34.93	2.1	-2.1	68.9	CC1C(C)C1CC[CH2+]	[H+]	C8H15+	H+
C8H15+	H+	32.19	38.81	CC1C(C)C1CC[CH2+]	CC1C(C)C1CC=C	[H+]	38.81	-38.81	32.19	4.84	-4.84	66.16	CC1C(C)C1CC[CH2+]	[H+]	C8H15+	H+
C8H15+	C2H5+	43.25	27.75	CCC[C+]1C(C)C1C	C=C1C(C)C1C	[CH2+]C	27.75	-27.75	43.25	8.4	-8.4	62.6	CCC[C+]1C(C)C1C	[CH2+]C	C8H15+	C2H5+
C8H15+	C2H5+	37.11	33.89	CCC[C+]1C(C)C1C	C=C1C(C)C1C	[CH2+]C	33.89	-33.89	37.11	14.54	-14.54	56.46	CCC[C+]1C(C)C1C	[CH2+]C	C8H15+	C2H5+
C8H15+	H+	30.34	40.66	CCC[C+]1C(C)C1C	CC\C=C1/C(C)C1C	[H+]	40.66	-40.66	30.34	4.94	-4.94	66.06	CCC[C+]1C(C)C1C	[H+]	C8H15+	H+
C8H15+	CH3+	28.89	42.11	CCC[C+]1C(C)C1C	CCCC1=CC1C	[CH3+]	42.11	-42.11	28.89	5.89	-5.89	65.11	CCC[C+]1C(C)C1C	[CH3+]	C8H15+	CH3+
C8H15+	C2H5+	42.86	28.14	CCC[C+]1CC1(C)C	C=C1CC1(C)C	[CH2+]C	28.14	-28.14	42.86	8.7	-8.7	62.3	CCC[C+]1CC1(C)C	[CH2+]C	C8H15+	C2H5+
C8H15+	C2H5+	36.58	34.42	CCC[C+]1CC1(C)C	C=C1CC1(C)C	[CH2+]C	34.42	-34.42	36.58	14.98	-14.98	56.02	CCC[C+]1CC1(C)C	[CH2+]C	C8H15+	C2H5+
C8H15+	CH3+	29.93	41.07	CCC[C+]1CC1(C)C	CC=1CC=1CCC	[CH3+]	41.07	-41.07	29.93	9	-9	62	CCC[C+]1CC1(C)C	[CH3+]	C8H15+	CH3+
C8H15+	H+	30.19	40.81	CCC[C+]1CC1(C)C	CC\C=C1/CC1(C)C	[H+]	40.81	-40.81	30.19	4.87	-4.87	66.13	CCC[C+]1CC1(C)C	[H+]	C8H15+	H+
C8H15+	C2H5+	44.7	26.3	CCC[C+]1CC1CC	C=C1CC1CC	[CH2+]C	26.3	-26.3	44.7	8.37	-8.37	62.63	CCC[C+]1CC1CC	[CH2+]C	C8H15+	C2H5+
C8H15+	C2H5+	39.22	31.78	CCC[C+]1CC1CC	C=C1CC1CC	[CH2+]C	31.78	-31.78	39.22	13.85	-13.85	57.15	CCC[C+]1CC1CC	[CH2+]C	C8H15+	C2H5+
C8H15+	C2H5+	32.2	38.8	CCC[C+]1CC1CC	CCCC1=CC1	[CH2+]C	38.8	-38.8	32.2	6.6	-6.6	64.4	CCC[C+]1CC1CC	[CH2+]C	C8H15+	C2H5+
C8H15+	C2H5+	25.88	45.12	CCC[C+]1CC1CC	CCCC1=CC1	[CH2+]C	45.12	-45.12	25.88	12.92	-12.92	58.08	CCC[C+]1CC1CC	[CH2+]C	C8H15+	C2H5+
C8H15+	H+	35.82	35.18	CCC[C+]1CC1CC	CC\C=C1/CC1CC	[H+]	35.18	-35.18	35.82	0.59	-0.59	70.41	CCC[C+]1CC1CC	[H+]	C8H15+	H+
C8H15+	H+	31.43	39.57	CCC[C+]1CC1CC	CC\C=C1/CC1CC	[H+]	39.57	-39.57	31.43	4.98	-4.98	66.02	CCC[C+]1CC1CC	[H+]	C8H15+	H+
C8H15+	C3H7+	30.51	40.49	CCC1[CH+]C1CCC	CCC1C=C1	[CH2+]CC	40.49	-40.49	30.51	7.58	-7.58	63.42	CCC1[CH+]C1CCC	[CH2+]CC	C8H15+	C3H7+
C8H15+	C2H5+	29.63	41.37	CCC1[CH+]C1CCC	CCCC1C=C1	[CH2+]C	41.37	-41.37	29.63	7.71	-7.71	63.29	CCC1[CH+]C1CCC	[CH2+]C	C8H15+	C2H5+
C8H15+	C2H4	46.23	24.77	CCC1CC1CC[CH2+]	[CH2+]C1CC1CC	C=C	24.77	-24.77	46.23	10.84	-10.84	60.16	CCC1CC1CC[CH2+]	C=C	C8H15+	C2H4
C8H15+	H+	32.22	38.78	CCC1CC1CC[CH2+]	CCC1CC1CC=C	[H+]	38.78	-38.78	32.22	4.85	-4.85	66.15	CCC1CC1CC[CH2+]	[H+]	C8H15+	H+
C8H15+	CH3+	30.49	40.51	CCCC1[CH+]C1(C)C	CC1=CC1CCC	[CH3+]	40.51	-40.51	30.49	9.2	-9.2	61.8	CCCC1[CH+]C1(C)C	[CH3+]	C8H15+	CH3+
C8H15+	CH3+	28.55	42.45	CCCC1[CH+]C1(C)C	CC1=CC1CCC	[CH3+]	42.45	-42.45	28.55	11.14	-11.14	59.86	CCCC1[CH+]C1(C)C	[CH3+]	C8H15+	CH3+
C8H15+	C3H7+	30.41	40.59	CCCC1[CH+]C1(C)C	CC1(C)C=C1	[CH2+]CC	40.59	-40.59	30.41	8.14	-8.14	62.86	CCCC1[CH+]C1(C)C	[CH2+]CC	C8H15+	C3H7+
C8H15+	CH3+	31.48	39.52	CCCC1CC1([CH2+])C	C=C1CC1CCC	[CH3+]	39.52	-39.52	31.48	10.6	-10.6	60.4	CCCC1CC1([CH2+])C	[CH3+]	C8H15+	CH3+
C8H15+	CH3+	26.98	44.02	CCCC1CC1([CH2+])C	C=C1CC1CCC	[CH3+]	44.02	-44.02	26.98	15.1	-15.1	55.9	CCCC1CC1([CH2+])C	[CH3+]	C8H15+	CH3+
C8H17+	C4H9+	47.83	23.17	[CH2+]C(C)(C)C(C)(C)C	C=C(C)C	C[C+](C)C	23.17	-23.17	47.83	25.42	-25.42	45.58	[CH2+]C(C)(C)C(C)(C)C	C[C+](C)C	C8H17+	C4H9+
C8H17+	CH3+	44.01	26.99	[CH2+]C(C)(C)C(C)(C)C	C=C(C)C(C)(C)C	[CH3+]	26.99	-26.99	44.01	15.43	-15.43	55.57	[CH2+]C(C)(C)C(C)(C)C	[CH3+]	C8H17+	CH3+
C8H17+	CH3+	38.96	32.04	[CH2+]C(C)(C)C(C)(C)C	C=C(C)C(C)(C)C	[CH3+]	32.04	-32.04	38.96	20.48	-20.48	50.52	[CH2+]C(C)(C)C(C)(C)C	[CH3+]	C8H17+	CH3+
C8H17+	C4H9+	48.93	22.07	[CH2+]C(C)(C)CCCC	C=C(C)C	CCC[CH2+]	22.07	-22.07	48.93	13.9	-13.9	57.1	[CH2+]C(C)(C)CCCC	CCC[CH2+]	C8H17+	C4H9+
C8H17+	C4H9+	41.59	29.41	[CH2+]C(C)(C)CCCC	C=C(C)C	CCC[CH2+]	29.41	-29.41	41.59	21.24	-21.24	49.76	[CH2+]C(C)(C)CCCC	CCC[CH2+]	C8H17+	C4H9+
C8H17+	CH3+	45.09	25.91	[CH2+]C(C)(C)CCCC	C=C(C)CCCC	[CH3+]	25.91	-25.91	45.09	13.2	-13.2	57.8	[CH2+]C(C)(C)CCCC	[CH3+]	C8H17+	CH3+
C8H17+	CH3+	40.55	30.45	[CH2+]C(C)(C)CCCC	C=C(C)CCCC	[CH3+]	30.45	-30.45	40.55	17.74	-17.74	53.26	[CH2+]C(C)(C)CCCC	[CH3+]	C8H17+	CH3+
C8H17+	C3H7+	26.65	44.35	[CH2+]C(C)(C)CCCC	CC1(C)CC1	[CH2+]CC	44.35	-44.35	26.65	27.82	-27.82	43.18	[CH2+]C(C)(C)CCCC	[CH2+]CC	C8H17+	C3H7+
C8H17+	C3H7+	51.35	19.65	[CH2+]C(C)(CC)CCC	C=C(C)CC	[CH2+]CC	19.65	-19.65	51.35	14.06	-14.06	56.94	[CH2+]C(C)(CC)CCC	[CH2+]CC	C8H17+	C3H7+
C8H17+	C3H7+	43.7	27.3	[CH2+]C(C)(CC)CCC	C=C(C)CC	[CH2+]CC	27.3	-27.3	43.7	21.71	-21.71	49.29	[CH2+]C(C)(CC)CCC	[CH2+]CC	C8H17+	C3H7+
C8H17+	C2H5+	48.76	22.24	[CH2+]C(C)(CC)CCC	C=C(C)CCC	[CH2+]C	22.24	-22.24	48.76	15.74	-15.74	55.26	[CH2+]C(C)(CC)CCC	[CH2+]C	C8H17+	C2H5+
C8H17+	C2H5+	44.08	26.92	[CH2+]C(C)(CC)CCC	C=C(C)CCC	[CH2+]C	26.92	-26.92	44.08	20.42	-20.42	50.58	[CH2+]C(C)(CC)CCC	[CH2+]C	C8H17+	C2H5+
C8H17+	CH3+	46.99	24.01	[CH2+]C(C)(CC)CCC	C=C(CC)CCC	[CH3+]	24.01	-24.01	46.99	13.21	-13.21	57.79	[CH2+]C(C)(CC)CCC	[CH3+]	C8H17+	CH3+
C8H17+	CH3+	42.83	28.17	[CH2+]C(C)(CC)CCC	C=C(CC)CCC	[CH3+]	28.17	-28.17	42.83	17.37	-17.37	53.63	[CH2+]C(C)(CC)CCC	[CH3+]	C8H17+	CH3+
C8H17+	C2H5+	28.87	42.13	[CH2+]C(C)(CC)CCC	CC1(CC)CC1	[CH2+]C	42.13	-42.13	28.87	27.27	-27.27	43.73	[CH2+]C(C)(CC)CCC	[CH2+]C	C8H17+	C2H5+
C8H17+	CH3+	27.35	43.65	[CH2+]C(C)(CC)CCC	CC1(CCC)CC1	[CH3+]	43.65	-43.65	27.35	25.89	-25.89	45.11	[CH2+]C(C)(CC)CCC	[CH3+]	C8H17+	CH3+
C8H17+	C5H11+	53.57	17.43	[CH2+]C(C)C(C)(C)CC	C=CC	C[C+](C)CC	17.43	-17.43	53.57	15.38	-15.38	55.62	[CH2+]C(C)C(C)(C)CC	C[C+](C)CC	C8H17+	C5H11+
C8H17+	C5H11+	46.8	24.2	[CH2+]C(C)C(C)(C)CC	C=CC	C[C+](C)CC	24.2	-24.2	46.8	22.15	-22.15	48.85	[CH2+]C(C)C(C)(C)CC	C[C+](C)CC	C8H17+	C5H11+
C8H17+	CH3+	43.98	27.02	[CH2+]C(C)C(C)(C)CC	C=CC(C)(C)CC	[CH3+]	27.02	-27.02	43.98	13.35	-13.35	57.65	[CH2+]C(C)C(C)(C)CC	[CH3+]	C8H17+	CH3+
C8H17+	CH3+	39.7	31.3	[CH2+]C(C)C(C)(C)CC	C=CC(C)(C)CC	[CH3+]	31.3	-31.3	39.7	17.63	-17.63	53.37	[CH2+]C(C)C(C)(C)CC	[CH3+]	C8H17+	CH3+
C8H17+	H+	23.51	47.49	[CH2+]C(C)C(C)(C)CC	CC1CCCC1(C)C	[H+]	47.49	-47.49	23.51	31	-31	40	[CH2+]C(C)C(C)(C)CC	[H+]	C8H17+	H+
C8H17+	H+	37.03	33.97	[CH2+]C(C)C(C)(C)CC	C=C(C)C(C)(C)CC	[H+]	33.97	-33.97	37.03	3.29	-3.29	67.71	[CH2+]C(C)C(C)(C)CC	[H+]	C8H17+	H+
C8H17+	H+	32.4	38.6	[CH2+]C(C)C(C)(C)CC	C=C(C)C(C)(C)CC	[H+]	38.6	-38.6	32.4	7.92	-7.92	63.08	[CH2+]C(C)C(C)(C)CC	[H+]	C8H17+	H+
C8H17+	C5H11+	45.74	25.26	[CH2+]C(C)CC(C)(C)C	C=CC	[CH2+]C(C)(C)C	25.26	-25.26	45.74	13.1	-13.1	57.9	[CH2+]C(C)CC(C)(C)C	[CH2+]C(C)(C)C	C8H17+	C5H11+
C8H17+	C5H11+	41.04	29.96	[CH2+]C(C)CC(C)(C)C	C=CC	[CH2+]C(C)(C)C	29.96	-29.96	41.04	17.8	-17.8	53.2	[CH2+]C(C)CC(C)(C)C	[CH2+]C(C)(C)C	C8H17+	C5H11+
C8H17+	C4H9+	27.77	43.23	[CH2+]C(C)CC(C)(C)C	CC1CC1	C[C+](C)C	43.23	-43.23	27.77	30.53	-30.53	40.47	[CH2+]C(C)CC(C)(C)C	C[C+](C)C	C8H17+	C4H9+
C8H17+	CH3+	44.65	26.35	[CH2+]C(C)CC(C)(C)C	CC(C)(C)CC=C	[CH3+]	26.35	-26.35	44.65	10.71	-10.71	60.29	[CH2+]C(C)CC(C)(C)C	[CH3+]	C8H17+	CH3+
C8H17+	CH3+	40.69	30.31	[CH2+]C(C)CC(C)(C)C	CC(C)(C)CC=C	[CH3+]	30.31	-30.31	40.69	14.67	-14.67	56.33	[CH2+]C(C)CC(C)(C)C	[CH3+]	C8H17+	CH3+
C8H17+	H+	28.94	42.06	[CH2+]C(C)CC(C)(C)C	C=C(C)CC(C)(C)C	[H+]	42.06	-42.06	28.94	10.9	-10.9	60.1	[CH2+]C(C)CC(C)(C)C	[H+]	C8H17+	H+
C8H17+	C5H11+	44.58	26.42	[CH2+]C(C)CC(C)CC	C=CC	[CH2+]C(C)CC	26.42	-26.42	44.58	12.57	-12.57	58.43	[CH2+]C(C)CC(C)CC	[CH2+]C(C)CC	C8H17+	C5H11+
C8H17+	C5H11+	40.49	30.51	[CH2+]C(C)CC(C)CC	C=CC	[CH2+]C(C)CC	30.51	-30.51	40.49	16.66	-16.66	54.34	[CH2+]C(C)CC(C)CC	[CH2+]C(C)CC	C8H17+	C5H11+
C8H17+	C4H9+	23.97	47.03	[CH2+]C(C)CC(C)CC	CC1CC1	C[CH+]CC	47.03	-47.03	23.97	29.85	-29.85	41.15	[CH2+]C(C)CC(C)CC	C[CH+]CC	C8H17+	C4H9+
C8H17+	CH3+	39.29	31.71	[CH2+]C(C)CC(C)CC	CC(CC)CC=C	[CH3+]	31.71	-31.71	39.29	14.02	-14.02	56.98	[CH2+]C(C)CC(C)CC	[CH3+]	C8H17+	CH3+
C8H17+	H+	30.73	40.27	[CH2+]C(C)CC(C)CC	C=C(C)CC(C)CC	[H+]	40.27	-40.27	30.73	8.25	-8.25	62.75	[CH2+]C(C)CC(C)CC	[H+]	C8H17+	H+
C8H17+	C5H11+	45.92	25.08	[CH2+]C(C)CCC(C)C	C=CC	CC(C)C[CH2+]	25.08	-25.08	45.92	11.6	-11.6	59.4	[CH2+]C(C)CCC(C)C	CC(C)C[CH2+]	C8H17+	C5H11+
C8H17+	C5H11+	40.25	30.75	[CH2+]C(C)CCC(C)C	C=CC	CC(C)C[CH2+]	30.75	-30.75	40.25	17.27	-17.27	53.73	[CH2+]C(C)CCC(C)C	CC(C)C[CH2+]	C8H17+	C5H11+
C8H17+	CH3+	43.17	27.83	[CH2+]C(C)CCC(C)C	CC(C)CCC=C	[CH3+]	27.83	-27.83	43.17	9.98	-9.98	61.02	[CH2+]C(C)CCC(C)C	[CH3+]	C8H17+	CH3+
C8H17+	CH3+	38.95	32.05	[CH2+]C(C)CCC(C)C	CC(C)CCC=C	[CH3+]	32.05	-32.05	38.95	14.2	-14.2	56.8	[CH2+]C(C)CCC(C)C	[CH3+]	C8H17+	CH3+
C8H17+	H+	30.94	40.06	[CH2+]C(C)CCC(C)C	C=C(C)CCC(C)C	[H+]	40.06	-40.06	30.94	7.99	-7.99	63.01	[CH2+]C(C)CCC(C)C	[H+]	C8H17+	H+
C8H17+	C4H9+	53.84	17.16	[CH2+]C(CC)C(C)(C)C	C=CCC	C[C+](C)C	17.16	-17.16	53.84	14.99	-14.99	56.01	[CH2+]C(CC)C(C)(C)C	C[C+](C)C	C8H17+	C4H9+
C8H17+	C4H9+	46.92	24.08	[CH2+]C(CC)C(C)(C)C	C=CCC	C[C+](C)C	24.08	-24.08	46.92	21.91	-21.91	49.09	[CH2+]C(CC)C(C)(C)C	C[C+](C)C	C8H17+	C4H9+
C8H17+	C2H5+	47.21	23.79	[CH2+]C(CC)C(C)(C)C	C=CC(C)(C)C	[CH2+]C	23.79	-23.79	47.21	15.08	-15.08	55.92	[CH2+]C(CC)C(C)(C)C	[CH2+]C	C8H17+	C2H5+
C8H17+	C2H5+	48.24	22.76	[CH2+]C(CC)C(C)(C)C	C=CC(C)(C)C	[CH2+]C	22.76	-22.76	48.24	14.05	-14.05	56.95	[CH2+]C(CC)C(C)(C)C	[CH2+]C	C8H17+	C2H5+
C8H17+	C2H5+	42.11	28.89	[CH2+]C(CC)C(C)(C)C	C=CC(C)(C)C	[CH2+]C	28.89	-28.89	42.11	20.18	-20.18	50.82	[CH2+]C(CC)C(C)(C)C	[CH2+]C	C8H17+	C2H5+
C8H17+	CH3+	23.22	47.78	[CH2+]C(CC)C(C)(C)C	CC(C)(C)C1CC1	[CH3+]	47.78	-47.78	23.22	28.25	-28.25	42.75	[CH2+]C(CC)C(C)(C)C	[CH3+]	C8H17+	CH3+
C8H17+	H+	32.49	38.51	[CH2+]C(CC)C(C)(C)C	C=C(CC)C(C)(C)C	[H+]	38.51	-38.51	32.49	7.08	-7.08	63.92	[CH2+]C(CC)C(C)(C)C	[H+]	C8H17+	H+
C8H17+	C3H7+	51.94	19.06	[CH2+]C(CCC)C(C)C	CCCC=C	C[CH+]C	19.06	-19.06	51.94	12.82	-12.82	58.18	[CH2+]C(CCC)C(C)C	C[CH+]C	C8H17+	C3H7+
C8H17+	C3H7+	45.84	25.16	[CH2+]C(CCC)C(C)C	CCCC=C	C[CH+]C	25.16	-25.16	45.84	18.92	-18.92	52.08	[CH2+]C(CCC)C(C)C	C[CH+]C	C8H17+	C3H7+
C8H17+	C3H7+	48.57	22.43	[CH2+]C(CCC)C(C)C	C=CC(C)C	[CH2+]CC	22.43	-22.43	48.57	13.55	-13.55	57.45	[CH2+]C(CCC)C(C)C	[CH2+]CC	C8H17+	C3H7+
C8H17+	C3H7+	42.04	28.96	[CH2+]C(CCC)C(C)C	C=CC(C)C	[CH2+]CC	28.96	-28.96	42.04	20.08	-20.08	50.92	[CH2+]C(CCC)C(C)C	[CH2+]CC	C8H17+	C3H7+
C8H17+	C2H5+	25.67	45.33	[CH2+]C(CCC)C(C)C	CC(C)C1CC1	[CH2+]C	45.33	-45.33	25.67	27.47	-27.47	43.53	[CH2+]C(CCC)C(C)C	[CH2+]C	C8H17+	C2H5+
C8H17+	H+	31.7	39.3	[CH2+]C(CCC)C(C)C	C=C(CCC)C(C)C	[H+]	39.3	-39.3	31.7	9.94	-9.94	61.06	[CH2+]C(CCC)C(C)C	[H+]	C8H17+	H+
C8H17+	C3H7+	48.94	22.06	[CH2+]C(CCC)CCC	CCCC=C	[CH2+]CC	22.06	-22.06	48.94	11.03	-11.03	59.97	[CH2+]C(CCC)CCC	[CH2+]CC	C8H17+	C3H7+
C8H17+	C3H7+	42.8	28.2	[CH2+]C(CCC)CCC	CCCC=C	[CH2+]CC	28.2	-28.2	42.8	17.17	-17.17	53.83	[CH2+]C(CCC)CCC	[CH2+]CC	C8H17+	C3H7+
C8H17+	C2H5+	25.51	45.49	[CH2+]C(CCC)CCC	CCCC1CC1	[CH2+]C	45.49	-45.49	25.51	27.67	-27.67	43.33	[CH2+]C(CCC)CCC	[CH2+]C	C8H17+	C2H5+
C8H17+	H+	31.44	39.56	[CH2+]C(CCC)CCC	C=C(CCC)CCC	[H+]	39.56	-39.56	31.44	8.8	-8.8	62.2	[CH2+]C(CCC)CCC	[H+]	C8H17+	H+
C8H15+	H+	33.94	37.06	[CH2+]C1CCCC(C)C1	C=C1CC(C)CCC1	[H+]	37.06	-37.06	33.94	8.05	-8.05	62.95	[CH2+]C1CCCC(C)C1	[H+]	C8H15+	H+
C8H15+	H+	32.44	38.56	[CH2+]C1CCCCC1C	C=C1CCCCC1C	[H+]	38.56	-38.56	32.44	7.92	-7.92	63.08	[CH2+]C1CCCCC1C	[H+]	C8H15+	H+
C3H7+	CH3+	41.77	29.23	[CH2+]CC	C=C	[CH3+]	29.23	-29.23	41.77	7.87	-7.87	63.13	[CH2+]CC	[CH3+]	C3H7+	CH3+
C3H7+	CH3+	38.53	32.47	[CH2+]CC	C=C	[CH3+]	32.47	-32.47	38.53	11.11	-11.11	59.89	[CH2+]CC	[CH3+]	C3H7+	CH3+
C3H7+	H+	31.73	39.27	[CH2+]CC	C=CC	[H+]	39.27	-39.27	31.73	5.02	-5.02	65.98	[CH2+]CC	[H+]	C3H7+	H+
C8H17+	C2H5+	45.28	25.72	C[C+](C)C(C)(C)CC	C/C(C)=C(\C)C	[CH2+]C	25.72	-25.72	45.28	12.87	-12.87	58.13	C[C+](C)C(C)(C)CC	[CH2+]C	C8H17+	C2H5+
C8H17+	C2H5+	39.86	31.14	C[C+](C)C(C)(C)CC	C/C(C)=C(\C)C	[CH2+]C	31.14	-31.14	39.86	18.29	-18.29	52.71	C[C+](C)C(C)(C)CC	[CH2+]C	C8H17+	C2H5+
C8H17+	CH3+	43.59	27.41	C[C+](C)C(C)(C)CC	C/C(C)=C(/C)CC	[CH3+]	27.41	-27.41	43.59	10.62	-10.62	60.38	C[C+](C)C(C)(C)CC	[CH3+]	C8H17+	CH3+
C8H17+	CH3+	39.25	31.75	C[C+](C)C(C)(C)CC	C/C(C)=C(/C)CC	[CH3+]	31.75	-31.75	39.25	14.96	-14.96	56.04	C[C+](C)C(C)(C)CC	[CH3+]	C8H17+	CH3+
C8H17+	H+	33.16	37.84	C[C+](C)C(C)(C)CC	C=C(C)C(C)(C)CC	[H+]	37.84	-37.84	33.16	-0.21	0.21	71.21	C[C+](C)C(C)(C)CC	[H+]	C8H17+	H+
C8H17+	H+	31.42	39.58	C[C+](C)C(C)(C)CC	C=C(C)C(C)(C)CC	[H+]	39.58	-39.58	31.42	1.53	-1.53	69.47	C[C+](C)C(C)(C)CC	[H+]	C8H17+	H+
C8H17+	C4H9+	50.59	20.41	C[C+](C)CC(C)(C)C	C=C(C)C	C[C+](C)C	20.41	-20.41	50.59	10.1	-10.1	60.9	C[C+](C)CC(C)(C)C	C[C+](C)C	C8H17+	C4H9+
C8H17+	C4H9+	45.46	25.54	C[C+](C)CC(C)(C)C	C=C(C)C	C[C+](C)C	25.54	-25.54	45.46	15.23	-15.23	55.77	C[C+](C)CC(C)(C)C	C[C+](C)C	C8H17+	C4H9+
C8H17+	H+	31.3	39.7	C[C+](C)CC(C)(C)C	C=C(C)CC(C)(C)C	[H+]	39.7	-39.7	31.3	-0.03	0.03	71.03	C[C+](C)CC(C)(C)C	[H+]	C8H17+	H+
C8H17+	H+	30.06	40.94	C[C+](C)CC(C)(C)C	C\C(C)=C/C(C)(C)C	[H+]	40.94	-40.94	30.06	0.49	-0.49	70.51	C[C+](C)CC(C)(C)C	[H+]	C8H17+	H+
C8H17+	H+	28.14	42.86	C[C+](C)CC(C)(C)C	C\C(C)=C/C(C)(C)C	[H+]	42.86	-42.86	28.14	2.41	-2.41	68.59	C[C+](C)CC(C)(C)C	[H+]	C8H17+	H+
C8H17+	C4H9+	47.5	23.5	C[C+](C)CC(C)CC	C=C(C)C	C[CH+]CC	23.5	-23.5	47.5	10.1	-10.1	60.9	C[C+](C)CC(C)CC	C[CH+]CC	C8H17+	C4H9+
C8H17+	C4H9+	42.76	28.24	C[C+](C)CC(C)CC	C=C(C)C	C[CH+]CC	28.24	-28.24	42.76	14.84	-14.84	56.16	C[C+](C)CC(C)CC	C[CH+]CC	C8H17+	C4H9+
C8H17+	H+	31.24	39.76	C[C+](C)CC(C)CC	C\C(C)=C/C(C)CC	[H+]	39.76	-39.76	31.24	4.63	-4.63	66.37	C[C+](C)CC(C)CC	[H+]	C8H17+	H+
C8H17+	H+	32.49	38.51	C[C+](C)CC(C)CC	C=C(C)CC(C)CC	[H+]	38.51	-38.51	32.49	-2.6	2.6	73.6	C[C+](C)CC(C)CC	[H+]	C8H17+	H+
C8H17+	H+	30.08	40.92	C[C+](C)CC(C)CC	C=C(C)CC(C)CC	[H+]	40.92	-40.92	30.08	-0.19	0.19	71.19	C[C+](C)CC(C)CC	[H+]	C8H17+	H+
C8H17+	CH3+	42.87	28.13	C[C+](CC)C(C)(C)C	C/C(C)=C(/C)CC	[CH3+]	28.13	-28.13	42.87	11.49	-11.49	59.51	C[C+](CC)C(C)(C)C	[CH3+]	C8H17+	CH3+
C8H17+	CH3+	39.24	31.76	C[C+](CC)C(C)(C)C	C/C(C)=C(/C)CC	[CH3+]	31.76	-31.76	39.24	15.12	-15.12	55.88	C[C+](CC)C(C)(C)C	[CH3+]	C8H17+	CH3+
C8H17+	CH3+	43.27	27.73	C[C+](CC)C(C)(C)C	C=C(C)C(C)(C)C	[CH3+]	27.73	-27.73	43.27	7.8	-7.8	63.2	C[C+](CC)C(C)(C)C	[CH3+]	C8H17+	CH3+
C8H17+	CH3+	39.96	31.04	C[C+](CC)C(C)(C)C	C=C(C)C(C)(C)C	[CH3+]	31.04	-31.04	39.96	11.11	-11.11	59.89	C[C+](CC)C(C)(C)C	[CH3+]	C8H17+	CH3+
C8H17+	H+	31.96	39.04	C[C+](CC)C(C)(C)C	C\C=C(/C)C(C)(C)C	[H+]	39.04	-39.04	31.96	3.22	-3.22	67.78	C[C+](CC)C(C)(C)C	[H+]	C8H17+	H+
C8H17+	H+	29.81	41.19	C[C+](CC)C(C)(C)C	C=C(CC)C(C)(C)C	[H+]	41.19	-41.19	29.81	1.3	-1.3	69.7	C[C+](CC)C(C)(C)C	[H+]	C8H17+	H+
C8H17+	C2H5+	44.83	26.17	C[C+](CC)C(C)CC	C\C=C(/C)CC	[CH2+]C	26.17	-26.17	44.83	10.68	-10.68	60.32	C[C+](CC)C(C)CC	[CH2+]C	C8H17+	C2H5+
C8H17+	C2H5+	39.72	31.28	C[C+](CC)C(C)CC	C\C=C(/C)CC	[CH2+]C	31.28	-31.28	39.72	15.79	-15.79	55.21	C[C+](CC)C(C)CC	[CH2+]C	C8H17+	C2H5+
C8H17+	CH3+	42.69	28.31	C[C+](CC)C(C)CC	CC\C=C(/C)CC	[CH3+]	28.31	-28.31	42.69	9.68	-9.68	61.32	C[C+](CC)C(C)CC	[CH3+]	C8H17+	CH3+
C8H17+	CH3+	38.82	32.18	C[C+](CC)C(C)CC	CC\C=C(/C)CC	[CH3+]	32.18	-32.18	38.82	13.55	-13.55	57.45	C[C+](CC)C(C)CC	[CH3+]	C8H17+	CH3+
C8H17+	CH3+	42.95	28.05	C[C+](CC)C(C)CC	C=C(C)C(C)CC	[CH3+]	28.05	-28.05	42.95	7.55	-7.55	63.45	C[C+](CC)C(C)CC	[CH3+]	C8H17+	CH3+
C8H17+	CH3+	39.72	31.28	C[C+](CC)C(C)CC	C=C(C)C(C)CC	[CH3+]	31.28	-31.28	39.72	10.78	-10.78	60.22	C[C+](CC)C(C)CC	[CH3+]	C8H17+	CH3+
C8H17+	H+	34.21	36.79	C[C+](CC)C(C)CC	C\C=C(/C)C(C)CC	[H+]	36.79	-36.79	34.21	0.52	-0.52	70.48	C[C+](CC)C(C)CC	[H+]	C8H17+	H+
C8H17+	H+	32.13	38.87	C[C+](CC)C(C)CC	C\C=C(/C)C(C)CC	[H+]	38.87	-38.87	32.13	2.6	-2.6	68.4	C[C+](CC)C(C)CC	[H+]	C8H17+	H+
C8H17+	H+	32.6	38.4	C[C+](CC)C(C)CC	C/C(CC)=C(/C)CC	[H+]	38.4	-38.4	32.6	2.05	-2.05	68.95	C[C+](CC)C(C)CC	[H+]	C8H17+	H+
C8H17+	H+	26.99	44.01	C[C+](CC)C(C)CC	C/C(CC)=C(/C)CC	[H+]	44.01	-44.01	26.99	7.66	-7.66	63.34	C[C+](CC)C(C)CC	[H+]	C8H17+	H+
C8H17+	H+	30.84	40.16	C[C+](CC)C(C)CC	C=C(CC)C(C)CC	[H+]	40.16	-40.16	30.84	0.98	-0.98	70.02	C[C+](CC)C(C)CC	[H+]	C8H17+	H+
C8H17+	C3H7+	46.81	24.19	C[C+](CC)CC(C)C	C=C(C)CC	C[CH+]C	24.19	-24.19	46.81	9.85	-9.85	61.15	C[C+](CC)CC(C)C	C[CH+]C	C8H17+	C3H7+
C8H17+	C3H7+	42.84	28.16	C[C+](CC)CC(C)C	C=C(C)CC	C[CH+]C	28.16	-28.16	42.84	13.82	-13.82	57.18	C[C+](CC)CC(C)C	C[CH+]C	C8H17+	C3H7+
C8H17+	CH3+	41.29	29.71	C[C+](CC)CC(C)C	C=C(C)CC(C)C	[CH3+]	29.71	-29.71	41.29	7.91	-7.91	63.09	C[C+](CC)CC(C)C	[CH3+]	C8H17+	CH3+
C8H17+	CH3+	38.49	32.51	C[C+](CC)CC(C)C	C=C(C)CC(C)C	[CH3+]	32.51	-32.51	38.49	10.71	-10.71	60.29	C[C+](CC)CC(C)C	[CH3+]	C8H17+	CH3+
C8H17+	H+	30.13	40.87	C[C+](CC)CC(C)C	C\C(CC)=C/C(C)C	[H+]	40.87	-40.87	30.13	5.11	-5.11	65.89	C[C+](CC)CC(C)C	[H+]	C8H17+	H+
C8H17+	H+	30.9	40.1	C[C+](CC)CC(C)C	C\C=C(/C)CC(C)C	[H+]	40.1	-40.1	30.9	3.07	-3.07	67.93	C[C+](CC)CC(C)C	[H+]	C8H17+	H+
C8H17+	H+	31.72	39.28	C[C+](CC)CC(C)C	C=C(CC)CC(C)C	[H+]	39.28	-39.28	31.72	-0.14	0.14	71.14	C[C+](CC)CC(C)C	[H+]	C8H17+	H+
C8H17+	C2H5+	45.36	25.64	C[C+](CCC)C(C)C	C=C(C)C(C)C	[CH2+]C	25.64	-25.64	45.36	8.48	-8.48	62.52	C[C+](CCC)C(C)C	[CH2+]C	C8H17+	C2H5+
C8H17+	C2H5+	40.38	30.62	C[C+](CCC)C(C)C	C=C(C)C(C)C	[CH2+]C	30.62	-30.62	40.38	13.46	-13.46	57.54	C[C+](CCC)C(C)C	[CH2+]C	C8H17+	C2H5+
C8H17+	CH3+	43.22	27.78	C[C+](CCC)C(C)C	C\C=C(/C)CCC	[CH3+]	27.78	-27.78	43.22	9.63	-9.63	61.37	C[C+](CCC)C(C)C	[CH3+]	C8H17+	CH3+
C8H17+	CH3+	41.82	29.18	C[C+](CCC)C(C)C	C\C=C(/C)CCC	[CH3+]	29.18	-29.18	41.82	11.03	-11.03	59.97	C[C+](CCC)C(C)C	[CH3+]	C8H17+	CH3+
C8H17+	CH3+	38.79	32.21	C[C+](CCC)C(C)C	C\C=C(/C)CCC	[CH3+]	32.21	-32.21	38.79	14.06	-14.06	56.94	C[C+](CCC)C(C)C	[CH3+]	C8H17+	CH3+
C8H17+	H+	29.82	41.18	C[C+](CCC)C(C)C	CC\C=C(/C)C(C)C	[H+]	41.18	-41.18	29.82	5.6	-5.6	65.4	C[C+](CCC)C(C)C	[H+]	C8H17+	H+
C8H17+	H+	33.65	37.35	C[C+](CCC)C(C)C	C/C(C)=C(/C)CCC	[H+]	37.35	-37.35	33.65	1.39	-1.39	69.61	C[C+](CCC)C(C)C	[H+]	C8H17+	H+
C8H17+	H+	29.64	41.36	C[C+](CCC)C(C)C	C/C(C)=C(/C)CCC	[H+]	41.36	-41.36	29.64	5.4	-5.4	65.6	C[C+](CCC)C(C)C	[H+]	C8H17+	H+
C8H17+	H+	31.51	39.49	C[C+](CCC)C(C)C	C=C(CCC)C(C)C	[H+]	39.49	-39.49	31.51	-0.12	0.12	71.12	C[C+](CCC)C(C)C	[H+]	C8H17+	H+
C8H17+	C2H5+	43.97	27.03	C[C+](CCC)CCC	C=C(C)CCC	[CH2+]C	27.03	-27.03	43.97	8.64	-8.64	62.36	C[C+](CCC)CCC	[CH2+]C	C8H17+	C2H5+
C8H17+	C2H5+	42.93	28.07	C[C+](CCC)CCC	C=C(C)CCC	[CH2+]C	28.07	-28.07	42.93	9.68	-9.68	61.32	C[C+](CCC)CCC	[CH2+]C	C8H17+	C2H5+
C8H17+	C2H5+	39.67	31.33	C[C+](CCC)CCC	C=C(C)CCC	[CH2+]C	31.33	-31.33	39.67	12.94	-12.94	58.06	C[C+](CCC)CCC	[CH2+]C	C8H17+	C2H5+
C8H17+	H+	33.4	37.6	C[C+](CCC)CCC	CC\C=C(/C)CCC	[H+]	37.6	-37.6	33.4	0.92	-0.92	70.08	C[C+](CCC)CCC	[H+]	C8H17+	H+
C8H17+	H+	28.03	42.97	C[C+](CCC)CCC	CC\C=C(/C)CCC	[H+]	42.97	-42.97	28.03	6.29	-6.29	64.71	C[C+](CCC)CCC	[H+]	C8H17+	H+
C8H17+	H+	31.25	39.75	C[C+](CCC)CCC	C=C(CCC)CCC	[H+]	39.75	-39.75	31.25	0.72	-0.72	70.28	C[C+](CCC)CCC	[H+]	C8H17+	H+
C8H15+	H+	34.74	36.26	C[C+]1CC(C)CCC1	CC=1CC(C)CCC=1	[H+]	36.26	-36.26	34.74	0.74	-0.74	70.26	C[C+]1CC(C)CCC1	[H+]	C8H15+	H+
C8H15+	H+	31.04	39.96	C[C+]1CC(C)CCC1	CC=1CC(C)CCC=1	[H+]	39.96	-39.96	31.04	4.44	-4.44	66.56	C[C+]1CC(C)CCC1	[H+]	C8H15+	H+
C8H15+	H+	34.87	36.13	C[C+]1CC(C)CCC1	CC1=CC(C)CCC1	[H+]	36.13	-36.13	34.87	0.13	-0.13	70.87	C[C+]1CC(C)CCC1	[H+]	C8H15+	H+
C8H15+	H+	31.67	39.33	C[C+]1CC(C)CCC1	CC1=CC(C)CCC1	[H+]	39.33	-39.33	31.67	3.33	-3.33	67.67	C[C+]1CC(C)CCC1	[H+]	C8H15+	H+
C8H15+	H+	32.78	38.22	C[C+]1CC(C)CCC1	C=C1CC(C)CCC1	[H+]	38.22	-38.22	32.78	-0.36	0.36	71.36	C[C+]1CC(C)CCC1	[H+]	C8H15+	H+
C8H15+	H+	31.32	39.68	C[C+]1CC(C)CCC1	C=C1CC(C)CCC1	[H+]	39.68	-39.68	31.32	1.1	-1.1	69.9	C[C+]1CC(C)CCC1	[H+]	C8H15+	H+
C8H15+	CH3+	41.72	29.28	C[C+]1CCCCC1C	CC=1CCCCC=1	[CH3+]	29.28	-29.28	41.72	10.93	-10.93	60.07	C[C+]1CCCCC1C	[CH3+]	C8H15+	CH3+
C8H15+	CH3+	37.31	33.69	C[C+]1CCCCC1C	CC=1CCCCC=1	[CH3+]	33.69	-33.69	37.31	15.34	-15.34	55.66	C[C+]1CCCCC1C	[CH3+]	C8H15+	CH3+
C8H15+	H+	36.32	34.68	C[C+]1CCCCC1C	CC=1CCCCC=1C	[H+]	34.68	-34.68	36.32	0.7	-0.7	70.3	C[C+]1CCCCC1C	[H+]	C8H15+	H+
C8H15+	H+	30.25	40.75	C[C+]1CCCCC1C	CC=1CCCCC=1C	[H+]	40.75	-40.75	30.25	6.77	-6.77	64.23	C[C+]1CCCCC1C	[H+]	C8H15+	H+
C8H15+	H+	35.44	35.56	C[C+]1CCCCC1C	CC1=CCCCC1C	[H+]	35.56	-35.56	35.44	-0.19	0.19	71.19	C[C+]1CCCCC1C	[H+]	C8H15+	H+
C8H15+	H+	32.57	38.43	C[C+]1CCCCC1C	C=C1CCCCC1C	[H+]	38.43	-38.43	32.57	0.45	-0.45	70.55	C[C+]1CCCCC1C	[H+]	C8H15+	H+
C8H15+	H+	31.53	39.47	C[C+]1CCCCC1C	C=C1CCCCC1C	[H+]	39.47	-39.47	31.53	1.49	-1.49	69.51	C[C+]1CCCCC1C	[H+]	C8H15+	H+
C8H17+	C4H9+	52.44	18.56	C[CH+]C(C)C(C)(C)C	C\C=C/C	C[C+](C)C	18.56	-18.56	52.44	13.71	-13.71	57.29	C[CH+]C(C)C(C)(C)C	C[C+](C)C	C8H17+	C4H9+
C8H17+	C4H9+	46.06	24.94	C[CH+]C(C)C(C)(C)C	C\C=C/C	C[C+](C)C	24.94	-24.94	46.06	20.09	-20.09	50.91	C[CH+]C(C)C(C)(C)C	C[C+](C)C	C8H17+	C4H9+
C8H17+	CH3+	40.45	30.55	C[CH+]C(C)C(C)(C)C	C\C=C\C(C)(C)C	[CH3+]	30.55	-30.55	40.45	16.83	-16.83	54.17	C[CH+]C(C)C(C)(C)C	[CH3+]	C8H17+	CH3+
C8H17+	CH3+	44.66	26.34	C[CH+]C(C)C(C)(C)C	C\C=C\C(C)(C)C	[CH3+]	26.34	-26.34	44.66	12.62	-12.62	58.38	C[CH+]C(C)C(C)(C)C	[CH3+]	C8H17+	CH3+
C8H17+	H+	35.71	35.29	C[CH+]C(C)C(C)(C)C	C\C=C(/C)C(C)(C)C	[H+]	35.29	-35.29	35.71	2.54	-2.54	68.46	C[CH+]C(C)C(C)(C)C	[H+]	C8H17+	H+
C8H17+	H+	31.18	39.82	C[CH+]C(C)C(C)(C)C	C\C=C(/C)C(C)(C)C	[H+]	39.82	-39.82	31.18	7.07	-7.07	63.93	C[CH+]C(C)C(C)(C)C	[H+]	C8H17+	H+
C8H17+	H+	31.35	39.65	C[CH+]C(C)C(C)(C)C	C=CC(C)C(C)(C)C	[H+]	39.65	-39.65	31.35	2	-2	69	C[CH+]C(C)C(C)(C)C	[H+]	C8H17+	H+
C8H17+	C4H9+	50.59	20.41	C[CH+]C(C)C(C)CC	C\C=C/C	C[CH+]CC	20.41	-20.41	50.59	13.04	-13.04	57.96	C[CH+]C(C)C(C)CC	C[CH+]CC	C8H17+	C4H9+
C8H17+	C4H9+	49.5	21.5	C[CH+]C(C)C(C)CC	C\C=C/C	C[CH+]CC	21.5	-21.5	49.5	14.13	-14.13	56.87	C[CH+]C(C)C(C)CC	C[CH+]CC	C8H17+	C4H9+
C8H17+	C4H9+	45.3	25.7	C[CH+]C(C)C(C)CC	C\C=C/C	C[CH+]CC	25.7	-25.7	45.3	18.33	-18.33	52.67	C[CH+]C(C)C(C)CC	C[CH+]CC	C8H17+	C4H9+
C8H17+	CH3+	44.2	26.8	C[CH+]C(C)C(C)CC	C\C=C\C(C)CC	[CH3+]	26.8	-26.8	44.2	12.36	-12.36	58.64	C[CH+]C(C)C(C)CC	[CH3+]	C8H17+	CH3+
C8H17+	CH3+	41.73	29.27	C[CH+]C(C)C(C)CC	C\C=C\C(C)CC	[CH3+]	29.27	-29.27	41.73	14.83	-14.83	56.17	C[CH+]C(C)C(C)CC	[CH3+]	C8H17+	CH3+
C8H17+	H+	38.66	32.34	C[CH+]C(C)C(C)CC	C\C=C(/C)C(C)CC	[H+]	32.34	-32.34	38.66	2.57	-2.57	68.43	C[CH+]C(C)C(C)CC	[H+]	C8H17+	H+
C8H17+	H+	32.96	38.04	C[CH+]C(C)C(C)CC	C\C=C(/C)C(C)CC	[H+]	38.04	-38.04	32.96	8.27	-8.27	62.73	C[CH+]C(C)C(C)CC	[H+]	C8H17+	H+
C8H17+	H+	33.81	37.19	C[CH+]C(C)C(C)CC	C=CC(C)C(C)CC	[H+]	37.19	-37.19	33.81	0.27	-0.27	70.73	C[CH+]C(C)C(C)CC	[H+]	C8H17+	H+
C8H17+	H+	32.54	38.46	C[CH+]C(C)C(C)CC	C=CC(C)C(C)CC	[H+]	38.46	-38.46	32.54	1.54	-1.54	69.46	C[CH+]C(C)C(C)CC	[H+]	C8H17+	H+
C8H17+	C3H6	45.24	25.76	CC(C)(C)CC[CH+]C	[CH2+]C(C)(C)C	C=CC	25.76	-25.76	45.24	9.67	-9.67	61.33	CC(C)(C)CC[CH+]C	C=CC	C8H17+	C3H6
C8H17+	C3H6	39.93	31.07	CC(C)(C)CC[CH+]C	[CH2+]C(C)(C)C	C=CC	31.07	-31.07	39.93	14.98	-14.98	56.02	CC(C)(C)CC[CH+]C	C=CC	C8H17+	C3H6
C8H17+	C4H8	25.04	45.96	CC(C)(C)CC[CH+]C	C[C+](C)C	CC1CC1	45.96	-45.96	25.04	29.32	-29.32	41.68	CC(C)(C)CC[CH+]C	CC1CC1	C8H17+	C4H8
C8H17+	H+	32.21	38.79	CC(C)(C)CC[CH+]C	CC(C)(C)C\C=C\C	[H+]	38.79	-38.79	32.21	4.49	-4.49	66.51	CC(C)(C)CC[CH+]C	[H+]	C8H17+	H+
C8H17+	H+	30.35	40.65	CC(C)(C)CC[CH+]C	CC(C)(C)CCC=C	[H+]	40.65	-40.65	30.35	1.88	-1.88	69.12	CC(C)(C)CC[CH+]C	[H+]	C8H17+	H+
C8H17+	C2H4	47.56	23.44	CC(C)(C)CCC[CH2+]	CC(C)(C)C[CH2+]	C=C	23.44	-23.44	47.56	8.54	-8.54	62.46	CC(C)(C)CCC[CH2+]	C=C	C8H17+	C2H4
C8H17+	C2H4	40.99	30.01	CC(C)(C)CCC[CH2+]	CC(C)(C)C[CH2+]	C=C	30.01	-30.01	40.99	15.11	-15.11	55.89	CC(C)(C)CCC[CH2+]	C=C	C8H17+	C2H4
C8H17+	H+	32.2	38.8	CC(C)(C)CCC[CH2+]	CC(C)(C)CCC=C	[H+]	38.8	-38.8	32.2	4.9	-4.9	66.1	CC(C)(C)CCC[CH2+]	[H+]	C8H17+	H+
C8H17+	CH3+	23.76	47.24	CC(C)(C[CH2+])CCC	CC1(C)CCCC1	[CH3+]	47.24	-47.24	23.76	46.39	-46.39	24.61	CC(C)(C[CH2+])CCC	[CH3+]	C8H17+	CH3+
C8H17+	C2H4	51.77	19.23	CC(C)(C[CH2+])CCC	C[C+](C)CCC	C=C	19.23	-19.23	51.77	10.29	-10.29	60.71	CC(C)(C[CH2+])CCC	C=C	C8H17+	C2H4
C8H17+	C2H4	45.47	25.53	CC(C)(C[CH2+])CCC	C[C+](C)CCC	C=C	25.53	-25.53	45.47	16.59	-16.59	54.41	CC(C)(C[CH2+])CCC	C=C	C8H17+	C2H4
C8H17+	H+	36.5	34.5	CC(C)(C[CH2+])CCC	C=CC(C)(C)CCC	[H+]	34.5	-34.5	36.5	4.52	-4.52	66.48	CC(C)(C[CH2+])CCC	[H+]	C8H17+	H+
C8H17+	H+	30.05	40.95	CC(C)(C[CH2+])CCC	C=CC(C)(C)CCC	[H+]	40.95	-40.95	30.05	10.97	-10.97	60.03	CC(C)(C[CH2+])CCC	[H+]	C8H17+	H+
C8H17+	C3H7+	47.2	23.8	CC(C)[CH+]CC(C)C	C=CC(C)C	C[CH+]C	23.8	-23.8	47.2	9.22	-9.22	61.78	CC(C)[CH+]CC(C)C	C[CH+]C	C8H17+	C3H7+
C8H17+	C3H7+	41.62	29.38	CC(C)[CH+]CC(C)C	C=CC(C)C	C[CH+]C	29.38	-29.38	41.62	14.8	-14.8	56.2	CC(C)[CH+]CC(C)C	C[CH+]C	C8H17+	C3H7+
C8H17+	CH3+	42.15	28.85	CC(C)[CH+]CC(C)C	CC(C)C\C=C\C	[CH3+]	28.85	-28.85	42.15	10.87	-10.87	60.13	CC(C)[CH+]CC(C)C	[CH3+]	C8H17+	CH3+
C8H17+	CH3+	37.37	33.63	CC(C)[CH+]CC(C)C	CC(C)C\C=C\C	[CH3+]	33.63	-33.63	37.37	15.65	-15.65	55.35	CC(C)[CH+]CC(C)C	[CH3+]	C8H17+	CH3+
C8H17+	H+	31.11	39.89	CC(C)[CH+]CC(C)C	C/C(C)=C\CC(C)C	[H+]	39.89	-39.89	31.11	6.96	-6.96	64.04	CC(C)[CH+]CC(C)C	[H+]	C8H17+	H+
C8H17+	H+	31.32	39.68	CC(C)[CH+]CC(C)C	CC(C)/C=C/C(C)C	[H+]	39.68	-39.68	31.32	4.9	-4.9	66.1	CC(C)[CH+]CC(C)C	[H+]	C8H17+	H+
C8H17+	C5H10	49.62	21.38	CC(C)C([CH2+])(C)CC	C[CH+]C	C=C(C)CC	21.38	-21.38	49.62	20.09	-20.09	50.91	CC(C)C([CH2+])(C)CC	C=C(C)CC	C8H17+	C5H10
C8H17+	C5H10	43.86	27.14	CC(C)C([CH2+])(C)CC	C[CH+]C	C=C(C)CC	27.14	-27.14	43.86	25.85	-25.85	45.15	CC(C)C([CH2+])(C)CC	C=C(C)CC	C8H17+	C5H10
C8H17+	C2H5+	47.97	23.03	CC(C)C([CH2+])(C)CC	C=C(C)C(C)C	[CH2+]C	23.03	-23.03	47.97	17.02	-17.02	53.98	CC(C)C([CH2+])(C)CC	[CH2+]C	C8H17+	C2H5+
C8H17+	C2H5+	40.65	30.35	CC(C)C([CH2+])(C)CC	C=C(C)C(C)C	[CH2+]C	30.35	-30.35	40.65	24.34	-24.34	46.66	CC(C)C([CH2+])(C)CC	[CH2+]C	C8H17+	C2H5+
C8H17+	CH3+	42.68	28.32	CC(C)C([CH2+])(C)CC	C=C(CC)C(C)C	[CH3+]	28.32	-28.32	42.68	17.82	-17.82	53.18	CC(C)C([CH2+])(C)CC	[CH3+]	C8H17+	CH3+
C8H17+	CH3+	37.44	33.56	CC(C)C([CH2+])(C)CC	C=C(CC)C(C)C	[CH3+]	33.56	-33.56	37.44	23.06	-23.06	47.94	CC(C)C([CH2+])(C)CC	[CH3+]	C8H17+	CH3+
C8H17+	CH3+	24.29	46.71	CC(C)C([CH2+])(C)CC	CC(C)C1(C)CC1	[CH3+]	46.71	-46.71	24.29	28.09	-28.09	42.91	CC(C)C([CH2+])(C)CC	[CH3+]	C8H17+	CH3+
C8H17+	C3H7+	50.61	20.39	CC(C)C(C)(C)[CH+]C	C\C=C(/C)C	C[CH+]C	20.39	-20.39	50.61	15.34	-15.34	55.66	CC(C)C(C)(C)[CH+]C	C[CH+]C	C8H17+	C3H7+
C8H17+	C3H7+	44.48	26.52	CC(C)C(C)(C)[CH+]C	C\C=C(/C)C	C[CH+]C	26.52	-26.52	44.48	21.47	-21.47	49.53	CC(C)C(C)(C)[CH+]C	C[CH+]C	C8H17+	C3H7+
C8H17+	CH3+	44.64	26.36	CC(C)C(C)(C)[CH+]C	C\C=C(/C)C(C)C	[CH3+]	26.36	-26.36	44.64	12.23	-12.23	58.77	CC(C)C(C)(C)[CH+]C	[CH3+]	C8H17+	CH3+
C8H17+	CH3+	36.96	34.04	CC(C)C(C)(C)[CH+]C	C\C=C(/C)C(C)C	[CH3+]	34.04	-34.04	36.96	19.91	-19.91	51.09	CC(C)C(C)(C)[CH+]C	[CH3+]	C8H17+	CH3+
C8H17+	H+	31.86	39.14	CC(C)C(C)(C)[CH+]C	CC(C)C(C)(C)C=C	[H+]	39.14	-39.14	31.86	1.81	-1.81	69.19	CC(C)C(C)(C)[CH+]C	[H+]	C8H17+	H+
C8H17+	C2H4	51.32	19.68	CC(C)C(C)(C)C[CH2+]	C[C+](C)C(C)C	C=C	19.68	-19.68	51.32	12.52	-12.52	58.48	CC(C)C(C)(C)C[CH2+]	C=C	C8H17+	C2H4
C8H17+	C2H4	45.24	25.76	CC(C)C(C)(C)C[CH2+]	C[C+](C)C(C)C	C=C	25.76	-25.76	45.24	18.6	-18.6	52.4	CC(C)C(C)(C)C[CH2+]	C=C	C8H17+	C2H4
C8H17+	H+	33.64	37.36	CC(C)C(C)(C)C[CH2+]	CC(C)C(C)(C)C=C	[H+]	37.36	-37.36	33.64	1.28	-1.28	69.72	CC(C)C(C)(C)C[CH2+]	[H+]	C8H17+	H+
C8H17+	H+	32.16	38.84	CC(C)C(C)(C)C[CH2+]	CC(C)C(C)(C)C=C	[H+]	38.84	-38.84	32.16	2.76	-2.76	68.24	CC(C)C(C)(C)C[CH2+]	[H+]	C8H17+	H+
C8H17+	H+	28.65	42.35	CC(C)C(C)(C)C[CH2+]	CC(C)C(C)(C)C=C	[H+]	42.35	-42.35	28.65	6.26	-6.26	64.74	CC(C)C(C)(C)C[CH2+]	[H+]	C8H17+	H+
C8H17+	C3H6	48.77	22.23	CC(C)C(C)C[CH+]C	C[CH+]C(C)C	C=CC	22.23	-22.23	48.77	10.51	-10.51	60.49	CC(C)C(C)C[CH+]C	C=CC	C8H17+	C3H6
C8H17+	C3H6	42.34	28.66	CC(C)C(C)C[CH+]C	C[CH+]C(C)C	C=CC	28.66	-28.66	42.34	16.94	-16.94	54.06	CC(C)C(C)C[CH+]C	C=CC	C8H17+	C3H6
C8H17+	H+	30.07	40.93	CC(C)C(C)C[CH+]C	CC(C)C(C)\C=C\C	[H+]	40.93	-40.93	30.07	7.02	-7.02	63.98	CC(C)C(C)C[CH+]C	[H+]	C8H17+	H+
C8H17+	H+	30.05	40.95	CC(C)C(C)C[CH+]C	CC(C)C(C)CC=C	[H+]	40.95	-40.95	30.05	1.8	-1.8	69.2	CC(C)C(C)C[CH+]C	[H+]	C8H17+	H+
C8H17+	C2H4	47.65	23.35	CC(C)C(C)CC[CH2+]	[CH2+]C(C)C(C)C	C=C	23.35	-23.35	47.65	9.86	-9.86	61.14	CC(C)C(C)CC[CH2+]	C=C	C8H17+	C2H4
C8H17+	C2H4	42.46	28.54	CC(C)C(C)CC[CH2+]	[CH2+]C(C)C(C)C	C=C	28.54	-28.54	42.46	15.05	-15.05	55.95	CC(C)C(C)CC[CH2+]	C=C	C8H17+	C2H4
C8H17+	C3H6	26.05	44.95	CC(C)C(C)CC[CH2+]	C[CH+]C(C)C	C1CC1	44.95	-44.95	26.05	29.24	-29.24	41.76	CC(C)C(C)CC[CH2+]	C1CC1	C8H17+	C3H6
C8H17+	H+	36.49	34.51	CC(C)C(C)CC[CH2+]	CC(C)C(C)CC=C	[H+]	34.51	-34.51	36.49	2.04	-2.04	68.96	CC(C)C(C)CC[CH2+]	[H+]	C8H17+	H+
C8H17+	H+	32.53	38.47	CC(C)C(C)CC[CH2+]	CC(C)C(C)CC=C	[H+]	38.47	-38.47	32.53	6	-6	65	CC(C)C(C)CC[CH2+]	[H+]	C8H17+	H+
C8H17+	C4H8	48.65	22.35	CC(C)CC([CH2+])(C)C	[CH2+]C(C)C	C=C(C)C	22.35	-22.35	48.65	15.08	-15.08	55.92	CC(C)CC([CH2+])(C)C	C=C(C)C	C8H17+	C4H8
C8H17+	C4H8	43.31	27.69	CC(C)CC([CH2+])(C)C	[CH2+]C(C)C	C=C(C)C	27.69	-27.69	43.31	20.42	-20.42	50.58	CC(C)CC([CH2+])(C)C	C=C(C)C	C8H17+	C4H8
C8H17+	CH3+	45.42	25.58	CC(C)CC([CH2+])(C)C	C=C(C)CC(C)C	[CH3+]	25.58	-25.58	45.42	13.18	-13.18	57.82	CC(C)CC([CH2+])(C)C	[CH3+]	C8H17+	CH3+
C8H17+	CH3+	41.03	29.97	CC(C)CC([CH2+])(C)C	C=C(C)CC(C)C	[CH3+]	29.97	-29.97	41.03	17.57	-17.57	53.43	CC(C)CC([CH2+])(C)C	[CH3+]	C8H17+	CH3+
C8H17+	C3H7+	28.96	42.04	CC(C)CC([CH2+])(C)C	CC1(C)CC1	C[CH+]C	42.04	-42.04	28.96	29.4	-29.4	41.6	CC(C)CC([CH2+])(C)C	C[CH+]C	C8H17+	C3H7+
C8H17+	C2H4	47.68	23.32	CC(C)CC(C)C[CH2+]	CC(C)C[CH+]C	C=C	23.32	-23.32	47.68	9.06	-9.06	61.94	CC(C)CC(C)C[CH2+]	C=C	C8H17+	C2H4
C8H17+	C2H4	41.9	29.1	CC(C)CC(C)C[CH2+]	CC(C)C[CH+]C	C=C	29.1	-29.1	41.9	14.84	-14.84	56.16	CC(C)CC(C)C[CH2+]	C=C	C8H17+	C2H4
C8H17+	H+	30.82	40.18	CC(C)CC(C)C[CH2+]	C=CC(C)CC(C)C	[H+]	40.18	-40.18	30.82	6.02	-6.02	64.98	CC(C)CC(C)C[CH2+]	[H+]	C8H17+	H+
C8H17+	C4H8	44.6	26.4	CC(C)CC[CH+]CC	[CH2+]C(C)C	C=CCC	26.4	-26.4	44.6	9.16	-9.16	61.84	CC(C)CC[CH+]CC	C=CCC	C8H17+	C4H8
C8H17+	C4H8	40.01	30.99	CC(C)CC[CH+]CC	[CH2+]C(C)C	C=CCC	30.99	-30.99	40.01	30.99	-30.99	40.01	CC(C)CC[CH+]CC	C=CCC	C8H17+	C4H8
C8H17+	CH3+	42.55	28.45	CC(C)CC[CH+]CC	CC(C)CCC=C	[CH3+]	28.45	-28.45	42.55	7.58	-7.58	63.42	CC(C)CC[CH+]CC	[CH3+]	C8H17+	CH3+
C8H17+	CH3+	38.08	32.92	CC(C)CC[CH+]CC	CC(C)CCC=C	[CH3+]	32.92	-32.92	38.08	32.92	-32.92	38.08	CC(C)CC[CH+]CC	[CH3+]	C8H17+	CH3+
C8H17+	H+	35.95	35.05	CC(C)CC[CH+]CC	CC(C)C\C=C\CC	[H+]	35.05	-35.05	35.95	1.43	-1.43	69.57	CC(C)CC[CH+]CC	[H+]	C8H17+	H+
C8H17+	H+	31.6	39.4	CC(C)CC[CH+]CC	CC(C)C\C=C\CC	[H+]	39.4	-39.4	31.6	39.4	-39.4	31.6	CC(C)CC[CH+]CC	[H+]	C8H17+	H+
C8H17+	H+	30.79	40.21	CC(C)CC[CH+]CC	CC(C)CC\C=C\C	[H+]	40.21	-40.21	30.79	4.54	-4.54	66.46	CC(C)CC[CH+]CC	[H+]	C8H17+	H+
C8H17+	C4H9+	25.41	45.59	CC(C[CH2+])C(C)(C)C	CC1CC1	C[C+](C)C	45.59	-45.59	25.41	36.28	-36.28	34.72	CC(C[CH2+])C(C)(C)C	C[C+](C)C	C8H17+	C4H9+
C8H17+	C2H4	49.69	21.31	CC(C[CH2+])C(C)(C)C	C[CH+]C(C)(C)C	C=C	21.31	-21.31	49.69	11.15	-11.15	59.85	CC(C[CH2+])C(C)(C)C	C=C	C8H17+	C2H4
C8H17+	C2H4	44.45	26.55	CC(C[CH2+])C(C)(C)C	C[CH+]C(C)(C)C	C=C	26.55	-26.55	44.45	16.39	-16.39	54.61	CC(C[CH2+])C(C)(C)C	C=C	C8H17+	C2H4
C8H17+	H+	36.13	34.87	CC(C[CH2+])C(C)(C)C	C=CC(C)C(C)(C)C	[H+]	34.87	-34.87	36.13	3.51	-3.51	67.49	CC(C[CH2+])C(C)(C)C	[H+]	C8H17+	H+
C8H17+	H+	32.89	38.11	CC(C[CH2+])C(C)(C)C	C=CC(C)C(C)(C)C	[H+]	38.11	-38.11	32.89	6.75	-6.75	64.25	CC(C[CH2+])C(C)(C)C	[H+]	C8H17+	H+
C8H17+	H+	29.51	41.49	CC(C[CH2+])C(C)(C)C	C=CC(C)C(C)(C)C	[H+]	41.49	-41.49	29.51	10.13	-10.13	60.87	CC(C[CH2+])C(C)(C)C	[H+]	C8H17+	H+
C8H17+	CH3+	22.19	48.81	CC(C[CH2+])C(C)CC	CC1CCCC1C	[CH3+]	48.81	-48.81	22.19	49.78	-49.78	21.22	CC(C[CH2+])C(C)CC	[CH3+]	C8H17+	CH3+
C8H17+	C2H4	50.76	20.24	CC(C[CH2+])C(C)CC	C[CH+]C(C)CC	C=C	20.24	-20.24	50.76	9.76	-9.76	61.24	CC(C[CH2+])C(C)CC	C=C	C8H17+	C2H4
C8H17+	C2H4	45.42	25.58	CC(C[CH2+])C(C)CC	C[CH+]C(C)CC	C=C	25.58	-25.58	45.42	15.1	-15.1	55.9	CC(C[CH2+])C(C)CC	C=C	C8H17+	C2H4
C8H17+	H+	36.36	34.64	CC(C[CH2+])C(C)CC	C=CC(C)C(C)CC	[H+]	34.64	-34.64	36.36	1.9	-1.9	69.1	CC(C[CH2+])C(C)CC	[H+]	C8H17+	H+
C8H17+	H+	29.44	41.56	CC(C[CH2+])C(C)CC	C=CC(C)C(C)CC	[H+]	41.56	-41.56	29.44	8.82	-8.82	62.18	CC(C[CH2+])C(C)CC	[H+]	C8H17+	H+
C8H17+	C4H8	51.07	19.93	CC(CC)C([CH2+])(C)C	C[CH+]CC	C=C(C)C	19.93	-19.93	51.07	18.63	-18.63	52.37	CC(CC)C([CH2+])(C)C	C=C(C)C	C8H17+	C4H8
C8H17+	C4H8	44.37	26.63	CC(CC)C([CH2+])(C)C	C[CH+]CC	C=C(C)C	26.63	-26.63	44.37	25.33	-25.33	45.67	CC(CC)C([CH2+])(C)C	C=C(C)C	C8H17+	C4H8
C8H17+	CH3+	42.93	28.07	CC(CC)C([CH2+])(C)C	C=C(C)C(C)CC	[CH3+]	28.07	-28.07	42.93	15.8	-15.8	55.2	CC(CC)C([CH2+])(C)C	[CH3+]	C8H17+	CH3+
C8H17+	CH3+	38.15	32.85	CC(CC)C([CH2+])(C)C	C=C(C)C(C)CC	[CH3+]	32.85	-32.85	38.15	20.58	-20.58	50.42	CC(CC)C([CH2+])(C)C	[CH3+]	C8H17+	CH3+
C8H17+	C2H5+	24.05	46.95	CC(CC)C([CH2+])(C)C	CC1CC1(C)C	[CH2+]C	46.95	-46.95	24.05	34.42	-34.42	36.58	CC(CC)C([CH2+])(C)C	[CH2+]C	C8H17+	C2H5+
C8H17+	C2H5+	22.14	48.86	CC(CC[CH2+])CCC	CC1CCCC1	[CH2+]C	48.86	-48.86	22.14	48.43	-48.43	22.57	CC(CC[CH2+])CCC	[CH2+]C	C8H17+	C2H5+
C8H17+	C2H4	45.81	25.19	CC(CC[CH2+])CCC	[CH2+]C(C)CCC	C=C	25.19	-25.19	45.81	9.67	-9.67	61.33	CC(CC[CH2+])CCC	C=C	C8H17+	C2H4
C8H17+	C2H4	41.02	29.98	CC(CC[CH2+])CCC	[CH2+]C(C)CCC	C=C	29.98	-29.98	41.02	14.46	-14.46	56.54	CC(CC[CH2+])CCC	C=C	C8H17+	C2H4
C8H17+	C3H6	24.57	46.43	CC(CC[CH2+])CCC	CCC[CH+]C	C1CC1	46.43	-46.43	24.57	29.2	-29.2	41.8	CC(CC[CH2+])CCC	C1CC1	C8H17+	C3H6
C8H17+	H+	36.52	34.48	CC(CC[CH2+])CCC	CC(CC=C)CCC	[H+]	34.48	-34.48	36.52	1.92	-1.92	69.08	CC(CC[CH2+])CCC	[H+]	C8H17+	H+
C8H17+	H+	33.68	37.32	CC(CC[CH2+])CCC	CC(CC=C)CCC	[H+]	37.32	-37.32	33.68	4.76	-4.76	66.24	CC(CC[CH2+])CCC	[H+]	C8H17+	H+
C8H17+	C2H5+	45.44	25.56	CC[CH+]C(C)(C)CC	C/C(C)=C\CC	[CH2+]C	25.56	-25.56	45.44	13.93	-13.93	57.07	CC[CH+]C(C)(C)CC	[CH2+]C	C8H17+	C2H5+
C8H17+	C2H5+	39.94	31.06	CC[CH+]C(C)(C)CC	C/C(C)=C\CC	[CH2+]C	31.06	-31.06	39.94	19.43	-19.43	51.57	CC[CH+]C(C)(C)CC	[CH2+]C	C8H17+	C2H5+
C8H17+	CH3+	43.57	27.43	CC[CH+]C(C)(C)CC	CC\C=C(/C)CC	[CH3+]	27.43	-27.43	43.57	11.85	-11.85	59.15	CC[CH+]C(C)(C)CC	[CH3+]	C8H17+	CH3+
C8H17+	CH3+	38.65	32.35	CC[CH+]C(C)(C)CC	CC\C=C(/C)CC	[CH3+]	32.35	-32.35	38.65	16.77	-16.77	54.23	CC[CH+]C(C)(C)CC	[CH3+]	C8H17+	CH3+
C8H17+	CH3+	41.74	29.26	CC[CH+]C(C)(C)CC	C=CC(C)(C)CC	[CH3+]	29.26	-29.26	41.74	8.64	-8.64	62.36	CC[CH+]C(C)(C)CC	[CH3+]	C8H17+	CH3+
C8H17+	CH3+	37.81	33.19	CC[CH+]C(C)(C)CC	C=CC(C)(C)CC	[CH3+]	33.19	-33.19	37.81	12.57	-12.57	58.43	CC[CH+]C(C)(C)CC	[CH3+]	C8H17+	CH3+
C8H17+	H+	27.12	43.88	CC[CH+]C(C)(C)CC	C\C=C\C(C)(C)CC	[H+]	43.88	-43.88	27.12	4.85	-4.85	66.15	CC[CH+]C(C)(C)CC	[H+]	C8H17+	H+
C8H17+	C3H7+	48.26	22.74	CC[CH+]C(C)C(C)C	C\C=C/CC	C[CH+]C	22.74	-22.74	48.26	12.25	-12.25	58.75	CC[CH+]C(C)C(C)C	C[CH+]C	C8H17+	C3H7+
C8H17+	C3H7+	42.25	28.75	CC[CH+]C(C)C(C)C	C\C=C/CC	C[CH+]C	28.75	-28.75	42.25	18.26	-18.26	52.74	CC[CH+]C(C)C(C)C	C[CH+]C	C8H17+	C3H7+
C8H17+	CH3+	42.31	28.69	CC[CH+]C(C)C(C)C	CC\C=C/C(C)C	[CH3+]	28.69	-28.69	42.31	11.96	-11.96	59.04	CC[CH+]C(C)C(C)C	[CH3+]	C8H17+	CH3+
C8H17+	CH3+	40.21	30.79	CC[CH+]C(C)C(C)C	CC\C=C/C(C)C	[CH3+]	30.79	-30.79	40.21	14.06	-14.06	56.94	CC[CH+]C(C)C(C)C	[CH3+]	C8H17+	CH3+
C8H17+	CH3+	41.35	29.65	CC[CH+]C(C)C(C)C	CC(C)C(C)C=C	[CH3+]	29.65	-29.65	41.35	8.07	-8.07	62.93	CC[CH+]C(C)C(C)C	[CH3+]	C8H17+	CH3+
C8H17+	CH3+	37.72	33.28	CC[CH+]C(C)C(C)C	CC(C)C(C)C=C	[CH3+]	33.28	-33.28	37.72	11.7	-11.7	59.3	CC[CH+]C(C)C(C)C	[CH3+]	C8H17+	CH3+
C8H17+	H+	35.94	35.06	CC[CH+]C(C)C(C)C	CC\C=C(/C)C(C)C	[H+]	35.06	-35.06	35.94	3.03	-3.03	67.97	CC[CH+]C(C)C(C)C	[H+]	C8H17+	H+
C8H17+	H+	29.97	41.03	CC[CH+]C(C)C(C)C	CC\C=C(/C)C(C)C	[H+]	41.03	-41.03	29.97	9	-9	62	CC[CH+]C(C)C(C)C	[H+]	C8H17+	H+
C8H17+	H+	35.22	35.78	CC[CH+]C(C)C(C)C	CC(C)C(C)\C=C\C	[H+]	35.78	-35.78	35.22	0.96	-0.96	70.04	CC[CH+]C(C)C(C)C	[H+]	C8H17+	H+
C8H17+	H+	28.24	42.76	CC[CH+]C(C)C(C)C	CC(C)C(C)\C=C\C	[H+]	42.76	-42.76	28.24	7.94	-7.94	63.06	CC[CH+]C(C)C(C)C	[H+]	C8H17+	H+
C8H15+	CH3+	43.74	27.26	CC1[CH+]CCC(C)C1	CC1CC=CCC1	[CH3+]	27.26	-27.26	43.74	9.87	-9.87	61.13	CC1[CH+]CCC(C)C1	[CH3+]	C8H15+	CH3+
C8H15+	CH3+	37.64	33.36	CC1[CH+]CCC(C)C1	CC1CC=CCC1	[CH3+]	33.36	-33.36	37.64	15.97	-15.97	55.03	CC1[CH+]CCC(C)C1	[CH3+]	C8H15+	CH3+
C8H15+	H+	32.7	38.3	CC1[CH+]CCC(C)C1	CC=1CC(C)CCC=1	[H+]	38.3	-38.3	32.7	8.15	-8.15	62.85	CC1[CH+]CCC(C)C1	[H+]	C8H15+	H+
C8H15+	H+	36.43	34.57	CC1[CH+]CCC(C)C1	CC1C=CCC(C)C1	[H+]	34.57	-34.57	36.43	0.65	-0.65	70.35	CC1[CH+]CCC(C)C1	[H+]	C8H15+	H+
C8H15+	H+	35.35	35.65	CC1[CH+]CCC(C)C1	CC1C=CCC(C)C1	[H+]	35.65	-35.65	35.35	1.73	-1.73	69.27	CC1[CH+]CCC(C)C1	[H+]	C8H15+	H+
C8H15+	H+	31.63	39.37	CC1[CH+]CCC(C)C1	CC1C=CCC(C)C1	[H+]	39.37	-39.37	31.63	5.45	-5.45	65.55	CC1[CH+]CCC(C)C1	[H+]	C8H15+	H+
C8H15+	CH3+	44.17	26.83	CC1[CH+]CCCC1C	CC1C=CCCC1	[CH3+]	26.83	-26.83	44.17	10.21	-10.21	60.79	CC1[CH+]CCCC1C	[CH3+]	C8H15+	CH3+
C8H15+	CH3+	35.31	35.69	CC1[CH+]CCCC1C	CC1C=CCCC1	[CH3+]	35.69	-35.69	35.31	19.07	-19.07	51.93	CC1[CH+]CCCC1C	[CH3+]	C8H15+	CH3+
C8H15+	H+	31.81	39.19	CC1[CH+]CCCC1C	CC1=CCCCC1C	[H+]	39.19	-39.19	31.81	8.75	-8.75	62.25	CC1[CH+]CCCC1C	[H+]	C8H15+	H+
C8H15+	H+	36.81	34.19	CC1[CH+]CCCC1C	CC1C=CCCC1C	[H+]	34.19	-34.19	36.81	0.66	-0.66	70.34	CC1[CH+]CCCC1C	[H+]	C8H15+	H+
C8H15+	H+	35.78	35.22	CC1[CH+]CCCC1C	CC1C=CCCC1C	[H+]	35.22	-35.22	35.78	1.69	-1.69	69.31	CC1[CH+]CCCC1C	[H+]	C8H15+	H+
C8H15+	H+	31.6	39.4	CC1[CH+]CCCC1C	CC1C=CCCC1C	[H+]	39.4	-39.4	31.6	5.87	-5.87	65.13	CC1[CH+]CCCC1C	[H+]	C8H15+	H+
C8H15+	H+	40.53	30.47	CC1C[CH+]CC(C)C1	CC1C=CCC(C)C1	[H+]	30.47	-30.47	40.53	-3.39	3.39	74.39	CC1C[CH+]CC(C)C1	[H+]	C8H15+	H+
C8H15+	H+	35.1	35.9	CC1C[CH+]CC(C)C1	CC1C=CCC(C)C1	[H+]	35.9	-35.9	35.1	2.04	-2.04	68.96	CC1C[CH+]CC(C)C1	[H+]	C8H15+	H+
C8H15+	H+	33.06	37.94	CC1C[CH+]CC(C)C1	CC1C=CCC(C)C1	[H+]	37.94	-37.94	33.06	4.08	-4.08	66.92	CC1C[CH+]CC(C)C1	[H+]	C8H15+	H+
C8H15+	H+	31.24	39.76	CC1C[CH+]CC(C)C1	CC1C=CCC(C)C1	[H+]	39.76	-39.76	31.24	5.9	-5.9	65.1	CC1C[CH+]CC(C)C1	[H+]	C8H15+	H+
C8H15+	H+	35.92	35.08	CC1C[CH+]CCC1C	CC1CC=CCC1C	[H+]	35.08	-35.08	35.92	0.52	-0.52	70.48	CC1C[CH+]CCC1C	[H+]	C8H15+	H+
C8H15+	H+	34.86	36.14	CC1C[CH+]CCC1C	CC1CC=CCC1C	[H+]	36.14	-36.14	34.86	1.58	-1.58	69.42	CC1C[CH+]CCC1C	[H+]	C8H15+	H+
C8H15+	H+	32.9	38.1	CC1C[CH+]CCC1C	CC1CC=CCC1C	[H+]	38.1	-38.1	32.9	3.54	-3.54	67.46	CC1C[CH+]CCC1C	[H+]	C8H15+	H+
C8H15+	H+	33.83	37.17	CC1C[CH+]CCC1C	CC1C=CCCC1C	[H+]	37.17	-37.17	33.83	2.6	-2.6	68.4	CC1C[CH+]CCC1C	[H+]	C8H15+	H+
C8H15+	H+	32.79	38.21	CC1C[CH+]CCC1C	CC1C=CCCC1C	[H+]	38.21	-38.21	32.79	3.64	-3.64	67.36	CC1C[CH+]CCC1C	[H+]	C8H15+	H+
C8H17+	C5H10	45.75	25.25	CCCC[CH+]C(C)C	[CH2+]CC	C=CC(C)C	25.25	-25.25	45.75	9.12	-9.12	61.88	CCCC[CH+]C(C)C	C=CC(C)C	C8H17+	C5H10
C8H17+	C5H10	39.4	31.6	CCCC[CH+]C(C)C	[CH2+]CC	C=CC(C)C	31.6	-31.6	39.4	15.47	-15.47	55.53	CCCC[CH+]C(C)C	C=CC(C)C	C8H17+	C5H10
C8H17+	CH3+	44.23	26.77	CCCC[CH+]C(C)C	C\C=C\CCCC	[CH3+]	26.77	-26.77	44.23	9.9	-9.9	61.1	CCCC[CH+]C(C)C	[CH3+]	C8H17+	CH3+
C8H17+	CH3+	40.2	30.8	CCCC[CH+]C(C)C	C\C=C\CCCC	[CH3+]	30.8	-30.8	40.2	13.93	-13.93	57.07	CCCC[CH+]C(C)C	[CH3+]	C8H17+	CH3+
C8H17+	H+	36.95	34.05	CCCC[CH+]C(C)C	C/C(C)=C\CCCC	[H+]	34.05	-34.05	36.95	2.16	-2.16	68.84	CCCC[CH+]C(C)C	[H+]	C8H17+	H+
C2H4	C2H5+	68.88	2.12	[CH2+]C	C=C	[H+]	40.34	-40.34	30.66	2.12	-2.12	68.88	C=C	[CH2+]C	C2H4	C2H5+
C6H13+	C6H13+	30.84	40.16	[CH2+]C(C)(C)CC	C[CH+]C(C)(C)C		36.25	-36.25	34.75	40.16	-40.16	30.84	C[CH+]C(C)(C)C	[CH2+]C(C)(C)CC	C6H13+	C6H13+
C6H13+	C6H13+	47.62	23.38	[CH2+]C(C)(C)CC	CC(C)(C)C[CH2+]		22.36	-22.36	48.64	23.38	-23.38	47.62	CC(C)(C)C[CH2+]	[CH2+]C(C)(C)CC	C6H13+	C6H13+
C4H8	C6H13+	57.24	13.76	[CH2+]C(C)(C)CC	C=C(C)C	[CH2+]C	24.38	-24.38	46.62	13.76	-13.76	57.24	C=C(C)C	[CH2+]C(C)(C)CC	C4H8	C6H13+
C4H8	C6H13+	51.36	19.64	[CH2+]C(C)(C)CC	C=C(C)C	[CH2+]C	30.26	-30.26	40.74	19.64	-19.64	51.36	C=C(C)C	[CH2+]C(C)(C)CC	C4H8	C6H13+
C5H10	C6H13+	58.27	12.73	[CH2+]C(C)(C)CC	C=C(C)CC	[CH3+]	27.27	-27.27	43.73	12.73	-12.73	58.27	C=C(C)CC	[CH2+]C(C)(C)CC	C5H10	C6H13+
C5H10	C6H13+	53.65	17.35	[CH2+]C(C)(C)CC	C=C(C)CC	[CH3+]	31.89	-31.89	39.11	17.35	-17.35	53.65	C=C(C)CC	[CH2+]C(C)(C)CC	C5H10	C6H13+
C4H9+	C4H9+	29.1	41.9	[CH2+]C(C)C	C[C+](C)C		34.66	-34.66	36.34	41.9	-41.9	29.1	C[C+](C)C	[CH2+]C(C)C	C4H9+	C4H9+
C4H9+	C4H9+	28.04	42.96	[CH2+]C(C)C	C[C+](C)C		35.72	-35.72	35.28	42.96	-42.96	28.04	C[C+](C)C	[CH2+]C(C)C	C4H9+	C4H9+
C3H6	C4H9+	60.65	10.35	[CH2+]C(C)C	C=CC	[CH3+]	28.65	-28.65	42.35	10.35	-10.35	60.65	C=CC	[CH2+]C(C)C	C3H6	C4H9+
C3H6	C4H9+	56.51	14.49	[CH2+]C(C)C	C=CC	[CH3+]	32.79	-32.79	38.21	14.49	-14.49	56.51	C=CC	[CH2+]C(C)C	C3H6	C4H9+
C4H8	C4H9+	63.28	7.72	[CH2+]C(C)C	C=C(C)C	[H+]	38.94	-38.94	32.06	7.72	-7.72	63.28	C=C(C)C	[CH2+]C(C)C	C4H8	C4H9+
C7H15+	C6H13+	28.6	42.4	[CH2+]C(C)C(C)C	C[C+](C)C(C)(C)C		35.22	-35.22	35.78	42.4	-42.4	28.6	C[C+](C)C(C)(C)C	[CH2+]C(C)C(C)C	C7H15+	C6H13+
C3H6	C6H13+	59.19	11.81	[CH2+]C(C)C(C)C	C=CC	C[CH+]C	21.71	-21.71	49.29	11.81	-11.81	59.19	C=CC	[CH2+]C(C)C(C)C	C3H6	C6H13+
C3H6	C6H13+	52.7	18.3	[CH2+]C(C)C(C)C	C=CC	C[CH+]C	28.2	-28.2	42.8	18.3	-18.3	52.7	C=CC	[CH2+]C(C)C(C)C	C3H6	C6H13+
C5H10	C6H13+	59.47	11.53	[CH2+]C(C)C(C)C	C=CC(C)C	[CH3+]	28.51	-28.51	42.49	11.53	-11.53	59.47	C=CC(C)C	[CH2+]C(C)C(C)C	C5H10	C6H13+
C5H10	C6H13+	55.39	15.61	[CH2+]C(C)C(C)C	C=CC(C)C	[CH3+]	32.59	-32.59	38.41	15.61	-15.61	55.39	C=CC(C)C	[CH2+]C(C)C(C)C	C5H10	C6H13+
C6H12	C6H13+	61.77	9.23	[CH2+]C(C)C(C)C	C=C(C)C(C)C	[H+]	40.6	-40.6	30.4	9.23	-9.23	61.77	C=C(C)C(C)C	[CH2+]C(C)C(C)C	C6H12	C6H13+
C6H11+	C6H11+	2.37	68.63	[CH2+]C(C)C1CC1	CC1[CH+]CCC1		43.33	-43.33	27.67	68.63	-68.63	2.37	CC1[CH+]CCC1	[CH2+]C(C)C1CC1	C6H11+	C6H11+
C6H11+	C6H11+	27.05	43.95	[CH2+]C(C)C1CC1	C[C+](C)C1CC1		34.29	-34.29	36.71	43.95	-43.95	27.05	C[C+](C)C1CC1	[CH2+]C(C)C1CC1	C6H11+	C6H11+
C6H11+	C6H11+	23.12	47.88	[CH2+]C(C)C1CC1	[CH2+]C1CCC1C		41.39	-41.39	29.61	47.88	-47.88	23.12	[CH2+]C1CCC1C	[CH2+]C(C)C1CC1	C6H11+	C6H11+
C6H11+	C6H11+	43.02	27.98	[CH2+]C(C)C1CC1	CC1CC1C[CH2+]		26.6	-26.6	44.4	27.98	-27.98	43.02	CC1CC1C[CH2+]	[CH2+]C(C)C1CC1	C6H11+	C6H11+
C6H11+	C6H11+	41.12	29.88	[CH2+]C(C)C1CC1	CC1CC1C[CH2+]		28.5	-28.5	42.5	29.88	-29.88	41.12	CC1CC1C[CH2+]	[CH2+]C(C)C1CC1	C6H11+	C6H11+
C6H11+	C6H11+	29.45	41.55	[CH2+]C(C)C1CC1	CC1CC1C[CH2+]		40.17	-40.17	30.83	41.55	-41.55	29.45	CC1CC1C[CH2+]	[CH2+]C(C)C1CC1	C6H11+	C6H11+
C6H11+	C6H11+	31.95	39.05	[CH2+]C(C)C1CC1	CC(C)[C+]1CC1		39.91	-39.91	31.09	39.05	-39.05	31.95	CC(C)[C+]1CC1	[CH2+]C(C)C1CC1	C6H11+	C6H11+
C6H11+	C6H11+	51.83	19.17	[CH2+]C(C)C1CC1	CC(C)C1[CH+]C1		25.42	-25.42	45.58	19.17	-19.17	51.83	CC(C)C1[CH+]C1	[CH2+]C(C)C1CC1	C6H11+	C6H11+
C5H8	C6H11+	60.96	10.04	[CH2+]C(C)C1CC1	C=CC1CC1	[CH3+]	27.08	-27.08	43.92	10.04	-10.04	60.96	C=CC1CC1	[CH2+]C(C)C1CC1	C5H8	C6H11+
C5H8	C6H11+	56.06	14.94	[CH2+]C(C)C1CC1	C=CC1CC1	[CH3+]	31.98	-31.98	39.02	14.94	-14.94	56.06	C=CC1CC1	[CH2+]C(C)C1CC1	C5H8	C6H11+
C3H6	C6H11+	63.88	7.12	[CH2+]C(C)C1CC1	C=CC	[CH+]1CC1	30.02	-30.02	40.98	7.12	-7.12	63.88	C=CC	[CH2+]C(C)C1CC1	C3H6	C6H11+
C3H6	C6H11+	57.78	13.22	[CH2+]C(C)C1CC1	C=CC	[CH+]1CC1	36.12	-36.12	34.88	13.22	-13.22	57.78	C=CC	[CH2+]C(C)C1CC1	C3H6	C6H11+
C6H10	C6H11+	67.63	3.37	[CH2+]C(C)C1CC1	C=C(C)C1CC1	[H+]	33.45	-33.45	37.55	3.37	-3.37	67.63	C=C(C)C1CC1	[CH2+]C(C)C1CC1	C6H10	C6H11+
C6H10	C6H11+	62.87	8.13	[CH2+]C(C)C1CC1	C=C(C)C1CC1	[H+]	38.21	-38.21	32.79	8.13	-8.13	62.87	C=C(C)C1CC1	[CH2+]C(C)C1CC1	C6H10	C6H11+
C6H13+	C6H13+	27.72	43.28	[CH2+]C(C)CCC	C[C+](C)CCC		36.04	-36.04	34.96	43.28	-43.28	27.72	C[C+](C)CCC	[CH2+]C(C)CCC	C6H13+	C6H13+
C6H13+	C6H13+	45.7	25.3	[CH2+]C(C)CCC	CC(C)C[CH+]C		19.88	-19.88	51.12	25.3	-25.3	45.7	CC(C)C[CH+]C	[CH2+]C(C)CCC	C6H13+	C6H13+
C6H13+	C6H13+	30.53	40.47	[CH2+]C(C)CCC	CC[CH+]C(C)C		37.04	-37.04	33.96	40.47	-40.47	30.53	CC[CH+]C(C)C	[CH2+]C(C)CCC	C6H13+	C6H13+
C6H13+	C6H13+	56.03	14.97	[CH2+]C(C)CCC	CC(C)CC[CH2+]		15.31	-15.31	55.69	14.97	-14.97	56.03	CC(C)CC[CH2+]	[CH2+]C(C)CCC	C6H13+	C6H13+
C3H6	C6H13+	59.94	11.06	[CH2+]C(C)CCC	C=CC	[CH2+]CC	25.08	-25.08	45.92	11.06	-11.06	59.94	C=CC	[CH2+]C(C)CCC	C3H6	C6H13+
C3H6	C6H13+	54.3	16.7	[CH2+]C(C)CCC	C=CC	[CH2+]CC	30.72	-30.72	40.28	16.7	-16.7	54.3	C=CC	[CH2+]C(C)CCC	C3H6	C6H13+
C5H10	C6H13+	60.9	10.1	[CH2+]C(C)CCC	CCCC=C	[CH3+]	27.8	-27.8	43.2	10.1	-10.1	60.9	CCCC=C	[CH2+]C(C)CCC	C5H10	C6H13+
C5H10	C6H13+	56.71	14.29	[CH2+]C(C)CCC	CCCC=C	[CH3+]	31.99	-31.99	39.01	14.29	-14.29	56.71	CCCC=C	[CH2+]C(C)CCC	C5H10	C6H13+
C6H12	C6H13+	67.57	3.43	[CH2+]C(C)CCC	C=C(C)CCC	[H+]	35.41	-35.41	35.59	3.43	-3.43	67.57	C=C(C)CCC	[CH2+]C(C)CCC	C6H12	C6H13+
C6H12	C6H13+	62.83	8.17	[CH2+]C(C)CCC	C=C(C)CCC	[H+]	40.15	-40.15	30.85	8.17	-8.17	62.83	C=C(C)CCC	[CH2+]C(C)CCC	C6H12	C6H13+
C8H17+	C8H17+	27.81	43.19	[CH2+]C(CC)CCCC	C[C+](CC)CCCC		35.46	-35.46	35.54	43.19	-43.19	27.81	C[C+](CC)CCCC	[CH2+]C(CC)CCCC	C8H17+	C8H17+
C8H17+	C8H17+	46.05	24.95	[CH2+]C(CC)CCCC	CC(C[CH+]CC)CC		19.34	-19.34	51.66	24.95	-24.95	46.05	CC(C[CH+]CC)CC	[CH2+]C(CC)CCCC	C8H17+	C8H17+
C8H17+	C8H17+	26.4	44.6	[CH2+]C(CC)CCCC	CCC[CH+]C(C)CC		39.25	-39.25	31.75	44.6	-44.6	26.4	CCC[CH+]C(C)CC	[CH2+]C(CC)CCCC	C8H17+	C8H17+
C8H17+	C8H17+	31.4	39.6	[CH2+]C(CC)CCCC	C[CH+]C(C)CCCC		35.14	-35.14	35.86	39.6	-39.6	31.4	C[CH+]C(C)CCCC	[CH2+]C(CC)CCCC	C8H17+	C8H17+
C8H17+	C8H17+	47.86	23.14	[CH2+]C(CC)CCCC	[CH2+]C(CC)CCCC		22	-22	49	23.14	-23.14	47.86	[CH2+]C(CC)CCCC	[CH2+]C(CC)CCCC	C8H17+	C8H17+
C8H17+	C8H17+	53.9	17.1	[CH2+]C(CC)CCCC	CC(CC)CC[CH+]C		16.35	-16.35	54.65	17.1	-17.1	53.9	CC(CC)CC[CH+]C	[CH2+]C(CC)CCCC	C8H17+	C8H17+
C8H17+	C8H17+	51.68	19.32	[CH2+]C(CC)CCCC	CC(CC)CCC[CH2+]		21.31	-21.31	49.69	19.32	-19.32	51.68	CC(CC)CCC[CH2+]	[CH2+]C(CC)CCCC	C8H17+	C8H17+
C4H8	C8H17+	58.96	12.04	[CH2+]C(CC)CCCC	C=CCC	CCC[CH2+]	24.92	-24.92	46.08	12.04	-12.04	58.96	C=CCC	[CH2+]C(CC)CCCC	C4H8	C8H17+
C4H8	C8H17+	53.13	17.87	[CH2+]C(CC)CCCC	C=CCC	CCC[CH2+]	30.75	-30.75	40.25	17.87	-17.87	53.13	C=CCC	[CH2+]C(CC)CCCC	C4H8	C8H17+
C6H12	C8H17+	60	11	[CH2+]C(CC)CCCC	C=CCCCC	[CH2+]C	24.38	-24.38	46.62	11	-11	60	C=CCCCC	[CH2+]C(CC)CCCC	C6H12	C8H17+
C6H12	C8H17+	54.61	16.39	[CH2+]C(CC)CCCC	C=CCCCC	[CH2+]C	29.77	-29.77	41.23	16.39	-16.39	54.61	C=CCCCC	[CH2+]C(CC)CCCC	C6H12	C8H17+
C8H16	C8H17+	63.25	7.75	[CH2+]C(CC)CCCC	C=C(CC)CCCC	[H+]	39.4	-39.4	31.6	7.75	-7.75	63.25	C=C(CC)CCCC	[CH2+]C(CC)CCCC	C8H16	C8H17+
C6H11+	C6H11+	58.44	12.56	[CH2+]C1(CC)CC1	C=C(C[CH2+])CC		7.91	-7.91	63.09	12.56	-12.56	58.44	C=C(C[CH2+])CC	[CH2+]C1(CC)CC1	C6H11+	C6H11+
C6H11+	C6H11+	55.88	15.12	[CH2+]C1(CC)CC1	C=C(C[CH2+])CC		10.47	-10.47	60.53	15.12	-15.12	55.88	C=C(C[CH2+])CC	[CH2+]C1(CC)CC1	C6H11+	C6H11+
C6H11+	C6H11+	22.93	48.07	[CH2+]C1(CC)CC1	CC[C+]1CCC1		45.27	-45.27	25.73	48.07	-48.07	22.93	CC[C+]1CCC1	[CH2+]C1(CC)CC1	C6H11+	C6H11+
C6H11+	C6H11+	27	44	[CH2+]C1(CC)CC1	C[CH+]C1(C)CC1		41.31	-41.31	29.69	44	-44	27	C[CH+]C1(C)CC1	[CH2+]C1(CC)CC1	C6H11+	C6H11+
C6H11+	C6H11+	46.72	24.28	[CH2+]C1(CC)CC1	CC1(C[CH2+])CC1		26.92	-26.92	44.08	24.28	-24.28	46.72	CC1(C[CH2+])CC1	[CH2+]C1(CC)CC1	C6H11+	C6H11+
C6H11+	C6H11+	33.82	37.18	[CH2+]C1(CC)CC1	CC1(CC)[CH+]C1		46.9	-46.9	24.1	37.18	-37.18	33.82	CC1(CC)[CH+]C1	[CH2+]C1(CC)CC1	C6H11+	C6H11+
C4H6	C6H11+	59.19	11.81	[CH2+]C1(CC)CC1	C=C1CC1	[CH2+]C	39.18	-39.18	31.82	11.81	-11.81	59.19	C=C1CC1	[CH2+]C1(CC)CC1	C4H6	C6H11+
C4H6	C6H11+	54.58	16.42	[CH2+]C1(CC)CC1	C=C1CC1	[CH2+]C	43.79	-43.79	27.21	16.42	-16.42	54.58	C=C1CC1	[CH2+]C1(CC)CC1	C4H6	C6H11+
C6H11+	C6H11+	34.68	36.32	[CH2+]C1CC(C)C1	C[C+]1CC(C)C1		31.63	-31.63	39.37	36.32	-36.32	34.68	C[C+]1CC(C)C1	[CH2+]C1CC(C)C1	C6H11+	C6H11+
C6H11+	C6H11+	28.73	42.27	[CH2+]C1CC(C)C1	C[C+]1CC(C)C1		37.58	-37.58	33.42	42.27	-42.27	28.73	C[C+]1CC(C)C1	[CH2+]C1CC(C)C1	C6H11+	C6H11+
C6H11+	C6H11+	27.18	43.82	[CH2+]C1CC(C)C1	C[C+]1CC(C)C1		39.13	-39.13	31.87	43.82	-43.82	27.18	C[C+]1CC(C)C1	[CH2+]C1CC(C)C1	C6H11+	C6H11+
C6H11+	C6H11+	55.61	15.39	[CH2+]C1CC(C)C1	[CH2+]C(C)CC=C		13.06	-13.06	57.94	15.39	-15.39	55.61	[CH2+]C(C)CC=C	[CH2+]C1CC(C)C1	C6H11+	C6H11+
C6H11+	C6H11+	51.65	19.35	[CH2+]C1CC(C)C1	[CH2+]C(C)CC=C		17.02	-17.02	53.98	19.35	-19.35	51.65	[CH2+]C(C)CC=C	[CH2+]C1CC(C)C1	C6H11+	C6H11+
C6H11+	C6H11+	28.27	42.73	[CH2+]C1CC(C)C1	CC1[CH+]C(C)C1		42.17	-42.17	28.83	42.73	-42.73	28.27	CC1[CH+]C(C)C1	[CH2+]C1CC(C)C1	C6H11+	C6H11+
C6H11+	C6H11+	26.37	44.63	[CH2+]C1CC(C)C1	C[CH+]CC1CC1		45.91	-45.91	25.09	44.63	-44.63	26.37	C[CH+]CC1CC1	[CH2+]C1CC(C)C1	C6H11+	C6H11+
C6H10	C6H11+	67.88	3.12	[CH2+]C1CC(C)C1	C=C1CC(C)C1	[H+]	37.58	-37.58	33.42	3.12	-3.12	67.88	C=C1CC(C)C1	[CH2+]C1CC(C)C1	C6H10	C6H11+
C6H10	C6H11+	63.87	7.13	[CH2+]C1CC(C)C1	C=C1CC(C)C1	[H+]	41.59	-41.59	29.41	7.13	-7.13	63.87	C=C1CC(C)C1	[CH2+]C1CC(C)C1	C6H10	C6H11+
C4H7+	C4H7+	60.21	10.79	[CH2+]C1CC1	[CH2+]CC=C		7.02	-7.02	63.98	10.79	-10.79	60.21	[CH2+]CC=C	[CH2+]C1CC1	C4H7+	C4H7+
C4H7+	C4H7+	57.63	13.37	[CH2+]C1CC1	[CH2+]CC=C		9.6	-9.6	61.4	13.37	-13.37	57.63	[CH2+]CC=C	[CH2+]C1CC1	C4H7+	C4H7+
C4H7+	C4H7+	24.41	46.59	[CH2+]C1CC1	C1[CH+]CC1		47.6	-47.6	23.4	46.59	-46.59	24.41	C1[CH+]CC1	[CH2+]C1CC1	C4H7+	C4H7+
C6H11+	C6H11+	54.33	16.67	[CH2+]C1CCC1C	C=CCC[CH+]C		9.91	-9.91	61.09	16.67	-16.67	54.33	C=CCC[CH+]C	[CH2+]C1CCC1C	C6H11+	C6H11+
C6H11+	C6H11+	49.51	21.49	[CH2+]C1CCC1C	C=CCC[CH+]C		14.73	-14.73	56.27	21.49	-21.49	49.51	C=CCC[CH+]C	[CH2+]C1CCC1C	C6H11+	C6H11+
C6H11+	C6H11+	28.95	42.05	[CH2+]C1CCC1C	C[C+]1CCC1C		35.7	-35.7	35.3	42.05	-42.05	28.95	C[C+]1CCC1C	[CH2+]C1CCC1C	C6H11+	C6H11+
C6H11+	C6H11+	26.48	44.52	[CH2+]C1CCC1C	C[C+]1CCC1C		38.17	-38.17	32.83	44.52	-44.52	26.48	C[C+]1CCC1C	[CH2+]C1CCC1C	C6H11+	C6H11+
C6H11+	C6H11+	53.8	17.2	[CH2+]C1CCC1C	C=CC(C)C[CH2+]		14	-14	57	17.2	-17.2	53.8	C=CC(C)C[CH2+]	[CH2+]C1CCC1C	C6H11+	C6H11+
C6H11+	C6H11+	50.65	20.35	[CH2+]C1CCC1C	C=CC(C)C[CH2+]		17.15	-17.15	53.85	20.35	-20.35	50.65	C=CC(C)C[CH2+]	[CH2+]C1CCC1C	C6H11+	C6H11+
C6H11+	C6H11+	36.04	34.96	[CH2+]C1CCC1C	CC1[CH+]CC1C		33.83	-33.83	37.17	34.96	-34.96	36.04	CC1[CH+]CC1C	[CH2+]C1CCC1C	C6H11+	C6H11+
C6H11+	C6H11+	28.33	42.67	[CH2+]C1CCC1C	CC1[CH+]CC1C		41.54	-41.54	29.46	42.67	-42.67	28.33	CC1[CH+]CC1C	[CH2+]C1CCC1C	C6H11+	C6H11+
C6H11+	C6H11+	28.57	42.43	[CH2+]C1CCC1C	[CH2+]C(C)C1CC1		47.73	-47.73	23.27	42.43	-42.43	28.57	[CH2+]C(C)C1CC1	[CH2+]C1CCC1C	C6H11+	C6H11+
C6H10	C6H11+	67.97	3.03	[CH2+]C1CCC1C	C=C1CCC1C	[H+]	35.71	-35.71	35.29	3.03	-3.03	67.97	C=C1CCC1C	[CH2+]C1CCC1C	C6H10	C6H11+
C6H10	C6H11+	63.37	7.63	[CH2+]C1CCC1C	C=C1CCC1C	[H+]	40.31	-40.31	30.69	7.63	-7.63	63.37	C=C1CCC1C	[CH2+]C1CCC1C	C6H10	C6H11+
C4H9+	C4H9+	35.27	35.73	C[C+](C)C	C[C+](C)C		42.98	-42.98	28.02	35.73	-35.73	35.27	C[C+](C)C	C[C+](C)C	C4H9+	C4H9+
C4H8	C4H9+	70.35	0.65	C[C+](C)C	C=C(C)C	[H+]	39.13	-39.13	31.87	0.65	-0.65	70.35	C=C(C)C	C[C+](C)C	C4H8	C4H9+
C6H13+	C6H13+	36.65	34.35	C[C+](C)C(C)C	[CH2+]C(C)C(C)C		41.46	-41.46	29.54	34.35	-34.35	36.65	[CH2+]C(C)C(C)C	C[C+](C)C(C)C	C6H13+	C6H13+
C6H13+	C6H13+	35.35	35.65	C[C+](C)C(C)C	[CH2+]C(C)C(C)C		42.76	-42.76	28.24	35.65	-35.65	35.35	[CH2+]C(C)C(C)C	C[C+](C)C(C)C	C6H13+	C6H13+
C5H10	C6H13+	61.73	9.27	C[C+](C)C(C)C	C\C=C(/C)C	[CH3+]	27.97	-27.97	43.03	9.27	-9.27	61.73	C\C=C(/C)C	C[C+](C)C(C)C	C5H10	C6H13+
C5H10	C6H13+	57.95	13.05	C[C+](C)C(C)C	C\C=C(/C)C	[CH3+]	31.75	-31.75	39.25	13.05	-13.05	57.95	C\C=C(/C)C	C[C+](C)C(C)C	C5H10	C6H13+
C6H12	C6H13+	69.92	1.08	C[C+](C)C(C)C	C/C(C)=C(/C)C	[H+]	36.7	-36.7	34.3	1.08	-1.08	69.92	C/C(C)=C(/C)C	C[C+](C)C(C)C	C6H12	C6H13+
C6H12	C6H13+	65.37	5.63	C[C+](C)C(C)C	C/C(C)=C(/C)C	[H+]	41.25	-41.25	29.75	5.63	-5.63	65.37	C/C(C)=C(/C)C	C[C+](C)C(C)C	C6H12	C6H13+
C6H12	C6H13+	71.25	-0.25	C[C+](C)C(C)C	C=C(C)C(C)C	[H+]	38.33	-38.33	32.67	-0.25	0.25	71.25	C=C(C)C(C)C	C[C+](C)C(C)C	C6H12	C6H13+
C6H12	C6H13+	69.88	1.12	C[C+](C)C(C)C	C=C(C)C(C)C	[H+]	39.7	-39.7	31.3	1.12	-1.12	69.88	C=C(C)C(C)C	C[C+](C)C(C)C	C6H12	C6H13+
C6H11+	C6H11+	60.51	10.49	C[C+](C)C1CC1	C/C(C)=C\C[CH2+]		6.2	-6.2	64.8	10.49	-10.49	60.51	C/C(C)=C\C[CH2+]	C[C+](C)C1CC1	C6H11+	C6H11+
C6H11+	C6H11+	56.3	14.7	C[C+](C)C1CC1	C/C(C)=C\C[CH2+]		10.41	-10.41	60.59	14.7	-14.7	56.3	C/C(C)=C\C[CH2+]	C[C+](C)C1CC1	C6H11+	C6H11+
C6H11+	C6H11+	27.82	43.18	C[C+](C)C1CC1	CC1(C)[CH+]CC1		45.32	-45.32	25.68	43.18	-43.18	27.82	CC1(C)[CH+]CC1	C[C+](C)C1CC1	C6H11+	C6H11+
C6H11+	C6H11+	35.27	35.73	C[C+](C)C1CC1	[CH2+]C(C)C1CC1		42.75	-42.75	28.25	35.73	-35.73	35.27	[CH2+]C(C)C1CC1	C[C+](C)C1CC1	C6H11+	C6H11+
C6H10	C6H11+	71.24	-0.24	C[C+](C)C1CC1	C=C(C)C1CC1	[H+]	38.52	-38.52	32.48	-0.24	0.24	71.24	C=C(C)C1CC1	C[C+](C)C1CC1	C6H10	C6H11+
C6H10	C6H11+	69.82	1.18	C[C+](C)C1CC1	C=C(C)C1CC1	[H+]	39.94	-39.94	31.06	1.18	-1.18	69.82	C=C(C)C1CC1	C[C+](C)C1CC1	C6H10	C6H11+
C6H10	C6H11+	69.97	1.03	C[C+](C)C1CC1	C/C(C)=C1/CC1	[H+]	44.14	-44.14	26.86	1.03	-1.03	69.97	C/C(C)=C1/CC1	C[C+](C)C1CC1	C6H10	C6H11+
C6H13+	C6H13+	33.35	37.65	C[C+](C)CCC	CC(C)C[CH+]C		39.56	-39.56	31.44	37.65	-37.65	33.35	CC(C)C[CH+]C	C[C+](C)CCC	C6H13+	C6H13+
C6H13+	C6H13+	32.2	38.8	C[C+](C)CCC	CC[CH+]C(C)C		41.3	-41.3	29.7	38.8	-38.8	32.2	CC[CH+]C(C)C	C[C+](C)CCC	C6H13+	C6H13+
C6H13+	C6H13+	51.46	19.54	C[C+](C)CCC	CC(C)CC[CH2+]		26.19	-26.19	44.81	19.54	-19.54	51.46	CC(C)CC[CH2+]	C[C+](C)CCC	C6H13+	C6H13+
C6H13+	C6H13+	36.53	34.47	C[C+](C)CCC	[CH2+]C(C)CCC		43.45	-43.45	27.55	34.47	-34.47	36.53	[CH2+]C(C)CCC	C[C+](C)CCC	C6H13+	C6H13+
C4H8	C6H13+	62.65	8.35	C[C+](C)CCC	C=C(C)C	[CH2+]C	25.72	-25.72	45.28	8.35	-8.35	62.65	C=C(C)C	C[C+](C)CCC	C4H8	C6H13+
C4H8	C6H13+	58.58	12.42	C[C+](C)CCC	C=C(C)C	[CH2+]C	29.79	-29.79	41.21	12.42	-12.42	58.58	C=C(C)C	C[C+](C)CCC	C4H8	C6H13+
C6H12	C6H13+	65.86	5.14	C[C+](C)CCC	C/C(C)=C\CC	[H+]	40.81	-40.81	30.19	5.14	-5.14	65.86	C/C(C)=C\CC	C[C+](C)CCC	C6H12	C6H13+
C6H12	C6H13+	70.75	0.25	C[C+](C)CCC	C=C(C)CCC	[H+]	38.53	-38.53	32.47	0.25	-0.25	70.75	C=C(C)CCC	C[C+](C)CCC	C6H12	C6H13+
C6H13+	C6H13+	32.09	38.91	C[C+](CC)CC	C[CH+]C(C)CC		41.44	-41.44	29.56	38.91	-38.91	32.09	C[CH+]C(C)CC	C[C+](CC)CC	C6H13+	C6H13+
C6H13+	C6H13+	35.43	35.57	C[C+](CC)CC	CC(C[CH2+])CC		41.56	-41.56	29.44	35.57	-35.57	35.43	CC(C[CH2+])CC	C[C+](CC)CC	C6H13+	C6H13+
C6H13+	C6H13+	37.54	33.46	C[C+](CC)CC	[CH2+]C(CC)CC		43.41	-43.41	27.59	33.46	-33.46	37.54	[CH2+]C(CC)CC	C[C+](CC)CC	C6H13+	C6H13+
C5H10	C6H13+	63.34	7.66	C[C+](CC)CC	C=C(C)CC	[CH3+]	28.24	-28.24	42.76	7.66	-7.66	63.34	C=C(C)CC	C[C+](CC)CC	C5H10	C6H13+
C5H10	C6H13+	60.45	10.55	C[C+](CC)CC	C=C(C)CC	[CH3+]	31.13	-31.13	39.87	10.55	-10.55	60.45	C=C(C)CC	C[C+](CC)CC	C5H10	C6H13+
C6H12	C6H13+	70.46	0.54	C[C+](CC)CC	C\C=C(/C)CC	[H+]	36.47	-36.47	34.53	0.54	-0.54	70.46	C\C=C(/C)CC	C[C+](CC)CC	C6H12	C6H13+
C6H12	C6H13+	68.21	2.79	C[C+](CC)CC	C\C=C(/C)CC	[H+]	38.72	-38.72	32.28	2.79	-2.79	68.21	C\C=C(/C)CC	C[C+](CC)CC	C6H12	C6H13+
C6H12	C6H13+	71.23	-0.23	C[C+](CC)CC	C=C(CC)CC	[H+]	39.22	-39.22	31.78	-0.23	0.23	71.23	C=C(CC)CC	C[C+](CC)CC	C6H12	C6H13+
C6H11+	C6H11+	39.22	31.78	C[C+]1CC(C)C1	C=C(C)C[CH+]C		28.22	-28.22	42.78	31.78	-31.78	39.22	C=C(C)C[CH+]C	C[C+]1CC(C)C1	C6H11+	C6H11+
C6H11+	C6H11+	30.07	40.93	C[C+]1CC(C)C1	CC1[CH+]C(C)C1		45.08	-45.08	25.92	40.93	-40.93	30.07	CC1[CH+]C(C)C1	C[C+]1CC(C)C1	C6H11+	C6H11+
C6H11+	C6H11+	31.86	39.14	C[C+]1CC(C)C1	[CH2+]C1CC(C)C1		43.82	-43.82	27.18	39.14	-39.14	31.86	[CH2+]C1CC(C)C1	C[C+]1CC(C)C1	C6H11+	C6H11+
C6H10	C6H11+	71.2	-0.2	C[C+]1CC(C)C1	CC1=CC(C)C1	[H+]	38.75	-38.75	32.25	-0.2	0.2	71.2	CC1=CC(C)C1	C[C+]1CC(C)C1	C6H10	C6H11+
C6H10	C6H11+	68.08	2.92	C[C+]1CC(C)C1	CC1=CC(C)C1	[H+]	41.87	-41.87	29.13	2.92	-2.92	68.08	CC1=CC(C)C1	C[C+]1CC(C)C1	C6H10	C6H11+
C6H10	C6H11+	70.4	0.6	C[C+]1CC(C)C1	C=C1CC(C)C1	[H+]	40.33	-40.33	30.67	0.6	-0.6	70.4	C=C1CC(C)C1	C[C+]1CC(C)C1	C6H10	C6H11+
C4H7+	C4H7+	30.19	40.81	C[C+]1CC1	[CH2+]C(=C)C		14.1	-14.1	56.9	40.81	-40.81	30.19	[CH2+]C(=C)C	C[C+]1CC1	C4H7+	C4H7+
C4H7+	C4H7+	22.14	48.86	C[C+]1CC1	[CH2+]C(=C)C		22.15	-22.15	48.85	48.86	-48.86	22.14	[CH2+]C(=C)C	C[C+]1CC1	C4H7+	C4H7+
C4H7+	C4H7+	22.41	48.59	C[C+]1CC1	[CH2+]C1CC1		42.92	-42.92	28.08	48.59	-48.59	22.41	[CH2+]C1CC1	C[C+]1CC1	C4H7+	C4H7+
C4H6	C4H7+	68.36	2.64	C[C+]1CC1	C=C1CC1	[H+]	42.42	-42.42	28.58	2.64	-2.64	68.36	C=C1CC1	C[C+]1CC1	C4H6	C4H7+
C7H13+	C6H11+	41.19	29.81	C[C+]1CCC1C	C\C=C(/C)CC[CH2+]		28.53	-28.53	42.47	29.81	-29.81	41.19	C\C=C(/C)CC[CH2+]	C[C+]1CCC1C	C7H13+	C6H11+
C6H11+	C6H11+	40.67	30.33	C[C+]1CCC1C	C=C(C)C([CH2+])C		30.91	-30.91	40.09	30.33	-30.33	40.67	C=C(C)C([CH2+])C	C[C+]1CCC1C	C6H11+	C6H11+
C6H11+	C6H11+	29.09	41.91	C[C+]1CCC1C	CC1[CH+]CC1C		45.49	-45.49	25.51	41.91	-41.91	29.09	CC1[CH+]CC1C	C[C+]1CCC1C	C6H11+	C6H11+
C6H11+	C6H11+	32.93	38.07	C[C+]1CCC1C	[CH2+]C1CCC1C		44.51	-44.51	26.49	38.07	-38.07	32.93	[CH2+]C1CCC1C	C[C+]1CCC1C	C6H11+	C6H11+
C5H8	C6H11+	62.82	8.18	C[C+]1CCC1C	CC1=CCC1	[CH3+]	32.26	-32.26	38.74	8.18	-8.18	62.82	CC1=CCC1	C[C+]1CCC1C	C5H8	C6H11+
C5H8	C6H11+	58.95	12.05	C[C+]1CCC1C	CC1=CCC1	[CH3+]	36.13	-36.13	34.87	12.05	-12.05	58.95	CC1=CCC1	C[C+]1CCC1C	C5H8	C6H11+
C6H10	C6H11+	69.76	1.24	C[C+]1CCC1C	CC=1CCC=1C	[H+]	36.28	-36.28	34.72	1.24	-1.24	69.76	CC=1CCC=1C	C[C+]1CCC1C	C6H10	C6H11+
C6H10	C6H11+	65.75	5.25	C[C+]1CCC1C	CC=1CCC=1C	[H+]	40.29	-40.29	30.71	5.25	-5.25	65.75	CC=1CCC=1C	C[C+]1CCC1C	C6H10	C6H11+
C6H10	C6H11+	71.19	-0.19	C[C+]1CCC1C	CC1=CCC1C	[H+]	38.67	-38.67	32.33	-0.19	0.19	71.19	CC1=CCC1C	C[C+]1CCC1C	C6H10	C6H11+
C6H10	C6H11+	68.26	2.74	C[C+]1CCC1C	CC1=CCC1C	[H+]	41.6	-41.6	29.4	2.74	-2.74	68.26	CC1=CCC1C	C[C+]1CCC1C	C6H10	C6H11+
C6H10	C6H11+	71.23	-0.23	C[C+]1CCC1C	C=C1CCC1C	[H+]	38.82	-38.82	32.18	-0.23	0.23	71.23	C=C1CCC1C	C[C+]1CCC1C	C6H10	C6H11+
C6H10	C6H11+	70.11	0.89	C[C+]1CCC1C	C=C1CCC1C	[H+]	39.94	-39.94	31.06	0.89	-0.89	70.11	C=C1CCC1C	C[C+]1CCC1C	C6H10	C6H11+
C6H11+	C6H11+	32.69	38.31	C[C+]1CCCC1	CC1[CH+]CCC1		41.69	-41.69	29.31	38.31	-38.31	32.69	CC1[CH+]CCC1	C[C+]1CCCC1	C6H11+	C6H11+
C6H11+	C6H11+	35.1	35.9	C[C+]1CCCC1	[CH2+]C1CCCC1		44.65	-44.65	26.35	35.9	-35.9	35.1	[CH2+]C1CCCC1	C[C+]1CCCC1	C6H11+	C6H11+
C6H11+	C6H11+	55.29	15.71	C[C+]1CCCC1	C=C(C)CC[CH2+]		33.68	-33.68	37.32	15.71	-15.71	55.29	C=C(C)CC[CH2+]	C[C+]1CCCC1	C6H11+	C6H11+
C6H10	C6H11+	70.57	0.43	C[C+]1CCCC1	CC1=CCCC1	[H+]	36.63	-36.63	34.37	0.43	-0.43	70.57	CC1=CCCC1	C[C+]1CCCC1	C6H10	C6H11+
C6H10	C6H11+	68.86	2.14	C[C+]1CCCC1	CC1=CCCC1	[H+]	38.34	-38.34	32.66	2.14	-2.14	68.86	CC1=CCCC1	C[C+]1CCCC1	C6H10	C6H11+
C6H10	C6H11+	71.24	-0.24	C[C+]1CCCC1	C=C1CCCC1	[H+]	40.07	-40.07	30.93	-0.24	0.24	71.24	C=C1CCCC1	C[C+]1CCCC1	C6H10	C6H11+
C6H13+	C6H13+	31.83	39.17	C[CH+]C(C)(C)C	CC(C)(C)C[CH2+]		41.96	-41.96	29.04	39.17	-39.17	31.83	CC(C)(C)C[CH2+]	C[CH+]C(C)(C)C	C6H13+	C6H13+
C6H13+	C6H13+	34.66	36.34	C[CH+]C(C)(C)C	[CH2+]C(C)(C)CC		40.25	-40.25	30.75	36.34	-36.34	34.66	[CH2+]C(C)(C)CC	C[CH+]C(C)(C)C	C6H13+	C6H13+
C5H10	C6H13+	58.9	12.1	C[CH+]C(C)(C)C	C\C=C(/C)C	[CH3+]	28.16	-28.16	42.84	12.1	-12.1	58.9	C\C=C(/C)C	C[CH+]C(C)(C)C	C5H10	C6H13+
C5H10	C6H13+	54.44	16.56	C[CH+]C(C)(C)C	C\C=C(/C)C	[CH3+]	32.62	-32.62	38.38	16.56	-16.56	54.44	C\C=C(/C)C	C[CH+]C(C)(C)C	C5H10	C6H13+
C5H10	C6H13+	69.26	1.74	C[CH+]C(C)(C)C	C=CC(C)C	[H+]	39.22	-39.22	31.78	1.74	-1.74	69.26	C=CC(C)C	C[CH+]C(C)(C)C	C5H10	C6H13+
C6H13+	C6H13+	28.09	42.91	C[CH+]C(C)CC	C[C+](CC)CC		39.37	-39.37	31.63	42.91	-42.91	28.09	C[C+](CC)CC	C[CH+]C(C)CC	C6H13+	C6H13+
C6H13+	C6H13+	49.89	21.11	C[CH+]C(C)CC	CC(C[CH2+])CC		24.72	-24.72	46.28	21.11	-21.11	49.89	CC(C[CH2+])CC	C[CH+]C(C)CC	C6H13+	C6H13+
C6H13+	C6H13+	33.97	37.03	C[CH+]C(C)CC	[CH2+]C(CC)CC		40.93	-40.93	30.07	37.03	-37.03	33.97	[CH2+]C(CC)CC	C[CH+]C(C)CC	C6H13+	C6H13+
C4H8	C6H13+	60.31	10.69	C[CH+]C(C)CC	C\C=C/C	[CH2+]C	25.77	-25.77	45.23	10.69	-10.69	60.31	C\C=C/C	C[CH+]C(C)CC	C4H8	C6H13+
C4H8	C6H13+	55.26	15.74	C[CH+]C(C)CC	C\C=C/C	[CH2+]C	30.82	-30.82	40.18	15.74	-15.74	55.26	C\C=C/C	C[CH+]C(C)CC	C4H8	C6H13+
C5H10	C6H13+	61.14	9.86	C[CH+]C(C)CC	C\C=C/CC	[CH3+]	28.1	-28.1	42.9	9.86	-9.86	61.14	C\C=C/CC	C[CH+]C(C)CC	C5H10	C6H13+
C5H10	C6H13+	58.83	12.17	C[CH+]C(C)CC	C\C=C/CC	[CH3+]	30.41	-30.41	40.59	12.17	-12.17	58.83	C\C=C/CC	C[CH+]C(C)CC	C5H10	C6H13+
C6H12	C6H13+	68.05	2.95	C[CH+]C(C)CC	C\C=C(/C)CC	[H+]	35.52	-35.52	35.48	2.95	-2.95	68.05	C\C=C(/C)CC	C[CH+]C(C)CC	C6H12	C6H13+
C6H12	C6H13+	61.85	9.15	C[CH+]C(C)CC	C\C=C(/C)CC	[H+]	41.72	-41.72	29.28	9.15	-9.15	61.85	C\C=C(/C)CC	C[CH+]C(C)CC	C6H12	C6H13+
C6H12	C6H13+	70.95	0.05	C[CH+]C(C)CC	C=CC(C)CC	[H+]	36.27	-36.27	34.73	0.05	-0.05	70.95	C=CC(C)CC	C[CH+]C(C)CC	C6H12	C6H13+
C6H12	C6H13+	67.33	3.67	C[CH+]C(C)CC	C=CC(C)CC	[H+]	39.89	-39.89	31.11	3.67	-3.67	67.33	C=CC(C)CC	C[CH+]C(C)CC	C6H12	C6H13+
C6H11+	C6H11+	58.74	12.26	C[CH+]C1(C)CC1	C\C=C(/C)C[CH2+]		7.95	-7.95	63.05	12.26	-12.26	58.74	C\C=C(/C)C[CH2+]	C[CH+]C1(C)CC1	C6H11+	C6H11+
C6H11+	C6H11+	23.8	47.2	C[CH+]C1(C)CC1	C[C+]1CCC1C		44.63	-44.63	26.37	47.2	-47.2	23.8	C[C+]1CCC1C	C[CH+]C1(C)CC1	C6H11+	C6H11+
C6H11+	C6H11+	29.75	41.25	C[CH+]C1(C)CC1	[CH2+]C1(CC)CC1		43.95	-43.95	27.05	41.25	-41.25	29.75	[CH2+]C1(CC)CC1	C[CH+]C1(C)CC1	C6H11+	C6H11+
C6H11+	C6H11+	33.96	37.04	C[CH+]C1(C)CC1	CC1(C[CH2+])CC1		43.43	-43.43	27.57	37.04	-37.04	33.96	CC1(C[CH2+])CC1	C[CH+]C1(C)CC1	C6H11+	C6H11+
C5H8	C6H11+	60.76	10.24	C[CH+]C1(C)CC1	C\C=C1/CC1	[CH3+]	39.76	-39.76	31.24	10.24	-10.24	60.76	C\C=C1/CC1	C[CH+]C1(C)CC1	C5H8	C6H11+
C5H8	C6H11+	57.07	13.93	C[CH+]C1(C)CC1	C\C=C1/CC1	[CH3+]	43.45	-43.45	27.55	13.93	-13.93	57.07	C\C=C1/CC1	C[CH+]C1(C)CC1	C5H8	C6H11+
C6H10	C6H11+	70.75	0.25	C[CH+]C1(C)CC1	C=CC1(C)CC1	[H+]	39.94	-39.94	31.06	0.25	-0.25	70.75	C=CC1(C)CC1	C[CH+]C1(C)CC1	C6H10	C6H11+
C4H9+	C4H9+	32.48	38.52	C[CH+]CC	CCC[CH2+]		42.14	-42.14	28.86	38.52	-38.52	32.48	CCC[CH2+]	C[CH+]CC	C4H9+	C4H9+
C3H6	C4H9+	63.24	7.76	C[CH+]CC	C=CC	[CH3+]	28.63	-28.63	42.37	7.76	-7.76	63.24	C=CC	C[CH+]CC	C3H6	C4H9+
C4H8	C4H9+	69.97	1.03	C[CH+]CC	C\C=C\C	[H+]	35.15	-35.15	35.85	1.03	-1.03	69.97	C\C=C\C	C[CH+]CC	C4H8	C4H9+
C4H8	C4H9+	65.51	5.49	C[CH+]CC	C\C=C\C	[H+]	39.61	-39.61	31.39	5.49	-5.49	65.51	C\C=C\C	C[CH+]CC	C4H8	C4H9+
C4H8	C4H9+	69.21	1.79	C[CH+]CC	C=CCC	[H+]	40.09	-40.09	30.91	1.79	-1.79	69.21	C=CCC	C[CH+]CC	C4H8	C4H9+
C6H13+	C6H13+	30.41	40.59	C[CH+]CCCC	CCC[CH+]CC		40.56	-40.56	30.44	40.59	-40.59	30.41	CCC[CH+]CC	C[CH+]CCCC	C6H13+	C6H13+
C6H13+	C6H13+	57.44	13.56	C[CH+]CCCC	CCCCC[CH2+]		17.97	-17.97	53.03	13.56	-13.56	57.44	CCCCC[CH2+]	C[CH+]CCCC	C6H13+	C6H13+
C6H13+	C6H13+	33.06	37.94	C[CH+]CCCC	CCCCC[CH2+]		42.35	-42.35	28.65	37.94	-37.94	33.06	CCCCC[CH2+]	C[CH+]CCCC	C6H13+	C6H13+
C3H6	C6H13+	62.02	8.98	C[CH+]CCCC	C=CC	[CH2+]CC	26.6	-26.6	44.4	8.98	-8.98	62.02	C=CC	C[CH+]CCCC	C3H6	C6H13+
C3H6	C6H13+	57.79	13.21	C[CH+]CCCC	C=CC	[CH2+]CC	30.83	-30.83	40.17	13.21	-13.21	57.79	C=CC	C[CH+]CCCC	C3H6	C6H13+
C6H12	C6H13+	66.19	4.81	C[CH+]CCCC	CCC\C=C\C	[H+]	40.37	-40.37	30.63	4.81	-4.81	66.19	CCC\C=C\C	C[CH+]CCCC	C6H12	C6H13+
C6H12	C6H13+	69.51	1.49	C[CH+]CCCC	C=CCCCC	[H+]	39.78	-39.78	31.22	1.49	-1.49	69.51	C=CCCCC	C[CH+]CCCC	C6H12	C6H13+
C4H7+	C4H7+	38.28	32.72	C1[CH+]CC1	[CH2+]CC=C		28.76	-28.76	42.24	32.72	-32.72	38.28	[CH2+]CC=C	C1[CH+]CC1	C4H7+	C4H7+
C4H7+	C4H7+	23.45	47.55	C1[CH+]CC1	[CH2+]C1CC1		46.57	-46.57	24.43	47.55	-47.55	23.45	[CH2+]C1CC1	C1[CH+]CC1	C4H7+	C4H7+
C4H6	C4H7+	70.36	0.64	C1[CH+]CC1	C1=CCC1	[H+]	39.94	-39.94	31.06	0.64	-0.64	70.36	C1=CCC1	C1[CH+]CC1	C4H6	C4H7+
C4H6	C4H7+	68.09	2.91	C1[CH+]CC1	C1=CCC1	[H+]	42.21	-42.21	28.79	2.91	-2.91	68.09	C1=CCC1	C1[CH+]CC1	C4H6	C4H7+
C6H10	C6H11+	70.47	0.53	C1C[CH+]CCC1	C1C=CCCC1	[H+]	35.49	-35.49	35.51	0.53	-0.53	70.47	C1C=CCCC1	C1C[CH+]CCC1	C6H10	C6H11+
C6H10	C6H11+	69.38	1.62	C1C[CH+]CCC1	C1C=CCCC1	[H+]	36.58	-36.58	34.42	1.62	-1.62	69.38	C1C=CCCC1	C1C[CH+]CCC1	C6H10	C6H11+
C6H10	C6H11+	67.43	3.57	C1C[CH+]CCC1	C1C=CCCC1	[H+]	38.53	-38.53	32.47	3.57	-3.57	67.43	C1C=CCCC1	C1C[CH+]CCC1	C6H10	C6H11+
C6H13+	C6H13+	29.09	41.91	CC(C)(C)C[CH2+]	C[CH+]C(C)(C)C		39.11	-39.11	31.89	41.91	-41.91	29.09	C[CH+]C(C)(C)C	CC(C)(C)C[CH2+]	C6H13+	C6H13+
C6H13+	C6H13+	48.61	22.39	CC(C)(C)C[CH2+]	[CH2+]C(C)(C)CC		23.48	-23.48	47.52	22.39	-22.39	48.61	[CH2+]C(C)(C)CC	CC(C)(C)C[CH2+]	C6H13+	C6H13+
C4H9+	C6H13+	62.06	8.94	CC(C)(C)C[CH2+]	C[C+](C)C	C=C	20.39	-20.39	50.61	8.94	-8.94	62.06	C[C+](C)C	CC(C)(C)C[CH2+]	C4H9+	C6H13+
C4H9+	C6H13+	55.23	15.77	CC(C)(C)C[CH2+]	C[C+](C)C	C=C	27.22	-27.22	43.78	15.77	-15.77	55.23	C[C+](C)C	CC(C)(C)C[CH2+]	C4H9+	C6H13+
C6H12	C6H13+	68.32	2.68	CC(C)(C)C[CH2+]	C=CC(C)(C)C	[H+]	37.24	-37.24	33.76	2.68	-2.68	68.32	C=CC(C)(C)C	CC(C)(C)C[CH2+]	C6H12	C6H13+
C6H12	C6H13+	64.77	6.23	CC(C)(C)C[CH2+]	C=CC(C)(C)C	[H+]	40.79	-40.79	30.21	6.23	-6.23	64.77	C=CC(C)(C)C	CC(C)(C)C[CH2+]	C6H12	C6H13+
C6H11+	C6H11+	23.01	47.99	CC(C)[C+]1CC1	[CH2+]C(=C)C(C)C		21.72	-21.72	49.28	47.99	-47.99	23.01	[CH2+]C(=C)C(C)C	CC(C)[C+]1CC1	C6H11+	C6H11+
C6H11+	C6H11+	21.33	49.67	CC(C)[C+]1CC1	C[C+](C)C1CC1		38.22	-38.22	32.78	49.67	-49.67	21.33	C[C+](C)C1CC1	CC(C)[C+]1CC1	C6H11+	C6H11+
C6H11+	C6H11+	29.43	41.57	CC(C)[C+]1CC1	[CH2+]C(C)C1CC1		38.02	-38.02	32.98	41.57	-41.57	29.43	[CH2+]C(C)C1CC1	CC(C)[C+]1CC1	C6H11+	C6H11+
C5H8	C6H11+	61.5	9.5	CC(C)[C+]1CC1	C\C=C1/CC1	[CH3+]	29.08	-29.08	41.92	9.5	-9.5	61.5	C\C=C1/CC1	CC(C)[C+]1CC1	C5H8	C6H11+
C5H8	C6H11+	56.23	14.77	CC(C)[C+]1CC1	C\C=C1/CC1	[CH3+]	34.35	-34.35	36.65	14.77	-14.77	56.23	C\C=C1/CC1	CC(C)[C+]1CC1	C5H8	C6H11+
C6H10	C6H11+	63.62	7.38	CC(C)[C+]1CC1	C/C(C)=C1\CC1	[H+]	39.95	-39.95	31.05	7.38	-7.38	63.62	C/C(C)=C1\CC1	CC(C)[C+]1CC1	C6H10	C6H11+
C6H13+	C6H13+	31.43	39.57	CC(C)C[CH+]C	C[C+](C)CCC		37.74	-37.74	33.26	39.57	-39.57	31.43	C[C+](C)CCC	CC(C)C[CH+]C	C6H13+	C6H13+
C6H13+	C6H13+	31.48	39.52	CC(C)C[CH+]C	CC[CH+]C(C)C		40.14	-40.14	30.86	39.52	-39.52	31.48	CC[CH+]C(C)C	CC(C)C[CH+]C	C6H13+	C6H13+
C6H13+	C6H13+	50.11	20.89	CC(C)C[CH+]C	[CH2+]C(C)CCC		25.28	-25.28	45.72	20.89	-20.89	50.11	[CH2+]C(C)CCC	CC(C)C[CH+]C	C6H13+	C6H13+
C6H13+	C6H13+	33.47	37.53	CC(C)C[CH+]C	CC(C)CC[CH2+]		43.29	-43.29	27.71	37.53	-37.53	33.47	CC(C)CC[CH2+]	CC(C)C[CH+]C	C6H13+	C6H13+
C3H7+	C6H13+	61.93	9.07	CC(C)C[CH+]C	C[CH+]C	C=CC	24.41	-24.41	46.59	9.07	-9.07	61.93	C[CH+]C	CC(C)C[CH+]C	C3H7+	C6H13+
C3H7+	C6H13+	55.98	15.02	CC(C)C[CH+]C	C[CH+]C	C=CC	30.36	-30.36	40.64	15.02	-15.02	55.98	C[CH+]C	CC(C)C[CH+]C	C3H7+	C6H13+
C6H12	C6H13+	70.94	0.06	CC(C)C[CH+]C	C\C=C/C(C)C	[H+]	36.37	-36.37	34.63	0.06	-0.06	70.94	C\C=C/C(C)C	CC(C)C[CH+]C	C6H12	C6H13+
C6H12	C6H13+	65.94	5.06	CC(C)C[CH+]C	C\C=C/C(C)C	[H+]	41.37	-41.37	29.63	5.06	-5.06	65.94	C\C=C/C(C)C	CC(C)C[CH+]C	C6H12	C6H13+
C6H12	C6H13+	70.9	0.1	CC(C)C[CH+]C	CC(C)CC=C	[H+]	40.23	-40.23	30.77	0.1	-0.1	70.9	CC(C)CC=C	CC(C)C[CH+]C	C6H12	C6H13+
C6H11+	C6H11+	20.28	50.72	CC(C)C1[CH+]C1	[CH2+]\C=C/C(C)C		18.37	-18.37	52.63	50.72	-50.72	20.28	[CH2+]\C=C/C(C)C	CC(C)C1[CH+]C1	C6H11+	C6H11+
C6H11+	C6H11+	19.19	51.81	CC(C)C1[CH+]C1	[CH2+]\C=C/C(C)C		19.46	-19.46	51.54	51.81	-51.81	19.19	[CH2+]\C=C/C(C)C	CC(C)C1[CH+]C1	C6H11+	C6H11+
C6H11+	C6H11+	22.58	48.42	CC(C)C1[CH+]C1	C[C+](C)C1CC1		33.5	-33.5	37.5	48.42	-48.42	22.58	C[C+](C)C1CC1	CC(C)C1[CH+]C1	C6H11+	C6H11+
C6H11+	C6H11+	45.69	25.31	CC(C)C1[CH+]C1	[CH2+]C(C)C1CC1		19.15	-19.15	51.85	25.31	-25.31	45.69	[CH2+]C(C)C1CC1	CC(C)C1[CH+]C1	C6H11+	C6H11+
C6H11+	C6H11+	23.17	47.83	CC(C)C1[CH+]C1	CC(C)[C+]1CC1		43.44	-43.44	27.56	47.83	-47.83	23.17	CC(C)[C+]1CC1	CC(C)C1[CH+]C1	C6H11+	C6H11+
C3H7+	C6H11+	64.82	6.18	CC(C)C1[CH+]C1	C[CH+]C	C1=CC1	36.86	-36.86	34.14	6.18	-6.18	64.82	C[CH+]C	CC(C)C1[CH+]C1	C3H7+	C6H11+
C3H7+	C6H11+	56.81	14.19	CC(C)C1[CH+]C1	C[CH+]C	C1=CC1	44.87	-44.87	26.13	14.19	-14.19	56.81	C[CH+]C	CC(C)C1[CH+]C1	C3H7+	C6H11+
C6H13+	C6H13+	44.84	26.16	CC(C)CC[CH2+]	C[C+](C)CCC		19.54	-19.54	51.46	26.16	-26.16	44.84	C[C+](C)CCC	CC(C)CC[CH2+]	C6H13+	C6H13+
C6H13+	C6H13+	28.78	42.22	CC(C)CC[CH2+]	CC(C)C[CH+]C		37.97	-37.97	33.03	42.22	-42.22	28.78	CC(C)C[CH+]C	CC(C)CC[CH2+]	C6H13+	C6H13+
C6H13+	C6H13+	29.77	41.23	CC(C)CC[CH2+]	CC[CH+]C(C)C		37.06	-37.06	33.94	41.23	-41.23	29.77	CC[CH+]C(C)C	CC(C)CC[CH2+]	C6H13+	C6H13+
C6H13+	C6H13+	55.95	15.05	CC(C)CC[CH2+]	[CH2+]C(C)CCC		17.37	-17.37	53.63	15.05	-15.05	55.95	[CH2+]C(C)CCC	CC(C)CC[CH2+]	C6H13+	C6H13+
C4H9+	C6H13+	62.04	8.96	CC(C)CC[CH2+]	[CH2+]C(C)C	C=C	26.71	-26.71	44.29	8.96	-8.96	62.04	[CH2+]C(C)C	CC(C)CC[CH2+]	C4H9+	C6H13+
C4H9+	C6H13+	57.59	13.41	CC(C)CC[CH2+]	[CH2+]C(C)C	C=C	31.16	-31.16	39.84	13.41	-13.41	57.59	[CH2+]C(C)C	CC(C)CC[CH2+]	C4H9+	C6H13+
C6H12	C6H13+	68.86	2.14	CC(C)CC[CH2+]	C=CC(C)(C)C	[H+]	36.12	-36.12	34.88	2.14	-2.14	68.86	C=CC(C)(C)C	CC(C)CC[CH2+]	C6H12	C6H13+
C6H12	C6H13+	66.31	4.69	CC(C)CC[CH2+]	C=CC(C)(C)C	[H+]	38.67	-38.67	32.33	4.69	-4.69	66.31	C=CC(C)(C)C	CC(C)CC[CH2+]	C6H12	C6H13+
C6H13+	C6H13+	29.56	41.44	CC(C[CH2+])CC	C[C+](CC)CC		34.59	-34.59	36.41	41.44	-41.44	29.56	C[C+](CC)CC	CC(C[CH2+])CC	C6H13+	C6H13+
C6H13+	C6H13+	48.59	22.41	CC(C[CH2+])CC	C[CH+]C(C)CC		19.44	-19.44	51.56	22.41	-22.41	48.59	C[CH+]C(C)CC	CC(C[CH2+])CC	C6H13+	C6H13+
C6H13+	C6H13+	28.97	42.03	CC(C[CH2+])CC	C[CH+]C(C)CC		39.06	-39.06	31.94	42.03	-42.03	28.97	C[CH+]C(C)CC	CC(C[CH2+])CC	C6H13+	C6H13+
C6H13+	C6H13+	48.89	22.11	CC(C[CH2+])CC	[CH2+]C(CC)CC		22.14	-22.14	48.86	22.11	-22.11	48.89	[CH2+]C(CC)CC	CC(C[CH2+])CC	C6H13+	C6H13+
C6H13+	C6H13+	47.52	23.48	CC(C[CH2+])CC	[CH2+]C(CC)CC		23.51	-23.51	47.49	23.48	-23.48	47.52	[CH2+]C(CC)CC	CC(C[CH2+])CC	C6H13+	C6H13+
C4H9+	C6H13+	61.57	9.43	CC(C[CH2+])CC	C[CH+]CC	C=C	22.78	-22.78	48.22	9.43	-9.43	61.57	C[CH+]CC	CC(C[CH2+])CC	C4H9+	C6H13+
C4H9+	C6H13+	55.7	15.3	CC(C[CH2+])CC	C[CH+]CC	C=C	28.65	-28.65	42.35	15.3	-15.3	55.7	C[CH+]CC	CC(C[CH2+])CC	C4H9+	C6H13+
C6H12	C6H13+	66.01	4.99	CC(C[CH2+])CC	C=CC(C)CC	[H+]	39.41	-39.41	31.59	4.99	-4.99	66.01	C=CC(C)CC	CC(C[CH2+])CC	C6H12	C6H13+
C6H13+	C6H13+	29.45	41.55	CC[CH+]C(C)C	C[C+](C)CCC		36.42	-36.42	34.58	41.55	-41.55	29.45	C[C+](C)CCC	CC[CH+]C(C)C	C6H13+	C6H13+
C6H13+	C6H13+	30.52	40.48	CC[CH+]C(C)C	CC(C)C[CH+]C		38.66	-38.66	32.34	40.48	-40.48	30.52	CC(C)C[CH+]C	CC[CH+]C(C)C	C6H13+	C6H13+
C6H13+	C6H13+	34.53	36.47	CC[CH+]C(C)C	[CH2+]C(C)CCC		37.9	-37.9	33.1	36.47	-36.47	34.53	[CH2+]C(C)CCC	CC[CH+]C(C)C	C6H13+	C6H13+
C6H13+	C6H13+	35.99	35.01	CC[CH+]C(C)C	CC(C)CC[CH2+]		38.87	-38.87	32.13	35.01	-35.01	35.99	CC(C)CC[CH2+]	CC[CH+]C(C)C	C6H13+	C6H13+
C6H13+	C6H13+	34.57	36.43	CC[CH+]C(C)C	CC(C)CC[CH2+]		40.29	-40.29	30.71	36.43	-36.43	34.57	CC(C)CC[CH2+]	CC[CH+]C(C)C	C6H13+	C6H13+
C5H10	C6H13+	60.69	10.31	CC[CH+]C(C)C	C\C=C\CC	[CH3+]	26.12	-26.12	44.88	10.31	-10.31	60.69	C\C=C\CC	CC[CH+]C(C)C	C5H10	C6H13+
C5H10	C6H13+	57.03	13.97	CC[CH+]C(C)C	C\C=C\CC	[CH3+]	29.78	-29.78	41.22	13.97	-13.97	57.03	C\C=C\CC	CC[CH+]C(C)C	C5H10	C6H13+
C5H10	C6H13+	63.04	7.96	CC[CH+]C(C)C	C=CC(C)C	[CH3+]	26.47	-26.47	44.53	7.96	-7.96	63.04	C=CC(C)C	CC[CH+]C(C)C	C5H10	C6H13+
C5H10	C6H13+	58.67	12.33	CC[CH+]C(C)C	C=CC(C)C	[CH3+]	30.84	-30.84	40.16	12.33	-12.33	58.67	C=CC(C)C	CC[CH+]C(C)C	C5H10	C6H13+
C6H12	C6H13+	64.6	6.4	CC[CH+]C(C)C	C/C(C)=C\CC	[H+]	37.26	-37.26	33.74	6.4	-6.4	64.6	C/C(C)=C\CC	CC[CH+]C(C)C	C6H12	C6H13+
C6H12	C6H13+	67.09	3.91	CC[CH+]C(C)C	C\C=C/C(C)C	[H+]	41.21	-41.21	29.79	3.91	-3.91	67.09	C\C=C/C(C)C	CC[CH+]C(C)C	C6H12	C6H13+
C6H11+	C6H11+	1.53	69.47	CC1(C[CH2+])CC1	C[C+]1CCCC1		43.53	-43.53	27.47	69.47	-69.47	1.53	C[C+]1CCCC1	CC1(C[CH2+])CC1	C6H11+	C6H11+
C6H11+	C6H11+	27.58	43.42	CC1(C[CH2+])CC1	C[CH+]C1(C)CC1		38.12	-38.12	32.88	43.42	-43.42	27.58	C[CH+]C1(C)CC1	CC1(C[CH2+])CC1	C6H11+	C6H11+
C6H11+	C6H11+	44.13	26.87	CC1(C[CH2+])CC1	[CH2+]C1(CC)CC1		24.3	-24.3	46.7	26.87	-26.87	44.13	[CH2+]C1(CC)CC1	CC1(C[CH2+])CC1	C6H11+	C6H11+
C6H11+	C6H11+	52.38	18.62	CC1(C[CH2+])CC1	CC1(CC)[CH+]C1		26.22	-26.22	44.78	18.62	-18.62	52.38	CC1(CC)[CH+]C1	CC1(C[CH2+])CC1	C6H11+	C6H11+
C4H7+	C6H11+	65.53	5.47	CC1(C[CH2+])CC1	C[C+]1CC1	C=C	28.63	-28.63	42.37	5.47	-5.47	65.53	C[C+]1CC1	CC1(C[CH2+])CC1	C4H7+	C6H11+
C4H7+	C6H11+	58.5	12.5	CC1(C[CH2+])CC1	C[C+]1CC1	C=C	35.66	-35.66	35.34	12.5	-12.5	58.5	C[C+]1CC1	CC1(C[CH2+])CC1	C4H7+	C6H11+
C6H10	C6H11+	68.81	2.19	CC1(C[CH2+])CC1	C=CC1(C)CC1	[H+]	35.27	-35.27	35.73	2.19	-2.19	68.81	C=CC1(C)CC1	CC1(C[CH2+])CC1	C6H10	C6H11+
C6H10	C6H11+	64.52	6.48	CC1(C[CH2+])CC1	C=CC1(C)CC2	[H+]	39.56	-39.56	31.44	6.48	-6.48	64.52	C=CC1(C)CC2	CC1(C[CH2+])CC1	C6H10	C6H11+
C6H11+	C6H11+	19.03	51.97	CC1(CC)[CH+]C1	C=C[C+](C)CC		18.78	-18.78	52.22	51.97	-51.97	19.03	C=C[C+](C)CC	CC1(CC)[CH+]C1	C6H11+	C6H11+
C6H11+	C6H11+	17.2	53.8	CC1(CC)[CH+]C1	C=C[C+](C)CC		20.61	-20.61	50.39	53.8	-53.8	17.2	C=C[C+](C)CC	CC1(CC)[CH+]C1	C6H11+	C6H11+
C6H11+	C6H11+	10.73	60.27	CC1(CC)[CH+]C1	C=C[C+](C)CC		27.08	-27.08	43.92	60.27	-60.27	10.73	C=C[C+](C)CC	CC1(CC)[CH+]C1	C6H11+	C6H11+
C6H11+	C6H11+	23.73	47.27	CC1(CC)[CH+]C1	C[CH+]C1(C)CC1		35.26	-35.26	35.74	47.27	-47.27	23.73	C[CH+]C1(C)CC1	CC1(CC)[CH+]C1	C6H11+	C6H11+
C6H11+	C6H11+	24.16	46.84	CC1(CC)[CH+]C1	[CH2+]C1(CC)CC1		37.29	-37.29	33.71	46.84	-46.84	24.16	[CH2+]C1(CC)CC1	CC1(CC)[CH+]C1	C6H11+	C6H11+
C6H11+	C6H11+	45.88	25.12	CC1(CC)[CH+]C1	CC1(C[CH2+])CC1		19.26	-19.26	51.74	25.12	-25.12	45.88	CC1(C[CH2+])CC1	CC1(CC)[CH+]C1	C6H11+	C6H11+
C4H6	C6H11+	61.73	9.27	CC1(CC)[CH+]C1	CC1=CC1	[CH2+]C	38.55	-38.55	32.45	9.27	-9.27	61.73	CC1=CC1	CC1(CC)[CH+]C1	C4H6	C6H11+
C4H6	C6H11+	53.63	17.37	CC1(CC)[CH+]C1	CC1=CC1	[CH2+]C	46.65	-46.65	24.35	17.37	-17.37	53.63	CC1=CC1	CC1(CC)[CH+]C1	C4H6	C6H11+
C5H8	C6H11+	61.17	9.83	CC1(CC)[CH+]C1	CCC1=CC1	[CH3+]	42.33	-42.33	28.67	9.83	-9.83	61.17	CCC1=CC1	CC1(CC)[CH+]C1	C5H8	C6H11+
C6H11+	C6H11+	29.71	41.29	CC1[CH+]C(C)C1	C[C+]1CC(C)C1		37.14	-37.14	33.86	41.29	-41.29	29.71	C[C+]1CC(C)C1	CC1[CH+]C(C)C1	C6H11+	C6H11+
C6H11+	C6H11+	25.93	45.07	CC1[CH+]C(C)C1	C[C+]1CC(C)C1		40.92	-40.92	30.08	45.07	-45.07	25.93	C[C+]1CC(C)C1	CC1[CH+]C(C)C1	C6H11+	C6H11+
C6H11+	C6H11+	40.85	30.15	CC1[CH+]C(C)C1	[CH2+]C(C)\C=C\C		26.45	-26.45	44.55	30.15	-30.15	40.85	[CH2+]C(C)\C=C\C	CC1[CH+]C(C)C1	C6H11+	C6H11+
C6H11+	C6H11+	26.74	44.26	CC1[CH+]C(C)C1	C[CH+]C1CC1C		44.51	-44.51	26.49	44.26	-44.26	26.74	C[CH+]C1CC1C	CC1[CH+]C(C)C1	C6H11+	C6H11+
C6H11+	C6H11+	25.52	45.48	CC1[CH+]C(C)C1	C[CH+]C1CC1C		45.73	-45.73	25.27	45.48	-45.48	25.52	C[CH+]C1CC1C	CC1[CH+]C(C)C1	C6H11+	C6H11+
C6H11+	C6H11+	28.8	42.2	CC1[CH+]C(C)C1	[CH2+]C1CC(C)C1		42.75	-42.75	28.25	42.2	-42.2	28.8	[CH2+]C1CC(C)C1	CC1[CH+]C(C)C1	C6H11+	C6H11+
C5H8	C6H11+	62.22	8.78	CC1[CH+]C(C)C1	CC1C=CC1	[CH3+]	33.22	-33.22	37.78	8.78	-8.78	62.22	CC1C=CC1	CC1[CH+]C(C)C1	C5H8	C6H11+
C5H8	C6H11+	58.7	12.3	CC1[CH+]C(C)C1	CC1C=CC1	[CH3+]	36.74	-36.74	34.26	12.3	-12.3	58.7	CC1C=CC1	CC1[CH+]C(C)C1	C5H8	C6H11+
C6H10	C6H11+	64.78	6.22	CC1[CH+]C(C)C1	CC1=CC(C)C1	[H+]	41	-41	30	6.22	-6.22	64.78	CC1=CC(C)C1	CC1[CH+]C(C)C1	C6H10	C6H11+
C4H7+	C4H7+	19.83	51.17	CC1[CH+]C1	[CH2+]\C=C\C		18.61	-18.61	52.39	51.17	-51.17	19.83	[CH2+]\C=C\C	CC1[CH+]C1	C4H7+	C4H7+
C4H7+	C4H7+	17.55	53.45	CC1[CH+]C1	[CH2+]\C=C\C		20.89	-20.89	50.11	53.45	-53.45	17.55	[CH2+]\C=C\C	CC1[CH+]C1	C4H7+	C4H7+
C4H7+	C4H7+	15.56	55.44	CC1[CH+]C1	[CH2+]\C=C\C		22.88	-22.88	48.12	55.44	-55.44	15.56	[CH2+]\C=C\C	CC1[CH+]C1	C4H7+	C4H7+
C4H7+	C4H7+	22.31	48.69	CC1[CH+]C1	[CH2+]C1CC1		39.03	-39.03	31.97	48.69	-48.69	22.31	[CH2+]C1CC1	CC1[CH+]C1	C4H7+	C4H7+
C4H7+	C4H7+	22.77	48.23	CC1[CH+]C1	C[C+]1CC1		44.23	-44.23	26.77	48.23	-48.23	22.77	C[C+]1CC1	CC1[CH+]C1	C4H7+	C4H7+
C3H4	C4H7+	65.09	5.91	CC1[CH+]C1	C1=CC1	[CH3+]	43.92	-43.92	27.08	5.91	-5.91	65.09	C1=CC1	CC1[CH+]C1	C3H4	C4H7+
C6H11+	C6H11+	38.23	32.77	CC1[CH+]CC1C	C[CH+]C\C=C\C		24.19	-24.19	46.81	32.77	-32.77	38.23	C[CH+]C\C=C\C	CC1[CH+]CC1C	C6H11+	C6H11+
C6H11+	C6H11+	29.76	41.24	CC1[CH+]CC1C	C[C+]1CCC1C		35.97	-35.97	35.03	41.24	-41.24	29.76	C[C+]1CCC1C	CC1[CH+]CC1C	C6H11+	C6H11+
C6H11+	C6H11+	25.56	45.44	CC1[CH+]CC1C	C[C+]1CCC1C		40.17	-40.17	30.83	45.44	-45.44	25.56	C[C+]1CCC1C	CC1[CH+]CC1C	C6H11+	C6H11+
C6H11+	C6H11+	38.7	32.3	CC1[CH+]CC1C	C[CH+]C(C)C=C		27.76	-27.76	43.24	32.3	-32.3	38.7	C[CH+]C(C)C=C	CC1[CH+]CC1C	C6H11+	C6H11+
C6H11+	C6H11+	23.46	47.54	CC1[CH+]CC1C	C[CH+]C1CC1C		43.37	-43.37	27.63	47.54	-47.54	23.46	C[CH+]C1CC1C	CC1[CH+]CC1C	C6H11+	C6H11+
C6H11+	C6H11+	24.1	46.9	CC1[CH+]CC1C	[CH2+]C1C(C)C1C		44.97	-44.97	26.03	46.9	-46.9	24.1	[CH2+]C1C(C)C1C	CC1[CH+]CC1C	C6H11+	C6H11+
C6H11+	C6H11+	37.54	33.46	CC1[CH+]CC1C	[CH2+]C1CCC1C		34.93	-34.93	36.07	33.46	-33.46	37.54	[CH2+]C1CCC1C	CC1[CH+]CC1C	C6H11+	C6H11+
C6H11+	C6H11+	29.83	41.17	CC1[CH+]CC1C	[CH2+]C1CCC1C		42.64	-42.64	28.36	41.17	-41.17	29.83	[CH2+]C1CCC1C	CC1[CH+]CC1C	C6H11+	C6H11+
C5H8	C6H11+	61.27	9.73	CC1[CH+]CC1C	CC1C=CC1	[CH3+]	32.76	-32.76	38.24	9.73	-9.73	61.27	CC1C=CC1	CC1[CH+]CC1C	C5H8	C6H11+
C5H8	C6H11+	58.9	12.1	CC1[CH+]CC1C	CC1C=CC1	[CH3+]	35.13	-35.13	35.87	12.1	-12.1	58.9	CC1C=CC1	CC1[CH+]CC1C	C5H8	C6H11+
C6H10	C6H11+	64.87	6.13	CC1[CH+]CC1C	CC1=CCC1C	[H+]	39.66	-39.66	31.34	6.13	-6.13	64.87	CC1=CCC1C	CC1[CH+]CC1C	C6H10	C6H11+
C6H10	C6H11+	70.13	0.87	CC1[CH+]CC1C	CC1C=CC1C	[H+]	39.85	-39.85	31.15	0.87	-0.87	70.13	CC1C=CC1C	CC1[CH+]CC1C	C6H10	C6H11+
C6H10	C6H11+	67.75	3.25	CC1[CH+]CC1C	CC1C=CC1C	[H+]	42.23	-42.23	28.77	3.25	-3.25	67.75	CC1C=CC1C	CC1[CH+]CC1C	C6H10	C6H11+
C6H11+	C6H11+	33.04	37.96	CC1[CH+]CCC1	C[C+]1CCCC1		34.54	-34.54	36.46	37.96	-37.96	33.04	C[C+]1CCCC1	CC1[CH+]CCC1	C6H11+	C6H11+
C6H11+	C6H11+	29.25	41.75	CC1[CH+]CCC1	C[C+]1CCCC1		38.33	-38.33	32.67	41.75	-41.75	29.25	C[C+]1CCCC1	CC1[CH+]CCC1	C6H11+	C6H11+
C6H11+	C6H11+	31.16	39.84	CC1[CH+]CCC1	CC1C[CH+]CC1		40.64	-40.64	30.36	39.84	-39.84	31.16	CC1C[CH+]CC1	CC1[CH+]CCC1	C6H11+	C6H11+
C6H11+	C6H11+	34.69	36.31	CC1[CH+]CCC1	[CH2+]C1CCCC1		41.64	-41.64	29.36	36.31	-36.31	34.69	[CH2+]C1CCCC1	CC1[CH+]CCC1	C6H11+	C6H11+
C6H11+	C6H11+	54.95	16.05	CC1[CH+]CCC1	C=CC(C)C[CH2+]		32.67	-32.67	38.33	16.05	-16.05	54.95	C=CC(C)C[CH2+]	CC1[CH+]CCC1	C6H11+	C6H11+
C5H8	C6H11+	61.98	9.02	CC1[CH+]CCC1	C1C=CCC1	[CH3+]	29.85	-29.85	41.15	9.02	-9.02	61.98	C1C=CCC1	CC1[CH+]CCC1	C5H8	C6H11+
C5H8	C6H11+	58.03	12.97	CC1[CH+]CCC1	C1C=CCC1	[CH3+]	33.8	-33.8	37.2	12.97	-12.97	58.03	C1C=CCC1	CC1[CH+]CCC1	C5H8	C6H11+
C6H10	C6H11+	65.24	5.76	CC1[CH+]CCC1	CC1=CCCC1	[H+]	38.51	-38.51	32.49	5.76	-5.76	65.24	CC1=CCCC1	CC1[CH+]CCC1	C6H10	C6H11+
C6H10	C6H11+	70.68	0.32	CC1[CH+]CCC1	CC1C=CCC1	[H+]	36.49	-36.49	34.51	0.32	-0.32	70.68	CC1C=CCC1	CC1[CH+]CCC1	C6H10	C6H11+
C6H10	C6H11+	66.47	4.53	CC1[CH+]CCC1	CC1C=CCC1	[H+]	40.7	-40.7	30.3	4.53	-4.53	66.47	CC1C=CCC1	CC1[CH+]CCC1	C6H10	C6H11+
C6H11+	C6H11+	31.23	39.77	CC1C[CH+]CC1	CC1[CH+]CCC1		40.96	-40.96	30.04	39.77	-39.77	31.23	CC1[CH+]CCC1	CC1C[CH+]CC1	C6H11+	C6H11+
C6H11+	C6H11+	30.18	40.82	CC1C[CH+]CC1	CC1[CH+]CCC1		42.01	-42.01	28.99	40.82	-40.82	30.18	CC1[CH+]CCC1	CC1C[CH+]CC1	C6H11+	C6H11+
C6H11+	C6H11+	27.94	43.06	CC1C[CH+]CC1	CC1[CH+]CCC1		44.25	-44.25	26.75	43.06	-43.06	27.94	CC1[CH+]CCC1	CC1C[CH+]CC1	C6H11+	C6H11+
C6H10	C6H11+	70.27	0.73	CC1C[CH+]CC1	CC1C=CCC1	[H+]	37.24	-37.24	33.76	0.73	-0.73	70.27	CC1C=CCC1	CC1C[CH+]CC1	C6H10	C6H11+
C6H10	C6H11+	67.27	3.73	CC1C[CH+]CC1	CC1C=CCC1	[H+]	40.24	-40.24	30.76	3.73	-3.73	67.27	CC1C=CCC1	CC1C[CH+]CC1	C6H10	C6H11+
C6H10	C6H11+	70.76	0.24	CC1C[CH+]CC1	CC1CC=CC1	[H+]	36.87	-36.87	34.13	0.24	-0.24	70.76	CC1CC=CC1	CC1C[CH+]CC1	C6H10	C6H11+
C6H10	C6H11+	69.67	1.33	CC1C[CH+]CC1	CC1CC=CC1	[H+]	37.96	-37.96	33.04	1.33	-1.33	69.67	CC1CC=CC1	CC1C[CH+]CC1	C6H10	C6H11+
C6H10	C6H11+	66.46	4.54	CC1C[CH+]CC1	CC1CC=CC1	[H+]	41.17	-41.17	29.83	4.54	-4.54	66.46	CC1CC=CC1	CC1C[CH+]CC1	C6H10	C6H11+
C6H13+	C6H13+	32.61	38.39	CCC[CH+]CC	C[CH+]CCCC		38.65	-38.65	32.35	38.39	-38.39	32.61	C[CH+]CCCC	CCC[CH+]CC	C6H13+	C6H13+
C6H13+	C6H13+	30.01	40.99	CCC[CH+]CC	C[CH+]CCCC		41.25	-41.25	29.75	40.99	-40.99	30.01	C[CH+]CCCC	CCC[CH+]CC	C6H13+	C6H13+
C6H13+	C6H13+	50.01	20.99	CCC[CH+]CC	CCCCC[CH2+]		24.94	-24.94	46.06	20.99	-20.99	50.01	CCCCC[CH2+]	CCC[CH+]CC	C6H13+	C6H13+
C6H13+	C6H13+	33.52	37.48	CCC[CH+]CC	CCCCC[CH2+]		41.43	-41.43	29.57	37.48	-37.48	33.52	CCCCC[CH2+]	CCC[CH+]CC	C6H13+	C6H13+
C4H8	C6H13+	62.56	8.44	CCC[CH+]CC	C=CCC	[CH2+]C	26.11	-26.11	44.89	8.44	-8.44	62.56	C=CCC	CCC[CH+]CC	C4H8	C6H13+
C4H8	C6H13+	57.69	13.31	CCC[CH+]CC	C=CCC	[CH2+]C	30.98	-30.98	40.02	13.31	-13.31	57.69	C=CCC	CCC[CH+]CC	C4H8	C6H13+
C5H10	C6H13+	63.43	7.57	CCC[CH+]CC	CCCC=C	[CH3+]	28.48	-28.48	42.52	7.57	-7.57	63.43	CCCC=C	CCC[CH+]CC	C5H10	C6H13+
C5H10	C6H13+	59.39	11.61	CCC[CH+]CC	CCCC=C	[CH3+]	32.52	-32.52	38.48	11.61	-11.61	59.39	CCCC=C	CCC[CH+]CC	C5H10	C6H13+
C6H12	C6H13+	66.84	4.16	CCC[CH+]CC	CC\C=C/CC	[H+]	39.74	-39.74	31.26	4.16	-4.16	66.84	CC\C=C/CC	CCC[CH+]CC	C6H12	C6H13+
C6H12	C6H13+	66.74	4.26	CCC[CH+]CC	CCC/C=C\C	[H+]	39.96	-39.96	31.04	4.26	-4.26	66.74	CCC/C=C\C	CCC[CH+]CC	C6H12	C6H13+
C4H9+	C4H9+	28.88	42.12	CCC[CH2+]	C[CH+]CC		38.52	-38.52	32.48	42.12	-42.12	28.88	C[CH+]CC	CCC[CH2+]	C4H9+	C4H9+
C2H5+	C4H9+	62.55	8.45	CCC[CH2+]	[CH2+]C	C=C	26.56	-26.56	44.44	8.45	-8.45	62.55	[CH2+]C	CCC[CH2+]	C2H5+	C4H9+
C2H5+	C4H9+	57.81	13.19	CCC[CH2+]	[CH2+]C	C=C	31.3	-31.3	39.7	13.19	-13.19	57.81	[CH2+]C	CCC[CH2+]	C2H5+	C4H9+
C4H8	C4H9+	66.08	4.92	CCC[CH2+]	C=CCC	[H+]	39	-39	32	4.92	-4.92	66.08	C=CCC	CCC[CH2+]	C4H8	C4H9+
C6H13+	C6H13+	45.66	25.34	CCCCC[CH2+]	CCC[CH+]CC		20.53	-20.53	50.47	25.34	-25.34	45.66	CCC[CH+]CC	CCCCC[CH2+]	C6H13+	C6H13+
C6H13+	C6H13+	29.29	41.71	CCCCC[CH2+]	CCC[CH+]CC		36.9	-36.9	34.1	41.71	-41.71	29.29	CCC[CH+]CC	CCCCC[CH2+]	C6H13+	C6H13+
C6H13+	C6H13+	53.72	17.28	CCCCC[CH2+]	C[CH+]CCCC		13.22	-13.22	57.78	17.28	-17.28	53.72	C[CH+]CCCC	CCCCC[CH2+]	C6H13+	C6H13+
C6H13+	C6H13+	48.48	22.52	CCCCC[CH2+]	C[CH+]CCCC		18.46	-18.46	52.54	22.52	-22.52	48.48	C[CH+]CCCC	CCCCC[CH2+]	C6H13+	C6H13+
C6H13+	C6H13+	28.86	42.14	CCCCC[CH2+]	C[CH+]CCCC		38.08	-38.08	32.92	42.14	-42.14	28.86	C[CH+]CCCC	CCCCC[CH2+]	C6H13+	C6H13+
C4H9+	C6H13+	61.69	9.31	CCCCC[CH2+]	CCC[CH2+]	C=C	26.29	-26.29	44.71	9.31	-9.31	61.69	CCC[CH2+]	CCCCC[CH2+]	C4H9+	C6H13+
C4H9+	C6H13+	57.14	13.86	CCCCC[CH2+]	CCC[CH2+]	C=C	30.84	-30.84	40.16	13.86	-13.86	57.14	CCC[CH2+]	CCCCC[CH2+]	C4H9+	C6H13+
C6H12	C6H13+	68.72	2.28	CCCCC[CH2+]	C=CCCCC	[H+]	36.29	-36.29	34.71	2.28	-2.28	68.72	C=CCCCC	CCCCC[CH2+]	C6H12	C6H13+
C6H12	C6H13+	66.15	4.85	CCCCC[CH2+]	C=CCCCC	[H+]	38.86	-38.86	32.14	4.85	-4.85	66.15	C=CCCCC	CCCCC[CH2+]	C6H12	C6H13+
C8H17+	C8H17+	28.05	42.95	[CH2+]C(C)C(C)CCC	C[C+](C)C(C)CCC		32.89	-32.89	38.11	42.95	-42.95	28.05	C[C+](C)C(C)CCC	[CH2+]C(C)C(C)CCC	C8H17+	C8H17+
C8H17+	C8H17+	24.7	46.3	[CH2+]C(C)C(C)CCC	C[C+](C)C(C)CCC		36.24	-36.24	34.76	46.3	-46.3	24.7	C[C+](C)C(C)CCC	[CH2+]C(C)C(C)CCC	C8H17+	C8H17+
C8H17+	C8H17+	28.7	42.3	[CH2+]C(C)C(C)CCC	C[C+](CCC)C(C)C		33.74	-33.74	37.26	42.3	-42.3	28.7	C[C+](CCC)C(C)C	[CH2+]C(C)C(C)CCC	C8H17+	C8H17+
C8H17+	C8H17+	45.96	25.04	[CH2+]C(C)C(C)CCC	CC[CH+]C(C)C(C)C		18.44	-18.44	52.56	25.04	-25.04	45.96	CC[CH+]C(C)C(C)C	[CH2+]C(C)C(C)CCC	C8H17+	C8H17+
C8H17+	C8H17+	54.74	16.26	[CH2+]C(C)C(C)CCC	CC(C)C(C)C[CH+]C		10.74	-10.74	60.26	16.26	-16.26	54.74	CC(C)C(C)C[CH+]C	[CH2+]C(C)C(C)CCC	C8H17+	C8H17+
C8H17+	C8H17+	51.74	19.26	[CH2+]C(C)C(C)CCC	[CH2+]C(CCC)C(C)C		20.84	-20.84	50.16	19.26	-19.26	51.74	[CH2+]C(CCC)C(C)C	[CH2+]C(C)C(C)CCC	C8H17+	C8H17+
C8H17+	C8H17+	59.29	11.71	[CH2+]C(C)C(C)CCC	CC(C)C(C)CC[CH2+]		13.4	-13.4	57.6	11.71	-11.71	59.29	CC(C)C(C)CC[CH2+]	[CH2+]C(C)C(C)CCC	C8H17+	C8H17+
C7H14	C8H17+	24.98	46.02	[CH2+]C(C)C(C)CCC	CC1CCCC1C	[CH3+]	48.54	-48.54	22.46	46.02	-46.02	24.98	CC1CCCC1C	[CH2+]C(C)C(C)CCC	C7H14	C8H17+
C3H6	C8H17+	57.04	13.96	[CH2+]C(C)C(C)CCC	C=CC	CCC[CH+]C	20.51	-20.51	50.49	13.96	-13.96	57.04	C=CC	[CH2+]C(C)C(C)CCC	C3H6	C8H17+
[truncated: 1,323 more rows]
