# Supplementary material for: Unveiling the reaction pathways of hydrocarbonsviaexperiments, computations and data science
Source: Royal Society of Chemistry journal article supplement (doi:10.1039/d2cp04499d), 2022-01-01
Supplement: d2cp04499d4.pdf [file d2cp04499d4.pdf]

## Supporting Information

“Unveiling the Reaction Pathways of Hydrocarbon via Experiment, Computations and Data Science”

Lauren Takahashi†, Shigehiro Yoshida‡, Jun Fujima†, Hiroshi Oikawa\*‡, Keisuke Takahashi\*†

†Department of Chemistry, Hokkaido University, North 10, West 8, Sapporo 060-8510, Japan

‡Innovative Research Excellence, Power unit & Energy, Honda R&D Co., Ltd., 1-4-1 Chuo, Wako, Saitama, 351-0193, Japan

Corresponding Author: [hiroshi.oikawa@jp.honda](mailto:hiroshi.oikawa@jp.honda); [keisuke.takahashi@sci.hokudai.ac.jp](mailto:keisuke.takahashi@sci.hokudai.ac.jp)

| <b><u>Molecule</u></b> | <b><u>In/Out Degrees</u></b> | <b><u>Degree</u></b> |
|------------------------|------------------------------|----------------------|
| [H+]                   | 218 / 218                    | 436                  |
| [CH3+]                 | 126 / 126                    | 252                  |
| [CH2+]C                | 53 / 53                      | 106                  |
| C=C                    | 38 / 38                      | 76                   |
| C=CC                   | 34 / 34                      | 68                   |
| C[C+](CC)C(C)CC        | 33 / 33                      | 66                   |
| C[C+](CCC)C(C)C        | 32 / 32                      | 64                   |
| CC[CH+]C(C)C(C)C       | 32 / 32                      | 64                   |
| CC1C(C)C1C[CH+]C       | 29 / 29                      | 58                   |
| [CH2+]CC1CC1CCC        | 29 / 29                      | 58                   |

Table S1. Top 10 nodes with the highest degrees of the network illustrated in Figure 1.

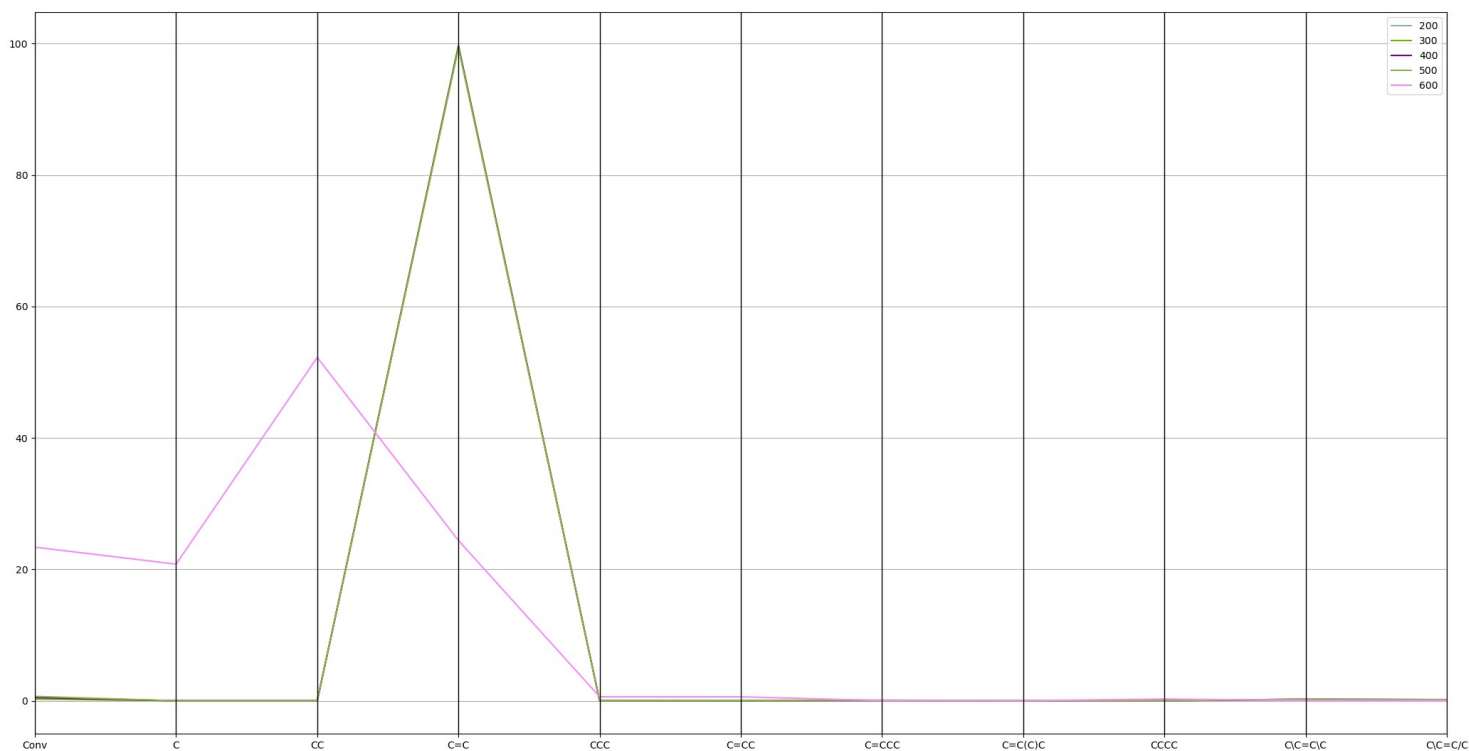

Figure S1. Parallel coordinate of C<sub>2</sub>H<sub>4</sub> (C=C) conversion and percentage of molecules from C<sub>2</sub>H<sub>4</sub> after the reaction out of a total percentage of 100 for all products. Color indicates the temperature in °C.

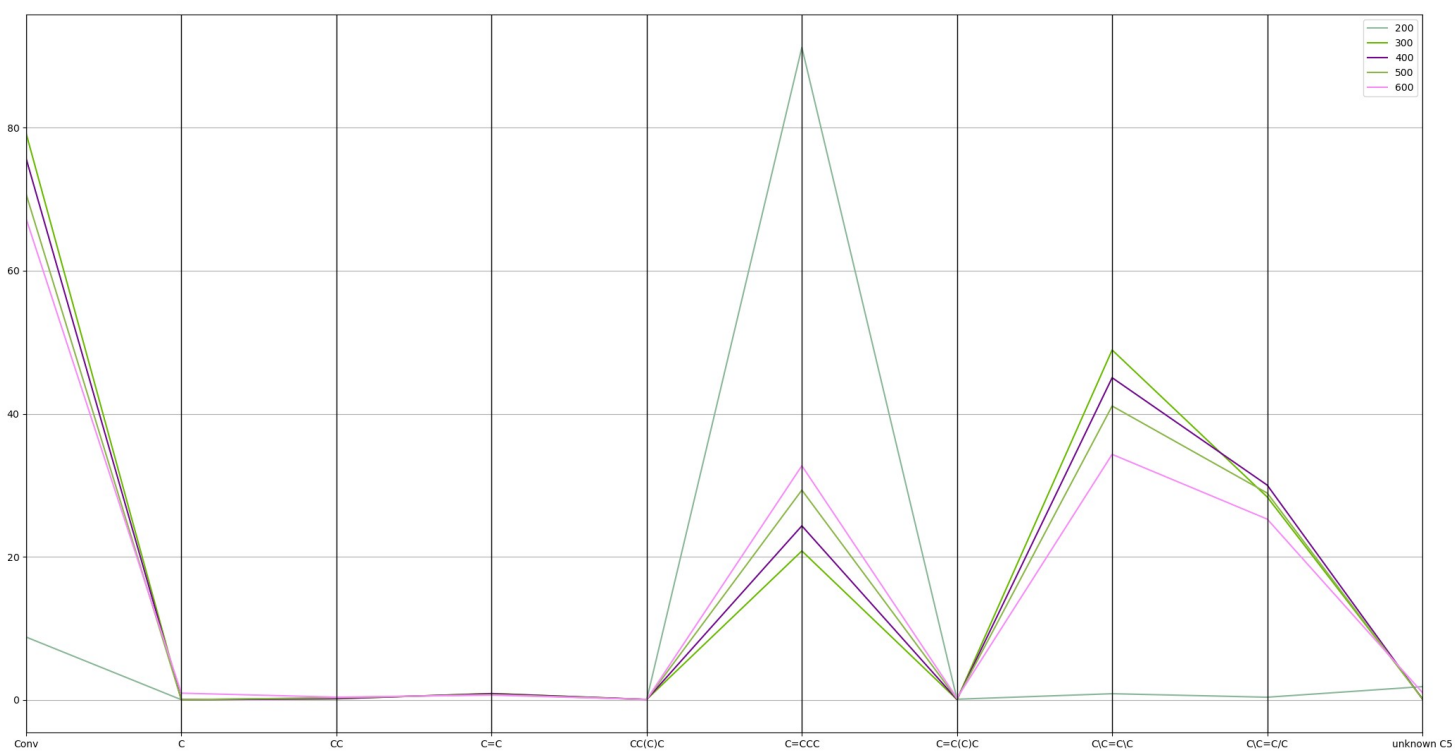

Figure S2. Parallel coordinate of 1-C<sub>4</sub>H<sub>8</sub> (C=CCC) conversion and percentage of molecules from 1-C<sub>4</sub>H<sub>8</sub> after the reaction out of a total percentage of 100 for all products. Color indicates the temperature in °C.

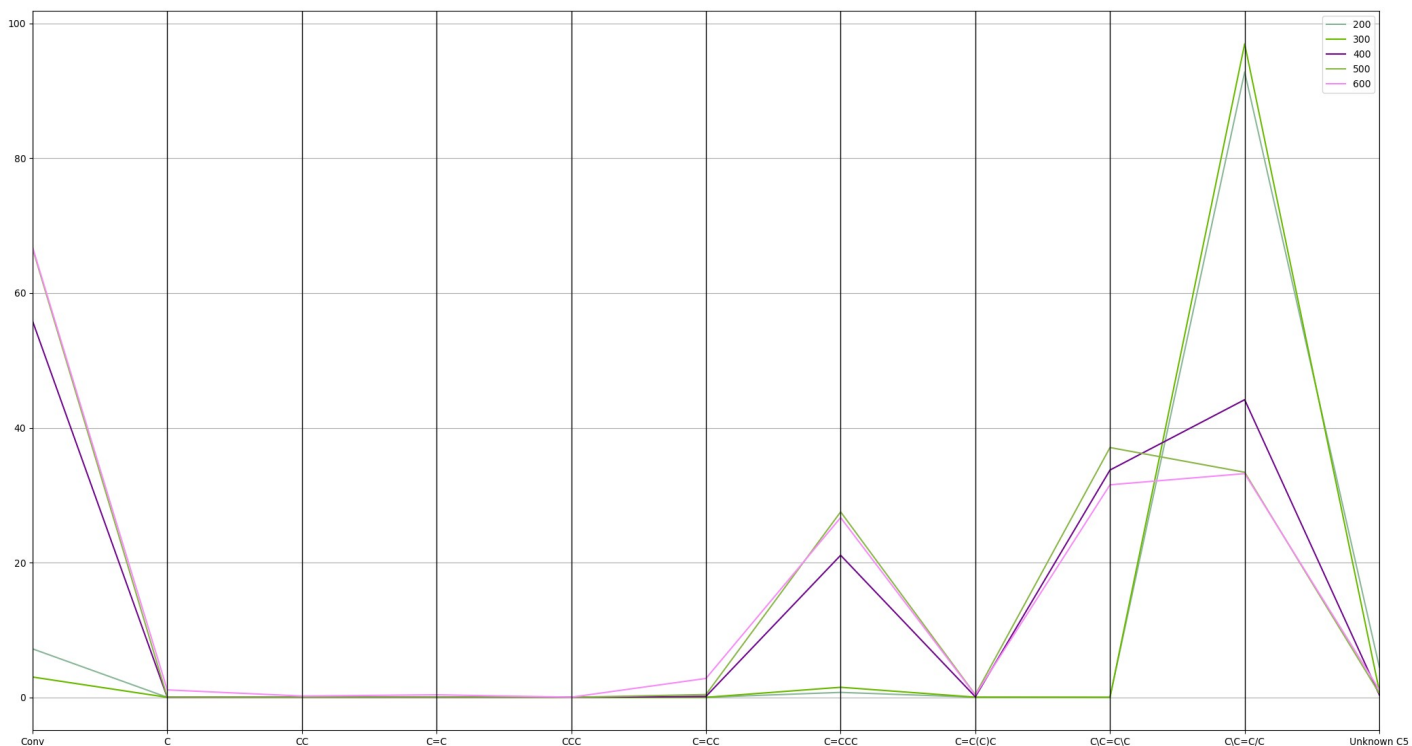

Figure S3. Parallel coordinate of cis-2-C<sub>4</sub>H<sub>8</sub> (C\C=C/C) conversion and percentage of molecules from cis-2-C<sub>4</sub>H<sub>8</sub> after the reaction out of a total percentage of 100 for all products. Color indicates the temperature in °C.

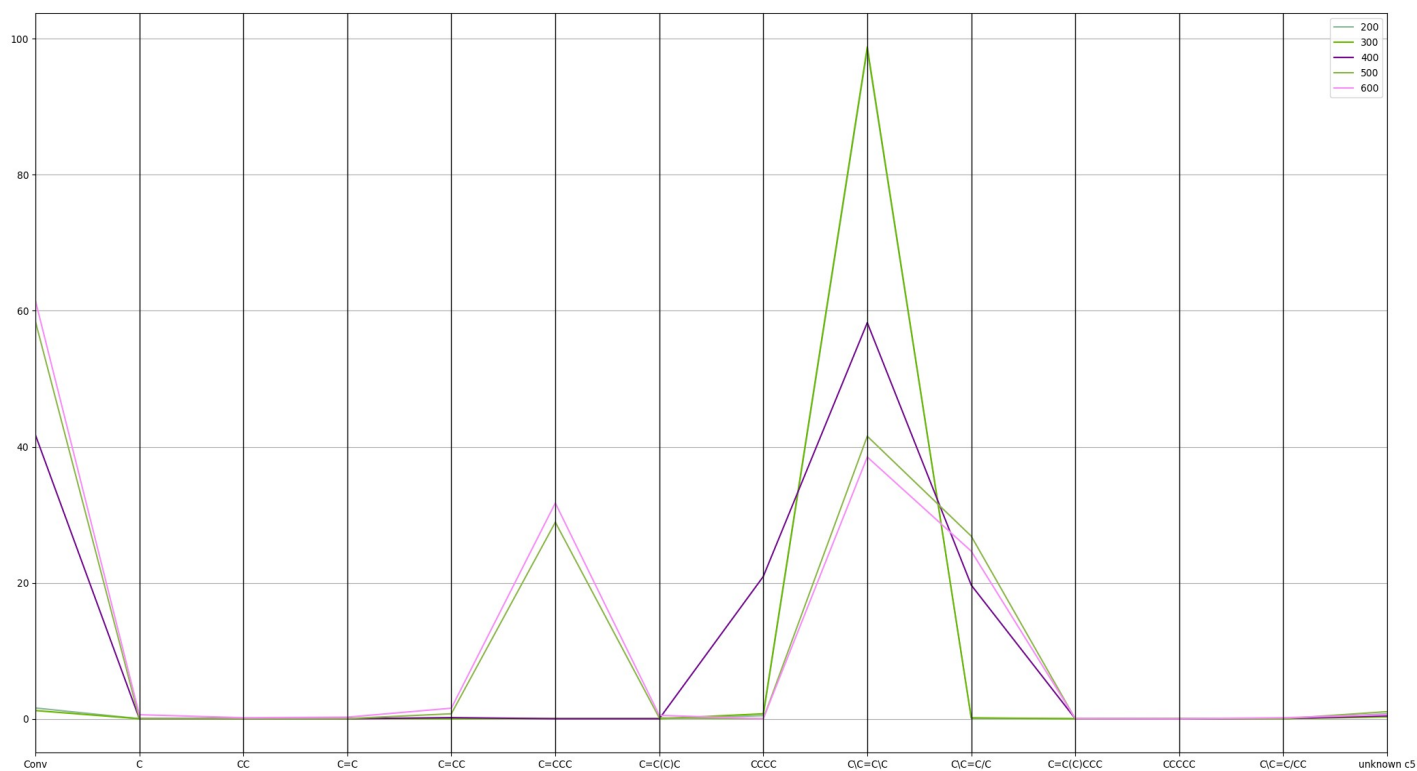

Figure S4. Parallel coordinate of trans-2-C<sub>4</sub>H<sub>8</sub> (C\C=C\C) conversion and percentage of molecules from trans-2-C<sub>4</sub>H<sub>8</sub> after the reaction out of a total percentage of 100 for all products. Color indicates the temperature in °C.

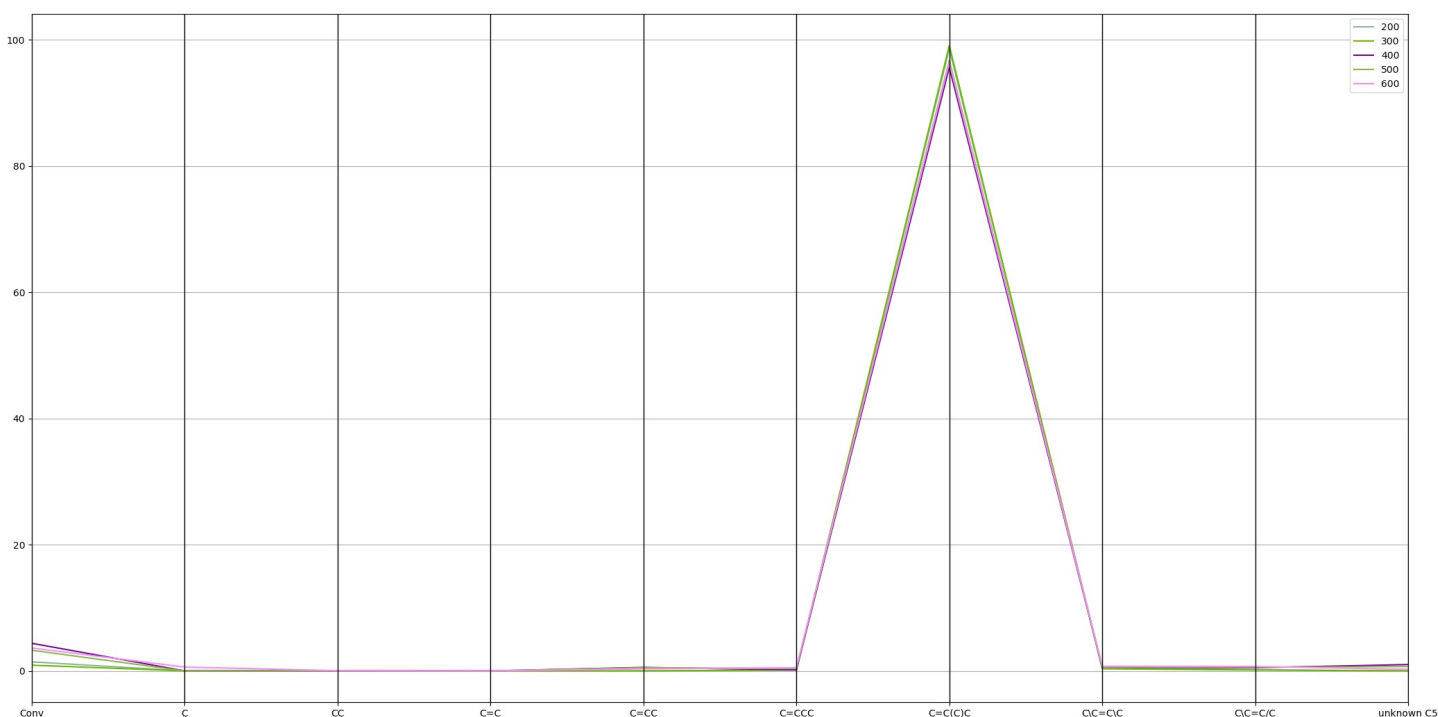

Figure S5. Parallel coordinate of iso-C<sub>4</sub>H<sub>8</sub> (C=C(C)C) conversion and percentage of molecules from iso-C<sub>4</sub>H<sub>8</sub> after the reaction out of a total percentage of 100 for all products. Color indicates the temperature in °C.





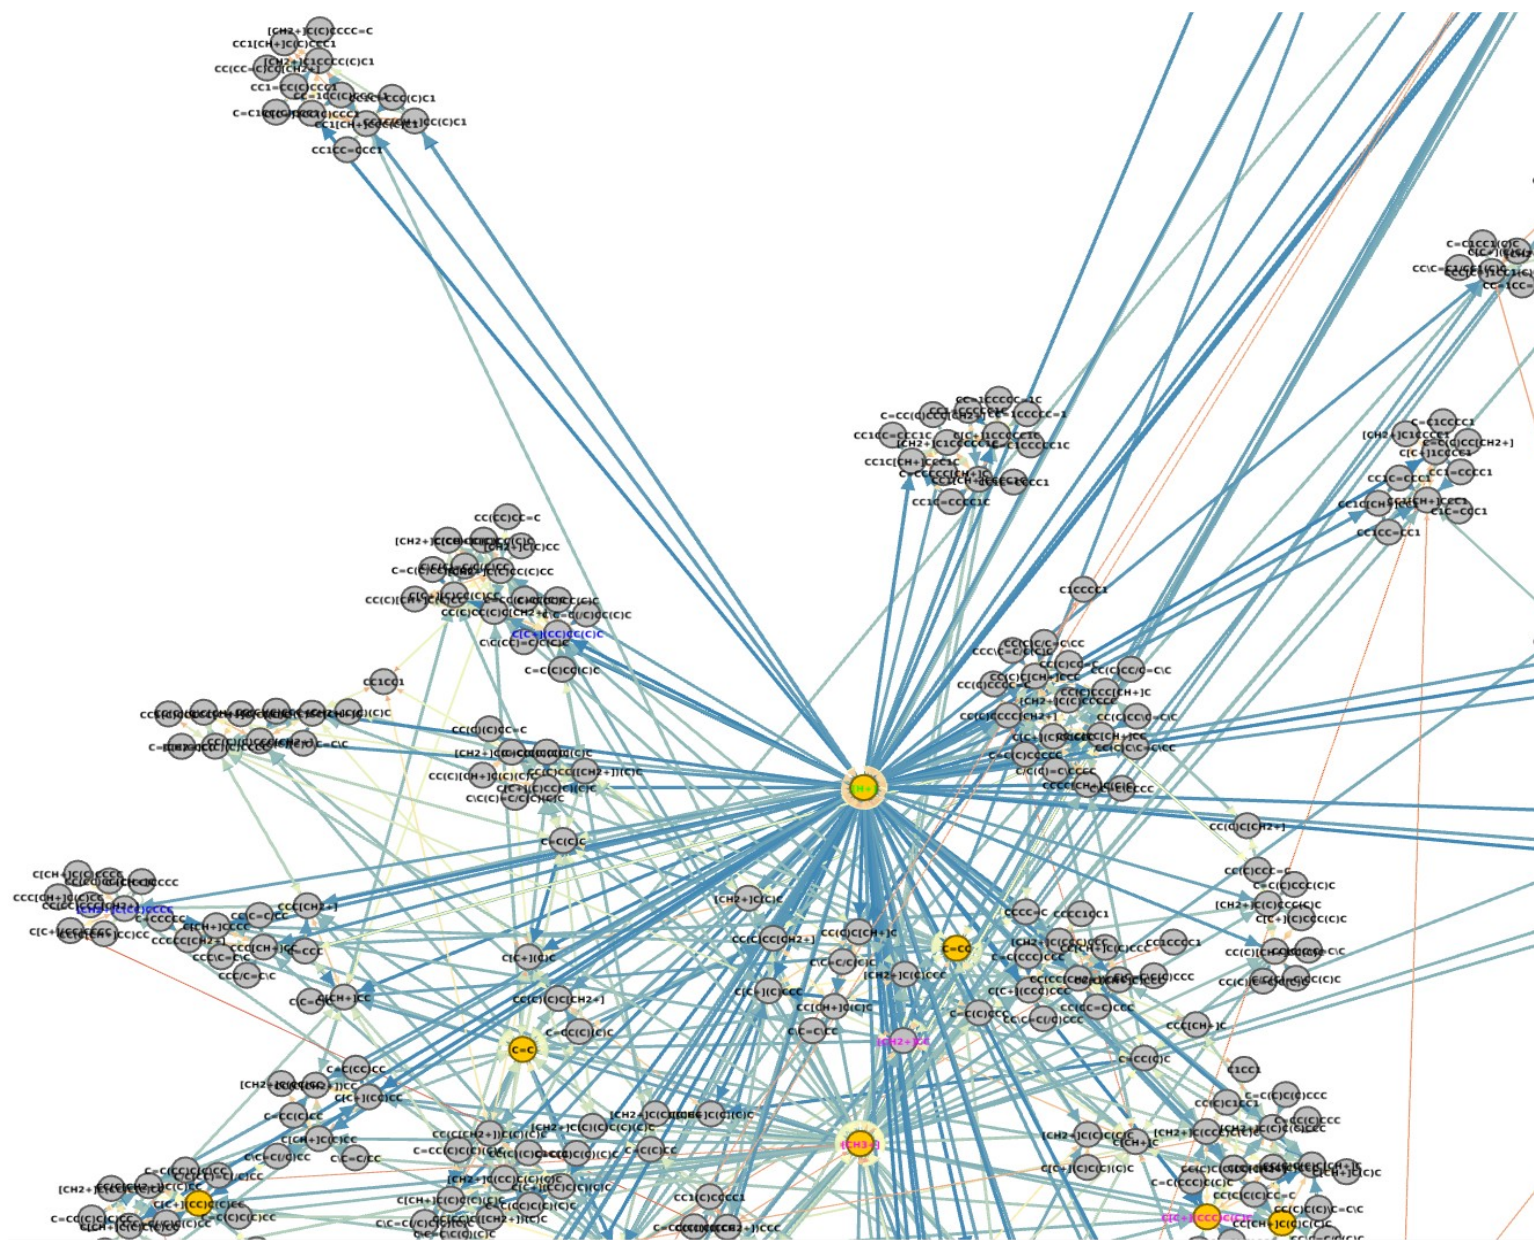

Figure S7. A zoomed-in portion of the reaction network illustrated in Figure 1.

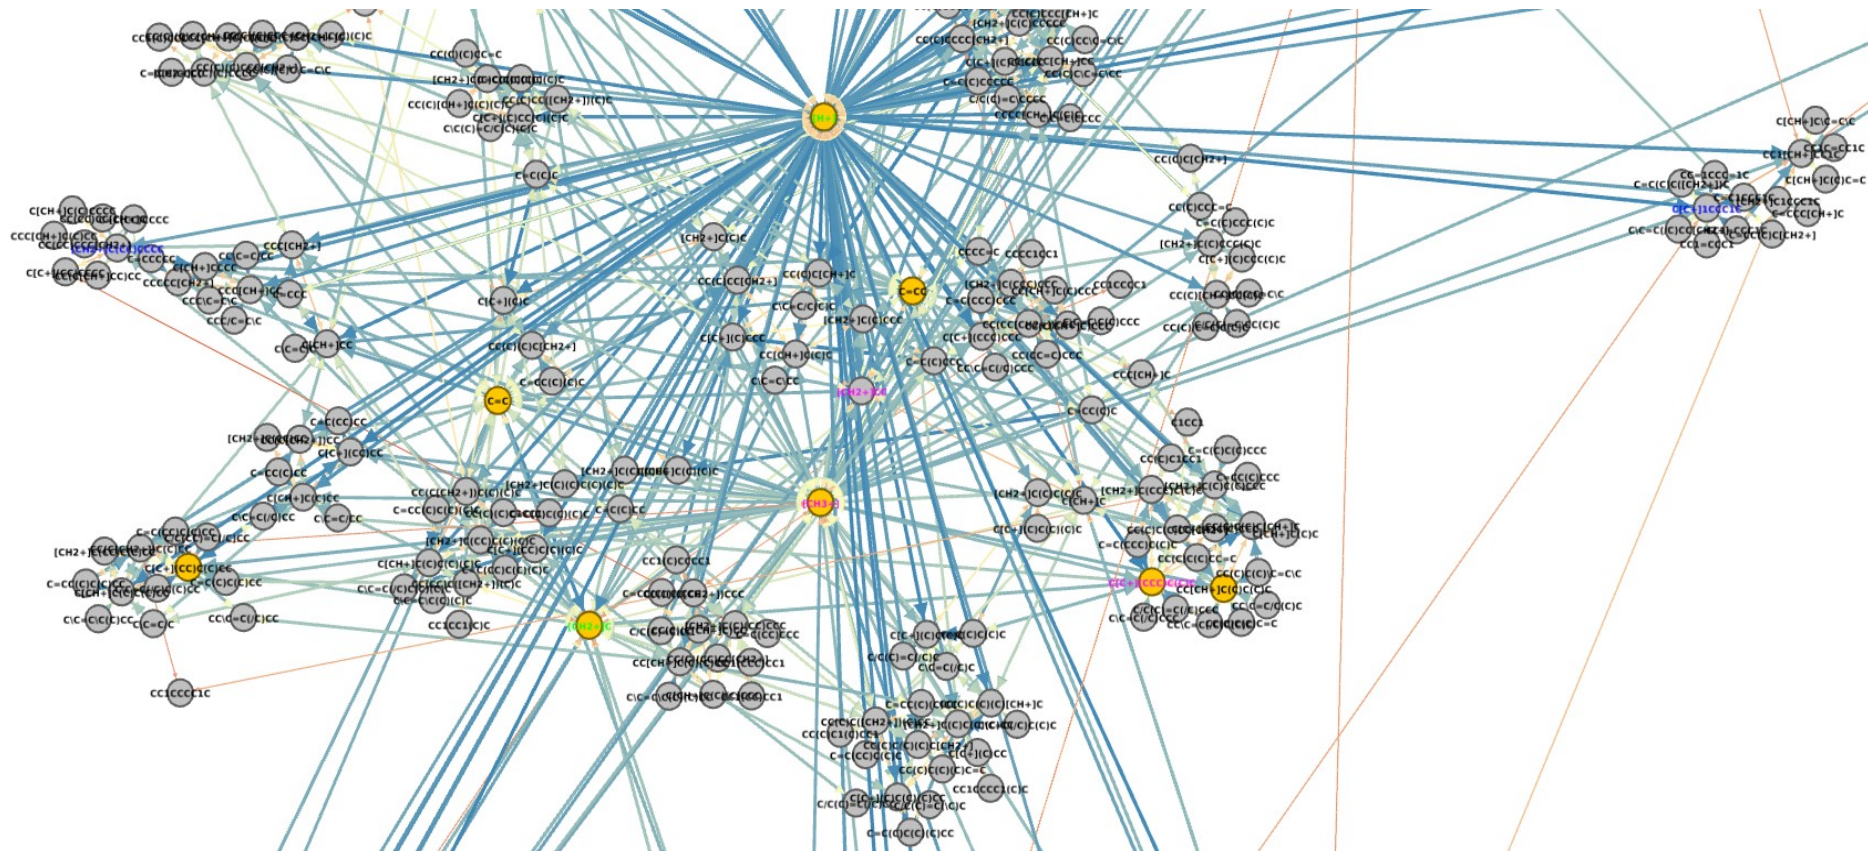

Figure S8. A zoomed-in portion of the reaction network illustrated in Figure 1.



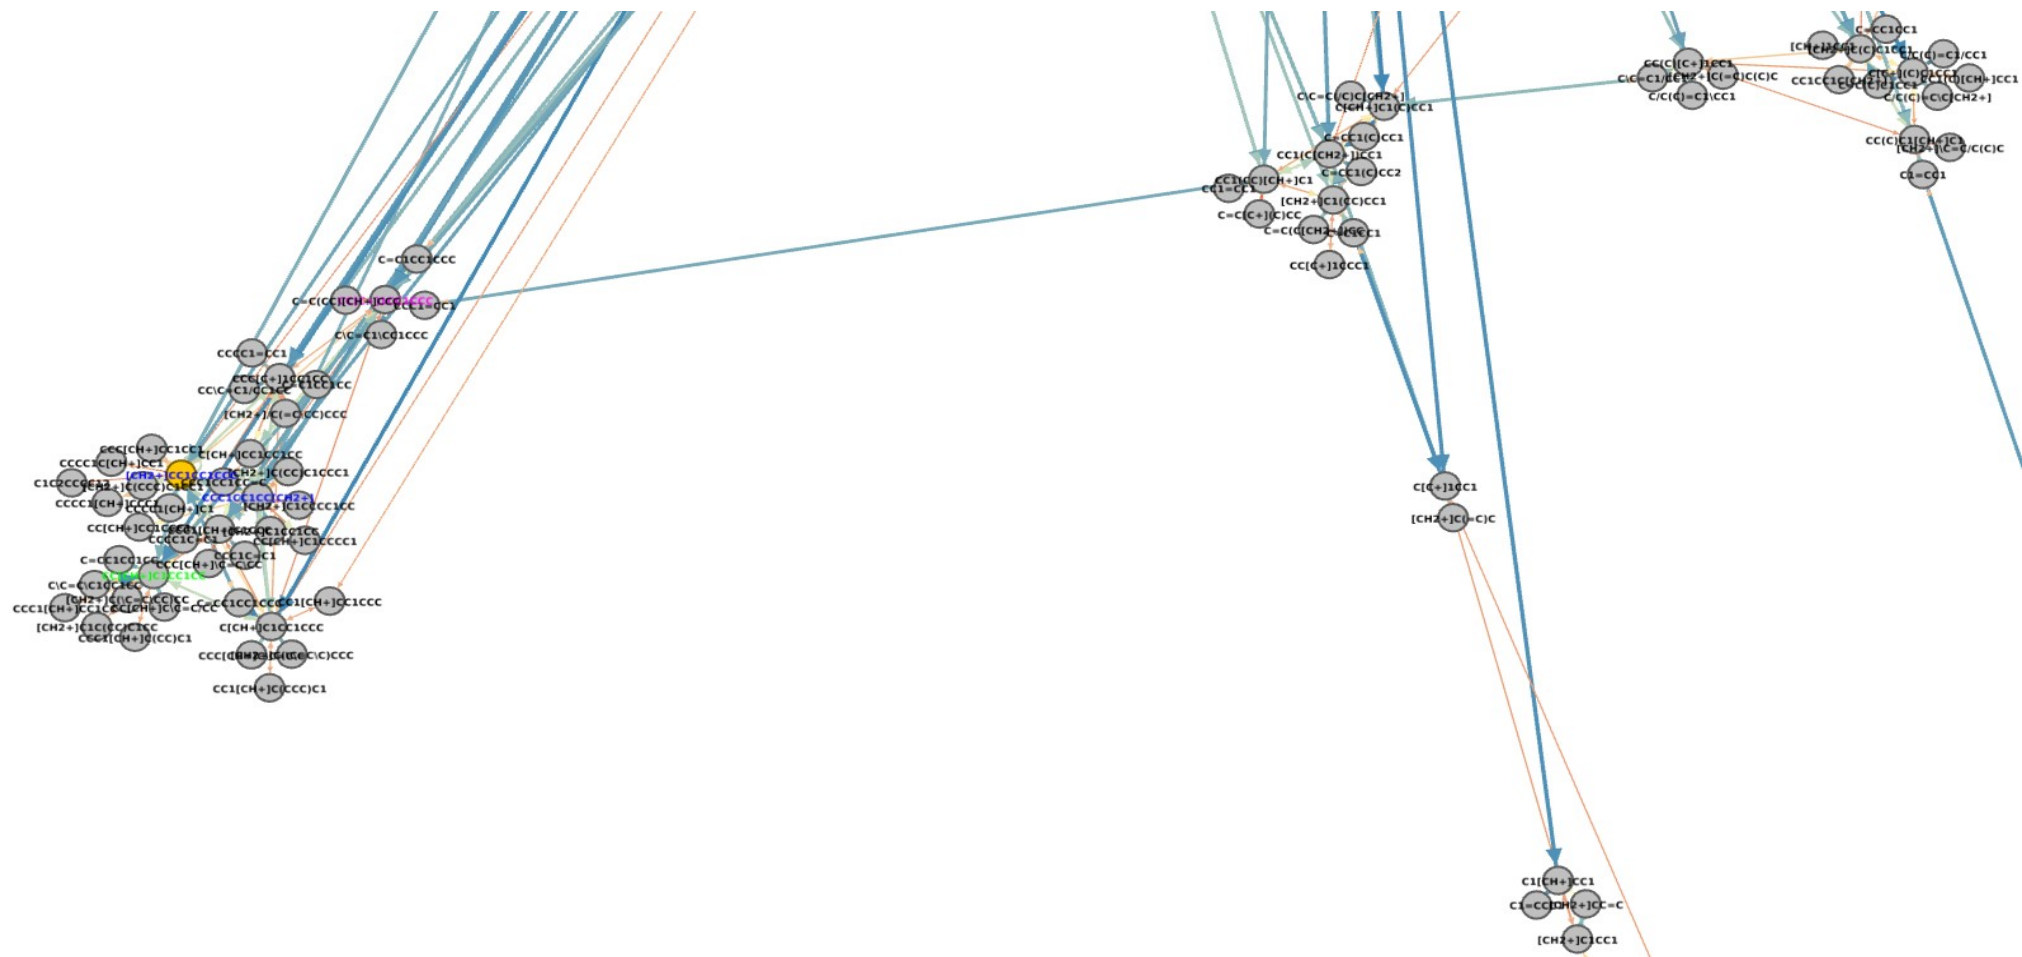

Figure S9. A zoomed-in portion of the reaction network illustrated in Figure 1.

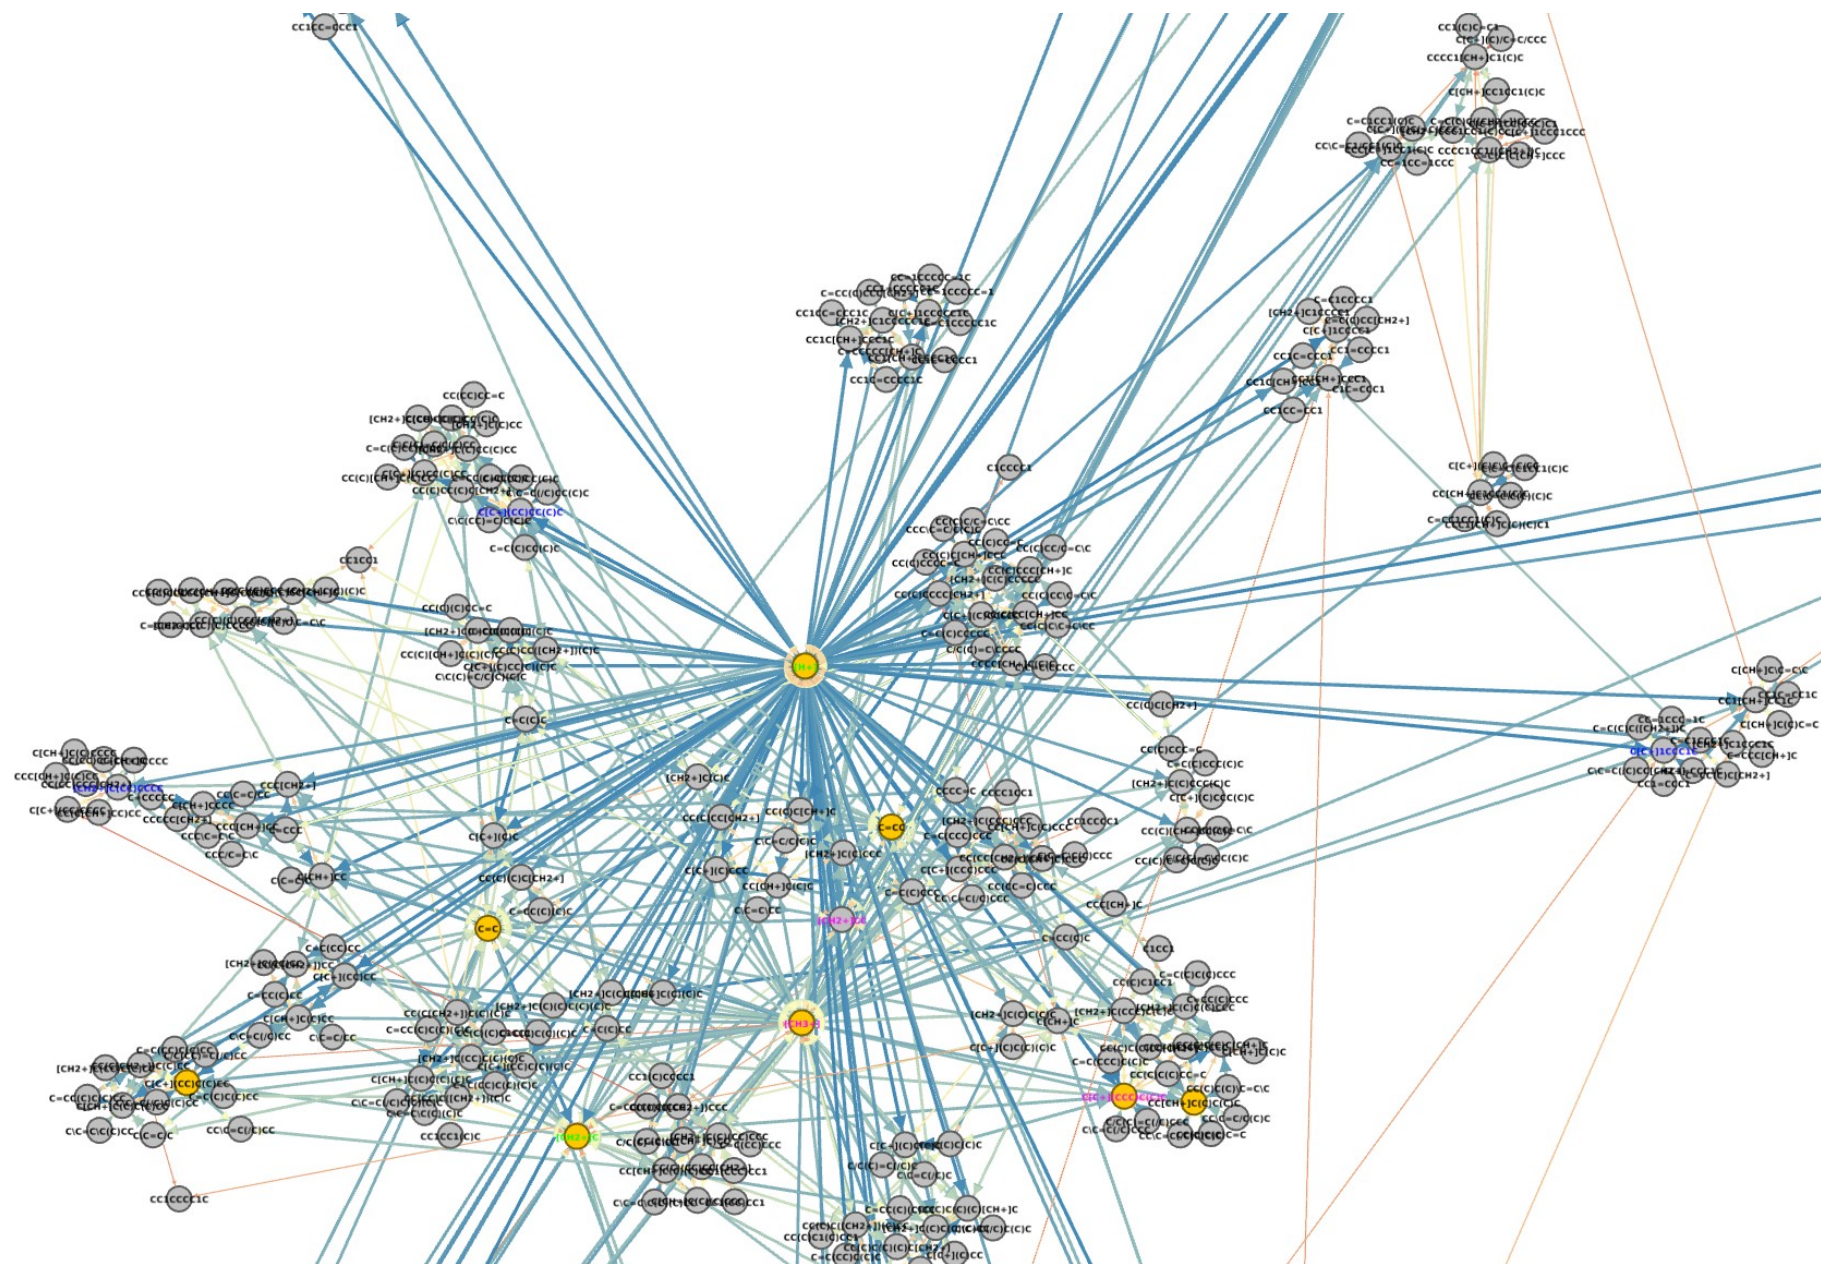

Figure S10. A zoomed-in portion of the reaction network illustrated in Figure 4.
